# Supplementary material for: Implications of the KHDC4-TRAF2 axis in the context of prostate cancer prognosis
Source: Aging (Albany NY). 2025 Jun 23;17(6):1544–70. doi: 10.18632/aging.206273 (PMC12245195; doi:10.18632/aging.206273)
Supplement: Supplementary Table 1 [file aging-17-206273-s002.xlsx]

## Sheet: Supplementary Table 1
Supplementary Table 1. Genes upregulated and downregulated in late-stage TCGA-PRAD transcriptome profiles.
Gene Symbol	logFC	AveExpr	t	P.Value	B
FAM83D	1.92404	2.90983	4.98729	2.641e-05	2.40599
WEE1	0.860215	4.88107	4.82319	4.16505e-05	2.15413
GPC6	1.60559	4.11611	4.5867	8.02063e-05	1.54841
CBX1	0.671985	6.27678	4.57432	8.2999e-05	1.50381
DNAH8	2.71176	3.48704	4.53159	9.34072e-05	1.38293
C7orf70	0.57112	4.4077	4.5304	9.37137e-05	1.41004
PLEKHF2	1.12084	4.44683	4.45787	0.000114491	1.22714
GLO1	1.12802	8.89266	4.44777	0.000117725	1.19519
CIT	1.65927	2.00008	4.38438	0.000140193	0.855531
PPPDE1	0.740522	5.30859	4.37669	0.000143192	1.00794
TSPAN12	1.39267	4.0796	4.35372	0.000152536	0.966819
GATA6	1.01014	2.69704	4.33582	0.000160231	0.839795
STMN2	3.55623	0.128644	4.27197	0.000190951	0.276816
FAM102B	1.0353	4.28177	4.20348	0.000230375	0.592139
RIT1	0.629508	4.60148	4.16056	0.000259071	0.478042
OSGIN2	0.797864	4.64725	4.05138	0.0003489	0.204371
STMN1	1.17564	5.74701	4.0367	0.000363112	0.137461
KIAA1524	1.38199	1.97148	4.03302	0.000366758	0.0654828
STK3	0.641191	4.88601	4.02862	0.000371169	0.13983
ANKRD46	0.75263	4.64087	4.02725	0.000372558	0.144581
KIF15	2.04537	0.68708	4.0259	0.000373925	-0.121969
C7orf29	0.935037	2.84408	3.95652	0.000451352	-0.0306502
DSN1	0.613154	3.83931	3.95372	0.000454786	-0.0142373
ENAH	0.771423	7.11308	3.9485	0.000461253	-0.0908154
AMIGO2	1.62422	3.5075	3.93456	0.00047898	-0.0594697
TMPO	0.903237	5.37179	3.92025	0.000497873	-0.145502
FAM164A	0.999003	4.28701	3.91211	0.000508954	-0.12708
KCNJ3	3.11336	0.0868195	3.90819	0.000514364	-0.458507
ARL6IP1	0.802513	7.98838	3.88227	0.000551644	-0.241918
CTSL2	1.32651	0.93839	3.87671	0.000559977	-0.396022
FAM171B	1.71562	3.02887	3.87566	0.000561556	-0.209502
CRBN	0.516986	5.18055	3.83521	0.000626188	-0.350776
TPM3	0.548918	7.65026	3.81884	0.000654348	-0.406029
YWHAZ	0.738568	9.4684	3.80608	0.000677172	-0.404699
RAI14	0.912839	5.18815	3.80175	0.000685088	-0.433667
SLCO1A2	3.14388	0.808425	3.80007	0.000688178	-0.572072
SLC25A24	0.850757	4.53828	3.78776	0.00071129	-0.441309
CBX2	1.9677	2.19991	3.77468	0.000736684	-0.487264
PABPC1	0.734896	10.7439	3.75499	0.000776568	-0.50942
CDCA4	0.702215	3.30066	3.74872	0.000789701	-0.49989
AURKA	1.32413	1.93687	3.71578	0.000862379	-0.637286
NUCKS1	0.59684	8.6234	3.71339	0.000867887	-0.646467
MLF1IP	1.19731	2.83841	3.70398	0.000889968	-0.611898
C15orf42	1.45276	0.563129	3.70251	0.000893462	-0.802667
ANP32E	0.991511	4.4374	3.69406	0.000913819	-0.664053
KIF23	1.49581	1.36334	3.68655	0.000932286	-0.748888
DNAJB6	0.422051	5.81055	3.68467	0.000936961	-0.739847
FMR1	0.556358	5.36225	3.67879	0.00095175	-0.741648
SEMA5A	1.16796	3.76099	3.67688	0.00095662	-0.675342
C12orf48	1.40753	1.14001	3.64416	0.00104358	-0.858928
IGF2BP2	1.57007	0.422634	3.63875	0.0010587	-0.948437
SLC44A1	0.582116	6.24675	3.6313	0.00107984	-0.878515
SYK	0.995741	4.1553	3.62189	0.00110712	-0.822864
SYNGR3	1.61935	-0.834921	3.61974	0.00111346	-1.15881
SERPINE2	1.1389	3.28804	3.61777	0.0011193	-0.804276
PANK1	1.30553	1.8267	3.61121	0.00113892	-0.872322
MAPK14	0.531581	5.53175	3.59518	0.0011883	-0.950933
ZNF138	0.601336	3.27416	3.57386	0.00125724	-0.905417
RNF19A	0.95506	5.63868	3.57307	0.00125986	-1.00781
CKS2	0.972859	3.73551	3.56834	0.00127571	-0.929934
ST6GALNAC5	2.50875	1.71381	3.56668	0.00128132	-0.975724
MCM4	1.37003	4.53658	3.55688	0.00131487	-0.999119
FAM105A	0.941678	5.59284	3.55366	0.0013261	-1.05351
C17orf76	1.11289	1.50158	3.55043	0.00133745	-1.02518
PMAIP1	1.32254	2.02243	3.53925	0.00137747	-1.01513
CUL4B	0.617751	6.63797	3.53829	0.00138097	-1.10763
PRUNE	0.524067	5.45656	3.51992	0.00144941	-1.13068
C8orf83	0.722728	6.09961	3.51931	0.00145172	-1.14879
TCFL5	0.636246	3.89199	3.51113	0.0014833	-1.07094
SLC9A6	0.584158	3.42584	3.50213	0.00151879	-1.07328
LRRC31	2.57755	1.14899	3.49924	0.00153038	-1.15885
FUT8	0.615533	3.98331	3.49606	0.00154321	-1.1111
BLZF1	0.678525	4.50136	3.49599	0.00154351	-1.14219
DNMT3B	1.59201	0.863697	3.49334	0.00155426	-1.19519
ISX	2.05002	1.618	3.48706	0.00158009	-1.151
WNT5A	1.28601	3.95167	3.48039	0.00160798	-1.14601
SMC4	0.98992	4.62386	3.4776	0.00161981	-1.19308
KPNA4	0.544835	6.34106	3.47493	0.00163119	-1.2593
NCK2	0.586021	5.55611	3.46409	0.00167815	-1.26818
DHRS2	1.67294	-0.494638	3.46379	0.00167948	-1.40153
XRCC2	1.37832	0.201335	3.46018	0.00169542	-1.3269
KIAA1211	1.15818	2.1017	3.45921	0.00169973	-1.18395
RFC5	0.600651	3.65112	3.45355	0.00172513	-1.19328
2024-09-08	0.542427	5.7456	3.4531	0.00172715	-1.30025
MLLT11	0.863956	2.13401	3.44953	0.00174336	-1.20344
ZNF706	0.615403	5.79163	3.44664	0.0017566	-1.317
MID1	0.838404	4.51795	3.44595	0.00175977	-1.26173
NMNAT2	2.08491	0.452806	3.44517	0.00176335	-1.33051
ZNF354A	0.584007	3.35566	3.4375	0.00179905	-1.21926
ZNF860	1.15256	2.31593	3.42825	0.00184303	-1.2428
TCEA1	0.603895	6.34396	3.42437	0.00186179	-1.38075
TROVE2	0.466979	6.15412	3.41079	0.00192893	-1.41067
HES6	1.42769	2.5309	3.41034	0.00193117	-1.27647
GNPDA1	0.473467	5.65526	3.40893	0.00193829	-1.40321
CHPT1	0.574439	5.90773	3.40802	0.00194291	-1.41231
STX6	0.616491	5.50965	3.3993	0.00198758	-1.42141
C1orf135	1.21993	-0.472518	3.39849	0.00199173	-1.52073
HIGD1A	0.536375	6.34326	3.38959	0.00203844	-1.46389
RAB33B	0.670106	3.90667	3.38713	0.00205154	-1.36017
DGAT2	1.1898	3.31356	3.37292	0.00212872	-1.36447
CBWD6	0.881858	2.57916	3.3697	0.00214661	-1.36467
OVOL1	1.36209	2.62813	3.36838	0.00215396	-1.36703
TMEM65	1.07763	3.62971	3.36581	0.00216835	-1.39369
CDC25C	1.88133	-0.438747	3.36466	0.00217487	-1.57985
FAM113B	1.33	1.77513	3.34845	0.00226825	-1.43425
CSPG5	1.04905	1.72267	3.3476	0.00227327	-1.43843
ZIC5	2.46471	-0.700741	3.34182	0.00230754	-1.65198
RAP2B	0.715312	4.26249	3.3383	0.00232866	-1.49697
ZNF367	1.22903	1.54908	3.33013	0.00237844	-1.48303
ARL6IP6	0.671647	3.4988	3.32987	0.00238004	-1.46907
CHMP4C	0.874728	5.11065	3.32951	0.00238224	-1.56992
ASAP2	0.780527	4.90335	3.31128	0.0024972	-1.60165
FAM3C	0.575169	5.51478	3.29566	0.00259994	-1.66664
ABHD4	0.631718	5.4717	3.29556	0.00260056	-1.66528
C1orf112	0.700225	2.26263	3.29304	0.00261755	-1.53538
C18orf54	0.833802	0.865008	3.2891	0.00264423	-1.60627
TRNT1	0.819412	4.68547	3.28739	0.00265591	-1.64407
NRIP3	1.56206	0.613788	3.28621	0.00266404	-1.63004
ASF1B	1.29279	2.11943	3.27731	0.00272576	-1.57203
DONSON	0.837297	2.43943	3.27564	0.0027375	-1.57001
SGOL2	1.02646	2.1275	3.26506	0.00281302	-1.59775
ZNF250	0.572384	3.5748	3.26415	0.0028196	-1.62131
RAD21	0.876394	7.44872	3.26408	0.00282014	-1.75174
PRPF4	0.505926	5.403	3.25929	0.00285508	-1.74758
C5orf30	0.809059	4.59988	3.25646	0.00287588	-1.71011
GINS3	0.573416	2.18289	3.2547	0.00288889	-1.61848
POLR2K	0.542814	5.42011	3.2535	0.00289781	-1.76177
EDARADD	1.74848	3.8159	3.25343	0.00289838	-1.66041
RCC2	0.520829	7.09781	3.25071	0.00291863	-1.78983
ANLN	1.64497	1.82402	3.25049	0.00292032	-1.63702
GMPS	0.571541	5.44491	3.24836	0.00293628	-1.77475
PHTF2	0.688291	3.85802	3.23821	0.00301376	-1.69777
LYSMD1	0.565487	3.29857	3.23748	0.00301942	-1.66724
CCDC99	0.718823	2.78437	3.23207	0.00306156	-1.66464
LRRCC1	0.748054	3.70639	3.23087	0.00307094	-1.70417
ITGB1BP1	0.464641	5.05094	3.23031	0.00307538	-1.79852
OSBPL11	0.589408	4.0055	3.23002	0.00307768	-1.72702
IRF5	0.795485	2.86345	3.22957	0.00308124	-1.67131
QKI	0.831054	5.58394	3.22907	0.00308519	-1.82491
MAL2	0.883209	7.22247	3.22476	0.00311939	-1.84837
BUB1	1.89096	1.40352	3.22253	0.00313726	-1.71051
PDIK1L	0.629308	4.23314	3.22239	0.00313835	-1.76173
DTL	1.49654	1.28071	3.22189	0.00314236	-1.71731
RAP2C	0.478262	4.33477	3.22159	0.00314482	-1.77129
HELLS	1.20879	0.881102	3.20905	0.00324732	-1.76418
SPAG1	1.21372	3.08222	3.20805	0.00325564	-1.72391
TRIM59	0.871041	2.7147	3.20274	0.00330008	-1.72722
ARHGDIG	2.32433	0.755847	3.20033	0.00332043	-1.78894
HMGB2	0.814528	5.67793	3.19367	0.00337741	-1.91041
FAM72B	1.55605	0.130829	3.19344	0.00337939	-1.84667
CCNE2	1.66036	1.17975	3.19047	0.00340503	-1.78527
CAPN2	0.640979	7.28478	3.18582	0.00344564	-1.93778
FAM49B	0.819882	4.74899	3.18021	0.00349526	-1.89581
FBXL2	1.12972	1.86885	3.17994	0.00349764	-1.78198
IQGAP3	1.88673	1.45646	3.17935	0.00350298	-1.79604
PABPC3	1.04405	4.21943	3.17782	0.00351663	-1.86217
C17orf53	1.25487	-0.00643182	3.17564	0.00353624	-1.89125
PHF16	0.782608	4.11356	3.17424	0.0035488	-1.86185
C20orf11	0.359004	6.59923	3.17251	0.00356448	-1.9763
MAD2L1	0.966522	2.81662	3.16506	0.00363272	-1.81014
AKAP5	1.34033	1.37343	3.1646	0.00363691	-1.82897
RACGAP1	1.01513	3.52548	3.16396	0.00364285	-1.8423
DYRK2	0.874977	4.45033	3.16369	0.00364539	-1.91224
MCM6	0.676713	4.48107	3.15946	0.00368478	-1.9242
VEZT	0.516335	6.02965	3.15402	0.00373611	-2.01203
TRIP13	1.25787	2.08431	3.1485	0.00378884	-1.84301
GINS4	1.26295	1.13151	3.14251	0.00384688	-1.88315
UBE2Q1	0.356478	6.39685	3.13797	0.00389138	-2.05506
TIPRL	0.525941	5.37055	3.13335	0.00393728	-2.03783
ST3GAL1	1.09309	4.54495	3.12282	0.00404369	-2.01227
MTDH	0.678147	7.33036	3.12108	0.00406157	-2.08636
KIF14	1.89704	-0.268759	3.11867	0.00408633	-2.01822
NCAPG	1.51924	1.60903	3.11795	0.00409387	-1.91559
TMEM183A	0.498946	5.96377	3.11408	0.00413413	-2.10245
MTERFD1	0.637888	3.98742	3.11355	0.00413963	-1.98814
SPAG5	1.33531	2.79719	3.11101	0.00416626	-1.92567
CENPL	0.890687	1.97667	3.10924	0.00418502	-1.92572
ZNF92	0.740423	3.36999	3.10688	0.00421005	-1.95871
SDHC	0.419984	6.56484	3.10407	0.00424005	-2.13415
PARN	0.267191	5.70716	3.10331	0.00424817	-2.1196
TMEM194A	0.562362	4.31022	3.10228	0.00425924	-2.04018
TMEM170B	0.542943	3.66339	3.09986	0.00428534	-1.99341
C20orf103	1.73849	2.35903	3.09516	0.0043365	-1.95293
YY1	0.433309	5.89291	3.093	0.0043602	-2.14889
C3orf37	0.356765	5.4593	3.08917	0.00440245	-2.14267
CEP55	1.43089	0.733784	3.08456	0.00445394	-2.01562
MCM3	0.378393	5.88055	3.08332	0.0044679	-2.17067
PHF6	0.846929	5.14985	3.08165	0.00448671	-2.14521
2024-09-07	0.406165	6.689	3.08003	0.00450502	-2.18922
HSF2BP	0.953419	-0.443039	3.07764	0.00453225	-2.10702
KIF3C	0.789272	3.47697	3.07543	0.00455759	-2.03413
LLGL1	0.586728	5.14919	3.07392	0.00457491	-2.16273
TROAP	1.5486	0.891263	3.07378	0.00457651	-2.02896
PRC1	0.956006	3.5423	3.07167	0.00460082	-2.04677
E2F1	1.08807	2.38103	3.06945	0.00462669	-2.00674
IGF2	1.37008	4.61174	3.06922	0.0046293	-2.13838
CXCR7	1.12657	3.21128	3.06821	0.00464109	-2.03393
GPR137C	1.22826	0.79954	3.06782	0.00464568	-2.04476
SLC19A2	0.901469	5.05597	3.06781	0.00464582	-2.17137
PLS3	0.929483	5.69617	3.0643	0.004687	-2.20826
C8orf38	0.720602	3.24321	3.06341	0.00469742	-2.04603
RRM2B	0.698236	5.68445	3.05061	0.00485096	-2.23897
LOC220594	2.03641	-0.0592415	3.05051	0.00485211	-2.12771
GNAS	0.393895	9.98876	3.05005	0.00485776	-2.17566
EXO1	2.02472	-0.0569297	3.04305	0.00494382	-2.14129
ARHGAP11A	1.19153	1.98238	3.03895	0.00499489	-2.06963
BPGM	0.367636	4.41093	3.03606	0.00503115	-2.19685
PTPN12	0.635287	5.39353	3.03604	0.00503147	-2.26049
NUF2	1.54208	0.291696	3.03276	0.00507287	-2.13834
RGS4	1.26061	1.64009	3.03012	0.00510659	-2.09183
AUTS2	0.819853	5.03091	3.02821	0.00513101	-2.25928
MMD	0.706078	3.15105	3.02646	0.0051536	-2.12056
LIN9	0.677305	2.07746	3.02325	0.00519518	-2.10125
SQLE	0.996183	5.66983	3.02257	0.00520403	-2.30196
RAD54L	1.32273	0.415775	3.02116	0.00522233	-2.15319
KIF2C	1.4711	1.54115	3.02003	0.00523712	-2.11384
UBE2T	1.13392	1.83049	3.01811	0.00526236	-2.11324
AIDA	1.21016	5.91345	3.01421	0.00531389	-2.32859
SALL4	1.53469	-0.269624	3.0089	0.00538476	-2.2182
CDH7	1.55399	1.02625	3.00548	0.00543097	-2.15628
UBE2C	1.77099	1.73602	3.00439	0.00544577	-2.14193
LUZP6	0.476696	7.18424	3.00399	0.00545122	-2.35604
TFAP4	0.650459	3.91135	2.99155	0.00562291	-2.25149
ZNF286A	0.630426	3.36641	2.99125	0.00562712	-2.20913
CACYBP	0.556862	5.74544	2.99083	0.00563309	-2.37612
ZNF174	0.418771	4.04396	2.98957	0.00565077	-2.26769
ZNF461	0.862221	2.4576	2.98874	0.00566246	-2.17534
LMNB1	1.18877	3.79474	2.98862	0.00566409	-2.24781
NXT2	0.587869	3.78348	2.98648	0.00569438	-2.25152
TMEM68	0.511458	4.54551	2.98513	0.00571351	-2.32119
C16orf75	0.790946	2.37046	2.98172	0.00576226	-2.18833
NUSAP1	1.61213	2.53005	2.97998	0.00578724	-2.19497
C18orf1	0.770849	5.1282	2.97934	0.0057965	-2.37454
GOLGA7	0.412735	5.76151	2.97855	0.00580787	-2.40423
CORO1C	0.468353	6.02368	2.97298	0.00588881	-2.42427
NUP107	0.401286	4.77335	2.97275	0.00589226	-2.36617
SKA3	1.37106	0.765583	2.96933	0.00594259	-2.23524
TANK	0.486632	4.54339	2.96746	0.00597016	-2.36016
HPS3	0.460529	5.10555	2.96602	0.0059916	-2.40296
BMP8B	1.30428	1.43047	2.96491	0.0060081	-2.22497
KCTD5	0.493707	5.14599	2.96331	0.00603198	-2.41131
CPNE3	0.716022	7.6266	2.95854	0.00610391	-2.44745
CDON	1.1514	3.78106	2.95703	0.00612672	-2.31527
UNG	0.405026	5.31454	2.95397	0.00617349	-2.441
KIF20A	1.84197	1.3983	2.95354	0.00617995	-2.24785
RAD1	0.443399	4.92653	2.95119	0.00621615	-2.42476
UBE2V2	0.520718	5.29232	2.95038	0.00622867	-2.4479
PPP3R1	0.338842	6.13654	2.9493	0.00624526	-2.47983
ARPC5	0.446619	6.89167	2.94888	0.00625188	-2.48445
PCDHA6	1.7819	-0.430499	2.9487	0.00625465	-2.33705
TAF4	0.715279	4.3093	2.94561	0.00630262	-2.38821
CTNND2	1.21982	4.08409	2.94191	0.00636064	-2.37563
LTBP2	0.947969	6.03197	2.93785	0.00642494	-2.50309
CENPF	1.61943	3.12421	2.93656	0.00644549	-2.31014
SKP2	1.09079	2.04759	2.93644	0.00644735	-2.2772
POGK	0.493699	5.70063	2.93289	0.00650423	-2.50418
CDC20	1.60762	2.00047	2.93285	0.00650491	-2.28422
SYT4	3.3157	0.885105	2.93259	0.00650909	-2.30103
RAB6A	0.509975	7.45326	2.92831	0.00657826	-2.5196
UBAP2L	0.602511	7.31772	2.92736	0.0065937	-2.525
UBE2W	0.70271	5.02107	2.92539	0.00662592	-2.48805
UCP2	1.01875	4.96198	2.9248	0.0066356	-2.48554
THBS2	1.47502	4.76589	2.92447	0.00664086	-2.47243
DCP2	0.530129	5.12806	2.92209	0.00668016	-2.50181
C1orf96	0.758303	3.68638	2.9207	0.00670306	-2.38545
TCEB1	0.558128	4.96407	2.92062	0.00670444	-2.49491
APOBEC3B	1.15389	0.730096	2.91973	0.00671904	-2.33052
NCAPD2	0.544415	5.52275	2.91913	0.00672907	-2.52786
RNFT2	1.27267	0.210933	2.91647	0.00677332	-2.3582
PLK1	1.46747	1.75908	2.91594	0.00678216	-2.31794
POLE3	0.427753	6.04682	2.90816	0.00691365	-2.56951
DLGAP5	1.77586	0.629187	2.90784	0.00691899	-2.35645
C1orf198	0.451083	6.04664	2.90499	0.00696772	-2.57652
TERF1	0.509922	5.0524	2.90434	0.00697899	-2.53644
GAB1	0.762441	4.2513	2.90399	0.00698492	-2.47381
NEK2	1.89556	0.63477	2.90322	0.00699826	-2.36491
PAQR5	1.08361	-0.131418	2.90211	0.00701738	-2.402
CDCA8	1.10686	2.02343	2.90111	0.00703476	-2.34791
SYPL1	0.38172	7.22874	2.90013	0.00705158	-2.58741
FAM189B	0.515491	5.40063	2.89868	0.00707693	-2.56774
OTUD6B	0.841656	3.78007	2.89867	0.00707714	-2.44101
PTTG1	1.36326	1.93288	2.89636	0.00711742	-2.35683
DCLRE1B	0.782758	2.63153	2.89499	0.0071414	-2.37316
STAU2	0.724383	5.38575	2.89413	0.00715648	-2.57706
CDCA3	1.15751	1.25961	2.88488	0.00732103	-2.38352
ADAM12	1.50368	0.0317132	2.88137	0.00738443	-2.43081
MCM2	0.61612	5.06838	2.87899	0.00742773	-2.59315
CENPA	1.66448	-0.304187	2.8784	0.00743844	-2.45392
TTK	1.60712	1.62497	2.87763	0.00745259	-2.39385
PORCN	0.442583	3.39741	2.87486	0.00750348	-2.45913
2024-09-04	0.738111	2.14449	2.87158	0.00756407	-2.40831
FLJ23867	1.36298	3.6208	2.8647	0.0076927	-2.49923
CBX3	0.479452	6.88483	2.86258	0.00773263	-2.67609
SIAH1	0.373998	4.78928	2.86114	0.00775992	-2.61296
CEPT1	0.367144	4.83729	2.85591	0.00785999	-2.62796
ESPL1	1.52705	0.658848	2.85033	0.00796797	-2.46276
GPR126	1.57045	3.17178	2.85015	0.00797152	-2.49424
WDR82	0.439623	7.10185	2.84626	0.00804749	-2.70871
NDE1	0.497699	4.11509	2.84488	0.00807475	-2.58839
CELSR3	1.80941	2.51832	2.84426	0.00808706	-2.47252
RRM1	0.393817	5.96815	2.84026	0.00816639	-2.71721
ASPM	1.82887	1.10925	2.83675	0.00823658	-2.47788
TADA1	0.513878	3.95287	2.83618	0.0082481	-2.59098
ENSA	0.498198	7.70052	2.82893	0.00839517	-2.73161
OSBPL10	0.962837	4.89234	2.82861	0.0084018	-2.69128
FAM76A	0.378762	3.5529	2.82601	0.00845506	-2.5749
DPH3B	1.19843	-0.614265	2.82421	0.00849227	-2.5663
SH2D1A	1.96482	0.794537	2.82345	0.00850806	-2.50913
LSM14A	0.365103	7.11057	2.82208	0.00853638	-2.76149
BRIP1	1.53429	-0.295148	2.8206	0.00856715	-2.55532
SKA2	0.474213	4.58364	2.81682	0.00864643	-2.69239
CA3	2.14247	-0.229533	2.81677	0.00864749	-2.55881
CDKN2B	0.684369	3.13516	2.81669	0.00864911	-2.56105
C7orf68	0.551656	3.20388	2.81659	0.00865118	-2.56618
TTC21B	0.79216	5.17366	2.8165	0.00865322	-2.73582
CDKN3	1.49102	0.478628	2.81642	0.00865478	-2.53084
TMEM43	0.363884	6.53166	2.81345	0.00871755	-2.78513
NEK7	0.541336	5.6856	2.81019	0.00878682	-2.77362
RAE1	0.363231	4.88772	2.80884	0.00881576	-2.73372
PNMA2	1.42942	0.0807565	2.8057	0.00888324	-2.56459
PATL1	0.646225	4.98424	2.80364	0.00892775	-2.75174
FOXM1	1.18538	2.82078	2.80131	0.00897852	-2.57303
HUNK	1.2702	1.21621	2.80087	0.00898809	-2.54449
ELK1	0.510436	5.43067	2.80035	0.00899949	-2.78427
E2F2	1.26979	0.357635	2.79934	0.00902148	-2.56586
TPX2	1.50901	2.97272	2.79727	0.00906687	-2.59014
QSOX1	0.963377	6.19676	2.79653	0.0090832	-2.81795
C20orf72	0.443909	3.97797	2.79636	0.00908698	-2.67805
ARL8B	0.348411	6.59314	2.79617	0.00909118	-2.82297
ZNF143	0.43061	3.86064	2.7873	0.00928865	-2.68539
C12orf49	0.6334	3.99609	2.78487	0.00934364	-2.7042
STAG2	0.621084	7.04382	2.78409	0.00936121	-2.84537
TOP2A	1.77259	3.79351	2.78281	0.0093902	-2.68818
RMI1	0.805354	4.45914	2.78248	0.00939775	-2.75497
RB1CC1	0.674589	6.2326	2.78023	0.00944917	-2.854
USP39	0.268215	5.69074	2.77968	0.00946162	-2.83999
CEP78	0.56837	3.2474	2.77838	0.00949157	-2.64841
CKAP2L	1.69717	-0.375916	2.77333	0.00960804	-2.64171
RBL1	1.29206	1.48294	2.77075	0.00966817	-2.60048
PRKACA	0.284875	6.51137	2.76926	0.00970308	-2.88103
LOC595101	0.941921	1.59753	2.76899	0.00970932	-2.60409
PRR11	1.8748	-0.843815	2.76816	0.00972877	-2.67482
WDR47	0.625094	3.88864	2.76659	0.00976588	-2.73176
RNASEH2A	0.545407	3.80254	2.76515	0.0097999	-2.72611
CDC14A	0.76079	4.51973	2.76333	0.00984303	-2.80134
ELF4	1.02062	3.16882	2.76321	0.0098458	-2.67346
ZNF623	0.981608	4.27341	2.7612	0.00989357	-2.78241
APPL1	0.503828	6.09279	2.76087	0.00990144	-2.89296
ZNF197	0.387035	4.38421	2.75865	0.00995474	-2.79866
C7orf60	0.389486	3.77521	2.75675	0.0100005	-2.74095
GPSM2	0.718767	3.24978	2.75524	0.0100369	-2.69613
PARD6B	0.595858	2.64629	2.75484	0.0100466	-2.65777
CDK1	1.30089	2.59991	2.75365	0.0100755	-2.65793
SGPP2	1.36856	0.480748	2.75254	0.0101024	-2.64705
TNIK	1.09633	1.99172	2.751	0.01014	-2.64332
ZNF681	0.739252	2.50603	2.74306	0.0103357	-2.67481
CDH2	1.51141	1.41552	2.74227	0.0103553	-2.65448
MCM5	0.44052	4.94215	2.74049	0.0103998	-2.88433
TSEN15	0.435777	4.77505	2.73946	0.0104255	-2.87384
C11orf9	1.11875	-0.102146	2.73564	0.0105219	-2.69564
LAMB1	0.831724	5.74533	2.73533	0.0105296	-2.93749
ORC6L	1.17244	0.889922	2.73498	0.0105384	-2.67125
TEX10	0.389381	4.6095	2.73494	0.0105394	-2.86958
OSGEPL1	0.458005	2.87634	2.72944	0.0106797	-2.72157
BST1	1.08313	0.217633	2.72921	0.0106854	-2.69615
TLE4	0.865776	3.55659	2.72905	0.0106895	-2.77705
PTDSS1	0.59552	6.30225	2.72413	0.0108166	-2.97599
HABP4	0.468051	4.17529	2.72401	0.0108196	-2.85082
SET	0.394635	8.22653	2.72275	0.0108523	-2.94366
IL5RA	2.42765	-0.202742	2.72111	0.0108953	-2.72478
GTSE1	1.52258	0.973696	2.7208	0.0109033	-2.69645
ORC1L	1.04363	0.124605	2.72043	0.0109131	-2.71454
MYBL2	1.62707	2.15365	2.71954	0.0109363	-2.70841
CDKN2D	0.816753	2.44269	2.71913	0.010947	-2.71942
STK4	0.514625	5.04981	2.71825	0.0109701	-2.93907
RPL36A	1.1859	1.83929	2.71441	0.0110716	-2.71111
GPATCH2	0.560246	4.00046	2.71165	0.011145	-2.85823
RNF34	0.703131	4.50344	2.70739	0.0112592	-2.9182
GLYATL2	1.89996	0.143007	2.70709	0.0112674	-2.73752
DCK	0.681722	4.42234	2.70579	0.0113025	-2.91387
AZIN1	0.6558	7.67797	2.70235	0.0113957	-3.00514
KIAA1429	0.521544	5.9766	2.69767	0.0115238	-3.0254
APH1A	0.38095	7.81789	2.69694	0.011544	-3.01209
AHCTF1	0.496184	5.78699	2.69528	0.0115899	-3.02447
SIKE1	0.452162	4.97708	2.69364	0.0116355	-2.98625
GIT2	0.372186	5.40621	2.68957	0.011749	-3.02048
ZNF273	0.507721	2.28627	2.68574	0.0118569	-2.77854
C11orf82	1.19577	0.529616	2.68491	0.0118804	-2.76778
COMMD2	0.460241	4.69214	2.68478	0.011884	-2.98256
LBH	0.993822	6.94843	2.68237	0.0119524	-3.06514
UHRF1	1.49473	1.12543	2.68129	0.0119832	-2.76846
NRP1	1.05214	6.38709	2.67992	0.0120224	-3.07139
FOXD1	2.07239	1.32217	2.67985	0.0120244	-2.7713
MEX3A	1.57254	3.84622	2.67673	0.012114	-2.91411
LPIN1	0.419318	4.66289	2.67595	0.0121365	-2.99855
GDAP2	0.439051	4.25174	2.67528	0.0121559	-2.9605
GPR137B	0.801237	3.94154	2.67472	0.0121723	-2.92846
KCNK15	1.59752	-0.386512	2.67108	0.012278	-2.81767
CHML	0.79056	3.84419	2.66587	0.0124313	-2.93623
MMP11	1.10228	3.17562	2.66503	0.0124561	-2.87302
FGF13	0.682499	5.27335	2.66394	0.0124884	-3.0676
LMNB2	0.511475	5.8068	2.66363	0.0124974	-3.0922
GINS1	0.915468	1.72401	2.66285	0.0125208	-2.80717
SESTD1	0.520902	4.56744	2.66188	0.0125497	-3.01944
FAM18B	0.464017	5.37953	2.65732	0.0126863	-3.0872
C10orf119	0.385356	5.76384	2.65671	0.0127047	-3.10527
OAS3	1.19246	5.49415	2.65667	0.0127058	-3.09417
MCM10	1.51041	-0.396414	2.65576	0.0127333	-2.84403
ZNF425	0.581294	2.44149	2.65574	0.0127337	-2.84339
CRLF3	0.656444	3.44639	2.65383	0.0127916	-2.92005
ATXN7	0.652714	4.96306	2.65316	0.0128119	-3.07032
C6orf174	0.960168	1.1209	2.65109	0.012875	-2.82395
EXT1	0.54937	5.05103	2.64708	0.0129981	-3.08922
ANKRD13A	0.415414	5.66521	2.64585	0.013036	-3.12432
C8orf84	1.09063	2.63231	2.64304	0.0131229	-2.8781
TMPRSS4	2.15654	0.756585	2.64225	0.0131477	-2.84137
ADCY9	0.651387	4.09004	2.64153	0.0131701	-3.01298
CDKN2C	0.898687	3.39235	2.64114	0.0131822	-2.94047
FANCG	0.421958	3.66961	2.64106	0.0131848	-2.96844
AKR1C3	1.90188	2.50104	2.64055	0.0132004	-2.87582
SLC7A5	1.34455	3.66031	2.63886	0.0132536	-2.97193
C9orf30	0.375443	3.57579	2.63748	0.0132969	-2.96599
DPF2	0.248313	5.76979	2.63731	0.013302	-3.14627
MELK	1.6025	0.829458	2.63688	0.0133159	-2.85053
XYLB	0.783335	2.81527	2.63647	0.0133286	-2.90239
RAB22A	0.304542	5.54131	2.63419	0.0134007	-3.1435
CCDC109B	0.746467	1.55138	2.63354	0.0134214	-2.85943
PALM2	0.812446	-0.177621	2.63258	0.0134517	-2.87623
UBE2D2	0.317821	6.31844	2.63234	0.0134595	-3.17092
SCML2	0.704698	1.21974	2.63223	0.013463	-2.85878
RAB21	0.374323	5.6692	2.63047	0.0135191	-3.15674
PYGO2	0.356045	6.56684	2.62957	0.0135478	-3.179
TACC3	1.0806	3.50492	2.62929	0.0135568	-2.97534
PNMA1	0.676146	5.75474	2.62891	0.013569	-3.16333
TIGD7	0.447422	4.30362	2.62547	0.0136797	-3.06894
TCF19	0.612245	3.79932	2.62529	0.0136854	-3.01427
MAPK9	0.428567	6.03992	2.62522	0.0136876	-3.18011
BARD1	1.63935	1.04181	2.62416	0.0137219	-2.87299
PRCC	0.441782	6.23979	2.624	0.0137274	-3.18715
DEPDC1B	1.26284	0.250887	2.62238	0.0137799	-2.88344
STRBP	0.461375	5.43585	2.62153	0.0138074	-3.165
CLDN7	1.06314	6.83063	2.62117	0.0138193	-3.19567
PPARG	1.11721	1.70841	2.61988	0.0138613	-2.88752
TRIM32	0.827784	4.08812	2.61926	0.0138815	-3.05842
KIF4A	1.70748	1.76269	2.61924	0.0138821	-2.88985
ESRP1	0.574037	7.01238	2.61727	0.013947	-3.20137
KIFAP3	0.396418	4.87933	2.61663	0.0139681	-3.14012
CHN1	0.713635	3.24037	2.61453	0.0140374	-2.97958
HNRNPU	0.330875	9.02722	2.61135	0.0141428	-3.15235
LSM14B	0.393187	5.95114	2.60898	0.0142221	-3.2116
SUZ12	0.535541	5.42898	2.60556	0.0143371	-3.19794
HIATL2	0.795976	0.651126	2.60419	0.0143834	-2.91013
UBTD2	0.362251	4.84559	2.60387	0.0143939	-3.16386
IPO9	0.438458	6.2936	2.60079	0.0144986	-3.23655
PDE4DIP	0.605326	5.80775	2.59713	0.0146241	-3.23158
VMA21	0.319466	5.50962	2.59442	0.0147174	-3.22495
IQCB1	0.465934	4.67366	2.59423	0.0147239	-3.16917
LPGAT1	0.776878	5.95705	2.59279	0.0147739	-3.24548
NCAPG2	0.812414	3.70331	2.59237	0.0147884	-3.07042
BMP6	1.44948	2.94029	2.59236	0.0147886	-2.99798
CDV3	0.389206	6.75858	2.59186	0.0148063	-3.25747
ADD3	0.835472	5.61567	2.58983	0.0148768	-3.23921
ZNF260	0.605971	4.94218	2.58923	0.0148979	-3.2016
KIF11	0.947262	2.79594	2.58781	0.0149475	-2.99618
ELMO1	0.619508	3.1625	2.58675	0.0149847	-3.02757
CTTNBP2NL	0.730387	5.29117	2.58673	0.0149853	-3.22967
ARNT	0.409541	5.66609	2.58446	0.0150654	-3.25244
NUDCD1	0.5183	4.1089	2.58366	0.0150935	-3.13325
POLQ	1.30916	-0.149305	2.58182	0.0151588	-2.96174
ARRDC3	0.838214	6.30145	2.58076	0.0151966	-3.27832
ARL8A	0.369584	6.02099	2.58068	0.0151996	-3.27244
MOBKL2B	0.703814	2.39704	2.58025	0.0152147	-2.9866
EIF1AX	0.328422	6.48145	2.57925	0.0152505	-3.28355
MARCKS	0.51979	7.68858	2.57906	0.0152573	-3.26354
STX2	0.56272	2.92422	2.57885	0.0152649	-3.02313
GSTM1	3.06327	0.934493	2.57666	0.0153433	-2.95839
DHFR	0.729005	3.16385	2.57398	0.0154398	-3.05282
ZBTB41	0.687138	4.90728	2.57196	0.0155131	-3.23445
FAM134B	0.770623	4.8161	2.57037	0.0155708	-3.23042
SLC6A6	0.714671	3.68225	2.57014	0.015579	-3.11269
TBX19	0.788914	0.913242	2.56869	0.015632	-2.97256
CENPE	1.17165	1.68923	2.56819	0.0156503	-2.98307
CCNA2	1.01348	1.89486	2.5678	0.0156646	-2.98942
C19orf57	1.00255	0.318393	2.56316	0.0158355	-2.9852
LIN54	0.481039	3.80287	2.56257	0.0158573	-3.14121
SPARC	0.754679	8.758	2.56231	0.015867	-3.26206
RRM2	1.46047	2.73817	2.56005	0.0159508	-3.04586
H19	1.57019	3.09137	2.55968	0.0159645	-3.07439
IGDCC4	0.842523	-0.841927	2.55889	0.0159941	-3.02047
C17orf39	0.478031	4.45636	2.55843	0.0160115	-3.22178
IRF2BP2	0.451518	7.4716	2.55672	0.0160753	-3.31644
IFT52	0.329014	4.7672	2.55542	0.0161241	-3.25686
NCBP1	0.415321	5.44093	2.55514	0.0161349	-3.30275
FGD6	0.778184	3.47009	2.55394	0.0161801	-3.12222
C20orf111	0.313384	5.23364	2.55038	0.0163148	-3.30113
MBLAC2	0.893481	3.41308	2.5494	0.0163521	-3.12529
C7orf28B	0.468939	4.70977	2.54936	0.0163537	-3.26423
KIAA0101	1.07074	1.58065	2.54693	0.0164465	-3.01968
ISY1	0.318564	4.84885	2.54631	0.0164703	-3.2823
PLCE1	0.929106	2.49956	2.54619	0.0164748	-3.05712
GLE1	0.370729	5.47573	2.54551	0.0165009	-3.32422
TRPS1	0.681139	4.69916	2.5452	0.0165128	-3.27175
MCF2L2	1.38537	-0.48537	2.54446	0.0165412	-3.0328
CHORDC1	0.636652	4.7435	2.54256	0.0166147	-3.28102
RAP1A	0.481738	5.93007	2.54132	0.0166627	-3.35099
C1orf43	0.395702	8.08199	2.5406	0.0166906	-3.32914
DR1	0.434312	5.64482	2.53883	0.0167595	-3.34559
YBX1	0.337022	8.25814	2.53825	0.016782	-3.32787
PTK2	0.514443	6.82003	2.53821	0.0167836	-3.36786
SLMO2	0.520426	6.06282	2.53716	0.0168245	-3.36329
FOXN2	0.731702	4.03625	2.5347	0.0169211	-3.22371
HAUS6	0.510523	4.02491	2.53443	0.0169319	-3.22295
SYTL2	0.975401	5.35207	2.53402	0.0169478	-3.34136
DENND5A	0.446276	5.83612	2.53164	0.0170421	-3.36771
CSE1L	0.34514	6.72018	2.52998	0.0171077	-3.38551
TTC9C	0.342252	3.67457	2.52931	0.0171343	-3.19307
CDCA5	1.05476	2.32458	2.52931	0.0171344	-3.07935
PPP2R5A	0.382432	5.71297	2.52907	0.0171442	-3.36836
OSBPL3	0.855398	1.74768	2.52798	0.0171875	-3.05856
DEDD	0.317765	5.28529	2.52754	0.017205	-3.35087
MATN3	1.10114	0.82106	2.52551	0.0172863	-3.04873
IRF8	1.0873	3.00221	2.52383	0.0173538	-3.13626
ABI3BP	0.875797	3.04302	2.52272	0.0173984	-3.14196
SH3KBP1	0.578242	4.09433	2.52137	0.0174531	-3.25709
LPPR4	1.17942	-0.0855626	2.52085	0.0174742	-3.0631
CCDC109A	0.351774	4.18964	2.52069	0.0174804	-3.26935
CNIH2	0.923251	-1.01726	2.5196	0.0175247	-3.08962
CAMSAP1L1	0.535003	5.5257	2.51894	0.0175517	-3.38091
RBBP5	0.727911	4.4213	2.51636	0.0176568	-3.30323
PCNA	0.41061	5.69239	2.51502	0.0177119	-3.3962
CXADR	1.05119	4.7296	2.51447	0.0177344	-3.33674
PRKAG2	0.488259	5.63079	2.51261	0.0178108	-3.39854
ZNF200	0.443244	3.33805	2.51173	0.0178473	-3.19147
ZXDC	0.372404	5.90426	2.50964	0.0179335	-3.41493
KNTC1	0.746042	2.9336	2.5089	0.0179646	-3.15917
NCAPH	1.42444	1.0793	2.50768	0.0180154	-3.08216
ZFP82	0.554981	2.57471	2.50759	0.0180192	-3.13498
DNAJC9	0.311577	4.70908	2.50711	0.0180388	-3.34976
B4GALT5	0.417498	5.92688	2.5068	0.018052	-3.42146
C3orf38	0.46921	4.33738	2.50673	0.0180547	-3.31367
SHCBP1	1.32503	0.524857	2.50483	0.0181344	-3.08447
F5	1.58372	5.90687	2.5046	0.0181442	-3.4253
ORC4L	0.377288	5.0058	2.50438	0.0181534	-3.37963
RCOR3	0.554216	5.65193	2.50363	0.0181847	-3.4177
ABCB10	0.508971	4.48299	2.50296	0.018213	-3.3365
PPP1R9B	0.503009	5.8743	2.5024	0.0182366	-3.42868
RPRD1B	0.50979	5.87125	2.50197	0.0182545	-3.42944
GTF2E1	0.451676	3.61312	2.50196	0.0182552	-3.24013
PPFIA2	2.41749	0.92228	2.49969	0.0183512	-3.09469
COL3A1	1.0201	8.64286	2.49849	0.0184018	-3.39573
NUP50	0.335469	6.01615	2.49789	0.0184273	-3.44222
BBC3	0.602787	2.35569	2.49763	0.0184384	-3.14041
SLC2A6	0.803361	1.03498	2.49559	0.0185257	-3.10301
ZNF131	0.444272	4.60596	2.49145	0.0187034	-3.37168
ZNF667	0.662432	3.0203	2.48972	0.018778	-3.20345
RALA	0.355113	5.49565	2.48939	0.0187923	-3.43946
RASAL2	0.966297	4.73753	2.48839	0.0188357	-3.38994
LOC338651	1.68443	-0.800157	2.4856	0.0189572	-3.13698
BFAR	0.23437	5.67977	2.48356	0.0190463	-3.45952
RSBN1L	0.586966	4.05388	2.47733	0.0193215	-3.33989
FAM126A	0.64823	3.38953	2.47668	0.0193506	-3.26494
DRAM1	0.637574	3.88408	2.47597	0.0193823	-3.32243
SUMO2	0.334795	7.21258	2.47171	0.0195731	-3.49661
C1orf103	0.493697	4.45728	2.46858	0.0197139	-3.40251
WDHD1	0.888475	1.85188	2.46752	0.019762	-3.17231
C1orf226	0.792873	4.10686	2.46399	0.0199231	-3.37246
ADA	0.726347	1.18771	2.46396	0.0199242	-3.16099
PEA15	0.352815	7.74682	2.46328	0.0199555	-3.49775
DEPDC1	1.65281	1.77203	2.46254	0.0199891	-3.17843
DEK	0.407589	6.57781	2.461	0.0200598	-3.52586
GNA13	0.466765	5.91307	2.45988	0.0201115	-3.51595
OCLN	1.17291	4.16585	2.45837	0.0201812	-3.39046
PKMYT1	1.35138	1.63691	2.45802	0.0201974	-3.18218
TRAM1	0.460486	7.76577	2.45793	0.0202017	-3.50783
ACVR1	0.444333	4.92862	2.45755	0.0202192	-3.46779
MORF4L2	0.378807	7.92231	2.45754	0.0202199	-3.50307
FAM65B	1.47165	2.95215	2.45545	0.020317	-3.26268
WWP1	0.56176	6.70428	2.45353	0.0204064	-3.54083
BEND7	0.88543	3.07436	2.4525	0.0204544	-3.27949
GIMAP2	0.704459	2.5293	2.44964	0.0205887	-3.24061
FIGNL1	0.509611	3.14701	2.44681	0.0207227	-3.29737
KIF18A	1.18219	-0.0250441	2.44677	0.0207246	-3.18559
KIF18B	1.53874	0.147813	2.44654	0.0207354	-3.1847
CEP57	0.510082	5.16081	2.44378	0.0208665	-3.51207
RAD23B	0.458689	7.95991	2.44333	0.0208882	-3.53017
BCL7A	0.591407	4.72562	2.43989	0.021053	-3.48562
CEP152	0.769646	0.814851	2.43742	0.0211721	-3.2019
THAP5	0.408454	4.86758	2.43725	0.0211803	-3.50324
C5orf34	0.710532	0.414383	2.43705	0.02119	-3.20009
RFC2	0.463558	4.6184	2.43651	0.0212162	-3.48226
TSC22D2	0.608044	4.22109	2.43635	0.0212236	-3.4402
IL18	0.92881	1.80105	2.43572	0.0212545	-3.22783
C9orf5	0.574339	7.09385	2.43569	0.0212559	-3.57155
MAPK4	1.02119	3.7095	2.43459	0.021309	-3.38251
RAB12	0.440063	4.44181	2.43385	0.0213451	-3.4696
C8orf73	1.05884	0.903223	2.43306	0.0213839	-3.21048
ZNF606	0.383445	4.30104	2.43303	0.0213854	-3.45584
SERPINI1	0.729291	2.97974	2.4323	0.021421	-3.30892
RPA2	0.266195	5.53766	2.43214	0.0214287	-3.55642
PKIA	0.80079	4.1357	2.4294	0.0215632	-3.44378
C12orf65	0.379853	4.19402	2.42752	0.0216553	-3.45434
R3HDM1	0.494229	4.93678	2.42688	0.0216873	-3.52942
LOC100128191	0.629019	0.818577	2.42583	0.021739	-3.22185
ZNF107	0.74651	3.4408	2.42525	0.0217678	-3.36953
CDYL	0.401053	4.28668	2.4251	0.021775	-3.46975
DENND5B	0.656185	3.23084	2.42311	0.0218741	-3.35094
USP1	0.378757	5.46742	2.42307	0.0218761	-3.57103
ADAR	0.537645	8.63411	2.42298	0.0218807	-3.5471
COL1A1	0.971284	8.53176	2.42176	0.0219413	-3.55299
CERKL	0.925146	0.365998	2.42168	0.0219457	-3.22587
FAM64A	1.16653	0.429599	2.42149	0.0219552	-3.22634
DLEU2	0.803917	-0.0563424	2.42088	0.0219854	-3.22846
C1orf25	0.417552	4.28788	2.41966	0.0220465	-3.48054
C9orf100	0.820674	0.992233	2.41695	0.0221831	-3.23963
LAPTM4B	0.959854	5.18843	2.41532	0.0222652	-3.5704
IMPA1	0.823966	4.80105	2.41469	0.0222971	-3.54216
WNT7B	0.824588	4.74602	2.41309	0.0223784	-3.54039
NHSL1	1.21033	3.29995	2.41153	0.0224578	-3.38023
CLCN4	0.972468	2.58916	2.40911	0.0225818	-3.31994
SRPK1	0.502374	5.43006	2.40867	0.0226041	-3.59766
PALM2-AKAP2	0.697388	4.83483	2.40816	0.0226303	-3.55796
VAV3	0.751962	2.4143	2.40676	0.0227022	-3.31208
PLEKHA5	0.442764	5.17937	2.40641	0.0227204	-3.58743
DNMT1	0.548762	5.238	2.40505	0.0227907	-3.59384
VSIG10	0.384261	4.87831	2.40478	0.0228044	-3.56827
NCK1	0.563926	4.70384	2.40413	0.0228383	-3.55415
POLA2	0.394452	3.68718	2.40233	0.0229319	-3.44201
ASPH	0.849733	6.09193	2.40206	0.0229458	-3.63659
PRKAR2B	0.652258	4.69522	2.40203	0.0229475	-3.55747
POLR3G	0.926268	0.829659	2.40186	0.0229563	-3.26303
LYPD6B	0.918633	2.66517	2.40151	0.0229744	-3.33972
ALDH1A1	1.32824	5.89845	2.40086	0.0230084	-3.63325
ZNRF2	0.509139	4.22317	2.40085	0.0230088	-3.50978
PIF1	1.04744	-0.45397	2.40078	0.0230125	-3.26524
SNX16	0.715328	3.71299	2.3991	0.0231002	-3.45129
C21orf45	0.383572	3.326	2.39853	0.0231301	-3.40769
ZNF823	0.515355	2.6713	2.39616	0.0232548	-3.35008
MDGA1	1.13497	2.5997	2.39551	0.0232887	-3.34577
C1orf156	0.456094	2.95005	2.39471	0.0233311	-3.37667
TMEM59L	0.965116	1.01747	2.39428	0.0233536	-3.27912
POLD3	0.371791	3.74158	2.3922	0.0234639	-3.46796
LRRN1	1.31748	4.6531	2.39037	0.0235614	-3.57628
SEMA5B	1.30236	-0.391771	2.39035	0.0235624	-3.2811
GDPD1	1.24005	2.49224	2.39009	0.0235764	-3.3479
RNF138	0.541666	4.65536	2.38848	0.0236623	-3.58019
MAPKAPK2	0.428869	6.42086	2.38703	0.0237397	-3.67235
ITGA11	1.1971	3.44597	2.38587	0.0238025	-3.4451
STAU1	0.274977	7.37677	2.38529	0.0238334	-3.66481
YY1AP1	0.279893	6.45778	2.38437	0.0238829	-3.67796
LAMC1	0.676066	7.57101	2.38433	0.0238851	-3.66081
DCAF13	0.473449	5.39087	2.38318	0.0239472	-3.64582
KCMF1	0.240487	5.77681	2.38317	0.0239478	-3.66376
ZNF416	0.386421	2.73249	2.38293	0.0239612	-3.37942
ZNF518B	0.620764	5.03473	2.38283	0.0239662	-3.6237
CXorf56	0.41208	3.20458	2.38269	0.0239741	-3.42449
GABPB2	0.623316	2.39322	2.38247	0.0239856	-3.355
EIF4ENIF1	0.226785	4.91963	2.3819	0.0240169	-3.61656
TK1	0.982677	3.53044	2.38137	0.0240454	-3.46341
WASL	0.387247	6.56792	2.38063	0.0240856	-3.68604
PSMD12	0.354964	5.02739	2.37931	0.0241574	-3.63004
EYA2	0.598922	5.77543	2.37923	0.0241619	-3.67146
UCHL5	0.606024	4.48806	2.3764	0.0243167	-3.58685
NUDT17	0.799043	0.163543	2.37638	0.0243177	-3.30072
KIAA0196	0.612907	5.84895	2.37359	0.0244716	-3.6853
HNRNPK	0.379102	9.27711	2.37356	0.024473	-3.62237
KIAA1191	0.302178	6.97126	2.37101	0.0246139	-3.70204
TMEM37	0.88572	1.33832	2.36998	0.0246711	-3.32871
C1orf58	0.932589	3.47825	2.3697	0.0246869	-3.4794
C16orf72	0.264059	5.79738	2.36879	0.0247376	-3.69282
BTBD10	0.318268	4.71982	2.36688	0.0248442	-3.62836
SMC2	0.69847	4.34159	2.36481	0.0249603	-3.59325
IMMT	0.226218	6.26155	2.36445	0.0249804	-3.7145
SEC14L1	0.481002	6.13564	2.36329	0.0250455	-3.71408
ZNF548	0.41922	3.75235	2.36305	0.0250594	-3.5249
C1QTNF3	1.75114	2.93821	2.36282	0.0250723	-3.43476
RYK	0.359132	6.03077	2.36261	0.0250842	-3.71269
DDX6	0.351348	7.42776	2.36195	0.0251216	-3.70923
CABYR	0.710401	-0.265023	2.35989	0.0252383	-3.32861
GEMIN5	0.440735	5.04813	2.35981	0.0252425	-3.66964
RAP2A	0.486532	4.72735	2.35923	0.0252757	-3.64391
RBMX	0.299879	7.3735	2.3586	0.0253112	-3.71733
THAP2	0.588586	2.54737	2.35743	0.0253782	-3.41146
KIAA1715	0.623432	4.82391	2.35738	0.0253811	-3.65626
NSMCE2	0.483031	3.72477	2.35557	0.0254843	-3.53571
PRKCA	0.611121	5.01222	2.35257	0.0256564	-3.68104
DYNLT3	0.551916	5.00585	2.3521	0.0256839	-3.68148
TOR1AIP2	0.811106	3.55144	2.34916	0.0258537	-3.52676
SLC41A2	0.907734	2.07147	2.34769	0.0259388	-3.39784
CNIH4	0.540001	4.83449	2.34753	0.0259486	-3.67628
WDR26	0.440732	6.94795	2.34382	0.0261649	-3.75566
HS2ST1	0.571786	5.89895	2.34293	0.0262171	-3.74703
NAA50	0.411191	7.05633	2.34236	0.0262506	-3.75662
INTS8	0.528641	5.30578	2.3423	0.0262545	-3.72085
RPS6KA5	0.843675	2.84453	2.34105	0.0263278	-3.46608
CCDC43	0.329887	4.62639	2.33916	0.0264399	-3.673
SMARCE1	0.332399	7.21439	2.33733	0.0265485	-3.763
ELOVL6	0.881662	3.68603	2.33724	0.0265534	-3.56556
DIAPH3	1.16853	-0.00233461	2.33648	0.0265988	-3.3654
PCDHB2	1.14131	2.93661	2.33606	0.0266239	-3.48388
PCNP	0.366185	6.8953	2.33514	0.0266785	-3.77335
FNTA	0.468106	6.3621	2.33454	0.0267146	-3.77456
FAM199X	0.546642	4.94558	2.33241	0.0268419	-3.71481
SESN3	1.31871	2.66499	2.33201	0.026866	-3.4669
BUB1B	1.12492	1.78747	2.3312	0.0269145	-3.41248
ARHGEF11	0.543453	5.80639	2.33119	0.0269155	-3.76653
SLCO5A1	1.05612	2.68791	2.33117	0.0269167	-3.47034
WNT3	0.832221	-0.359973	2.33115	0.026918	-3.37479
CCNE1	0.68327	0.752312	2.33027	0.026971	-3.38263
HJURP	1.27092	1.42199	2.33002	0.0269858	-3.40029
FAM91A1	0.646714	5.85026	2.32997	0.0269887	-3.77051
LUM	0.915708	6.87813	2.32982	0.026998	-3.78393
TAF9B	0.314149	5.54581	2.32941	0.0270224	-3.7587
XPO1	0.409391	7.16239	2.32904	0.0270452	-3.78033
WHSC1	0.59291	5.81532	2.32845	0.0270806	-3.77217
MAFB	0.658128	4.87826	2.32829	0.0270901	-3.71716
FAP	1.12787	1.74962	2.32775	0.0271233	-3.41681
CABLES2	0.506494	3.54698	2.32641	0.0272044	-3.5689
ARMC1	0.502849	5.0143	2.32587	0.0272372	-3.73285
MGC57346	0.430752	3.69223	2.32564	0.0272515	-3.58816
SCAI	0.475963	3.77209	2.32522	0.0272769	-3.59889
MTMR11	0.669411	2.14516	2.32485	0.0272995	-3.44266
TOP2B	0.388875	7.76147	2.32424	0.0273366	-3.77157
RAD54B	0.766858	1.70517	2.32386	0.0273596	-3.42164
ATG12	0.322014	4.47831	2.32364	0.0273733	-3.68746
TUBA1B	0.408631	8.674	2.32351	0.0273808	-3.74008
KALRN	0.686521	3.67007	2.32215	0.0274641	-3.59194
C1orf109	0.521782	4.34954	2.32111	0.0275281	-3.67797
ZCCHC7	0.321756	4.26068	2.31887	0.0276657	-3.67183
TRIM25	0.603863	5.41747	2.31796	0.0277224	-3.77428
EPC2	0.494836	4.90447	2.3179	0.027726	-3.73936
RP2	0.556754	4.16448	2.31731	0.0277621	-3.66314
SOCS6	0.390975	4.8437	2.31547	0.0278766	-3.73884
PHF13	0.32598	4.92166	2.31524	0.0278906	-3.74589
FXYD5	0.620901	4.59762	2.31439	0.0279435	-3.7176
VAMP4	0.315251	4.02319	2.31162	0.0281167	-3.65625
FUS	0.400483	7.66447	2.31157	0.0281198	-3.7995
RHOT1	0.330484	5.25518	2.31034	0.0281969	-3.77949
HDAC9	1.1829	3.61246	2.30857	0.0283082	-3.61021
TMEM128	0.34608	4.73648	2.30855	0.0283094	-3.74232
GDF9	0.668766	-0.0912606	2.3082	0.0283315	-3.41053
C5orf25	0.389741	3.80192	2.30786	0.0283531	-3.63523
NUFIP2	0.416365	6.64964	2.30759	0.0283701	-3.82868
SP3	0.532555	6.24152	2.30736	0.0283843	-3.82524
OXR1	0.584843	5.07342	2.30697	0.0284088	-3.7736
NFYB	0.341208	5.36619	2.30546	0.0285043	-3.79548
MSL2	0.347632	5.214	2.30428	0.0285791	-3.78848
WIZ	0.353184	6.20803	2.30406	0.0285937	-3.83092
TMEM70	0.421284	4.61003	2.30394	0.0286012	-3.73881
EIF3H	0.417437	7.77134	2.30385	0.0286068	-3.81055
CKS1B	0.5286	3.761	2.30358	0.0286242	-3.63809
SPPL3	0.293245	6.05605	2.30351	0.0286282	-3.82825
GTDC1	0.721689	3.60695	2.30161	0.0287493	-3.62248
PCMTD2	0.458032	6.28148	2.30074	0.0288051	-3.83873
ZFP14	0.527001	3.48293	2.30063	0.0288119	-3.60911
CPSF6	0.341282	6.35014	2.30021	0.0288388	-3.84085
NFS1	0.265475	5.05194	2.29981	0.0288646	-3.78573
HPSE	1.16196	-0.404594	2.2997	0.0288715	-3.4243
GRHL3	0.979421	0.904053	2.29867	0.0289381	-3.43852
ADD2	1.46671	0.687404	2.29667	0.0290669	-3.43716
UTP23	0.538078	4.35318	2.29321	0.0292908	-3.73136
IGFBP3	0.948007	6.39321	2.29251	0.0293363	-3.85626
H2AFZ	0.445053	6.76024	2.29219	0.0293569	-3.85786
WDR76	0.659516	1.67541	2.28864	0.0295888	-3.48121
EIF4E3	0.42638	5.0954	2.28781	0.0296431	-3.81185
UBE2E3	0.486813	5.81542	2.28752	0.0296621	-3.85108
ENOX2	0.384166	4.11202	2.28619	0.02975	-3.71533
CLSPN	1.65162	-0.972251	2.28589	0.0297694	-3.45025
MED28	0.348924	4.69073	2.28559	0.0297892	-3.78169
KIAA1949	0.485213	4.91435	2.28517	0.0298175	-3.80276
EXOSC3	0.295223	4.04074	2.28451	0.0298606	-3.70944
FBLN2	0.812584	5.36441	2.28283	0.0299718	-3.83873
KPNA2	0.745511	4.8025	2.28254	0.0299915	-3.79799
PTGFR	1.63401	0.884964	2.2825	0.0299939	-3.46492
CNST	0.420819	5.17386	2.2817	0.0300469	-3.82901
PLXNA1	0.542333	5.61028	2.28076	0.0301098	-3.85538
CHCHD3	0.307366	5.04831	2.27883	0.0302387	-3.82549
FCHSD2	0.446479	4.26289	2.27847	0.0302624	-3.74846
ZNF12	0.336817	5.09532	2.27581	0.030441	-3.8347
ZNF639	0.331456	5.15841	2.27508	0.0304898	-3.84055
TXNRD1	0.535011	6.41343	2.27423	0.0305477	-3.89154
PCDHB7	0.854994	1.74864	2.2739	0.0305699	-3.50991
ZHX1	0.657033	5.66138	2.26885	0.0309123	-3.8804
HDGF	0.340949	7.79095	2.2677	0.0309911	-3.87899
NFYA	0.44556	5.47869	2.26748	0.031006	-3.87423
ZNF630	0.54069	2.25389	2.26655	0.0310695	-3.55234
ZNF836	0.382867	2.76896	2.26608	0.0311018	-3.59469
C21orf91	0.407804	3.67786	2.26576	0.0311236	-3.69777
CDC42	0.280978	7.75399	2.26534	0.0311529	-3.88484
POFUT1	0.357781	6.46371	2.26459	0.0312044	-3.91044
DNASE1L3	0.924561	0.192903	2.26437	0.0312193	-3.48208
ZNF267	0.484218	3.06201	2.26351	0.0312784	-3.6287
RMND5A	0.365147	6.40061	2.26333	0.0312908	-3.91219
COIL	0.271674	4.51081	2.26229	0.0313631	-3.80728
ISG20L2	0.501114	5.06267	2.26225	0.0313657	-3.85801
ANKRD57	0.425545	4.58863	2.26182	0.0313956	-3.81636
ECT2	0.898465	4.06433	2.26139	0.0314247	-3.75563
FPR3	0.969623	2.45376	2.26111	0.0314444	-3.57661
NUP62CL	0.74963	0.198086	2.25933	0.0315679	-3.49016
YWHAG	0.430987	7.82009	2.25853	0.0316236	-3.89534
CASP2	0.682213	4.81774	2.25816	0.0316494	-3.84549
CLIP1	0.60376	6.78912	2.25717	0.0317185	-3.9246
KLHL24	0.495999	5.79564	2.25624	0.0317834	-3.90999
GLCCI1	0.518346	3.7672	2.25547	0.0318375	-3.72819
TMEM97	0.457874	5.36506	2.25489	0.0318782	-3.89189
LPAR5	0.877263	0.497133	2.25372	0.0319598	-3.50362
RHOF	0.966059	1.26047	2.25293	0.032016	-3.52547
BCAS4	0.594853	4.39824	2.25232	0.0320586	-3.81342
FBXO28	0.516973	5.88575	2.25076	0.0321688	-3.92374
WDR67	0.637862	2.70822	2.25054	0.0321843	-3.61678
NEK4	0.538682	4.64642	2.25004	0.0322195	-3.84438
DCAF10	0.364432	5.62643	2.24945	0.0322618	-3.91567
MYNN	0.391448	4.22633	2.24909	0.0322871	-3.79898
PDP1	0.511394	5.2421	2.24753	0.0323982	-3.89831
FAM60A	0.462296	5.96124	2.24661	0.0324632	-3.93414
PPP1R8	0.239879	5.58935	2.24652	0.0324698	-3.91947
UBE3C	0.460221	6.66037	2.24527	0.0325592	-3.9479
EPPK1	1.27622	3.99974	2.24387	0.0326593	-3.77978
LOC642852	0.735234	3.39305	2.24381	0.0326637	-3.70243
ZWINT	0.768501	3.22249	2.2432	0.0327076	-3.6833
GATAD2B	0.421516	5.26668	2.24255	0.0327538	-3.90926
RTTN	0.676132	2.71194	2.2415	0.0328297	-3.63314
ABHD15	0.453932	3.63395	2.23927	0.0329902	-3.7408
SIP1	0.432118	2.58165	2.23741	0.0331249	-3.62878
SEC23A	0.47136	5.31456	2.23699	0.0331555	-3.92269
DCUN1D1	0.571175	4.50448	2.23637	0.0332008	-3.85509
FAM110B	0.968107	4.54719	2.23615	0.033217	-3.86011
CARD6	0.652534	1.58522	2.23033	0.0336429	-3.57636
CCDC93	0.422741	4.54008	2.23003	0.0336651	-3.87075
RAD51AP1	0.948476	1.4947	2.22876	0.0337582	-3.57502
AP1S2	0.509395	3.22452	2.22843	0.033783	-3.71012
KIF20B	0.645125	2.47817	2.22813	0.033805	-3.63639
FRS2	0.498683	4.92631	2.22809	0.0338081	-3.91143
BBS9	0.327253	3.59543	2.22467	0.0340616	-3.76248
ZFP28	0.394591	3.36731	2.22406	0.034107	-3.73502
ZNF654	0.506392	4.33449	2.22336	0.0341593	-3.85984
FAM55C	0.589021	4.02403	2.22278	0.0342027	-3.82182
ATP2B1	0.515275	5.64304	2.22124	0.0343183	-3.96959
MBD4	0.273663	4.92664	2.22122	0.0343196	-3.92429
ERCC6L	1.02604	0.487683	2.22034	0.0343858	-3.55705
INCENP	0.695466	3.45387	2.21907	0.034481	-3.75471
ZNF195	0.353805	4.24766	2.21784	0.0345734	-3.85949
RSBN1	0.371022	5.00771	2.21783	0.0345741	-3.93725
MED14	0.643312	5.90984	2.21608	0.0347069	-3.98999
GATAD2A	0.367111	6.00546	2.21301	0.0349394	-3.99881
TUBB	0.365554	9.20037	2.21193	0.035022	-3.9328
MTBP	0.884104	0.945396	2.21064	0.035121	-3.58469
TAF1A	0.548331	1.79801	2.20915	0.0352349	-3.62265
ZFAND1	0.520733	5.36898	2.20907	0.0352411	-3.97823
CNOT8	0.310046	5.90408	2.20883	0.0352594	-4.00336
AP3S1	0.355966	5.28264	2.20836	0.0352952	-3.97435
SNX12	0.428219	3.57572	2.20816	0.0353113	-3.78988
RBM28	0.399999	4.03756	2.20797	0.0353254	-3.85075
PGGT1B	0.329073	4.60468	2.20614	0.0354666	-3.92187
HP1BP3	0.323469	7.45065	2.20274	0.0357298	-4.01318
C9orf40	0.510292	1.98012	2.20194	0.0357922	-3.64558
SLBP	0.372136	5.481	2.20186	0.0357983	-3.99787
CDCA2	1.30542	-0.246088	2.20132	0.0358408	-3.57657
TPPP	0.717497	3.4387	2.20057	0.0358991	-3.78612
TOR3A	0.352244	5.65809	2.2	0.0359438	-4.00999
SPINK5	1.59307	-0.850313	2.19935	0.0359938	-3.57837
GNAI3	0.275846	6.61806	2.19873	0.0360426	-4.03548
FAM116A	0.274999	4.72148	2.19786	0.0361106	-3.94895
CMPK2	0.847807	2.7369	2.19772	0.0361217	-3.71245
WASF1	0.654491	3.31498	2.19764	0.0361283	-3.77605
LAMP3	0.845631	2.38271	2.19701	0.0361779	-3.68268
CLEC2D	0.394963	4.27229	2.19679	0.0361952	-3.90123
VAX2	1.31568	-0.413641	2.19666	0.0362049	-3.58265
INPP4A	0.441955	4.54196	2.19576	0.0362761	-3.9344
ZFP64	0.376883	4.53558	2.19511	0.0363275	-3.93491
PLCXD3	1.13088	0.0789186	2.19451	0.0363744	-3.59056
CLIC5	0.772128	2.09915	2.19448	0.0363766	-3.66606
C8orf59	0.578553	4.97658	2.19426	0.0363944	-3.97856
ESCO2	1.42056	-0.24847	2.19229	0.03655	-3.59033
SLC37A3	0.543967	5.45465	2.19127	0.0366312	-4.01617
VCPIP1	0.552429	4.84338	2.18936	0.0367834	-3.97615
FNDC1	1.51193	0.0448874	2.18917	0.0367984	-3.59836
SMC6	0.370997	4.18316	2.18868	0.0368378	-3.9049
MSL3	0.370354	4.63681	2.18783	0.0369058	-3.95898
C1orf84	0.702796	-0.529071	2.18775	0.036912	-3.59564
CSTF2	0.355177	4.05477	2.18746	0.0369347	-3.89043
KIAA0907 (KHDC4)	0.579909	5.42639	2.1872	0.0369557	-4.02216
TFE3	0.334537	5.87548	2.18687	0.0369824	-4.04329
C20orf20	0.389209	3.86918	2.18516	0.0371197	-3.86994
TMEM64	0.378417	5.07593	2.18458	0.0371667	-4.00425
C14orf143	0.43944	1.73523	2.18427	0.0371916	-3.66101
AMZ2	0.283636	5.86583	2.18354	0.0372503	-4.04912
NBN	0.575346	6.03015	2.18293	0.0372995	-4.05569
C16orf87	0.487017	2.74015	2.18231	0.0373495	-3.73964
ZBTB11	0.526906	5.06445	2.18147	0.0374174	-4.00911
ISM1	0.86461	-0.194933	2.18129	0.0374324	-3.6076
ABTB2	0.883908	2.9822	2.1812	0.0374396	-3.76657
MAP4K4	0.46454	6.38629	2.17993	0.0375423	-4.0689
TLK2	0.249187	4.88613	2.17722	0.0377634	-4.00232
CXCL13	1.99468	0.585179	2.17597	0.0378657	-3.62993
ZNF624	0.503254	1.62663	2.17526	0.0379234	-3.67035
PRKDC	0.747038	7.52256	2.17511	0.0379359	-4.06225
LIMCH1	0.61219	7.47694	2.17494	0.0379498	-4.06405
TBC1D10B	0.266631	5.8312	2.17446	0.0379887	-4.06463
BHLHE40	0.901854	6.7691	2.17417	0.0380125	-4.08061
ULK2	0.433618	5.24006	2.17415	0.0380145	-4.03505
CDK17	0.579123	5.10875	2.17386	0.0380387	-4.02647
THAP1	0.376991	3.24502	2.17305	0.0381053	-3.81125
SDC3	0.407329	6.60449	2.17203	0.0381892	-4.08514
UPF3B	0.382193	3.81401	2.17133	0.0382467	-3.88752
ZBTB2	0.370798	4.09568	2.1713	0.0382492	-3.92514
HNRNPAB	0.281499	7.1876	2.1709	0.0382826	-4.07963
C9orf45	0.714167	2.04146	2.17036	0.0383273	-3.70298
CUL1	0.213809	6.09328	2.17016	0.0383432	-4.08112
KLHL12	0.265426	5.98022	2.16794	0.0385279	-4.08192
CENPW	0.782717	1.44192	2.16781	0.0385381	-3.67381
ZFP30	0.467205	3.44926	2.16622	0.0386709	-3.84876
NAA15	0.444039	5.47776	2.1649	0.0387812	-4.06616
LGALS9	0.73262	4.00803	2.16456	0.0388094	-3.92568
GCNT4	0.693484	-0.446744	2.16453	0.0388118	-3.63083
KIAA0146	0.38341	5.89042	2.16307	0.0389342	-4.08787
LIMK1	0.38886	5.04407	2.16145	0.0390707	-4.04436
NDC80	0.835534	2.24464	2.16095	0.0391124	-3.7335
CLNS1A	0.285974	6.23753	2.16002	0.0391914	-4.10327
ABCC5	0.626103	5.20883	2.15985	0.0392052	-4.05925
ERH	0.276194	6.45301	2.15873	0.0392999	-4.10885
PCDHB14	0.463131	2.86155	2.15797	0.0393648	-3.79417
RSRC1	0.636354	3.19277	2.15751	0.0394038	-3.83232
WWC2	0.630553	4.43007	2.15732	0.03942	-3.99212
AP3M2	0.436188	4.69894	2.15694	0.0394522	-4.02184
UVRAG	0.283763	4.67733	2.15644	0.0394946	-4.02059
GLS	0.42168	5.5223	2.15608	0.0395254	-4.0847
ZNF664	0.450045	7.86213	2.15601	0.0395314	-4.08517
KDM2B	0.410585	4.40829	2.15596	0.0395352	-3.99206
TYMS	0.685266	2.71123	2.15544	0.0395796	-3.78333
DIDO1	0.337353	6.56363	2.15494	0.0396223	-4.11661
TGFBR1	0.362424	5.67899	2.15475	0.0396386	-4.09466
MORC2	0.254646	5.73265	2.15249	0.0398311	-4.10115
ADAM17	0.569574	3.90626	2.15129	0.0399348	-3.93587
KRR1	0.395561	5.13105	2.15066	0.0399881	-4.07066
KIAA0947	0.433049	5.47959	2.15017	0.0400305	-4.09331
BAG4	0.956656	2.68478	2.1497	0.0400712	-3.79063
HMMR	1.31203	1.44683	2.14885	0.0401439	-3.70508
C1orf216	0.352292	4.40638	2.14869	0.0401577	-4.005
MSC	0.693548	1.39563	2.14834	0.0401882	-3.70354
CRISP3	3.11483	4.44247	2.14824	0.040197	-4.01001
MRPS6	0.440628	4.42356	2.14796	0.0402208	-4.00832
CCDC21	0.553184	3.17446	2.14793	0.0402235	-3.84689
RRP15	0.356524	4.4662	2.1475	0.0402611	-4.01409
TOP1P1	0.416466	2.30164	2.14668	0.0403319	-3.7621
CHAF1B	0.488705	3.06126	2.14622	0.040372	-3.83658
ADCK2	0.275355	5.64062	2.14389	0.0405737	-4.11282
APLF	0.569953	0.708239	2.14385	0.040578	-3.68425
SLC25A32	0.433632	4.52131	2.14296	0.040655	-4.02853
CMTM8	0.630133	3.42551	2.14249	0.0406965	-3.88767
ZNF584	0.314083	3.14412	2.14219	0.0407222	-3.85329
SPIN1	0.386871	6.80334	2.14177	0.0407591	-4.14004
HOXA1	0.697688	-0.247668	2.14129	0.040801	-3.66754
FBXO41	0.813122	3.42823	2.13886	0.0410139	-3.8944
WDR62	0.959834	0.737736	2.13853	0.0410431	-3.69357
MFSD4	0.943909	3.01542	2.13833	0.041061	-3.84503
CILP2	0.706322	1.03568	2.13775	0.0411122	-3.70544
ATP6AP2	0.288818	7.2055	2.13719	0.0411617	-4.1412
USP9X	0.468662	7.11302	2.13692	0.041185	-4.14385
RPRD2	0.446888	6.22745	2.13619	0.0412491	-4.14682
TUBB3	0.749961	4.07506	2.13555	0.041306	-3.98677
PXK	0.818088	2.87664	2.1353	0.0413282	-3.83494
MRPL15	0.421934	5.34776	2.13518	0.041339	-4.11324
RNF2	0.464375	4.50356	2.13473	0.0413788	-4.04141
GPR143	0.654656	2.1606	2.13372	0.041468	-3.77298
ATAD5	0.867023	0.722008	2.13281	0.0415487	-3.70206
SKAP2	0.504577	5.1252	2.13175	0.0416437	-4.10469
KDM5B	0.434557	6.78881	2.13141	0.0416735	-4.15913
ZNF669	0.536139	2.04219	2.12874	0.0419124	-3.77267
ZNF567	0.544423	2.64915	2.12773	0.0420028	-3.82476
DHX40	0.349896	5.95158	2.12715	0.0420553	-4.15584
PLK4	0.740037	1.10794	2.12669	0.0420963	-3.72599
TRAIP	0.591794	1.66349	2.12599	0.0421599	-3.75341
ALG11	0.786765	-0.774505	2.12529	0.0422228	-3.68694
FAM131B	0.830128	-0.232627	2.12483	0.0422641	-3.6924
KIFC1	1.02092	2.27099	2.12459	0.0422861	-3.79683
LACTB2	0.56045	3.754	2.12449	0.0422951	-3.96298
FAM111B	1.03901	2.2232	2.12408	0.0423316	-3.79389
APEX2	0.277108	4.85287	2.12383	0.0423546	-4.09666
EVI2B	0.759846	2.78211	2.12351	0.042384	-3.84524
PFDN4	0.399456	3.8529	2.12288	0.0424407	-3.97924
UBE2A	0.31892	5.76182	2.12151	0.0425647	-4.15898
CTNNAL1	0.519871	5.70308	2.12126	0.0425876	-4.15691
CCT6A	0.271404	7.38867	2.12075	0.0426342	-4.16617
TCHP	0.267526	4.1714	2.12035	0.0426703	-4.02667
ACTR2	0.435599	7.7705	2.12029	0.0426756	-4.15385
SMG7	0.30264	6.67949	2.11994	0.0427075	-4.18073
ZNF217	0.671079	6.95212	2.11982	0.042719	-4.17815
PBK	1.44051	0.612531	2.11968	0.0427313	-3.71913
TPR	0.460019	7.01609	2.11939	0.0427578	-4.17781
ARHGEF3	0.528778	5.29032	2.11898	0.0427952	-4.13912
LGR4	0.614845	5.91031	2.1182	0.0428663	-4.1707
CHD5	0.894824	0.629849	2.11592	0.0430755	-3.72554
LBR	0.555153	5.92672	2.11517	0.0431444	-4.17679
BRCA2	1.1687	0.0202357	2.11513	0.0431486	-3.71118
ISCA1	0.250744	5.28386	2.11464	0.0431935	-4.14656
CKAP5	0.523517	6.76393	2.11459	0.0431977	-4.18998
SASS6	0.507897	2.71768	2.11347	0.0433007	-3.85577
DNAJA3	0.249777	6.00323	2.11246	0.0433941	-4.18418
IDS	0.396361	7.00681	2.10902	0.0437133	-4.19681
VRK1	0.317418	3.1607	2.10854	0.043758	-3.91364
SLC22A15	0.929869	1.67641	2.10805	0.0438033	-3.78337
CENPK	0.878831	-0.473597	2.10805	0.0438037	-3.71433
RBM12B	0.578952	4.46995	2.10751	0.0438546	-4.08645
SIK2	0.486808	5.18728	2.10709	0.0438929	-4.15373
EPB41L4B	0.568794	6.06569	2.10657	0.0439415	-4.19672
C5orf39	0.883864	1.56231	2.1061	0.0439859	-3.78029
KGFLP2	0.615263	2.50664	2.1045	0.0441355	-3.85068
TMEM56	0.585626	4.796	2.10367	0.0442142	-4.12763
C4orf46	0.441911	2.85481	2.10337	0.0442417	-3.88726
C4orf32	0.599486	4.17796	2.10235	0.044338	-4.05956
HSD17B12	0.419871	6.57526	2.10202	0.0443692	-4.21324
AMMECR1	0.602617	4.10261	2.10193	0.0443775	-4.05028
PTGR1	0.978831	6.80932	2.10166	0.0444034	-4.21302
CSNK1G3	0.374931	5.04491	2.10143	0.0444246	-4.15334
LGALS2	1.15384	-0.492554	2.10142	0.044426	-3.72385
PLEKHH2	0.84045	1.76033	2.10076	0.0444877	-3.80015
MGAT3	0.724557	0.673412	2.10056	0.0445072	-3.75086
SFRS15	0.322887	5.33048	2.09927	0.0446288	-4.1772
ZNF134	0.401164	3.80775	2.09926	0.0446297	-4.01472
DCLRE1A	0.484189	4.68676	2.09909	0.0446459	-4.12504
C5orf33	0.3313	5.71245	2.09849	0.0447032	-4.19854
CD276	0.420872	7.28903	2.09844	0.0447076	-4.20943
H2AFY	0.372912	7.47364	2.09797	0.044752	-4.20478
RAPGEF1	0.404674	6.31229	2.09625	0.0449164	-4.22099
MYST2	0.394909	5.71518	2.09621	0.0449196	-4.20276
CETN3	0.728007	3.87165	2.09533	0.0450042	-4.0304
SPOPL	0.780775	5.20129	2.09532	0.0450048	-4.17587
PIP5K1A	0.496477	5.7777	2.09527	0.0450095	-4.20712
SSH1	0.45829	5.33734	2.09353	0.0451758	-4.18794
CST2	2.29103	1.21656	2.09285	0.0452415	-3.7846
UBE2D1	0.445117	4.22237	2.09262	0.0452628	-4.08258
LOC100170939	1.04858	1.02021	2.09163	0.0453578	-3.77793
ZBTB33	0.374266	5.23724	2.09098	0.0454209	-4.1861
FAM123B	0.471652	3.29797	2.09084	0.045434	-3.96128
RNF146	0.333672	5.04083	2.09049	0.0454681	-4.17264
EXPH5	0.673971	3.50553	2.09024	0.0454921	-3.98945
DPP9	0.274808	5.68734	2.08946	0.0455677	-4.21367
TNFSF13B	0.967011	-0.176531	2.08941	0.045572	-3.74603
ZNF280C	0.693034	2.03323	2.0894	0.0455731	-3.83698
PLCH1	1.0346	0.886096	2.08933	0.0455802	-3.77612
CEP170	0.582353	4.58527	2.08838	0.0456716	-4.13343
AKAP6	0.630855	1.60029	2.08772	0.0457359	-3.81201
ACTL6A	0.408885	5.39922	2.08658	0.0458459	-4.20408
PTGER3	0.737726	1.52828	2.08626	0.0458769	-3.81044
SRFBP1	0.525391	3.59531	2.08591	0.0459109	-4.00905
TSN	0.252435	6.16577	2.08357	0.0461392	-4.24082
CA13	0.945439	1.55145	2.0833	0.0461653	-3.81644
TAF2	0.802852	5.00886	2.0822	0.046273	-4.18489
GAL3ST4	0.641191	2.37915	2.08101	0.0463896	-3.87852
OXCT1	0.527847	6.04626	2.08096	0.0463944	-4.24232
FOXP3	0.832224	0.419263	2.08083	0.0464072	-3.77309
DPY19L4	0.446841	5.51297	2.08016	0.0464731	-4.22185
PKD2	0.579757	4.91688	2.0799	0.0464986	-4.18117
RRAGC	0.963028	3.44299	2.07984	0.0465044	-3.99912
SLC10A3	0.298654	5.10043	2.0795	0.0465375	-4.19688
PIGA	0.558675	3.52655	2.07943	0.0465448	-4.01099
CSDE1	0.308815	9.4714	2.07589	0.0468937	-4.17001
SRP9	0.385835	7.55845	2.07579	0.0469036	-4.24177
TNPO3	0.507314	5.32373	2.07579	0.0469036	-4.21885
ADIPOR1	0.336896	7.38226	2.07513	0.0469692	-4.24864
FDPS	0.450527	6.61481	2.07399	0.0470824	-4.26376
CAND1	0.429485	6.9311	2.07388	0.0470937	-4.26141
SRPK2	0.466857	5.59594	2.0712	0.047361	-4.24209
STRN3	0.467842	5.05735	2.07055	0.0474258	-4.2095
NUPL2	0.2684	4.61962	2.06982	0.047499	-4.17004
EIF2C2	0.818199	3.03113	2.06961	0.0475194	-3.9646
IL32	0.704466	4.72966	2.06948	0.0475327	-4.18203
ADAMTS6	0.678153	-0.777791	2.06889	0.047592	-3.76808
FGD1	0.640305	3.88974	2.06844	0.0476367	-4.07989
IFI27	0.810506	4.0266	2.06776	0.0477053	-4.10002
GCET2	0.930593	-0.377813	2.0662	0.0478628	-3.77679
AURKB	1.30898	0.612603	2.06483	0.0480003	-3.80383
EPB41L1	0.307047	5.67717	2.06429	0.0480558	-4.25824
SPTLC1	0.284135	6.13525	2.06403	0.0480818	-4.27504
ADORA1	1.09263	-1.19605	2.06396	0.0480887	-3.77275
ZNF385B	1.26042	4.0403	2.06253	0.0482332	-4.11103
PDCL	0.3684	4.78056	2.06209	0.0482779	-4.20012
PCDHB6	0.873741	0.260033	2.06167	0.048321	-3.79744
GRIN3A	1.66864	2.53835	2.06166	0.0483225	-3.92517
LOC387646	0.727169	-0.675851	2.06165	0.0483229	-3.7794
SFRS1	0.257095	7.7073	2.06161	0.0483267	-4.26169
CCNI	0.545569	8.15672	2.05988	0.0485032	-4.24737
TMEM168	0.389155	5.873	2.05972	0.0485201	-4.27451
RNF8	0.277355	4.1798	2.05936	0.0485562	-4.13546
RHOA	0.205318	8.74922	2.05847	0.0486471	-4.22756
ZNF420	0.577403	3.11266	2.05784	0.0487118	-3.99439
SLC29A1	0.491763	4.72632	2.05666	0.0488331	-4.20434
POLA1	0.433069	4.17451	2.0564	0.0488597	-4.13993
TMEM19	0.317248	4.27354	2.05579	0.0489222	-4.15393
PLAA	0.294644	5.3445	2.05555	0.0489465	-4.25612
HNRPLL	0.306043	4.97411	2.05531	0.0489717	-4.22973
INHBA	1.49975	0.812159	2.05489	0.049015	-3.8266
CCDC50	0.485978	6.45883	2.05466	0.0490384	-4.29744
ASAP1	0.574509	4.55328	2.05337	0.0491712	-4.19178
GAS2	1.30168	0.291788	2.05266	0.0492445	-3.81188
CA5BP	0.415238	3.40275	2.05218	0.049295	-4.04122
NMD3	0.390191	5.7528	2.05062	0.0494559	-4.28587
ASS1	0.850969	6.15392	2.05003	0.0495177	-4.30042
SELL	1.16574	2.11054	2.04861	0.0496652	-3.90938
ZYG11B	0.358877	5.56827	2.04802	0.0497272	-4.2819
IKBIP	0.362882	3.14792	2.04798	0.0497305	-4.01542
MSH6	0.394398	5.833	2.0471	0.0498231	-4.29538
SDCBP	0.414888	7.19581	2.04677	0.0498569	-4.30428
POC1B	0.295458	3.7135	2.04495	0.0500478	-4.09604
PHF14	0.286553	5.55894	2.04493	0.05005	-4.28689
GPN1	0.243246	5.18072	2.04262	0.050293	-4.26816
PTPRO	1.01859	-0.511945	2.04202	0.0503555	-3.80964
ZNF79	0.304526	2.55265	2.04118	0.0504441	-3.96038
MAFG	0.400618	4.74066	2.04097	0.0504667	-4.23333
DDHD2	0.430404	5.59284	2.03982	0.0505888	-4.29763
C3orf67	0.689449	-0.698091	2.03976	0.0505951	-3.81032
TBC1D23	0.379911	5.02952	2.03674	0.0509158	-4.26702
ONECUT2	1.30111	2.71714	2.03506	0.0510947	-3.9872
SPRED2	0.603099	4.93511	2.0345	0.051155	-4.26298
WDR3	0.542382	5.41547	2.03438	0.0511672	-4.29772
FKBP15	0.308255	5.57619	2.03406	0.0512012	-4.30694
GNAI2	0.267757	7.71455	2.03399	0.0512096	-4.31033
LMBR1	0.371575	5.74604	2.03373	0.0512373	-4.31544
KLB	1.61066	0.467858	2.0333	0.0512835	-3.84661
MMGT1	0.268583	5.11035	2.033	0.0513151	-4.27991
ZNF322A	0.441149	5.81831	2.0327	0.0513472	-4.32024
KCNQ2	1.77629	0.0133847	2.03244	0.0513752	-3.83423
PSMD10	0.32998	5.47414	2.03196	0.0514269	-4.30529
EPR1	1.24633	1.59293	2.03032	0.0516032	-3.90308
ATP6V1C1	0.37351	6.07197	2.02975	0.0516646	-4.33411
ACSL4	0.531267	4.34451	2.02951	0.0516901	-4.20869
FBXO11	0.31955	5.90671	2.0295	0.051692	-4.32925
MYBL1	0.571706	1.05166	2.02847	0.0518032	-3.8777
MAPK7	0.316306	4.03383	2.02762	0.0518951	-4.17062
MNX1	1.46302	0.393626	2.0272	0.0519401	-3.85322
AKR1C1	1.15629	2.07997	2.02691	0.0519717	-3.94202
BUB3	0.249219	6.31228	2.02633	0.0520343	-4.34563
FN1	0.800166	8.39451	2.02596	0.0520748	-4.29805
CAPZA1	0.333928	6.93998	2.02386	0.0523035	-4.35005
TMEM108	1.05238	-0.892584	2.02261	0.0524401	-3.83225
OLFML2B	0.73148	3.05216	2.02215	0.0524898	-4.0469
ADNP	0.566887	6.94697	2.02164	0.0525457	-4.35384
NDUFB4	0.364583	6.74787	2.02163	0.0525471	-4.35628
ZBTB6	0.457321	3.77973	2.02124	0.0525893	-4.14588
OPRK1	1.49292	3.03343	2.02008	0.0527174	-4.04807
EPB41L5	0.512393	4.78049	2.01998	0.0527282	-4.27396
S100A10	1.0132	6.72305	2.01908	0.052827	-4.36093
USP22	0.394446	8.3457	2.01777	0.0529716	-4.31424
SH3GL1	0.248992	6.69406	2.01714	0.0530407	-4.36448
HTATSF1	0.219341	6.31476	2.01678	0.0530809	-4.36247
CGGBP1	0.311506	6.71212	2.01578	0.0531907	-4.36678
C2orf89	0.923355	-0.944872	2.01572	0.0531978	-3.8413
SF3B4	0.301217	6.35551	2.01483	0.0532967	-4.36655
NUP155	0.598005	4.33912	2.01474	0.0533058	-4.23356
UTP18	0.254743	5.10824	2.0143	0.0533548	-4.31244
YTHDF3	0.386724	6.64855	2.01339	0.0534563	-4.37116
FBXL7	0.476306	4.23692	2.01242	0.0535638	-4.22439
ITGA4	1.02669	2.54189	2.01152	0.0536639	-4.00791
SNRPE	0.401915	5.33321	2.00981	0.0538558	-4.33582
PPIL5	0.305849	2.61698	2.00935	0.0539072	-4.01902
FOXRED2	0.458882	5.87822	2.00863	0.0539871	-4.36478
MCART1	0.32618	2.99284	2.00693	0.0541787	-4.06497
UPRT	0.355458	4.20383	2.00651	0.0542253	-4.23016
TGS1	0.45494	4.55961	2.00595	0.054289	-4.27504
TOPBP1	0.423022	4.86702	2.00568	0.054319	-4.30706
CSGALNACT2	0.400824	4.43745	2.00501	0.0543945	-4.26242
NVL	0.603066	5.00988	2.0043	0.0544746	-4.32201
KPNB1	0.377003	7.99815	2.00371	0.054541	-4.35227
KIF24	0.563697	1.28547	2.00364	0.0545495	-3.92766
HNRNPA2B1	0.281493	9.357	2.00292	0.0546309	-4.30212
ABCB7	0.293716	4.35367	2.00256	0.0546714	-4.25636
CCBP2	0.482271	0.339919	2.00198	0.0547371	-3.88888
SUB1	0.348865	7.17251	2.0012	0.0548259	-4.38498
CD48	0.811627	2.79361	2.00018	0.0549424	-4.05292
BACE1	0.327332	5.48186	1.99863	0.0551193	-4.36397
C5orf36	0.646982	1.0731	1.99749	0.0552487	-3.92624
VCAM1	0.789368	3.50473	1.99746	0.0552521	-4.14763
POLR3C	0.290058	4.16647	1.99656	0.0553555	-4.24213
RRAS2	0.248258	4.52421	1.99629	0.0553863	-4.28765
RUVBL1	0.365937	5.80726	1.99606	0.0554128	-4.38392
TOR1A	0.332784	5.80287	1.99527	0.0555035	-4.38512
C9orf172	0.832253	0.211576	1.9952	0.0555122	-3.8946
RTN4R	0.646247	1.99168	1.99375	0.055679	-3.98801
PWP1	0.204195	5.29708	1.98953	0.056167	-4.36874
ZNF28	0.551968	4.33464	1.98899	0.0562293	-4.2772
IL17RD	0.574073	4.19628	1.9887	0.0562624	-4.25958
TOMM70A	0.303783	6.80361	1.98856	0.0562792	-4.41357
RASSF8	0.638721	4.97767	1.98823	0.0563173	-4.34709
SAMHD1	0.758016	4.28648	1.98821	0.05632	-4.27233
PEG10	1.48616	2.46524	1.98785	0.056362	-4.03874
MTMR1	0.429428	5.15162	1.98738	0.056416	-4.36238
AGTPBP1	0.500392	4.06455	1.98626	0.0565478	-4.24561
ZBTB44	0.381869	6.25069	1.98559	0.0566256	-4.41569
COL10A1	1.70611	1.84507	1.98546	0.0566405	-3.99009
TRPC1	0.625443	2.31715	1.98469	0.0567303	-4.02988
HMOX1	0.807488	3.11814	1.98458	0.056744	-4.11745
CSRNP2	0.356486	5.00596	1.98392	0.0568209	-4.3569
CALHM2	0.46321	3.58993	1.98384	0.0568307	-4.18238
LHFP	0.501859	4.41327	1.98258	0.0569788	-4.29795
DSCC1	0.641877	1.94898	1.98235	0.0570054	-4.00271
PRPF40A	0.396765	6.38228	1.98215	0.0570291	-4.42388
NUP133	0.315078	5.66493	1.98213	0.0570316	-4.40184
HDGFRP3	0.383329	4.94797	1.98197	0.0570504	-4.35528
SFRS13A	0.255885	6.13804	1.98135	0.0571235	-4.42041
SNRPF	0.404425	5.08435	1.98102	0.0571621	-4.36822
KIAA1267	0.401576	5.71575	1.98098	0.057167	-4.40616
CDC73	0.385625	6.05874	1.97996	0.0572874	-4.42065
SUN1	0.314516	6.75986	1.97908	0.0573911	-4.43039
PPP2R3A	0.421967	4.08886	1.97903	0.0573971	-4.26125
LARP1	0.396807	7.82177	1.9787	0.0574358	-4.40256
U2AF2	0.256885	7.43	1.97848	0.0574624	-4.41716
C9orf64	0.426069	4.3719	1.97847	0.0574632	-4.29985
ZNF434	0.29988	4.06209	1.97841	0.0574705	-4.25856
CTSS	0.678964	5.0277	1.97833	0.0574798	-4.36831
C9orf167	0.59396	1.64268	1.97811	0.0575055	-3.98783
RABGAP1L	0.456238	2.8383	1.97791	0.0575299	-4.09435
TAB2	0.324157	6.83361	1.97781	0.0575417	-4.43188
PNMA3	0.841588	-0.60875	1.97727	0.0576056	-3.89958
TNPO2	0.270179	6.61452	1.97673	0.0576698	-4.43497
CDR2	0.355447	4.8555	1.97598	0.0577593	-4.35717
UBE2I	0.255798	6.48032	1.97544	0.0578235	-4.43656
RHOH	0.631656	2.34779	1.97463	0.057919	-4.04876
NCOR1	0.560728	6.72752	1.97422	0.0579689	-4.43904
GTF2IRD1	0.223409	4.74163	1.973	0.0581138	-4.35106
P2RY10	1.1318	-0.927845	1.97299	0.0581152	-3.90037
C14orf147	0.261492	5.79212	1.9728	0.0581387	-4.42357
ANTXR1	0.650153	6.46459	1.97193	0.0582423	-4.44247
DKK2	1.0813	0.630789	1.97087	0.0583696	-3.94605
E2F5	0.798561	3.35259	1.9696	0.0585217	-4.17312
GSTCD	0.601528	3.4362	1.96955	0.0585285	-4.18469
ANAPC10	0.310953	2.28855	1.96936	0.058551	-4.05171
SFMBT1	0.439356	3.53702	1.96927	0.0585613	-4.19921
FAM157A	1.17116	-0.708736	1.96884	0.0586135	-3.90948
HCCS	0.297173	4.23114	1.96876	0.0586228	-4.2981
MKI67	1.03904	4.02631	1.96876	0.0586233	-4.26979
C5orf28	0.350409	3.70214	1.96868	0.0586329	-4.22362
RIC8A	0.19942	6.60938	1.96823	0.0586868	-4.44962
AKAP2	1.4172	4.19666	1.96817	0.0586945	-4.29447
KIAA1804	0.638649	3.02022	1.96773	0.0587476	-4.13274
TCF3	0.288117	6.0035	1.96697	0.0588389	-4.44134
NCKAP1	0.424886	7.334	1.96633	0.058917	-4.44104
PSMD14	0.309682	5.68843	1.96601	0.0589551	-4.43069
MAP1B	0.667487	6.3549	1.96596	0.0589617	-4.45143
ANKRD13B	0.568377	3.12801	1.96346	0.0592654	-4.15339
CEP70	0.316476	4.7479	1.96345	0.059266	-4.36799
ZNF230	0.363431	2.26209	1.96319	0.0592978	-4.0591
MTFR1	0.426652	4.56355	1.96255	0.0593754	-4.34976
C12orf76	0.37487	3.04631	1.9625	0.0593816	-4.14453
C16orf88	0.316095	4.10595	1.9621	0.0594302	-4.2922
ENY2	0.417806	4.83082	1.96118	0.0595426	-4.38009
MRPL13	0.426863	4.9563	1.96036	0.059643	-4.39301
POU2AF1	1.13146	0.739023	1.96008	0.0596773	-3.96677
RINL	0.463268	2.15586	1.95977	0.0597153	-4.05511
ZDHHC3	0.27143	6.204	1.95937	0.0597647	-4.45991
EVI2A	0.736608	1.97763	1.95865	0.0598531	-4.0421
VBP1	0.28537	5.66549	1.95757	0.0599855	-4.44411
DARS2	0.425451	4.64573	1.95725	0.0600243	-4.36784
E2F3	0.633679	3.79184	1.95715	0.0600368	-4.25568
NUAK1	0.597922	3.85879	1.95544	0.0602471	-4.26814
IL13RA1	0.317245	6.43939	1.95483	0.0603236	-4.47164
FAM82B	0.30135	5.09409	1.95415	0.0604076	-4.41498
STIP1	0.291708	7.46214	1.95404	0.0604207	-4.45814
ZC3H3	0.390822	4.90438	1.9533	0.0605128	-4.40037
NUDT11	0.873398	4.62135	1.95244	0.0606189	-4.37333
ADH1B	1.23875	1.87475	1.95176	0.0607033	-4.04485
PPAT	0.535342	4.15656	1.95136	0.060753	-4.31728
NEDD1	0.388015	4.3741	1.95091	0.0608092	-4.34681
LOC728554	0.570676	3.02204	1.95055	0.0608536	-4.16091
PTPLB	1.17673	3.7206	1.94917	0.0610259	-4.25872
CTSZ	0.341524	7.25298	1.94871	0.0610832	-4.4735
ZNF627	0.412091	4.55642	1.94861	0.0610964	-4.37257
SCYL2	0.507044	5.60762	1.94848	0.0611116	-4.45685
TFG	0.313562	6.82181	1.94798	0.061174	-4.48329
TUB	0.566483	4.44105	1.94579	0.0614496	-4.36369
GPR160	0.54057	6.63487	1.94547	0.0614887	-4.48868
CASC5	1.40504	-0.270142	1.94533	0.0615064	-3.95192
CD180	0.789006	0.749607	1.9451	0.0615353	-3.98941
ESF1	0.383422	4.21664	1.94441	0.0616224	-4.33716
BMP2	0.954898	1.72907	1.94427	0.0616404	-4.04586
C5orf15	0.274887	6.40591	1.94418	0.0616517	-4.48947
ANKRD40	0.248354	5.82851	1.94384	0.0616949	-4.47466
PPP2R5E	0.456927	4.6804	1.94377	0.0617031	-4.39438
WIPF1	0.498183	4.77518	1.94361	0.061723	-4.40442
NOTCH3	0.602201	6.18748	1.94356	0.0617297	-4.48657
ELAVL1	0.204802	6.69023	1.94219	0.0619025	-4.49419
PDK1	0.4449	4.01064	1.94093	0.0620625	-4.31416
MAML1	0.397805	6.02199	1.94011	0.0621657	-4.48791
TMEM20	0.606131	1.2763	1.93967	0.062222	-4.02474
RALGPS2	0.609801	4.58684	1.93859	0.0623594	-4.39288
ACBD3	0.424616	6.37038	1.93852	0.0623679	-4.49864
EEA1	0.49203	5.25579	1.93771	0.0624713	-4.45469
INSIG2	0.337007	4.63079	1.93741	0.0625097	-4.39974
FYTTD1	0.319338	6.22591	1.93695	0.0625683	-4.49872
EPHA2	0.767698	3.54286	1.93677	0.0625901	-4.25372
RGPD1	0.689742	3.67367	1.93657	0.0626157	-4.27279
LASS2	0.313999	7.89612	1.93565	0.062734	-4.47326
SLC7A7	0.705254	2.13124	1.93543	0.0627619	-4.09109
ZNF569	0.390116	2.67709	1.93486	0.0628354	-4.14549
USP37	0.410461	4.41197	1.93472	0.0628529	-4.37872
BBS10	0.501842	4.26987	1.93446	0.0628864	-4.36091
ATXN7L3	0.329035	5.9365	1.93337	0.0630256	-4.49655
RNF169	0.603285	4.47378	1.93324	0.0630421	-4.38873
EIF5A2	0.585033	2.16061	1.933	0.0630734	-4.09745
GALNT3	0.636859	6.65445	1.9327	0.0631116	-4.51043
CASP3	0.320089	4.57745	1.93232	0.0631609	-4.40236
RNPC3	0.470212	2.65027	1.9319	0.0632152	-4.14725
COL5A2	0.696239	4.71422	1.93189	0.0632159	-4.41794
EEF1A2	1.20285	5.67212	1.93187	0.0632181	-4.48818
BATF	0.891459	1.09915	1.93187	0.0632186	-4.02661
NUP54	0.360743	5.01881	1.93119	0.063306	-4.44782
PCDHGA6	0.962744	1.19648	1.9309	0.0633431	-4.0334
ZCCHC8	0.320097	4.48649	1.93019	0.063435	-4.39537
ARPM1	0.534504	0.355472	1.92961	0.0635101	-3.99504
RCL1	0.303395	3.87879	1.92956	0.0635165	-4.31401
PIM2	0.585455	3.58044	1.92941	0.063536	-4.27117
SRGAP2	0.529421	4.53983	1.92912	0.063574	-4.40344
MCTP1	0.928492	0.964187	1.92856	0.0636457	-4.02439
FZD6	0.449745	5.2958	1.92848	0.0636567	-4.47299
CLK2	0.360299	5.14207	1.92753	0.0637789	-4.46377
FBXO5	0.513553	2.56066	1.92708	0.063838	-4.1453
CDC45	1.07297	0.428436	1.92668	0.06389	-4.00222
KHDRBS3	1.06273	3.53679	1.92663	0.0638966	-4.26947
CAPZA2	0.291437	6.64081	1.92637	0.0639304	-4.5212
SNORD1C	0.86829	-0.450574	1.92609	0.0639667	-3.97403
GABPA	0.34178	5.10732	1.92535	0.0640632	-4.46479
C1orf9	0.4174	6.20605	1.9246	0.0641606	-4.51923
ZNF207	0.232061	7.05849	1.92298	0.0643723	-4.52195
UBR5	0.576636	6.83514	1.92275	0.0644017	-4.52606
ITCH	0.355391	6.03919	1.92241	0.0644469	-4.51848
TMEM135	0.355594	5.46527	1.92159	0.064554	-4.49492
NCOA3	0.464003	5.7759	1.9215	0.0645662	-4.5104
KPNA3	0.361976	4.81036	1.92123	0.0646016	-4.4456
ZBTB10	0.855662	6.33883	1.92071	0.0646688	-4.52838
CCDC74A	0.825867	3.11903	1.92059	0.0646846	-4.22175
SNURF	1.02554	2.58289	1.91949	0.0648296	-4.15963
CYFIP2	0.463482	5.85244	1.91924	0.0648621	-4.51732
HNF1A	1.20377	0.942743	1.91907	0.0648843	-4.03729
TDG	0.341507	4.26991	1.91809	0.0650144	-4.38818
CTPS	0.285003	4.92121	1.91768	0.0650682	-4.46202
PEX19	0.264281	6.75223	1.91603	0.0652859	-4.53822
RAB2A	0.412896	5.9722	1.91585	0.0653094	-4.52741
GIT1	0.268909	6.17526	1.91539	0.0653706	-4.53406
SENP1	0.384815	3.96295	1.91497	0.0654261	-4.35025
PIGC	0.313275	4.87115	1.91301	0.0656862	-4.46521
FAR1	0.254423	5.98661	1.91231	0.0657803	-4.53385
ZNF704	0.815792	4.55086	1.91142	0.0658982	-4.43425
FAM20B	0.271768	6.24833	1.90967	0.0661327	-4.54536
STYX	0.277383	4.47133	1.90955	0.0661485	-4.42796
ZNF182	0.402377	2.98163	1.90946	0.0661608	-4.22189
ARMC8	0.306036	4.95811	1.90841	0.0663011	-4.48084
IFI30	0.64953	5.6758	1.90688	0.0665072	-4.53051
KDELC1	0.542556	1.74287	1.906	0.0666252	-4.10527
ZMYND8	0.450677	5.50355	1.90524	0.066728	-4.52451
RECQL	0.455156	4.27598	1.90491	0.0667727	-4.4108
TBCCD1	0.333735	3.43254	1.90484	0.0667817	-4.29005
BICD2	0.346202	5.04574	1.90461	0.0668125	-4.49463
CCNF	0.640258	3.10246	1.9044	0.0668413	-4.24553
ZCCHC10	0.295985	3.53073	1.9044	0.0668415	-4.30478
MARK1	0.476711	3.62373	1.90436	0.0668466	-4.31828
ZNF782	0.575693	2.29746	1.90406	0.0668873	-4.15498
RPP14	0.209013	4.5307	1.90403	0.0668907	-4.4442
RASSF10	1.29966	-0.549789	1.90317	0.0670076	-4.00296
FBLN5	0.649429	5.32746	1.90297	0.0670342	-4.51789
PALB2	0.333246	3.25225	1.90234	0.0671203	-4.26895
IFI16	0.505212	4.84787	1.90166	0.0672119	-4.48193
RFTN1	0.49835	4.046	1.90117	0.0672791	-4.38498
UBA2	0.295684	6.49603	1.90004	0.0674327	-4.56507
ANKRD32	0.570469	2.56989	1.89785	0.0677311	-4.19219
ACVR1C	0.531278	-0.65933	1.89748	0.067782	-4.00801
SFRS9	0.252686	7.22631	1.89638	0.0679323	-4.56271
CYC1	0.296944	7.03953	1.89602	0.0679808	-4.56771
TARS2	0.338636	4.92263	1.896	0.0679845	-4.49833
PTGES3	0.266429	8.26321	1.89586	0.068003	-4.5255
PRPSAP2	0.239253	4.82925	1.89564	0.0680331	-4.49013
PLIN1	0.933608	0.212443	1.89551	0.0680507	-4.03799
ATL2	0.292789	5.62062	1.89434	0.0682125	-4.54886
THOC3	0.327552	4.91054	1.89402	0.0682563	-4.5005
AP1AR	0.447855	4.5683	1.89353	0.0683229	-4.46591
PRIM1	0.419191	2.01042	1.89305	0.0683898	-4.14603
BRIX1	0.273929	4.90917	1.89117	0.068649	-4.5051
DHX9	0.324614	7.57106	1.89037	0.0687603	-4.56195
FANCF	0.374442	4.78212	1.88995	0.0688176	-4.49487
DERL1	0.346751	6.54525	1.88982	0.0688356	-4.5825
RWDD3	0.352243	3.93008	1.8896	0.0688669	-4.38703
HOOK3	0.486491	5.67192	1.88958	0.0688697	-4.55926
PYHIN1	1.00665	-0.805426	1.88894	0.068958	-4.01615
ZNF498	0.340063	4.23025	1.88877	0.0689816	-4.43122
FUBP3	0.39567	6.01993	1.88872	0.0689889	-4.57447
SNW1	0.159849	6.01075	1.88869	0.0689922	-4.57422
NKRF	0.280404	4.13417	1.88845	0.0690258	-4.41837
LOC151534	0.80467	0.0659119	1.88749	0.0691594	-4.04366
TMEM164	0.332554	5.28876	1.88748	0.0691614	-4.54119
TAF12	0.278379	4.0576	1.88657	0.0692873	-4.41053
EMD	0.273796	6.18575	1.88643	0.0693067	-4.58288
ZFAT	0.397855	3.79032	1.88613	0.0693488	-4.37218
BRCA1	0.613472	2.67391	1.88606	0.0693582	-4.22203
RRN3	0.306009	6.10307	1.8859	0.0693806	-4.58163
ADAMTS12	0.951183	-0.696571	1.88527	0.0694682	-4.02354
PIK3R2	0.290038	6.51982	1.8838	0.0696749	-4.5924
SKA1	0.933447	0.266884	1.8827	0.0698281	-4.05825
G2E3	0.42298	4.18599	1.88233	0.0698806	-4.43566
EPS15L1	0.210798	5.25305	1.88227	0.0698887	-4.5474
ZNF254	0.416261	4.36022	1.88159	0.0699848	-4.46024
TMEM81	0.502895	1.00798	1.88102	0.0700647	-4.09655
TMEFF1	0.575117	0.949951	1.88091	0.0700804	-4.09352
IGSF6	0.791627	1.18482	1.88082	0.0700926	-4.10696
NIPA1	0.487042	5.24911	1.87993	0.0702179	-4.55101
FBXL16	1.27603	2.16861	1.87956	0.0702707	-4.1806
HNF4G	1.0842	1.58886	1.87837	0.0704386	-4.13601
JRK	0.461126	4.34162	1.87675	0.0706677	-4.46574
FAM171A2	0.678221	1.06729	1.87656	0.0706943	-4.10639
TMEM62	0.473474	4.37439	1.87624	0.0707401	-4.47081
CHRNA3	1.11046	-1.06034	1.8746	0.0709734	-4.0299
MED17	0.309884	4.93541	1.87421	0.071029	-4.53555
QTRTD1	0.361963	4.62536	1.87281	0.0712284	-4.50647
OXSR1	0.296807	5.92866	1.8727	0.0712432	-4.59803
DGCR5	1.25861	0.593943	1.87246	0.071278	-4.08739
INPP5D	0.634377	3.81312	1.87246	0.0712781	-4.39762
UBE2E1	0.312198	6.3096	1.87137	0.0714337	-4.61049
SPAST	0.325128	4.76753	1.87112	0.0714695	-4.52442
PTPRZ1	1.63349	0.368467	1.87039	0.0715738	-4.07992
PREX1	0.530401	5.05581	1.86949	0.0717033	-4.55367
CLDND1	0.298348	5.87519	1.86756	0.0719807	-4.60454
CPNE5	0.783976	0.722053	1.86753	0.0719845	-4.10078
ZNF160	0.281807	4.78692	1.86741	0.0720024	-4.53248
CEP350	0.461522	5.54704	1.86711	0.0720448	-4.59025
TOP1	0.519587	6.96298	1.86655	0.072126	-4.6182
PPP2R5C	0.208173	6.44653	1.86508	0.0723379	-4.62283
FAM175B	0.272308	4.40816	1.86347	0.0725724	-4.49593
ZFP62	0.277047	5.11789	1.86226	0.0727467	-4.57052
SNAPC3	0.407879	4.76077	1.8622	0.0727559	-4.53833
TAF5L	0.334523	4.69128	1.86125	0.0728941	-4.5326
CXorf38	0.432821	2.70025	1.8604	0.0730185	-4.26491
C11orf92	0.885269	6.6859	1.86037	0.0730219	-4.63151
ADAMTSL4	0.545485	2.33333	1.86033	0.0730279	-4.22566
LRBA	0.621443	7.45103	1.85963	0.0731299	-4.61704
DYRK1A	0.271153	6.22629	1.85801	0.0733667	-4.63093
CASP10	0.678143	2.76621	1.85726	0.0734769	-4.27749
LOC202181	0.492455	1.18724	1.85709	0.0735022	-4.14176
DKFZP586I1420	0.400684	3.10334	1.85695	0.0735222	-4.32071
ZNF829	0.985745	-0.287285	1.85672	0.073557	-4.07365
FAM161A	0.445228	1.79759	1.85667	0.0735641	-4.18353
NONO	0.262694	8.75108	1.85624	0.0736268	-4.57198
RNF115	0.338141	4.36061	1.85542	0.073748	-4.50294
PSIP1	0.329902	5.64661	1.85523	0.0737758	-4.61489
LY6E	0.676166	6.74598	1.85491	0.073823	-4.64019
SLC16A14	0.466852	3.29733	1.85427	0.0739167	-4.35163
MEX3C	0.41935	5.07185	1.85422	0.0739238	-4.58003
DAP3	0.256004	6.7391	1.85392	0.0739679	-4.64186
HSF2	0.290686	3.91771	1.8539	0.0739711	-4.44291
JUB	0.632854	3.53331	1.85363	0.0740105	-4.38656
ZNF41	0.612595	3.54174	1.85351	0.0740288	-4.38799
DHX36	0.406797	5.43093	1.85211	0.0742354	-4.60843
PSIMCT-1	0.83292	-0.897398	1.85136	0.0743464	-4.06375
PHF15	0.349907	5.39303	1.85136	0.0743467	-4.60739
POC1A	0.57565	2.01544	1.85105	0.0743929	-4.20997
CD40LG	0.845831	-0.573879	1.85077	0.0744334	-4.07286
SHC1	0.214378	6.935	1.85064	0.0744531	-4.6449
ZNF718	0.53528	2.19093	1.84927	0.0746569	-4.22864
RNF139	0.337545	5.44342	1.84753	0.074916	-4.61667
SNX6	0.276173	5.62886	1.84624	0.0751081	-4.62876
PSMA1	0.196253	6.78116	1.84548	0.0752217	-4.65538
PCDHGA5	1.63273	2.17411	1.84536	0.0752399	-4.23295
CABLES1	0.636271	3.03091	1.84525	0.0752558	-4.32934
SPC25	1.10145	-0.23024	1.84371	0.075487	-4.09319
NOL11	0.213207	5.43992	1.8437	0.0754885	-4.62272
ELOVL1	0.30225	6.6565	1.84303	0.075589	-4.6601
GPNMB	0.702531	5.97054	1.84235	0.0756916	-4.64946
RNF38	0.337066	5.62176	1.84168	0.0757921	-4.63586
EZH2	0.620002	2.56967	1.8407	0.0759394	-4.2804
ANXA9	0.707663	0.794404	1.84045	0.0759774	-4.14317
PSRC1	0.568295	2.07572	1.84018	0.0760181	-4.23163
DDX59	0.323102	4.3178	1.83975	0.0760831	-4.52261
TBCE	0.39043	4.12392	1.83912	0.0761781	-4.49678
BZW2	0.369292	5.73681	1.83906	0.0761862	-4.64557
HPRT1	0.307268	4.76188	1.839	0.0761965	-4.57622
FXR1	0.186152	6.70766	1.83853	0.0762669	-4.6673
C1GALT1	0.407825	2.45749	1.83818	0.0763208	-4.2721
ROD1	0.323697	6.29338	1.83778	0.0763803	-4.66548
USP15	0.26531	4.99032	1.83771	0.0763907	-4.6001
UMPS	0.253611	5.00874	1.8377	0.0763927	-4.60171
CD37	0.73797	3.14441	1.83743	0.0764343	-4.35677
TIGD5	0.498704	3.47553	1.83708	0.0764868	-4.40427
SCML1	0.578384	3.29692	1.83668	0.0765469	-4.37918
SMEK1	0.257817	6.14813	1.8359	0.0766662	-4.6653
UGDH	0.569174	7.05475	1.83421	0.0769229	-4.66955
ATL3	0.644367	4.35385	1.83396	0.0769622	-4.53668
2024-09-02	0.264102	8.62591	1.83395	0.0769637	-4.61313
PCDHGB2	1.3862	2.42918	1.83394	0.0769645	-4.27554
NAT8L	0.637829	1.14396	1.83337	0.0770514	-4.17341
LYN	0.519688	4.80543	1.83334	0.0770555	-4.58982
UQCC	0.252741	5.04	1.83277	0.0771429	-4.61234
HNRNPUL1	0.329274	8.05983	1.83197	0.0772659	-4.63879
OSBPL8	0.576337	5.71001	1.83074	0.0774543	-4.65791
RQCD1	0.488744	3.08659	1.83044	0.0775002	-4.35976
RALGPS1	0.429335	4.07361	1.83018	0.0775406	-4.50381
GIMAP7	0.603822	2.69731	1.82984	0.077592	-4.31151
STK38L	0.380637	5.24714	1.82975	0.0776059	-4.63308
ZFR	0.367372	6.67282	1.8295	0.0776447	-4.68217
FKTN	0.376952	4.78118	1.82852	0.0777953	-4.59514
ZNF16	0.276862	3.90874	1.82834	0.0778236	-4.48237
DUS4L	0.275059	3.02431	1.82831	0.0778275	-4.35472
NT5C3	0.331666	4.16498	1.82824	0.0778386	-4.52005
PPP4R2	0.724519	3.92656	1.82783	0.077902	-4.48583
CD79A	1.28081	0.742685	1.82667	0.0780797	-4.15984
KHSRP	0.2815	6.77596	1.82665	0.0780841	-4.68619
STX3	0.326683	5.34123	1.82634	0.0781314	-4.64491
ZNF398	0.214704	4.73836	1.82596	0.0781906	-4.59482
PPFIA4	0.871204	-0.80703	1.82595	0.0781911	-4.09915
KCNC2	1.70847	2.21099	1.82577	0.0782195	-4.26586
C13orf34	0.674835	1.37177	1.82526	0.078298	-4.19951
ZNF146	0.375953	6.78411	1.82517	0.0783121	-4.68851
PRKCD	0.345043	7.12789	1.825	0.078338	-4.6829
ADAM28	0.86323	1.84286	1.8249	0.0783549	-4.2342
C11orf17	0.289304	3.65318	1.82409	0.0784792	-4.45094
GLIPR1	0.725194	3.89361	1.82274	0.0786898	-4.48899
ANKRD29	0.810663	2.90342	1.82206	0.0787959	-4.34862
COL8A1	1.12885	3.19693	1.82179	0.0788364	-4.38829
TMEM57	0.314904	6.26329	1.82122	0.0789261	-4.69188
MDM1	0.336233	3.3785	1.82103	0.0789554	-4.41529
ZBTB43	0.523631	4.01456	1.82057	0.0790267	-4.5104
GATA2	0.564658	7.40272	1.82005	0.0791082	-4.68326
UBA3	0.283874	5.58172	1.81936	0.0792169	-4.67009
HIST1H1E	0.980887	-0.180456	1.81911	0.0792561	-4.12813
ARL2BP	0.277711	5.77053	1.819	0.0792722	-4.67968
DPM1	0.240128	4.58195	1.81812	0.0794108	-4.59016
ABCD1	0.466542	4.42483	1.8178	0.0794611	-4.57166
PGAM4	0.471923	0.621748	1.81667	0.0796375	-4.16741
PIK3R4	0.370732	5.51204	1.81659	0.0796504	-4.67082
KLF13	0.512427	5.53654	1.81635	0.0796888	-4.67255
SPIN3	0.372996	4.30306	1.81625	0.0797034	-4.55825
MED13L	0.607849	6.36519	1.81566	0.0797966	-4.70267
YTHDC2	0.459006	5.32577	1.81504	0.0798948	-4.66218
HNRNPH1	0.315746	7.6277	1.81481	0.0799304	-4.68389
DSTYK	0.309395	4.83306	1.81455	0.0799711	-4.62285
VAT1	0.37678	7.06301	1.81453	0.0799752	-4.70135
PAIP1	0.263919	5.8652	1.81444	0.0799886	-4.69097
GNG10	0.471423	5.36668	1.81393	0.0800697	-4.66656
ZNF468	0.398911	4.48408	1.81388	0.0800773	-4.58531
SLA2	0.652827	0.528747	1.81368	0.0801088	-4.16677
SNX27	0.338012	5.76516	1.81353	0.080132	-4.68828
RPAP2	0.253906	3.79346	1.81315	0.0801926	-4.48913
RBAK	0.363806	4.51237	1.81314	0.0801935	-4.58993
MRPL3	0.321005	6.5557	1.81303	0.080212	-4.7088
TANC1	0.646762	6.03289	1.81266	0.0802697	-4.69975
TBC1D5	0.32591	5.991	1.81263	0.080275	-4.69845
ATXN10	0.216444	7.11083	1.81246	0.0803021	-4.70363
NSD1	0.432544	6.34315	1.81185	0.0803978	-4.70849
PHC3	0.385961	6.1616	1.81167	0.080426	-4.70499
MX1	0.91646	5.20672	1.81111	0.080516	-4.6603
TUBB4	0.777085	2.72729	1.81069	0.0805818	-4.34419
C16orf63	0.19324	5.07223	1.81039	0.0806298	-4.65109
NUP205	0.432037	5.77538	1.81008	0.0806791	-4.6943
CCDC59	0.271343	4.13365	1.80835	0.0809535	-4.54715
PRPF3	0.421782	5.15323	1.80807	0.0809981	-4.66122
KSR2	0.699736	1.38809	1.80713	0.0811492	-4.22672
ZBTB12	0.426313	2.77697	1.80511	0.0814722	-4.35866
ALDH3B1	0.557618	2.20809	1.80444	0.081578	-4.29732
RAB7A	0.262226	8.02192	1.80369	0.0816987	-4.68598
C3orf63	0.304519	5.9332	1.8035	0.0817294	-4.71118
TTC13	0.470231	3.39279	1.80327	0.0817658	-4.44493
YTHDF1	0.240769	6.17814	1.8031	0.0817934	-4.71923
CYTH3	0.550051	5.454	1.80234	0.0819156	-4.69048
SLAMF7	0.873702	2.03152	1.80208	0.0819583	-4.28411
STOX1	0.727355	1.39234	1.80196	0.0819769	-4.23441
ATAD2	0.578822	5.23947	1.79991	0.0823074	-4.6806
ATAD2B	0.375245	3.87721	1.79989	0.0823109	-4.5225
CADPS2	0.373403	5.88685	1.79934	0.0824001	-4.71613
FCER1G	0.586896	2.83741	1.79923	0.0824175	-4.37505
FBXO3	0.242361	5.18486	1.79911	0.0824379	-4.67795
CDC42BPA	0.435679	6.43658	1.79858	0.0825238	-4.73115
SERAC1	0.291321	3.67962	1.7983	0.0825676	-4.49526
C16orf91	0.350405	3.56028	1.79701	0.082778	-4.47938
KRAS	0.438754	5.39688	1.7966	0.0828434	-4.69625
AHRR	0.894409	0.173006	1.79605	0.0829331	-4.17381
COL4A5	0.444803	5.82328	1.79588	0.0829616	-4.71914
CRISPLD1	1.07011	5.20642	1.79418	0.0832375	-4.68738
EME1	0.78898	-0.0888911	1.79344	0.0833593	-4.16605
PEX11A	0.415811	4.18327	1.79305	0.0834219	-4.57841
TAGLN2	0.431761	7.18945	1.79239	0.0835304	-4.73399
NAA40	0.358136	4.00724	1.79215	0.0835698	-4.5541
MDK	0.658333	7.15856	1.79214	0.0835722	-4.73518
SNX30	0.514849	4.22277	1.79196	0.0836006	-4.5857
SAMD3	0.812691	-0.686721	1.79106	0.0837489	-4.14784
ELF5	1.09319	1.91164	1.79052	0.0838375	-4.29034
GRIP1	0.636364	2.60108	1.79047	0.0838448	-4.35982
LRRC4B	1.28207	0.647869	1.78767	0.0843061	-4.20903
SLC9A3	1.38042	-0.221273	1.78669	0.0844677	-4.16973
MS4A1	1.55129	-0.324421	1.78604	0.0845753	-4.16667
ZNF682	0.460697	2.54572	1.78534	0.0846899	-4.36117
LNX2	0.396073	4.79114	1.78388	0.0849322	-4.66746
CCT2	0.271372	7.25193	1.78382	0.0849423	-4.74601
LIMS1	0.788385	3.72516	1.78376	0.0849533	-4.52472
SLAMF6	0.841289	0.998182	1.78336	0.0850197	-4.23538
AKTIP	0.25324	4.93775	1.78286	0.0851022	-4.68334
PDCD10	0.314095	4.85903	1.78263	0.0851394	-4.67624
ENTPD1	0.339632	5.18621	1.78169	0.0852964	-4.70578
AKR1C2	1.17875	0.562097	1.78144	0.0853381	-4.21294
RIPK2	0.429383	4.87347	1.78142	0.0853417	-4.67956
AKIRIN2	0.242635	4.47874	1.78139	0.0853472	-4.63613
NR2C2	0.60548	5.30118	1.78077	0.0854507	-4.71538
IGFBP7	0.473902	7.95589	1.78068	0.0854649	-4.72544
NOS1AP	0.868657	1.11947	1.77978	0.0856158	-4.24799
RBBP4	0.417947	7.45146	1.77845	0.0858383	-4.74847
FANCA	0.723923	1.20859	1.77843	0.0858418	-4.25564
EBI3	0.638788	0.435107	1.77812	0.0858928	-4.21081
NAA20	0.228082	5.71237	1.77615	0.0862237	-4.74575
SLC39A1	0.28136	7.12341	1.77577	0.0862871	-4.76214
PARP14	0.499125	6.36751	1.77489	0.0864364	-4.76813
PRPF38A	0.199699	5.48008	1.77432	0.0865319	-4.73666
FEM1B	0.270497	6.23415	1.77323	0.086715	-4.76831
TMEM188	0.306035	3.11475	1.77098	0.0870964	-4.45458
RIOK2	0.265887	4.47948	1.77091	0.0871087	-4.65267
CD200	0.549433	2.69365	1.77074	0.0871372	-4.40014
MTERF	0.273686	3.14185	1.77037	0.0871989	-4.45928
ATP6V1A	0.360995	6.66865	1.77032	0.0872086	-4.77734
CDC6	0.785122	2.18281	1.77027	0.0872159	-4.34506
ERP27	0.907057	1.93259	1.77025	0.0872199	-4.32156
CACNB3	0.420636	4.08043	1.76994	0.0872728	-4.59961
PAPOLA	0.248055	7.53719	1.76983	0.087292	-4.75917
HIATL1	0.33997	5.80791	1.76977	0.0873021	-4.76011
ELOVL2	0.901529	4.16239	1.76974	0.0873075	-4.61188
ETV3	0.897432	2.83666	1.769	0.0874321	-4.42043
LUC7L2	0.300548	6.88344	1.76865	0.0874913	-4.77808
GPRC5A	0.890723	3.85005	1.76825	0.08756	-4.56759
SFRP2	0.719566	4.86914	1.76816	0.0875751	-4.70005
RPL30	0.390179	9.82854	1.76771	0.0876519	-4.67128
TRERF1	0.590318	3.62028	1.7674	0.0877054	-4.53405
ZNF528	0.359887	4.26825	1.76735	0.0877134	-4.63052
TOR1B	0.474503	5.56127	1.76628	0.0878964	-4.75385
IMPAD1	0.336961	7.4608	1.76621	0.0879085	-4.76757
AIF1L	0.366054	4.78162	1.76603	0.0879382	-4.6946
TATDN1	0.330972	3.96735	1.76536	0.0880531	-4.58978
FSCN1	0.536834	3.78065	1.76524	0.0880746	-4.56171
FANCD2	0.479338	3.05611	1.76474	0.0881599	-4.45587
TMCO1	0.238367	6.92501	1.76464	0.0881765	-4.78378
UBXN2B	0.421567	5.30864	1.76429	0.0882374	-4.74194
AKAP12	0.75838	5.73788	1.76323	0.0884182	-4.76738
ZNF586	0.291133	3.47384	1.76306	0.0884472	-4.51862
ZNF805	0.247159	3.78281	1.76299	0.0884593	-4.56549
CD109	0.565677	3.67176	1.7627	0.0885098	-4.54906
ZNF93	0.751389	1.75526	1.76215	0.0886047	-4.31806
GNA12	0.281769	6.33168	1.76212	0.08861	-4.7878
CMTM7	0.464059	3.29611	1.76131	0.0887495	-4.49506
CELF1	0.391937	6.44304	1.76101	0.0888012	-4.79109
ARHGAP5	0.383446	6.442	1.76039	0.0889072	-4.79205
KLHL7	0.315503	5.16401	1.75992	0.0889885	-4.73849
G3BP1	0.382142	6.76655	1.75943	0.0890722	-4.79401
DENR	0.22785	6.46712	1.75804	0.0893126	-4.79601
CCNB1	0.566145	3.51998	1.75804	0.0893138	-4.5332
SEMA6C	0.527665	2.89258	1.75797	0.0893256	-4.4441
SUDS3	0.258157	6.25134	1.75729	0.0894429	-4.79391
SMAD5	0.420475	6.21388	1.75704	0.0894859	-4.79347
GNPTAB	0.515829	6.08514	1.75673	0.0895406	-4.7906
RNF216L	0.242191	3.68085	1.75665	0.0895547	-4.5597
HIST1H3H	0.829583	0.266179	1.75615	0.0896418	-4.23189
CDC7	0.623452	1.27913	1.75606	0.089657	-4.29172
EIF5	0.273462	7.32001	1.75597	0.0896731	-4.78821
CCNK	0.222952	5.39083	1.7556	0.0897367	-4.76087
ZNF287	0.255757	3.076	1.7553	0.0897885	-4.47278
NSL1	0.218299	4.74774	1.75446	0.0899358	-4.70916
LOC728875	0.714603	1.66618	1.75349	0.0901038	-4.32327
BACH2	0.658171	1.53422	1.75334	0.0901305	-4.3135
BRAF	0.499374	3.48117	1.75302	0.0901869	-4.53499
COPS5	0.333157	5.80323	1.75208	0.0903511	-4.78782
GRPEL2	0.333212	4.31763	1.75198	0.0903675	-4.66114
CENPJ	0.406416	2.65562	1.75071	0.0905913	-4.42522
OLA1	0.256821	6.37453	1.75041	0.0906424	-4.80693
ATP6V1B1	1.27345	0.000700156	1.75037	0.0906509	-4.22695
BLM	0.632873	0.797889	1.75012	0.0906935	-4.26915
KIF21B	0.842254	1.58376	1.74867	0.0909479	-4.32377
CNOT4	0.225511	4.50684	1.74849	0.090981	-4.691
GMCL1	0.620084	4.20841	1.74848	0.0909823	-4.65142
SNRNP40	0.23943	5.43583	1.74696	0.09125	-4.77716
TFPI	0.754517	3.23449	1.74662	0.0913091	-4.50825
TMSB10	0.597482	8.52562	1.74622	0.0913808	-4.75666
SUV39H1	0.401203	3.28757	1.74578	0.0914576	-4.51722
C20orf112	0.308698	4.31988	1.74575	0.0914634	-4.67109
RPS6KL1	0.931421	0.85777	1.74528	0.0915471	-4.2794
SUMO1P3	0.26941	3.14901	1.74494	0.0916065	-4.49852
CDK8	0.47801	2.85425	1.74477	0.0916374	-4.45872
SLCO4A1	0.780084	0.749813	1.74473	0.0916433	-4.27363
ZNF583	0.377515	2.41495	1.74411	0.0917531	-4.40733
YIPF6	0.590323	4.37026	1.74381	0.0918068	-4.68084
PFDN2	0.319519	5.26069	1.74313	0.0919282	-4.77183
PPIP5K2	0.415641	5.21724	1.74234	0.0920684	-4.76995
PGAM5	0.344983	4.44946	1.74207	0.0921159	-4.69375
IFIT2	0.631863	3.32027	1.74194	0.0921383	-4.52778
RCSD1	0.604331	2.74202	1.74141	0.0922336	-4.44945
RPAP3	0.249731	4.77242	1.74094	0.0923168	-4.7328
ZNF75D	0.397878	4.56014	1.74088	0.0923279	-4.70921
FCGR2B	0.917019	0.925676	1.74083	0.0923356	-4.28968
COL5A1	0.541693	5.90088	1.7408	0.0923415	-4.80943
GMNN	0.708734	4.80787	1.73967	0.0925424	-4.73843
TRMT12	0.309508	4.3922	1.73938	0.0925942	-4.69054
LOC651250	0.271573	6.15522	1.73786	0.0928666	-4.82213
CTPS2	0.259443	5.30692	1.73741	0.0929466	-4.78391
ZNF800	0.429487	4.48284	1.73663	0.0930866	-4.70635
VPS37D	0.522863	2.37565	1.73595	0.0932083	-4.41488
TTC26	0.536252	2.18223	1.73522	0.0933402	-4.39572
GOLIM4	0.906753	4.6781	1.73519	0.0933457	-4.73156
HNRNPD	0.199261	7.5377	1.73502	0.0933768	-4.81385
PCGF6	0.388059	2.63931	1.73481	0.0934141	-4.44659
RFC4	0.394078	3.08077	1.73474	0.0934259	-4.5041
RRP1B	0.23931	5.43921	1.73454	0.0934617	-4.79673
NFXL1	0.540569	4.05148	1.73424	0.0935163	-4.6503
GAPVD1	0.313475	5.57034	1.73395	0.0935685	-4.80503
ZCCHC18	0.716739	-1.0546	1.73354	0.0936429	-4.20949
CAPRIN1	0.289875	8.16434	1.73335	0.0936765	-4.79124
ZNF320	0.340779	4.92323	1.73329	0.0936878	-4.75962
ATXN2L	0.329678	6.76023	1.73258	0.093815	-4.83621
C1orf55	0.422236	4.80057	1.73222	0.0938808	-4.74923
HSPD1	0.34849	8.68117	1.73199	0.093922	-4.77264
PCDHAC2	1.31137	-0.840214	1.73166	0.0939817	-4.21841
ZMYM3	0.315216	6.00513	1.73107	0.0940878	-4.8283
ELN	0.613204	6.0548	1.73101	0.0940999	-4.82999
PAR-SN	0.46732	3.16723	1.73078	0.0941405	-4.52222
PLXNC1	1.29398	0.870162	1.72994	0.0942943	-4.30106
SIT1	0.833648	0.113391	1.72969	0.094338	-4.25938
PYGL	0.81118	4.68197	1.72925	0.0944194	-4.74116
NUDT3	0.337023	4.26228	1.72853	0.0945487	-4.68962
CSNK2A1P	0.647742	4.14387	1.72822	0.0946064	-4.67317
SNX3	0.292898	6.74594	1.72789	0.0946658	-4.84365
RELT	0.567822	1.25035	1.7275	0.0947371	-4.32939
MFSD2A	0.79029	-0.166515	1.72723	0.094785	-4.24965
ZNF791	0.60111	3.46992	1.72663	0.0948948	-4.57307
RXRA	0.356564	6.59941	1.72629	0.0949569	-4.84653
RFC3	0.436577	3.56028	1.7261	0.0949925	-4.5876
LOC647979	0.26141	8.78994	1.72603	0.0950036	-4.77757
ERO1LB	0.648964	4.72418	1.72591	0.0950265	-4.75089
PCDHA12	1.1253	-0.486682	1.72589	0.0950299	-4.2382
OAS1	0.837683	4.50908	1.72518	0.0951589	-4.72722
ZSWIM4	0.36397	3.74827	1.72511	0.0951719	-4.61791
LOC284441	0.640219	1.65854	1.72483	0.0952243	-4.36305
RNASEL	0.329121	3.91517	1.72437	0.095308	-4.64461
PKIB	0.746575	3.69143	1.72418	0.0953419	-4.61057
TRIM52	0.458491	3.25382	1.72264	0.0956252	-4.54686
HEATR2	0.250298	5.08712	1.72176	0.0957865	-4.79182
MLXIP	0.437183	5.49663	1.72121	0.0958868	-4.82074
UQCRHL	0.380925	4.6598	1.71983	0.0961406	-4.75314
RFX6	1.22408	-0.674587	1.71913	0.0962706	-4.23974
FOXK1	0.475437	5.33922	1.71844	0.0963978	-4.81544
FCGR3A	0.710695	3.81134	1.7182	0.0964421	-4.638
C5orf51	0.302274	5.43299	1.71812	0.0964565	-4.8218
NTRK2	0.684129	3.01337	1.7181	0.0964609	-4.51932
SR140	0.235672	6.49787	1.71709	0.0966469	-4.8603
MDC1	0.346156	5.05855	1.71675	0.0967099	-4.79715
HAVCR2	0.572977	2.15401	1.71674	0.096713	-4.41928
SNX29	0.378891	4.30015	1.71615	0.0968225	-4.71377
ALCAM	0.430018	7.89298	1.71601	0.0968468	-4.8293
C9orf80	0.318943	3.33237	1.71599	0.0968519	-4.56831
TMEM14A	0.294713	4.52566	1.71545	0.0969522	-4.74416
SOX6	0.530602	0.387025	1.71498	0.0970389	-4.29283
EHD3	0.428537	3.9131	1.71483	0.0970675	-4.65872
ZNF536	1.04302	-0.768258	1.71457	0.0971141	-4.24212
C11orf57	0.270104	5.14644	1.71442	0.0971433	-4.80788
LOC220729	0.437149	2.24042	1.71432	0.0971622	-4.43159
NBPF1	0.527344	4.9552	1.71317	0.0973748	-4.7936
UBQLN1	0.276984	7.41636	1.71303	0.097401	-4.85213
PLCG1	0.286171	6.24663	1.71216	0.0975631	-4.86425
SKAP1	0.774079	0.703218	1.71202	0.0975898	-4.31494
HMGA1	0.418607	5.36321	1.71192	0.0976093	-4.82703
ZNF14	0.307113	3.76754	1.71159	0.0976701	-4.64122
LY86	0.630402	1.51408	1.71055	0.0978655	-4.37176
RASSF3	1.25299	4.1007	1.71033	0.0979064	-4.69397
LOC727896	0.436813	0.508195	1.70994	0.0979779	-4.30624
SLC5A3	0.373862	4.49912	1.70993	0.0979816	-4.74931
XPR1	0.348442	5.14582	1.70981	0.0980033	-4.81491
ZNF555	0.350849	1.92327	1.70916	0.0981251	-4.4077
GORAB	0.334478	3.15117	1.70873	0.0982048	-4.55251
ZNF738	0.395931	3.07318	1.70818	0.0983082	-4.54222
GK3P	0.872388	-0.886101	1.70712	0.0985082	-4.24733
HEATR1	0.480152	5.17499	1.70706	0.0985195	-4.82136
ATM	0.428717	5.47356	1.7068	0.0985674	-4.84163
TMEM194B	0.31613	1.85233	1.70662	0.0986015	-4.40482
CDC27	0.266763	5.63121	1.70602	0.0987144	-4.85138
UIMC1	0.250365	4.25183	1.70566	0.0987839	-4.72298
GRSF1	0.205856	6.9183	1.70453	0.0989963	-4.87772
CTHRC1	0.99528	1.9036	1.70448	0.0990064	-4.41246
FAM188B	0.317246	3.77668	1.70443	0.0990154	-4.65335
ZNF696	0.462412	3.83205	1.70435	0.0990306	-4.662
EGLN1	0.283604	5.77979	1.70331	0.0992262	-4.86257
CLIP2	0.433748	4.54602	1.70322	0.0992445	-4.76526
JAK2	0.347034	3.57843	1.70262	0.0993578	-4.62546
LOC646762	0.319961	3.46426	1.70214	0.099448	-4.60868
MAP3K5	0.506515	5.97581	1.70212	0.0994515	-4.87209
MICB	0.551044	0.28999	1.70203	0.0994697	-4.30458
ZWILCH	0.391678	3.50398	1.7017	0.0995325	-4.6154
HCN3	0.549229	1.93379	1.70143	0.0995829	-4.41951
PTPN11	0.375753	6.85117	1.70093	0.0996782	-4.88426
CCDC117	0.266017	5.24102	1.70013	0.0998309	-4.83684
PFN2	0.370978	7.21454	1.69971	0.0999107	-4.87867
RFWD2	0.220453	5.32148	1.69953	0.099944	-4.84332
C16orf54	0.835999	1.20323	1.69948	0.0999535	-4.36445
TOR1AIP1	0.305305	6.32864	1.69912	0.100022	-4.8859
LPCAT1	0.3704	6.2426	1.6991	0.100026	-4.88427
RBM27	0.409084	5.43938	1.69905	0.100036	-4.8515
RAC2	0.573925	3.71925	1.6986	0.100121	-4.65317
GAPT	0.716987	0.193317	1.6984	0.10016	-4.3042
FAM18B2	0.303109	4.02285	1.69809	0.100218	-4.70068
NR2C1	0.323831	3.70292	1.69791	0.100253	-4.65167
CCNB2	0.629872	2.56271	1.69769	0.100295	-4.49115
SCLT1	0.535823	2.23181	1.69762	0.100309	-4.45439
CCDC121	0.445711	2.55982	1.69701	0.100426	-4.49179
FAM53A	0.619803	0.698281	1.69633	0.100555	-4.33553
ZNF148	0.385559	5.86539	1.69626	0.100569	-4.87697
CSF1	0.423513	3.70119	1.69602	0.100615	-4.65422
NAT10	0.19257	5.98816	1.69526	0.10076	-4.88303
HESX1	0.584078	-0.772563	1.69426	0.100951	-4.26711
PHF20L1	0.410871	5.39388	1.69365	0.10107	-4.85697
PPM1L	0.732025	1.61583	1.69355	0.101088	-4.40307
GEM	0.59945	3.99039	1.69334	0.101129	-4.70284
TRUB1	0.492406	4.70062	1.69323	0.101151	-4.79826
HMGCS1	0.503484	6.49714	1.6931	0.101174	-4.89724
CBL	0.415837	4.49165	1.6928	0.101233	-4.77435
TFB2M	0.336909	4.36867	1.69162	0.10146	-4.76023
C19orf52	0.223964	3.54328	1.6916	0.101464	-4.63637
NUP160	0.382633	5.37388	1.69121	0.101539	-4.85941
GBP5	0.956356	1.87122	1.69104	0.101573	-4.42824
MED30	0.417044	2.92931	1.69028	0.101718	-4.54836
HSD17B4	0.57276	8.17152	1.69025	0.101725	-4.85724
ASF1A	0.314544	4.38043	1.69017	0.10174	-4.76398
ZNF530	0.381934	1.66485	1.69006	0.101762	-4.41182
CD3E	0.676987	3.10035	1.68902	0.101962	-4.57405
MATR3	0.234306	8.44895	1.68864	0.102035	-4.84838
LRRC8C	0.465524	3.19913	1.68854	0.102055	-4.58903
SSH3	0.338917	5.99154	1.68844	0.102075	-4.89358
TTYH2	0.41695	2.1123	1.68802	0.102155	-4.4556
PRRC1	0.384096	6.7879	1.68738	0.10228	-4.90572
VIPAR	0.206751	4.48134	1.68671	0.102411	-4.78224
RNF130	0.215047	6.13052	1.6856	0.102627	-4.90216
CRIP2	0.605217	5.91666	1.68508	0.102727	-4.89604
HPS5	0.3372	4.28463	1.68402	0.102934	-4.76014
GZF1	0.228413	4.35697	1.68392	0.102954	-4.77024
FAM76B	0.440614	3.80378	1.68363	0.10301	-4.6885
ZNF643	0.539724	0.860497	1.68316	0.103103	-4.36326
ZFP41	0.51462	4.1455	1.68305	0.103123	-4.7416
RAB10	0.288046	7.2321	1.68282	0.103169	-4.904
ZSCAN22	0.322178	2.53381	1.68277	0.103178	-4.50901
IFIH1	0.44572	4.9718	1.68264	0.103204	-4.84163
TIGIT	0.884711	0.359126	1.68226	0.103279	-4.3341
GATM	0.610354	2.88436	1.68215	0.103301	-4.55404
LRMP	0.652203	0.988795	1.68181	0.103366	-4.37354
TBL1X	0.262383	6.27398	1.68169	0.103391	-4.91154
TMEM39A	0.30983	4.97627	1.68167	0.103395	-4.84351
PTBP1	0.233508	8.00009	1.6813	0.103466	-4.87795
PLAU	0.540919	3.2293	1.68103	0.10352	-4.60441
LOC728024	0.434475	-0.301686	1.68083	0.103559	-4.30274
PAG1	0.519087	4.08419	1.67948	0.103824	-4.73779
GNB5	0.321293	4.56089	1.67935	0.103849	-4.8031
NRSN2	0.52304	5.00087	1.6791	0.103899	-4.84961
BTF3L4	0.219902	5.50648	1.67904	0.103911	-4.88588
ZNF441	0.36032	3.33023	1.67877	0.103964	-4.62274
ZNF649	0.474824	5.09512	1.67623	0.104464	-4.86195
BEND3	0.673549	3.56469	1.6754	0.104629	-4.66352
KCTD20	0.541459	5.77302	1.67378	0.104949	-4.9073
TTPAL	0.254482	4.54081	1.67339	0.105026	-4.80961
RNF20	0.255527	6.4073	1.67257	0.10519	-4.92759
MKRN1	0.189122	7.35742	1.67251	0.105202	-4.91598
COG1	0.232289	5.66688	1.67245	0.105214	-4.90434
SLC6A11	1.25734	1.51527	1.67241	0.105221	-4.4241
CHST1	0.4497	0.36117	1.67184	0.105335	-4.3477
PLEKHA3	0.313159	4.078	1.67143	0.105417	-4.74883
HLA-DPA1	0.465584	7.20277	1.67134	0.105435	-4.92224
ZBTB34	0.391545	3.69413	1.67068	0.105565	-4.69056
YY2	0.648222	0.458103	1.66937	0.105827	-4.35648
LY75	0.7476	2.19668	1.66912	0.105877	-4.49069
ACTG1	0.303556	11.4567	1.66855	0.105992	-4.75205
TLR9	0.615288	-0.509942	1.6685	0.106	-4.30909
MGAT4B	0.300046	6.41515	1.66829	0.106043	-4.93417
NLRP1	0.517839	2.98132	1.66714	0.106273	-4.58882
NAB1	0.331169	4.70532	1.66693	0.106315	-4.83837
RASSF5	0.474988	3.90084	1.66593	0.106516	-4.72972
RHBDF2	0.435377	3.27663	1.66559	0.106585	-4.63385
SGTB	0.361269	3.42807	1.66437	0.106829	-4.65855
MBD5	0.393142	3.66815	1.6642	0.106863	-4.696
EFNA3	0.445932	2.27243	1.66352	0.107001	-4.50657
FAM125B	0.328128	4.39569	1.66241	0.107226	-4.80753
C17orf80	0.216673	4.62194	1.6624	0.107228	-4.83569
EIF2S3	0.233705	7.96625	1.66165	0.107378	-4.90904
VDAC3	0.307769	6.23577	1.66115	0.10748	-4.94185
S1PR3	0.674888	4.58717	1.66103	0.107505	-4.83363
EIF3C	0.994522	2.65752	1.66087	0.107535	-4.555
PAQR3	0.434068	3.61718	1.66038	0.107636	-4.69364
TRNP1	0.552079	2.86749	1.66019	0.107675	-4.58318
RAD51	0.695061	0.7966	1.66007	0.107697	-4.38955
ELK3	0.770578	3.24008	1.65914	0.107888	-4.6377
LY96	0.6743	0.505599	1.65887	0.107942	-4.37289
ZNF124	0.607654	1.56079	1.65832	0.108054	-4.44675
ALOX15	1.65988	0.831893	1.65699	0.108323	-4.3959
PAPOLG	0.334066	3.91407	1.65626	0.108472	-4.74598
CYCS	0.265548	6.74565	1.65616	0.108493	-4.9534
PDE1B	0.576273	0.444452	1.65555	0.108618	-4.37353
HERC3	0.59657	6.13785	1.65443	0.108847	-4.94952
ZNF34	0.365241	2.42903	1.65433	0.108866	-4.53684
MEAF6	0.43096	7.19152	1.65425	0.108884	-4.9483
USP31	0.350173	4.81243	1.65406	0.108922	-4.86903
NIPSNAP3A	0.350165	4.97791	1.65406	0.108922	-4.88512
PCBP2	0.217618	8.78037	1.65319	0.1091	-4.88851
ZFAND3	0.234652	6.47074	1.65241	0.10926	-4.95869
WHSC1L1	0.356805	5.5263	1.65223	0.109297	-4.92736
KIF26B	0.657609	0.616339	1.65148	0.10945	-4.38923
GOPC	0.272814	5.30984	1.65109	0.109532	-4.91576
SF3B2	0.14298	7.92766	1.65024	0.109705	-4.92774
PDE7A	0.358397	4.93816	1.64994	0.109768	-4.88757
CASP8	0.368212	4.3953	1.64982	0.109794	-4.82613
OSBPL1A	0.316005	5.54543	1.64975	0.109808	-4.93214
CCDC92	0.228443	5.35752	1.64958	0.109843	-4.92116
DNAJC21	0.27608	5.92554	1.64947	0.109866	-4.95015
CCR7	1.04936	1.11641	1.64928	0.109905	-4.42559
ZKSCAN4	0.329858	2.30911	1.64882	0.11	-4.531
LOC653653	0.63946	0.971227	1.64841	0.110084	-4.41656
SNRK	0.353377	5.41034	1.64719	0.110334	-4.92807
SLC25A17	0.260362	5.42406	1.6469	0.110395	-4.92936
SPOCK2	0.753157	4.89744	1.6466	0.110458	-4.88863
ZNF880	0.520738	3.7479	1.64639	0.1105	-4.73445
IER5	0.558199	3.65816	1.64583	0.110618	-4.72119
SOCS5	0.316335	4.68485	1.64552	0.110681	-4.86796
GON4L	0.342656	5.35219	1.64539	0.110708	-4.92706
N4BP2L1	0.582673	3.34878	1.64505	0.110779	-4.67433
RSAD2	0.682493	2.80646	1.64409	0.110978	-4.5978
LY9	0.817165	0.113588	1.64305	0.111195	-4.3707
SCRN3	0.306409	4.29852	1.64277	0.111254	-4.82331
TWF1	0.339768	6.54139	1.64228	0.111354	-4.9744
C20orf118	0.720398	-0.735723	1.64219	0.111374	-4.33195
LOC92973	0.493197	1.34152	1.64189	0.111436	-4.45186
TXLNG	0.609057	2.57499	1.6413	0.11156	-4.5723
FYB	0.70088	3.00902	1.64079	0.111665	-4.63024
HTRA2	0.215407	4.90205	1.64074	0.111676	-4.89776
ENTPD3	0.776612	1.86288	1.64055	0.111717	-4.49676
STXBP3	0.256023	5.42949	1.64041	0.111746	-4.93936
C17orf71	0.300075	4.41673	1.63997	0.111838	-4.84346
PTPN22	0.750022	-0.0313515	1.63993	0.111846	-4.36694
TIMM17A	0.302331	5.56158	1.63893	0.112054	-4.94915
AGK	0.251811	4.91191	1.63877	0.112088	-4.90163
C18orf10	0.20954	5.32666	1.63853	0.112139	-4.93559
PHF5A	0.244238	4.32798	1.63808	0.112233	-4.83428
FGF1	0.599502	1.13378	1.63792	0.112266	-4.44179
TMED7-TICAM2	1.14495	1.64338	1.63756	0.112343	-4.48143
VPS72	0.216851	5.69172	1.63704	0.112452	-4.95864
FYN	0.443582	3.50448	1.63677	0.112507	-4.71021
TMEM132A	0.609696	5.48678	1.63672	0.112519	-4.94825
CDK2	0.332581	4.69048	1.63628	0.112611	-4.88224
PGK1	0.319683	8.11091	1.63626	0.112615	-4.94088
NFKBIL2	0.547852	3.18099	1.63604	0.112661	-4.66195
PIK3CA	0.48375	3.89253	1.63579	0.112714	-4.77249
FAM117B	0.589369	5.84515	1.63568	0.112737	-4.96753
LOC729234	0.678015	1.1949	1.63554	0.112767	-4.44937
ZNF213	0.256286	5.02164	1.63547	0.112782	-4.91662
USP11	0.26258	6.29843	1.63546	0.112784	-4.98158
ZNF619	0.523668	1.56763	1.63545	0.112785	-4.47802
CHAC2	0.513927	0.710313	1.635	0.112881	-4.41652
EXOC6B	0.733567	2.66359	1.63496	0.112889	-4.59212
SNX24	0.389466	2.46869	1.63481	0.11292	-4.56858
LASS6	0.63592	5.28095	1.6341	0.11307	-4.93902
STT3B	0.542527	6.18394	1.63397	0.113098	-4.98129
PKP4	0.229052	6.36573	1.6332	0.11326	-4.98609
CDK4	0.213574	6.79303	1.63294	0.113316	-4.9877
COPS3	0.228037	5.73194	1.63261	0.113385	-4.96712
ESYT2	0.273755	6.7832	1.63154	0.113613	-4.98988
NEFL	1.50269	-0.408908	1.6315	0.113621	-4.35892
FRZB	0.601018	3.93868	1.63147	0.113626	-4.78595
CAMLG	0.218312	5.69939	1.63141	0.113639	-4.96736
ITPKA	0.808055	-1.38262	1.62957	0.11403	-4.32378
ADNP2	0.314462	4.972	1.62932	0.114083	-4.92125
ITSN1	0.303133	4.98196	1.62919	0.114111	-4.92236
ARL10	0.660437	-0.326669	1.6287	0.114215	-4.36617
CKLF	0.318489	3.05071	1.62867	0.114222	-4.65333
ZC3HAV1	0.309624	5.69331	1.62768	0.114432	-4.97259
PRPF38B	0.241484	5.8694	1.62644	0.114696	-4.98222
ZSCAN23	0.984053	1.14631	1.62618	0.114751	-4.4581
TTC33	0.340626	4.22769	1.62578	0.114838	-4.83809
PPP1R12A	0.309768	6.33627	1.62541	0.114917	-4.99718
CCDC144A	1.12855	-1.36151	1.62517	0.114968	-4.32953
PLD6	0.372675	4.36558	1.62483	0.11504	-4.85881
BCL2	0.552773	4.32908	1.62483	0.115042	-4.85381
PIGY	0.216609	6.61525	1.62466	0.115078	-5.00082
BMPR2	0.399394	6.83621	1.6242	0.115175	-5.00017
LRRC37B	0.360982	2.60394	1.62411	0.115195	-4.59973
MED20	0.206446	4.5051	1.6228	0.115475	-4.87999
SNX10	0.547425	2.78986	1.62275	0.115488	-4.62549
DFNB31	0.357324	4.18203	1.62257	0.115525	-4.83607
RCBTB1	0.521223	5.08698	1.62256	0.115527	-4.94122
ZNF286B	0.459638	0.241295	1.62233	0.115577	-4.40385
GPR176	1.10877	3.09295	1.62214	0.115618	-4.66865
RHOQ	0.242169	6.13597	1.62204	0.11564	-4.99771
DDC	0.96904	-0.265875	1.62195	0.115659	-4.37735
PPP2R2B	0.812397	-0.232837	1.62176	0.115699	-4.3792
THEMIS	0.90982	-0.27238	1.62173	0.115706	-4.3773
ZNF621	0.310721	4.86557	1.6213	0.115799	-4.92283
MSH2	0.386502	4.84767	1.62113	0.115836	-4.92129
PARP1	0.309458	7.59978	1.62066	0.115937	-4.985
HGSNAT	0.344115	6.88547	1.62035	0.116003	-5.00519
STRN	0.866682	3.50066	1.61904	0.116287	-4.73497
SEC22A	0.217102	4.07953	1.61797	0.116518	-4.82731
INVS	0.349715	3.76785	1.61781	0.116552	-4.77883
KIAA0895	0.393058	3.59157	1.61744	0.116631	-4.75153
C1QC	0.66617	5.39379	1.6174	0.116641	-4.97114
CCDC102B	0.430017	0.305046	1.61721	0.116683	-4.41399
CD27	0.7679	1.49212	1.6167	0.116793	-4.49688
KYNU	0.759445	-0.486877	1.61503	0.117155	-4.37531
UBFD1	0.280947	6.46734	1.61494	0.117174	-5.01436
LTBP1	0.604311	6.7637	1.61455	0.11726	-5.01518
[truncated: 12,898 more rows]
