# Supplementary material for: Implications of the KHDC4-TRAF2 axis in the context of prostate cancer prognosis
Source: Aging (Albany NY). 2025 Jun 23;17(6):1544–70. doi: 10.18632/aging.206273 (PMC12245195; doi:10.18632/aging.206273)
Supplement: Supplementary Table 2 [file aging-17-206273-s003.xlsx]

## Sheet: Supplementary Table 2
Supplementary Table 2. Correlation of expression between KHDC4 and TRAF2 in TCGA-PRAD transcriptome profiles.
samples	sample_type	KIAA0907	TRAF2
TCGA-G9-6362-11	Solid Tissue Normal	10.88	9.253
TCGA-HC-8262-11	Solid Tissue Normal	10.17	8.778
TCGA-HC-8260-11	Solid Tissue Normal	10.02	8.466
TCGA-G9-6365-11	Solid Tissue Normal	9.994	9.245
TCGA-J4-A83J-11	Solid Tissue Normal	9.944	8.951
TCGA-HC-7740-11	Solid Tissue Normal	9.911	8.252
TCGA-HC-7211-11	Solid Tissue Normal	9.903	8.091
TCGA-HC-7738-11	Solid Tissue Normal	9.809	8.292
TCGA-HC-8259-11	Solid Tissue Normal	9.743	8.71
TCGA-G9-6333-11	Solid Tissue Normal	9.629	9.364
TCGA-G9-6356-11	Solid Tissue Normal	9.607	9.519
TCGA-EJ-7793-11	Solid Tissue Normal	9.455	8.599
TCGA-CH-5767-11	Solid Tissue Normal	9.406	8.324
TCGA-G9-6363-11	Solid Tissue Normal	9.327	9.021
TCGA-HC-8258-11	Solid Tissue Normal	9.287	8.455
TCGA-EJ-A8FO-11	Solid Tissue Normal	9.258	8.734
TCGA-EJ-7792-11	Solid Tissue Normal	9.256	8.62
TCGA-EJ-7785-11	Solid Tissue Normal	9.133	8.111
TCGA-EJ-7794-11	Solid Tissue Normal	9.111	8.438
TCGA-EJ-7789-11	Solid Tissue Normal	9.108	8.235
TCGA-CH-5768-11	Solid Tissue Normal	9.086	8.487
TCGA-EJ-7327-11	Solid Tissue Normal	9.084	8.234
TCGA-EJ-7328-11	Solid Tissue Normal	9.068	8.541
TCGA-EJ-7797-11	Solid Tissue Normal	9.045	8.481
TCGA-EJ-7321-11	Solid Tissue Normal	9.042	8.52
TCGA-HC-7745-11	Solid Tissue Normal	9.002	8.458
TCGA-HC-7819-11	Solid Tissue Normal	8.951	8.579
TCGA-HC-7747-11	Solid Tissue Normal	8.943	8.224
TCGA-EJ-7784-11	Solid Tissue Normal	8.919	8.279
TCGA-EJ-7125-11	Solid Tissue Normal	8.88	8.123
TCGA-G9-6348-11	Solid Tissue Normal	8.877	8.883
TCGA-CH-5761-11	Solid Tissue Normal	8.851	9.023
TCGA-G9-6499-11	Solid Tissue Normal	8.841	8.72
TCGA-EJ-7781-11	Solid Tissue Normal	8.829	8.128
TCGA-HC-7752-11	Solid Tissue Normal	8.826	9.263
TCGA-EJ-7115-11	Solid Tissue Normal	8.8	8.48
TCGA-G9-6496-11	Solid Tissue Normal	8.79	8.928
TCGA-EJ-7315-11	Solid Tissue Normal	8.776	8.812
TCGA-EJ-7786-11	Solid Tissue Normal	8.776	7.956
TCGA-EJ-7331-11	Solid Tissue Normal	8.771	8.482
TCGA-HC-7737-11	Solid Tissue Normal	8.696	8.112
TCGA-G9-6351-11	Solid Tissue Normal	8.67	8.623
TCGA-EJ-7782-11	Solid Tissue Normal	8.67	7.918
TCGA-G9-6384-11	Solid Tissue Normal	8.649	8.612
TCGA-CH-5769-11	Solid Tissue Normal	8.612	9.237
TCGA-EJ-7783-11	Solid Tissue Normal	8.582	8.605
TCGA-EJ-7317-11	Solid Tissue Normal	8.393	8.167
TCGA-EJ-7330-11	Solid Tissue Normal	8.363	8.309
TCGA-G9-6342-11	Solid Tissue Normal	8.342	8.817
TCGA-EJ-7314-11	Solid Tissue Normal	8.272	8.001
TCGA-EJ-7123-11	Solid Tissue Normal	8.26	7.816
TCGA-HC-7742-11	Solid Tissue Normal	8.235	8.821
TCGA-KK-A8ID-01	Primary Tumor	11.52	8.786
TCGA-XQ-A8TA-01	Primary Tumor	11.49	9.12
TCGA-WW-A8ZI-01	Primary Tumor	11.36	9.235
TCGA-V1-A9OT-01	Primary Tumor	11.16	9.267
TCGA-VP-A875-01	Primary Tumor	11.12	9.24
TCGA-ZG-A9KY-01	Primary Tumor	11	8.997
TCGA-HC-A9TE-01	Primary Tumor	10.99	9.933
TCGA-V1-A9ZR-01	Primary Tumor	10.99	9.348
TCGA-XJ-A9DX-01	Primary Tumor	10.97	9.439
TCGA-KK-A8IK-01	Primary Tumor	10.94	8.906
TCGA-KK-A7B3-01	Primary Tumor	10.92	9.121
TCGA-VN-A88Q-01	Primary Tumor	10.9	9.852
TCGA-VN-A88K-01	Primary Tumor	10.83	9.206
TCGA-FC-A4JI-01	Primary Tumor	10.83	8.968
TCGA-HC-8265-01	Primary Tumor	10.82	9.017
TCGA-YL-A8SP-01	Primary Tumor	10.82	8.797
TCGA-YL-A8SJ-01	Primary Tumor	10.78	9.293
TCGA-KK-A7AP-01	Primary Tumor	10.77	9.348
TCGA-V1-A8MG-01	Primary Tumor	10.77	9.083
TCGA-YL-A8SL-01	Primary Tumor	10.76	9.448
TCGA-YL-A8SR-01	Primary Tumor	10.74	8.833
TCGA-KK-A7AU-01	Primary Tumor	10.72	9.58
TCGA-TP-A8TT-01	Primary Tumor	10.69	9.122
TCGA-V1-A8WV-01	Primary Tumor	10.67	10.41
TCGA-CH-5751-01	Primary Tumor	10.65	8.966
TCGA-KK-A7AZ-01	Primary Tumor	10.64	9.441
TCGA-KK-A8II-01	Primary Tumor	10.64	8.776
TCGA-KK-A7B4-01	Primary Tumor	10.62	9.773
TCGA-EJ-A46G-01	Primary Tumor	10.62	9.629
TCGA-EJ-8472-01	Primary Tumor	10.62	8.893
TCGA-J4-A83I-01	Primary Tumor	10.6	9.107
TCGA-Y6-A9XI-01	Primary Tumor	10.59	9.421
TCGA-HC-A48F-01	Primary Tumor	10.59	9.271
TCGA-HC-A4ZV-01	Primary Tumor	10.58	9.898
TCGA-YL-A8SA-01	Primary Tumor	10.58	9.571
TCGA-KC-A7FA-01	Primary Tumor	10.57	9.13
TCGA-XJ-A9DK-01	Primary Tumor	10.55	9.041
TCGA-ZG-A9L5-01	Primary Tumor	10.54	9.75
TCGA-YL-A8SO-01	Primary Tumor	10.54	9.493
TCGA-KK-A8IL-01	Primary Tumor	10.54	9.331
TCGA-KC-A7FD-01	Primary Tumor	10.54	8.493
TCGA-YL-A8HL-01	Primary Tumor	10.53	9.36
TCGA-KK-A8I9-01	Primary Tumor	10.53	9.287
TCGA-KK-A8I4-01	Primary Tumor	10.53	9.12
TCGA-V1-A9O5-01	Primary Tumor	10.52	9.382
TCGA-KK-A8I8-01	Primary Tumor	10.51	9.183
TCGA-KK-A59V-01	Primary Tumor	10.5	9.476
TCGA-KC-A7F6-01	Primary Tumor	10.5	9.174
TCGA-G9-6362-01	Primary Tumor	10.5	9.168
TCGA-X4-A8KS-01	Primary Tumor	10.49	9.238
TCGA-V1-A9O9-01	Primary Tumor	10.49	9.209
TCGA-EJ-A7NH-01	Primary Tumor	10.49	8.962
TCGA-EJ-8470-01	Primary Tumor	10.49	8.75
TCGA-HC-8260-01	Primary Tumor	10.49	8.647
TCGA-XJ-A9DI-01	Primary Tumor	10.48	9.408
TCGA-2A-A8VT-01	Primary Tumor	10.47	8.671
TCGA-2A-A8W1-01	Primary Tumor	10.47	8.505
TCGA-G9-A9S4-01	Primary Tumor	10.46	9.372
TCGA-VP-A87K-01	Primary Tumor	10.45	9.363
TCGA-CH-5753-01	Primary Tumor	10.45	8.959
TCGA-EJ-A7NM-01	Primary Tumor	10.44	9.316
TCGA-KK-A8IA-01	Primary Tumor	10.44	9.204
TCGA-VN-A88O-01	Primary Tumor	10.44	8.91
TCGA-HC-A8D0-01	Primary Tumor	10.43	9.069
TCGA-YL-A9WK-01	Primary Tumor	10.43	9.044
TCGA-HC-A76W-01	Primary Tumor	10.42	9.357
TCGA-YL-A8HK-01	Primary Tumor	10.42	8.984
TCGA-XK-AAJA-01	Primary Tumor	10.41	9.428
TCGA-YL-A9WY-01	Primary Tumor	10.41	8.952
TCGA-V1-A9OL-01	Primary Tumor	10.4	9.917
TCGA-KC-A7F5-01	Primary Tumor	10.4	9.411
TCGA-KK-A7AV-01	Primary Tumor	10.4	9.373
TCGA-VP-A87D-01	Primary Tumor	10.4	9.229
TCGA-HC-A9TH-01	Primary Tumor	10.4	9.092
TCGA-TP-A8TV-01	Primary Tumor	10.4	8.928
TCGA-XJ-A9DQ-01	Primary Tumor	10.39	9.094
TCGA-V1-A8WL-01	Primary Tumor	10.39	8.559
TCGA-HC-A632-01	Primary Tumor	10.38	10.11
TCGA-J4-8198-01	Primary Tumor	10.38	8.804
TCGA-VN-A88M-01	Primary Tumor	10.37	9.035
TCGA-EJ-A65E-01	Primary Tumor	10.37	8.652
TCGA-YL-A8S8-01	Primary Tumor	10.37	8.528
TCGA-V1-A8MU-01	Primary Tumor	10.36	9.031
TCGA-YL-A9WL-01	Primary Tumor	10.36	8.957
TCGA-SU-A7E7-01	Primary Tumor	10.36	8.774
TCGA-J4-A6G1-01	Primary Tumor	10.35	9.394
TCGA-V1-A9ZI-01	Primary Tumor	10.34	9.627
TCGA-YL-A8SC-01	Primary Tumor	10.34	9.463
TCGA-KK-A8IH-01	Primary Tumor	10.34	9.425
TCGA-V1-A8MM-01	Primary Tumor	10.33	8.939
TCGA-HI-7171-01	Primary Tumor	10.32	9.751
TCGA-YL-A9WX-01	Primary Tumor	10.32	9.045
TCGA-M7-A724-01	Primary Tumor	10.31	9.529
TCGA-YL-A8SQ-01	Primary Tumor	10.3	9.24
TCGA-2A-A8VX-01	Primary Tumor	10.3	9.21
TCGA-KK-A6DY-01	Primary Tumor	10.3	9.187
TCGA-KK-A6E1-01	Primary Tumor	10.3	8.379
TCGA-YL-A8SH-01	Primary Tumor	10.29	9.181
TCGA-MG-AAMC-01	Primary Tumor	10.29	9.157
TCGA-M7-A725-01	Primary Tumor	10.29	8.72
TCGA-VN-A88L-01	Primary Tumor	10.28	9.289
TCGA-FC-7961-01	Primary Tumor	10.28	8.457
TCGA-KK-A7B1-01	Primary Tumor	10.27	9.374
TCGA-XK-AAJP-01	Primary Tumor	10.27	9.049
TCGA-XK-AAJ3-01	Primary Tumor	10.26	8.894
TCGA-FC-A8O0-01	Primary Tumor	10.26	8.695
TCGA-XJ-A83F-01	Primary Tumor	10.25	9.638
TCGA-YL-A8SK-01	Primary Tumor	10.25	8.891
TCGA-J9-A8CM-01	Primary Tumor	10.24	8.748
TCGA-KK-A5A1-01	Primary Tumor	10.23	8.851
TCGA-XQ-A8TB-01	Primary Tumor	10.23	8.553
TCGA-HC-A8CY-01	Primary Tumor	10.22	9.431
TCGA-J9-A8CK-01	Primary Tumor	10.22	9.1
TCGA-J4-A83K-01	Primary Tumor	10.22	8.888
TCGA-ZG-A9M4-01	Primary Tumor	10.21	10
TCGA-X4-A8KQ-01	Primary Tumor	10.21	9.371
TCGA-V1-A8WS-01	Primary Tumor	10.2	8.834
TCGA-XK-AAJU-01	Primary Tumor	10.19	9.449
TCGA-G9-A9S7-01	Primary Tumor	10.17	9.472
TCGA-J4-AATZ-01	Primary Tumor	10.17	9.292
TCGA-VP-A878-01	Primary Tumor	10.17	9.212
TCGA-J4-A83J-01	Primary Tumor	10.16	8.893
TCGA-2A-A8VO-01	Primary Tumor	10.16	8.825
TCGA-EJ-A65F-01	Primary Tumor	10.16	8.769
TCGA-V1-A9OY-01	Primary Tumor	10.15	9.135
TCGA-ZG-A9L0-01	Primary Tumor	10.14	9.131
TCGA-YL-A8SF-01	Primary Tumor	10.14	8.867
TCGA-M7-A71Z-01	Primary Tumor	10.13	9.624
TCGA-VN-A88P-01	Primary Tumor	10.13	9.003
TCGA-KK-A8IM-01	Primary Tumor	10.13	8.97
TCGA-2A-A8VL-01	Primary Tumor	10.13	8.534
TCGA-KK-A7AQ-01	Primary Tumor	10.12	9.561
TCGA-M7-A71Y-01	Primary Tumor	10.12	9.186
TCGA-J4-A6G3-01	Primary Tumor	10.12	8.87
TCGA-HC-A76X-01	Primary Tumor	10.12	8.754
TCGA-EJ-A7NK-01	Primary Tumor	10.11	8.811
TCGA-G9-6363-01	Primary Tumor	10.11	8.401
TCGA-J9-A8CL-01	Primary Tumor	10.1	9.317
TCGA-HC-8266-01	Primary Tumor	10.09	9.679
TCGA-YL-A9WH-01	Primary Tumor	10.08	9.65
TCGA-M7-A720-01	Primary Tumor	10.08	8.928
TCGA-Y6-A8TL-01	Primary Tumor	10.08	8.856
TCGA-V1-A9OA-01	Primary Tumor	10.08	8.829
TCGA-HC-A631-01	Primary Tumor	10.08	8.813
TCGA-J4-A67T-01	Primary Tumor	10.07	8.741
TCGA-HC-A6HY-01	Primary Tumor	10.06	9.666
TCGA-VN-A88N-01	Primary Tumor	10.06	9.025
TCGA-EJ-A7NF-01	Primary Tumor	10.06	8.764
TCGA-J4-A83M-01	Primary Tumor	10.05	9.011
TCGA-KC-A4BV-01	Primary Tumor	10.05	8.581
TCGA-V1-A8WN-01	Primary Tumor	10.05	8.317
TCGA-CH-5754-01	Primary Tumor	10.04	9.177
TCGA-V1-A9OX-01	Primary Tumor	10.04	9.106
TCGA-VP-A879-01	Primary Tumor	10.04	8.846
TCGA-J4-A6M7-01	Primary Tumor	10.04	8.808
TCGA-ZG-A9LU-01	Primary Tumor	10.03	9.417
TCGA-VN-A88I-01	Primary Tumor	10.02	9.312
TCGA-EJ-7328-01	Primary Tumor	10.02	9.29
TCGA-KC-A4BL-01	Primary Tumor	10.02	9.171
TCGA-YL-A8SB-01	Primary Tumor	10.02	8.855
TCGA-EJ-A46D-01	Primary Tumor	10.01	9.095
TCGA-YL-A8S9-01	Primary Tumor	10.01	8.941
TCGA-EJ-A65G-01	Primary Tumor	10.01	8.494
TCGA-KK-A59X-01	Primary Tumor	10	9.14
TCGA-EJ-7789-01	Primary Tumor	9.995	9.417
TCGA-VP-A876-01	Primary Tumor	9.993	9.154
TCGA-EJ-A7NG-01	Primary Tumor	9.991	8.856
TCGA-EJ-A7NN-01	Primary Tumor	9.989	8.964
TCGA-HC-7078-01	Primary Tumor	9.975	9.085
TCGA-V1-A9OF-01	Primary Tumor	9.975	8.495
TCGA-J4-8200-01	Primary Tumor	9.974	8.064
TCGA-ZG-A9LN-01	Primary Tumor	9.969	9.109
TCGA-KC-A7F3-01	Primary Tumor	9.967	8.557
TCGA-KK-A8I6-01	Primary Tumor	9.96	8.925
TCGA-KC-A4BR-01	Primary Tumor	9.96	8.582
TCGA-XK-AAJR-01	Primary Tumor	9.955	8.992
TCGA-FC-7708-01	Primary Tumor	9.945	8.442
TCGA-EJ-A46E-01	Primary Tumor	9.937	8.885
TCGA-ZG-A9LY-01	Primary Tumor	9.936	9.017
TCGA-J4-A83L-01	Primary Tumor	9.936	8.199
TCGA-VN-A88R-01	Primary Tumor	9.934	8.832
TCGA-VP-A87B-01	Primary Tumor	9.931	8.757
TCGA-EJ-A46F-01	Primary Tumor	9.929	9.492
TCGA-V1-A8MK-01	Primary Tumor	9.919	8.628
TCGA-EJ-8474-01	Primary Tumor	9.917	8.639
TCGA-XK-AAJT-01	Primary Tumor	9.903	9.26
TCGA-CH-5761-01	Primary Tumor	9.899	8.935
TCGA-YJ-A8SW-01	Primary Tumor	9.895	8.208
TCGA-KK-A6E0-01	Primary Tumor	9.893	8.462
TCGA-KC-A4BN-01	Primary Tumor	9.887	8.306
TCGA-CH-5752-01	Primary Tumor	9.887	8.223
TCGA-HC-8264-01	Primary Tumor	9.881	8.265
TCGA-CH-5765-01	Primary Tumor	9.88	8.389
TCGA-VP-A872-01	Primary Tumor	9.876	9.61
TCGA-ZG-A9LZ-01	Primary Tumor	9.874	9.295
TCGA-EJ-7788-01	Primary Tumor	9.872	8.394
TCGA-KK-A8I5-01	Primary Tumor	9.871	8.755
TCGA-V1-A9O7-01	Primary Tumor	9.869	8.877
TCGA-YL-A8HM-01	Primary Tumor	9.859	9.137
TCGA-YL-A8HJ-01	Primary Tumor	9.859	8.783
TCGA-CH-5750-01	Primary Tumor	9.856	8.474
TCGA-EJ-A46B-01	Primary Tumor	9.852	8.584
TCGA-KC-A7FE-01	Primary Tumor	9.847	8.882
TCGA-EJ-A7NJ-01	Primary Tumor	9.842	8.516
TCGA-2A-A8VV-01	Primary Tumor	9.839	8.809
TCGA-J4-AATV-01	Primary Tumor	9.826	9.273
TCGA-EJ-5526-01	Primary Tumor	9.826	8.413
TCGA-XA-A8JR-01	Primary Tumor	9.822	8.834
TCGA-HC-8257-01	Primary Tumor	9.819	8.908
TCGA-CH-5746-01	Primary Tumor	9.817	8.447
TCGA-HC-7752-01	Primary Tumor	9.811	9.795
TCGA-V1-A8MF-01	Primary Tumor	9.808	8.922
TCGA-XK-AAIR-01	Primary Tumor	9.807	8.649
TCGA-J9-A52D-01	Primary Tumor	9.8	8.534
TCGA-KK-A8IF-01	Primary Tumor	9.796	9.253
TCGA-XJ-A83G-01	Primary Tumor	9.788	9.162
TCGA-2A-AAYO-01	Primary Tumor	9.785	8.909
TCGA-HC-8259-01	Primary Tumor	9.784	8.659
TCGA-HC-7821-01	Primary Tumor	9.782	9.583
TCGA-YL-A9WJ-01	Primary Tumor	9.78	8.749
TCGA-YL-A8HO-01	Primary Tumor	9.774	9.157
TCGA-J9-A8CN-01	Primary Tumor	9.774	8.726
TCGA-ZG-A9L6-01	Primary Tumor	9.769	8.755
TCGA-EJ-A46I-01	Primary Tumor	9.76	8.889
TCGA-EJ-8468-01	Primary Tumor	9.76	8.229
TCGA-QU-A6IN-01	Primary Tumor	9.754	10.03
TCGA-V1-A8ML-01	Primary Tumor	9.751	8.901
TCGA-4L-AA1F-01	Primary Tumor	9.751	8.453
TCGA-EJ-A8FU-01	Primary Tumor	9.75	8.582
TCGA-G9-A9S0-01	Primary Tumor	9.749	9.172
TCGA-KK-A8IB-01	Primary Tumor	9.749	9.107
TCGA-HC-7745-01	Primary Tumor	9.747	8.945
TCGA-J4-A83N-01	Primary Tumor	9.747	8.735
TCGA-CH-5766-01	Primary Tumor	9.744	8.32
TCGA-KK-A8IC-01	Primary Tumor	9.74	9
TCGA-ZG-A9LS-01	Primary Tumor	9.73	9.161
TCGA-HC-8256-01	Primary Tumor	9.73	8.627
TCGA-CH-5790-01	Primary Tumor	9.725	8.74
TCGA-XK-AAIW-01	Primary Tumor	9.719	9.582
TCGA-HC-8261-01	Primary Tumor	9.715	8.869
TCGA-KK-A59Z-01	Primary Tumor	9.714	9.381
TCGA-EJ-A46H-01	Primary Tumor	9.711	8.408
TCGA-YL-A8SI-01	Primary Tumor	9.707	8.605
TCGA-EJ-A8FS-01	Primary Tumor	9.703	8.383
TCGA-HI-7168-01	Primary Tumor	9.702	9.034
TCGA-YL-A9WI-01	Primary Tumor	9.696	8.706
TCGA-KK-A7B2-01	Primary Tumor	9.695	9.343
TCGA-J9-A52C-01	Primary Tumor	9.693	8.902
TCGA-EJ-A65D-01	Primary Tumor	9.692	9.986
TCGA-EJ-A8FO-01	Primary Tumor	9.69	8.871
TCGA-HC-A8D1-01	Primary Tumor	9.686	8.481
TCGA-ZG-A8QW-01	Primary Tumor	9.683	9.33
TCGA-J9-A52B-01	Primary Tumor	9.677	9.489
TCGA-ZG-A8QZ-01	Primary Tumor	9.677	8.856
TCGA-QU-A6IP-01	Primary Tumor	9.676	8.997
TCGA-HC-7819-01	Primary Tumor	9.676	8.446
TCGA-ZG-A9L9-01	Primary Tumor	9.675	9.439
TCGA-J9-A52E-01	Primary Tumor	9.671	8.724
TCGA-CH-5748-01	Primary Tumor	9.671	8.326
TCGA-HC-7230-01	Primary Tumor	9.67	9.116
TCGA-EJ-7312-01	Primary Tumor	9.67	8.861
TCGA-EJ-A8FP-01	Primary Tumor	9.666	8.619
TCGA-EJ-5519-01	Primary Tumor	9.663	8.837
TCGA-ZG-A9LB-01	Primary Tumor	9.662	9.259
TCGA-G9-7521-01	Primary Tumor	9.658	8.765
TCGA-EJ-8469-01	Primary Tumor	9.652	8.507
TCGA-V1-A9Z9-01	Primary Tumor	9.644	8.837
TCGA-M7-A721-01	Primary Tumor	9.642	8.697
TCGA-V1-A9ZG-01	Primary Tumor	9.635	8.879
TCGA-EJ-7784-01	Primary Tumor	9.634	8.752
TCGA-M7-A723-01	Primary Tumor	9.633	9.023
TCGA-V1-A9Z7-01	Primary Tumor	9.628	8.892
TCGA-V1-A8X3-01	Primary Tumor	9.627	8.557
TCGA-KK-A7AY-01	Primary Tumor	9.611	9.332
TCGA-G9-6498-01	Primary Tumor	9.608	9.658
TCGA-TK-A8OK-01	Primary Tumor	9.608	8.446
TCGA-KK-A8IG-01	Primary Tumor	9.601	8.688
TCGA-EJ-5522-01	Primary Tumor	9.601	8.133
TCGA-XJ-A83H-01	Primary Tumor	9.6	8.788
TCGA-V1-A8MJ-01	Primary Tumor	9.596	9.007
TCGA-EJ-7783-01	Primary Tumor	9.596	8.5
TCGA-ZG-A9N3-01	Primary Tumor	9.595	9.812
TCGA-HC-8216-01	Primary Tumor	9.583	8.418
TCGA-FC-A6HD-01	Primary Tumor	9.582	9.977
TCGA-VP-A87C-01	Primary Tumor	9.582	8.989
TCGA-HC-7079-01	Primary Tumor	9.57	9.444
TCGA-HC-7738-01	Primary Tumor	9.563	8.56
TCGA-V1-A8WW-01	Primary Tumor	9.562	9.203
TCGA-EJ-5507-01	Primary Tumor	9.562	8.619
TCGA-KK-A6E2-01	Primary Tumor	9.56	8.967
TCGA-V1-A9ZK-01	Primary Tumor	9.557	8.646
TCGA-VP-A87H-01	Primary Tumor	9.554	9.465
TCGA-CH-5788-01	Primary Tumor	9.546	8.413
TCGA-EJ-A6RA-01	Primary Tumor	9.535	9.321
TCGA-ZG-A8QY-01	Primary Tumor	9.533	8.639
TCGA-HC-8262-01	Primary Tumor	9.531	8.706
TCGA-CH-5744-01	Primary Tumor	9.528	8.666
TCGA-XK-AAIV-01	Primary Tumor	9.526	9.164
TCGA-EJ-5511-01	Primary Tumor	9.517	8.743
TCGA-G9-6378-01	Primary Tumor	9.514	8.763
TCGA-G9-6354-01	Primary Tumor	9.512	9.03
TCGA-ZG-A9LM-01	Primary Tumor	9.507	9.124
TCGA-EJ-A65M-01	Primary Tumor	9.504	8.996
TCGA-CH-5762-01	Primary Tumor	9.496	8.598
TCGA-KK-A6E7-01	Primary Tumor	9.493	9.345
TCGA-EJ-A8FN-01	Primary Tumor	9.49	8.776
TCGA-J9-A8CP-01	Primary Tumor	9.483	8.835
TCGA-J4-A67N-01	Primary Tumor	9.482	9.521
TCGA-VP-AA1N-01	Primary Tumor	9.479	9.201
TCGA-G9-6338-01	Primary Tumor	9.474	8.84
TCGA-HC-8213-01	Primary Tumor	9.472	8.387
TCGA-EJ-5530-01	Primary Tumor	9.471	8.543
TCGA-EJ-5506-01	Primary Tumor	9.47	8.353
TCGA-H9-A6BX-01	Primary Tumor	9.463	9.059
TCGA-2A-AAYU-01	Primary Tumor	9.458	8.571
TCGA-CH-5740-01	Primary Tumor	9.457	8.629
TCGA-CH-5772-01	Primary Tumor	9.456	8.113
TCGA-CH-5743-01	Primary Tumor	9.455	8.792
TCGA-J4-A67S-01	Primary Tumor	9.446	9.652
TCGA-J4-AAU2-01	Primary Tumor	9.446	8.87
TCGA-HC-7211-01	Primary Tumor	9.438	8.21
TCGA-EJ-5514-01	Primary Tumor	9.438	8.123
TCGA-HC-7817-01	Primary Tumor	9.434	8.968
TCGA-EJ-7218-01	Primary Tumor	9.428	9.007
TCGA-HC-7080-01	Primary Tumor	9.427	9.031
TCGA-KK-A59Y-01	Primary Tumor	9.422	9.476
TCGA-FC-A66V-01	Primary Tumor	9.418	9.683
TCGA-HC-A6HX-01	Primary Tumor	9.41	10.01
TCGA-2A-A8W3-01	Primary Tumor	9.41	8.617
TCGA-HC-A6AQ-01	Primary Tumor	9.406	9.603
TCGA-G9-6339-01	Primary Tumor	9.401	9.293
TCGA-ZG-A9ND-01	Primary Tumor	9.388	8.538
TCGA-EJ-7797-01	Primary Tumor	9.384	8.678
TCGA-EJ-7325-01	Primary Tumor	9.374	9.934
TCGA-EJ-5524-01	Primary Tumor	9.364	7.936
TCGA-CH-5791-01	Primary Tumor	9.363	9.193
TCGA-HC-7820-01	Primary Tumor	9.362	8.4
TCGA-HC-A6AL-01	Primary Tumor	9.36	9.636
TCGA-EJ-7318-01	Primary Tumor	9.36	9.388
TCGA-2A-AAYF-01	Primary Tumor	9.359	8.536
TCGA-G9-7509-01	Primary Tumor	9.359	8.471
TCGA-QU-A6IL-01	Primary Tumor	9.356	9.86
TCGA-HC-7212-01	Primary Tumor	9.338	8.423
TCGA-G9-6361-01	Primary Tumor	9.333	8.988
TCGA-KK-A8I7-01	Primary Tumor	9.328	9.049
TCGA-CH-5741-01	Primary Tumor	9.326	8.658
TCGA-V1-A9OQ-01	Primary Tumor	9.324	8.891
TCGA-HC-7736-01	Primary Tumor	9.323	8.582
TCGA-G9-6342-01	Primary Tumor	9.317	9.141
TCGA-HC-8258-01	Primary Tumor	9.311	8.762
TCGA-HC-A6AO-01	Primary Tumor	9.307	9.778
TCGA-H9-A6BY-01	Primary Tumor	9.307	9.766
TCGA-G9-6333-01	Primary Tumor	9.307	8.813
TCGA-ZG-A8QX-01	Primary Tumor	9.305	8.849
TCGA-FC-A5OB-01	Primary Tumor	9.285	8.231
TCGA-QU-A6IO-01	Primary Tumor	9.283	9.998
TCGA-KK-A8IJ-01	Primary Tumor	9.273	8.631
TCGA-G9-6379-01	Primary Tumor	9.267	10.01
TCGA-EJ-AB20-01	Primary Tumor	9.266	9.15
TCGA-H9-7775-01	Primary Tumor	9.266	8.556
TCGA-XK-AAK1-01	Primary Tumor	9.264	8.814
TCGA-ZG-A9NI-01	Primary Tumor	9.255	9.568
TCGA-J4-A67K-01	Primary Tumor	9.254	9.515
TCGA-KK-A6E5-01	Primary Tumor	9.246	8.908
TCGA-EJ-5502-01	Primary Tumor	9.242	8.596
TCGA-KK-A6E8-01	Primary Tumor	9.24	8.759
TCGA-V1-A9Z8-01	Primary Tumor	9.236	9.36
TCGA-QU-A6IM-01	Primary Tumor	9.224	10.16
TCGA-EJ-5508-01	Primary Tumor	9.22	8.064
TCGA-EJ-5518-01	Primary Tumor	9.213	8.798
TCGA-EJ-7782-01	Primary Tumor	9.211	8.748
TCGA-EJ-7327-01	Primary Tumor	9.208	8.557
TCGA-CH-5745-01	Primary Tumor	9.207	8.475
TCGA-EJ-7331-01	Primary Tumor	9.204	8.181
TCGA-J4-A67L-01	Primary Tumor	9.2	9.376
TCGA-EJ-A6RC-01	Primary Tumor	9.195	8.936
TCGA-HC-7749-01	Primary Tumor	9.194	8.607
TCGA-CH-5768-01	Primary Tumor	9.18	8.47
TCGA-EJ-7792-01	Primary Tumor	9.168	8.378
TCGA-CH-5767-01	Primary Tumor	9.166	7.952
TCGA-HC-7213-01	Primary Tumor	9.159	9.238
TCGA-HC-7818-01	Primary Tumor	9.148	8.536
TCGA-ZG-A9MC-01	Primary Tumor	9.144	9.556
TCGA-CH-5763-01	Primary Tumor	9.131	7.899
TCGA-M7-A722-01	Primary Tumor	9.12	9.552
TCGA-V1-A9OH-01	Primary Tumor	9.114	8.918
TCGA-CH-5764-01	Primary Tumor	9.102	8.343
TCGA-G9-6329-01	Primary Tumor	9.1	9.393
TCGA-G9-6332-01	Primary Tumor	9.086	8.995
TCGA-J4-A67M-01	Primary Tumor	9.069	9.791
TCGA-HC-A6AS-01	Primary Tumor	9.059	9.332
TCGA-ZG-A9L4-01	Primary Tumor	9.058	8.871
TCGA-EJ-7321-01	Primary Tumor	9.058	8.651
TCGA-HC-7231-01	Primary Tumor	9.052	8.723
TCGA-VP-A87J-01	Primary Tumor	9.051	8.368
TCGA-HC-7081-01	Primary Tumor	9.04	8.492
TCGA-J4-A67R-01	Primary Tumor	9.036	9.711
TCGA-CH-5738-01	Primary Tumor	9.03	8.318
TCGA-EJ-5497-01	Primary Tumor	9.03	8.054
TCGA-J4-A67Q-01	Primary Tumor	9.016	9.819
TCGA-CH-5739-01	Primary Tumor	9.002	8.433
TCGA-KK-A6E6-01	Primary Tumor	9.001	8.818
TCGA-HC-7075-01	Primary Tumor	8.989	8.642
TCGA-EJ-AB27-01	Primary Tumor	8.985	8.8
TCGA-EJ-5542-01	Primary Tumor	8.978	7.815
TCGA-KK-A7B0-01	Primary Tumor	8.977	9.99
TCGA-EJ-A65J-01	Primary Tumor	8.977	8.981
TCGA-EJ-5527-01	Primary Tumor	8.975	7.994
TCGA-EJ-5495-01	Primary Tumor	8.972	8.61
TCGA-EJ-5525-01	Primary Tumor	8.971	8.608
TCGA-EJ-7785-01	Primary Tumor	8.97	8.274
TCGA-G9-6499-01	Primary Tumor	8.954	8.882
TCGA-EJ-A65B-01	Primary Tumor	8.944	9.026
TCGA-HC-7232-01	Primary Tumor	8.944	8.468
TCGA-J4-A67O-01	Primary Tumor	8.943	9.781
TCGA-EJ-7791-01	Primary Tumor	8.94	8.712
TCGA-G9-6366-01	Primary Tumor	8.933	8.322
TCGA-G9-6496-01	Primary Tumor	8.912	9.329
TCGA-G9-6371-01	Primary Tumor	8.91	8.501
TCGA-CH-5789-01	Primary Tumor	8.903	8.024
TCGA-HC-7742-01	Primary Tumor	8.898	9.054
TCGA-EJ-5494-01	Primary Tumor	8.896	8.711
TCGA-G9-6373-01	Primary Tumor	8.895	10.03
TCGA-VN-A943-01	Primary Tumor	8.895	8.45
TCGA-EJ-7330-01	Primary Tumor	8.883	8.028
TCGA-HC-A6AP-01	Primary Tumor	8.847	9.57
TCGA-EJ-7786-01	Primary Tumor	8.839	8.134
TCGA-ZG-A9L2-01	Primary Tumor	8.82	8.932
TCGA-HC-A6AN-01	Primary Tumor	8.812	9.644
TCGA-VP-A87E-01	Primary Tumor	8.811	8.62
TCGA-EJ-7781-01	Primary Tumor	8.809	8.132
TCGA-KK-A7AW-01	Primary Tumor	8.802	9.757
TCGA-HC-7737-01	Primary Tumor	8.801	8.519
TCGA-HC-7750-01	Primary Tumor	8.794	8.62
TCGA-CH-5769-01	Primary Tumor	8.784	8.902
TCGA-HC-7210-01	Primary Tumor	8.782	7.815
TCGA-G9-6384-01	Primary Tumor	8.779	8.55
TCGA-EJ-5532-01	Primary Tumor	8.775	8.275
TCGA-CH-5794-01	Primary Tumor	8.76	8.842
TCGA-G9-6356-01	Primary Tumor	8.734	8.929
TCGA-G9-6367-01	Primary Tumor	8.729	8.676
TCGA-HC-7748-01	Primary Tumor	8.723	8.218
TCGA-CH-5792-01	Primary Tumor	8.71	9.182
TCGA-EJ-7794-01	Primary Tumor	8.707	8.112
TCGA-EJ-5516-01	Primary Tumor	8.706	7.794
TCGA-EJ-5515-01	Primary Tumor	8.703	7.665
TCGA-G9-7522-01	Primary Tumor	8.697	8.583
TCGA-EJ-5504-01	Primary Tumor	8.69	8.128
TCGA-G9-6385-01	Primary Tumor	8.675	8.883
TCGA-G9-7523-01	Primary Tumor	8.674	8.483
TCGA-EJ-5503-01	Primary Tumor	8.673	8.804
TCGA-G9-6365-01	Primary Tumor	8.669	8.712
TCGA-EJ-5512-01	Primary Tumor	8.668	8.131
TCGA-EJ-5501-01	Primary Tumor	8.663	8.696
TCGA-G9-6351-01	Primary Tumor	8.647	8.617
TCGA-EJ-5505-01	Primary Tumor	8.642	7.982
TCGA-G9-6377-01	Primary Tumor	8.634	8.764
TCGA-EJ-5496-01	Primary Tumor	8.63	8.35
TCGA-G9-6370-01	Primary Tumor	8.623	8.736
TCGA-HC-7077-01	Primary Tumor	8.622	8.797
TCGA-CH-5771-01	Primary Tumor	8.589	8.96
TCGA-KK-A6E4-01	Primary Tumor	8.576	9.622
TCGA-HI-7169-01	Primary Tumor	8.575	9.326
TCGA-EJ-7115-01	Primary Tumor	8.575	8.856
TCGA-G9-7510-01	Primary Tumor	8.567	8.821
TCGA-ZG-A9L1-01	Primary Tumor	8.564	8.925
TCGA-G9-7519-01	Primary Tumor	8.563	8.651
TCGA-G9-6348-01	Primary Tumor	8.562	8.558
TCGA-KK-A6E3-01	Primary Tumor	8.557	9.49
TCGA-EJ-5517-01	Primary Tumor	8.533	7.998
TCGA-HC-7233-01	Primary Tumor	8.53	8.536
TCGA-G9-6364-01	Primary Tumor	8.5	7.86
TCGA-CH-5737-01	Primary Tumor	8.497	8.374
TCGA-EJ-7123-01	Primary Tumor	8.487	8.376
TCGA-G9-6494-01	Primary Tumor	8.484	8.5
TCGA-HC-7209-01	Primary Tumor	8.465	8.813
TCGA-EJ-7793-01	Primary Tumor	8.456	8.53
TCGA-HI-7170-01	Primary Tumor	8.405	8.851
TCGA-HC-7744-01	Primary Tumor	8.393	8.858
TCGA-EJ-7125-01	Primary Tumor	8.372	8.254
TCGA-EJ-5531-01	Primary Tumor	8.367	8.755
TCGA-G9-6336-01	Primary Tumor	8.304	9.069
TCGA-HC-7747-01	Primary Tumor	8.275	8.76
TCGA-EJ-7317-01	Primary Tumor	8.274	8.539
TCGA-EJ-5498-01	Primary Tumor	8.247	8.045
TCGA-EJ-7315-01	Primary Tumor	8.245	9.025
TCGA-HC-7740-01	Primary Tumor	8.243	8.377
TCGA-EJ-7314-01	Primary Tumor	8.238	8.419
TCGA-G9-7525-01	Primary Tumor	8.221	9.3
TCGA-G9-6343-01	Primary Tumor	8.218	8.793
TCGA-G9-6347-01	Primary Tumor	8.195	9.998
TCGA-G9-6369-01	Primary Tumor	8.192	8.971
TCGA-G9-6353-01	Primary Tumor	8.183	8.488
TCGA-EJ-5499-01	Primary Tumor	8.155	8.738
TCGA-EJ-5510-01	Primary Tumor	8.11	8.616
TCGA-EJ-5521-01	Primary Tumor	7.926	9.38
TCGA-EJ-5509-01	Primary Tumor	7.896	8.525
