# Supplementary material for: Implications of the KHDC4-TRAF2 axis in the context of prostate cancer prognosis
Source: Aging (Albany NY). 2025 Jun 23;17(6):1544–70. doi: 10.18632/aging.206273 (PMC12245195; doi:10.18632/aging.206273)
Supplement: Supplementary Table 3 [file aging-17-206273-s004.xlsx]

## Sheet: Supplementary Table 3
Supplementary Table 3. Members of the KHDC family in TCGA-PRAD transcriptome profiles.
		Symbol	Symbol	Symbol	Symbol
samples	sample_type	KHDC1	KHDC2	KHDC3	KHDC4
TCGA-V1-A9O5-06	Metastatic	6.057	0.4858	0	10.5
TCGA-HC-7752-11	Solid Tissue Normal	6.78	1.179	0	8.826
TCGA-EJ-7125-11	Solid Tissue Normal	6.599	2.93	1.979	8.88
TCGA-EJ-7785-11	Solid Tissue Normal	6.41	2.048	1.93	9.133
TCGA-EJ-7328-11	Solid Tissue Normal	6.356	0.4812	0	9.068
TCGA-EJ-7797-11	Solid Tissue Normal	6.354	0.9636	0.6676	9.045
TCGA-EJ-7783-11	Solid Tissue Normal	6.336	1.296	0	8.582
TCGA-HC-8260-11	Solid Tissue Normal	6.249	2.185	1.75	10.02
TCGA-G9-6342-11	Solid Tissue Normal	6.153	1.361	0	8.342
TCGA-G9-6348-11	Solid Tissue Normal	6.11	1.114	0	8.877
TCGA-EJ-7331-11	Solid Tissue Normal	6.06	0.4457	0	8.771
TCGA-G9-6384-11	Solid Tissue Normal	6.037	1.622	1.694	8.649
TCGA-EJ-7330-11	Solid Tissue Normal	6.031	2.057	0	8.363
TCGA-G9-6496-11	Solid Tissue Normal	6.03	1.671	0.5052	8.79
TCGA-EJ-7115-11	Solid Tissue Normal	5.962	0.825	0	8.8
TCGA-EJ-7123-11	Solid Tissue Normal	5.877	2.092	1.629	8.26
TCGA-HC-7819-11	Solid Tissue Normal	5.844	2.913	0	8.951
TCGA-G9-6351-11	Solid Tissue Normal	5.841	2.49	0.4711	8.67
TCGA-J4-A83J-11	Solid Tissue Normal	5.828	1.677	0	9.944
TCGA-EJ-7792-11	Solid Tissue Normal	5.79	0	0	9.256
TCGA-EJ-7317-11	Solid Tissue Normal	5.781	2.158	0	8.393
TCGA-EJ-7782-11	Solid Tissue Normal	5.726	2.096	0	8.67
TCGA-G9-6333-11	Solid Tissue Normal	5.687	0	0	9.629
TCGA-EJ-7781-11	Solid Tissue Normal	5.656	1.867	0	8.829
TCGA-EJ-7793-11	Solid Tissue Normal	5.643	2.559	0	9.455
TCGA-EJ-7789-11	Solid Tissue Normal	5.643	0	0.7306	9.108
TCGA-G9-6356-11	Solid Tissue Normal	5.564	2.066	0	9.607
TCGA-CH-5768-11	Solid Tissue Normal	5.554	2.669	0	9.086
TCGA-HC-8259-11	Solid Tissue Normal	5.548	2.054	0.7525	9.743
TCGA-G9-6365-11	Solid Tissue Normal	5.532	1.515	0.4407	9.994
TCGA-EJ-7784-11	Solid Tissue Normal	5.436	1.442	0	8.919
TCGA-EJ-7321-11	Solid Tissue Normal	5.397	2.159	0.8565	9.042
TCGA-EJ-7794-11	Solid Tissue Normal	5.385	0.4054	0	9.111
TCGA-G9-6363-11	Solid Tissue Normal	5.346	4.868	0	9.327
TCGA-EJ-7315-11	Solid Tissue Normal	5.322	1.316	0.4196	8.776
TCGA-EJ-A8FO-11	Solid Tissue Normal	5.306	2.195	0	9.258
TCGA-EJ-7786-11	Solid Tissue Normal	5.281	0.4335	0	8.776
TCGA-G9-6362-11	Solid Tissue Normal	5.233	0	0	10.88
TCGA-HC-7740-11	Solid Tissue Normal	5.167	1.576	0	9.911
TCGA-EJ-7314-11	Solid Tissue Normal	5.09	0.913	0.5276	8.272
TCGA-EJ-7327-11	Solid Tissue Normal	5.081	4.037	0	9.084
TCGA-HC-7745-11	Solid Tissue Normal	5.033	0.7048	0	9.002
TCGA-CH-5761-11	Solid Tissue Normal	4.994	2.574	0	8.851
TCGA-CH-5767-11	Solid Tissue Normal	4.91	1.686	0	9.406
TCGA-HC-8262-11	Solid Tissue Normal	4.818	0	0	10.17
TCGA-HC-7742-11	Solid Tissue Normal	4.796	2.013	0	8.235
TCGA-CH-5769-11	Solid Tissue Normal	4.748	1.102	0	8.612
TCGA-HC-8258-11	Solid Tissue Normal	4.741	0	0	9.287
TCGA-HC-7747-11	Solid Tissue Normal	4.564	0.4921	0	8.943
TCGA-G9-6499-11	Solid Tissue Normal	4.551	0.4222	0	8.841
TCGA-HC-7738-11	Solid Tissue Normal	4.426	0	0	9.809
TCGA-HC-7211-11	Solid Tissue Normal	4.367	0	0.6439	9.903
TCGA-HC-7737-11	Solid Tissue Normal	4.201	1.092	0	8.696
TCGA-XJ-A9DX-01	Primary Tumor	7.802	3.923	3.37	10.97
TCGA-EJ-A46G-01	Primary Tumor	7.556	0	0	10.62
TCGA-XK-AAJ3-01	Primary Tumor	7.554	5.179	0	10.26
TCGA-CH-5751-01	Primary Tumor	7.518	0	0	10.65
TCGA-EJ-AB20-01	Primary Tumor	7.456	1.645	0.7484	9.266
TCGA-G9-6347-01	Primary Tumor	7.352	0	1.253	8.195
TCGA-FC-A8O0-01	Primary Tumor	7.204	0	0.5659	10.26
TCGA-QU-A6IM-01	Primary Tumor	7.146	1.25	0	9.224
TCGA-KK-A7AQ-01	Primary Tumor	7.096	6.171	0	10.12
TCGA-EJ-A46F-01	Primary Tumor	7.075	0.6616	0.6616	9.929
TCGA-KK-A7AY-01	Primary Tumor	7.021	5.754	0	9.611
TCGA-V1-A9ZI-01	Primary Tumor	6.949	1.451	0.9004	10.34
TCGA-KK-A7B0-01	Primary Tumor	6.932	1.045	0	8.977
TCGA-V1-A9OF-01	Primary Tumor	6.931	0	0	9.975
TCGA-KK-A7AZ-01	Primary Tumor	6.886	0	0.4827	10.64
TCGA-KK-A7AP-01	Primary Tumor	6.881	6.442	0	10.77
TCGA-EJ-A65B-01	Primary Tumor	6.87	4.705	0	8.944
TCGA-VP-A87D-01	Primary Tumor	6.864	1.576	0	10.4
TCGA-TP-A8TV-01	Primary Tumor	6.812	0	0.6013	10.4
TCGA-G9-6366-01	Primary Tumor	6.811	0	0	8.933
TCGA-YL-A8SH-01	Primary Tumor	6.805	0.9839	0	10.29
TCGA-HC-8261-01	Primary Tumor	6.79	4.565	0	9.715
TCGA-G9-6379-01	Primary Tumor	6.786	3.599	0	9.267
TCGA-HC-A6HX-01	Primary Tumor	6.766	2.697	0	9.41
TCGA-G9-6333-01	Primary Tumor	6.722	0	0.8078	9.307
TCGA-FC-A66V-01	Primary Tumor	6.719	0.7768	0	9.418
TCGA-G9-6378-01	Primary Tumor	6.692	0.6716	0	9.514
TCGA-G9-6496-01	Primary Tumor	6.625	0	0	8.912
TCGA-XJ-A9DQ-01	Primary Tumor	6.618	4.121	0	10.39
TCGA-KK-A6E3-01	Primary Tumor	6.607	4.778	0.6549	8.557
TCGA-VN-A88K-01	Primary Tumor	6.578	4.191	0.504	10.83
TCGA-J4-A67S-01	Primary Tumor	6.569	1.391	0	9.446
TCGA-YL-A8HM-01	Primary Tumor	6.549	5.26	0	9.859
TCGA-ZG-A9LM-01	Primary Tumor	6.524	6.931	0.9485	9.507
TCGA-KK-A5A1-01	Primary Tumor	6.523	0	0	10.23
TCGA-HC-8265-01	Primary Tumor	6.522	1.276	0.5819	10.82
TCGA-V1-A9Z7-01	Primary Tumor	6.501	4.709	0	9.628
TCGA-V1-A9OT-01	Primary Tumor	6.489	0	0	11.16
TCGA-HC-A76W-01	Primary Tumor	6.472	1.052	0	10.42
TCGA-KC-A7F6-01	Primary Tumor	6.399	0	0	10.5
TCGA-J4-A83I-01	Primary Tumor	6.397	0.4432	0	10.6
TCGA-KK-A8I7-01	Primary Tumor	6.372	5.413	0.5195	9.328
TCGA-XJ-A83F-01	Primary Tumor	6.351	6.172	0	10.25
TCGA-EJ-A8FS-01	Primary Tumor	6.339	6.292	0	9.703
TCGA-ZG-A9LB-01	Primary Tumor	6.321	0	0	9.662
TCGA-EJ-A65E-01	Primary Tumor	6.317	4.285	0	10.37
TCGA-H9-A6BY-01	Primary Tumor	6.289	5.44	0	9.307
TCGA-G9-6369-01	Primary Tumor	6.279	0.5618	0	8.192
TCGA-CH-5741-01	Primary Tumor	6.277	5.071	0	9.326
TCGA-KK-A6E0-01	Primary Tumor	6.267	0	0	9.893
TCGA-M7-A724-01	Primary Tumor	6.245	5.321	0.474	10.31
TCGA-VN-A88I-01	Primary Tumor	6.245	0.6551	0	10.02
TCGA-EJ-7794-01	Primary Tumor	6.238	4.553	0	8.707
TCGA-Y6-A8TL-01	Primary Tumor	6.232	0.6813	0	10.08
TCGA-2A-A8VT-01	Primary Tumor	6.217	0.758	0.7952	10.47
TCGA-ZG-A9KY-01	Primary Tumor	6.215	0	0	11
TCGA-J9-A8CL-01	Primary Tumor	6.194	4.572	0	10.1
TCGA-XK-AAIR-01	Primary Tumor	6.175	4.907	0	9.807
TCGA-FC-A6HD-01	Primary Tumor	6.17	0	0	9.582
TCGA-J4-A67Q-01	Primary Tumor	6.156	0	0	9.016
TCGA-CH-5750-01	Primary Tumor	6.148	0	0	9.856
TCGA-ZG-A9LN-01	Primary Tumor	6.144	4.765	0	9.969
TCGA-J9-A8CN-01	Primary Tumor	6.14	5.761	0	9.774
TCGA-HC-A6AQ-01	Primary Tumor	6.14	1.602	0	9.406
TCGA-HC-A6AS-01	Primary Tumor	6.138	4.073	0	9.059
TCGA-VP-A87B-01	Primary Tumor	6.134	4.856	0	9.931
TCGA-KK-A59Y-01	Primary Tumor	6.131	4.095	0	9.422
TCGA-XQ-A8TA-01	Primary Tumor	6.092	0	0	11.49
TCGA-EJ-5494-01	Primary Tumor	6.09	1.137	0	8.896
TCGA-G9-6367-01	Primary Tumor	6.09	1.003	0.441	8.729
TCGA-EJ-A6RA-01	Primary Tumor	6.087	3.27	0.5874	9.535
TCGA-V1-A9OA-01	Primary Tumor	6.083	4.526	0	10.08
TCGA-TP-A8TT-01	Primary Tumor	6.081	3.657	0	10.69
TCGA-V1-A9OL-01	Primary Tumor	6.076	5.569	1.899	10.4
TCGA-G9-6371-01	Primary Tumor	6.068	0.4176	0	8.91
TCGA-H9-A6BX-01	Primary Tumor	6.065	1.525	0	9.463
TCGA-HC-7080-01	Primary Tumor	6.055	0.8987	0.6565	9.427
TCGA-X4-A8KS-01	Primary Tumor	6.052	3.653	0.8696	10.49
TCGA-EJ-A7NM-01	Primary Tumor	6.045	0.8111	0.474	10.44
TCGA-KK-A8IJ-01	Primary Tumor	6.035	5.153	0.5002	9.273
TCGA-EJ-7330-01	Primary Tumor	6.009	3.597	0	8.883
TCGA-EJ-5517-01	Primary Tumor	6.008	5.915	0.395	8.533
TCGA-HC-8216-01	Primary Tumor	5.997	0.6007	0	9.583
TCGA-YL-A8SI-01	Primary Tumor	5.997	0	0	9.707
TCGA-HC-A6AN-01	Primary Tumor	5.996	6.646	0	8.812
TCGA-HI-7169-01	Primary Tumor	5.992	1.867	0	8.575
TCGA-KK-A8I5-01	Primary Tumor	5.984	0	0.6199	9.871
TCGA-KK-A59Z-01	Primary Tumor	5.982	4.075	0	9.714
TCGA-J4-A67O-01	Primary Tumor	5.979	1.595	0	8.943
TCGA-VN-A88L-01	Primary Tumor	5.977	0.5889	0.5889	10.28
TCGA-J9-A52C-01	Primary Tumor	5.965	4.79	0	9.693
TCGA-G9-6343-01	Primary Tumor	5.963	0	0	8.218
TCGA-EJ-A46I-01	Primary Tumor	5.961	3.391	0	9.76
TCGA-J4-AAU2-01	Primary Tumor	5.954	5.236	0	9.446
TCGA-EJ-5505-01	Primary Tumor	5.947	4.204	0	8.642
TCGA-V1-A8MM-01	Primary Tumor	5.946	0.576	0.576	10.33
TCGA-YL-A8SO-01	Primary Tumor	5.934	0	0.6166	10.54
TCGA-HC-A6AP-01	Primary Tumor	5.933	1.769	0	8.847
TCGA-EJ-A7NH-01	Primary Tumor	5.924	4.483	0	10.49
TCGA-EJ-7115-01	Primary Tumor	5.92	0	0	8.575
TCGA-KK-A8IF-01	Primary Tumor	5.918	0	0.7208	9.796
TCGA-HC-7817-01	Primary Tumor	5.917	3.937	0	9.434
TCGA-V1-A9OX-01	Primary Tumor	5.916	4.574	0	10.04
TCGA-HC-8256-01	Primary Tumor	5.915	4.508	0.8417	9.73
TCGA-KK-A8IH-01	Primary Tumor	5.913	5.93	0	10.34
TCGA-ZG-A9L9-01	Primary Tumor	5.901	0	0	9.675
TCGA-G9-6499-01	Primary Tumor	5.897	3.077	0	8.954
TCGA-V1-A9OY-01	Primary Tumor	5.896	0.5557	0.5557	10.15
TCGA-VP-A872-01	Primary Tumor	5.893	0.9078	0	9.876
TCGA-M7-A725-01	Primary Tumor	5.871	0	0	10.29
TCGA-J4-A6G3-01	Primary Tumor	5.861	3.133	0	10.12
TCGA-HC-8266-01	Primary Tumor	5.858	0	0	10.09
TCGA-EJ-7789-01	Primary Tumor	5.852	0	0.8867	9.995
TCGA-HC-7740-01	Primary Tumor	5.848	3.59	0	8.243
TCGA-G9-6353-01	Primary Tumor	5.84	1.844	0.454	8.183
TCGA-KK-A7B1-01	Primary Tumor	5.837	0.5013	0	10.27
TCGA-EJ-A7NK-01	Primary Tumor	5.823	0.8418	0	10.11
TCGA-EJ-5522-01	Primary Tumor	5.82	0.9298	0	9.601
TCGA-HC-8259-01	Primary Tumor	5.806	0.422	0.422	9.784
TCGA-KK-A8ID-01	Primary Tumor	5.802	0	0	11.52
TCGA-VN-A88N-01	Primary Tumor	5.8	1.252	0	10.06
TCGA-ZG-A9NI-01	Primary Tumor	5.799	4.825	1.702	9.255
TCGA-KK-A8I6-01	Primary Tumor	5.794	0	0	9.96
TCGA-V1-A8MG-01	Primary Tumor	5.792	0.7378	0.7378	10.77
TCGA-V1-A8WL-01	Primary Tumor	5.791	0.679	0	10.39
TCGA-G9-A9S7-01	Primary Tumor	5.789	5.022	0	10.17
TCGA-V1-A9Z8-01	Primary Tumor	5.779	3.27	0	9.236
TCGA-HC-8258-01	Primary Tumor	5.772	3.632	0	9.311
TCGA-YL-A8SQ-01	Primary Tumor	5.768	0	0	10.3
TCGA-V1-A9ZK-01	Primary Tumor	5.765	1.734	0	9.557
TCGA-HC-7233-01	Primary Tumor	5.754	3.731	0.4356	8.53
TCGA-EJ-A46H-01	Primary Tumor	5.754	2.356	0.9652	9.711
TCGA-HC-8260-01	Primary Tumor	5.753	0.395	1.815	10.49
TCGA-EJ-A8FO-01	Primary Tumor	5.742	3.944	0	9.69
TCGA-KC-A7FE-01	Primary Tumor	5.74	0.8857	0	9.847
TCGA-EJ-A65M-01	Primary Tumor	5.735	1.968	2.424	9.504
TCGA-V1-A8MF-01	Primary Tumor	5.729	4.277	0	9.808
TCGA-EJ-8468-01	Primary Tumor	5.729	0.7645	0	9.76
TCGA-KK-A8II-01	Primary Tumor	5.701	0	0	10.64
TCGA-KC-A4BL-01	Primary Tumor	5.699	1.187	0	10.02
TCGA-KK-A7AV-01	Primary Tumor	5.693	1.037	0	10.4
TCGA-G9-6385-01	Primary Tumor	5.693	0.7721	0	8.675
TCGA-KK-A8IB-01	Primary Tumor	5.691	0	0	9.749
TCGA-G9-7519-01	Primary Tumor	5.685	0.8007	0	8.563
TCGA-EJ-5512-01	Primary Tumor	5.684	1.919	0	8.668
TCGA-EJ-AB27-01	Primary Tumor	5.68	0.4423	0	8.985
TCGA-ZG-A9L0-01	Primary Tumor	5.678	0	0	10.14
TCGA-YL-A8HO-01	Primary Tumor	5.674	0	0	9.774
TCGA-CH-5745-01	Primary Tumor	5.663	0.9868	0	9.207
TCGA-CH-5754-01	Primary Tumor	5.661	0.2843	0	10.04
TCGA-J4-A67L-01	Primary Tumor	5.657	1.623	0	9.2
TCGA-HC-7737-01	Primary Tumor	5.649	4.19	0	8.801
TCGA-VN-A88R-01	Primary Tumor	5.646	0	0	9.934
TCGA-KC-A7F3-01	Primary Tumor	5.643	4.799	0	9.967
TCGA-EJ-5515-01	Primary Tumor	5.643	3.43	0	8.703
TCGA-G9-7523-01	Primary Tumor	5.642	1.481	0	8.674
TCGA-M7-A722-01	Primary Tumor	5.635	0	0	9.12
TCGA-G9-6356-01	Primary Tumor	5.632	3.995	0	8.734
TCGA-J4-A67R-01	Primary Tumor	5.631	1.052	0	9.036
TCGA-KK-A7B2-01	Primary Tumor	5.618	1.083	0	9.695
TCGA-V1-A8WN-01	Primary Tumor	5.616	0	0.4453	10.05
TCGA-G9-A9S4-01	Primary Tumor	5.602	0.8929	0	10.46
TCGA-KC-A7F5-01	Primary Tumor	5.601	5.432	0.5301	10.4
TCGA-XK-AAJU-01	Primary Tumor	5.597	4.479	0.5846	10.19
TCGA-EJ-A7NJ-01	Primary Tumor	5.594	3.401	1.383	9.842
TCGA-ZG-A8QY-01	Primary Tumor	5.588	4.264	0	9.533
TCGA-KK-A7AW-01	Primary Tumor	5.587	0	0	8.802
TCGA-EJ-A8FP-01	Primary Tumor	5.585	1.88	0	9.666
TCGA-HC-7078-01	Primary Tumor	5.582	1.809	0.9071	9.975
TCGA-CH-5740-01	Primary Tumor	5.581	1.237	0	9.457
TCGA-G9-6361-01	Primary Tumor	5.58	5.081	0	9.333
TCGA-EJ-5519-01	Primary Tumor	5.577	4.561	0	9.663
TCGA-HC-A6HY-01	Primary Tumor	5.573	0	0	10.06
TCGA-J9-A52B-01	Primary Tumor	5.563	0	0	9.677
TCGA-G9-6384-01	Primary Tumor	5.558	0.9136	0	8.779
TCGA-XJ-A9DK-01	Primary Tumor	5.555	1.521	0.5532	10.55
TCGA-EJ-A46B-01	Primary Tumor	5.54	2.716	0	9.852
TCGA-G9-6370-01	Primary Tumor	5.522	0	0	8.623
TCGA-ZG-A9LU-01	Primary Tumor	5.515	0	0	10.03
TCGA-EJ-5503-01	Primary Tumor	5.513	1.819	0.3074	8.673
TCGA-J4-A6M7-01	Primary Tumor	5.509	5.479	0	10.04
TCGA-VP-A87H-01	Primary Tumor	5.503	5.416	0	9.554
TCGA-2A-A8VV-01	Primary Tumor	5.503	0	0	9.839
TCGA-ZG-A9L2-01	Primary Tumor	5.499	0.6427	0	8.82
TCGA-EJ-5509-01	Primary Tumor	5.498	0	0	7.896
TCGA-KC-A4BR-01	Primary Tumor	5.494	2.73	0	9.96
TCGA-J4-A67N-01	Primary Tumor	5.489	5.678	1.041	9.482
TCGA-ZG-A9LY-01	Primary Tumor	5.484	4.492	3.306	9.936
TCGA-XJ-A83G-01	Primary Tumor	5.483	2.009	0	9.788
TCGA-V1-A8ML-01	Primary Tumor	5.483	0	0	9.751
TCGA-G9-6329-01	Primary Tumor	5.482	0	0	9.1
TCGA-EJ-A8FN-01	Primary Tumor	5.48	0	1.316	9.49
TCGA-VP-A879-01	Primary Tumor	5.479	4.427	0	10.04
TCGA-KK-A6E4-01	Primary Tumor	5.477	1.493	0	8.576
TCGA-YL-A9WX-01	Primary Tumor	5.47	3.733	0	10.32
TCGA-HC-7750-01	Primary Tumor	5.469	0	0	8.794
TCGA-V1-A8WV-01	Primary Tumor	5.466	6.448	0	10.67
TCGA-G9-6365-01	Primary Tumor	5.466	0	0	8.669
TCGA-V1-A8WW-01	Primary Tumor	5.461	0	0	9.562
TCGA-J4-AATZ-01	Primary Tumor	5.445	5.426	0	10.17
TCGA-HC-7747-01	Primary Tumor	5.445	1.331	0	8.275
TCGA-ZG-A9L6-01	Primary Tumor	5.439	1.179	0.9831	9.769
TCGA-EJ-7325-01	Primary Tumor	5.431	0	0	9.374
TCGA-YL-A8SC-01	Primary Tumor	5.429	0	0	10.34
TCGA-HC-7752-01	Primary Tumor	5.41	4.737	0	9.811
TCGA-KK-A6E8-01	Primary Tumor	5.401	0	0	9.24
TCGA-HC-7742-01	Primary Tumor	5.4	0	0	8.898
TCGA-M7-A723-01	Primary Tumor	5.393	3.531	0.6678	9.633
TCGA-ZG-A9L1-01	Primary Tumor	5.389	0	0	8.564
TCGA-YJ-A8SW-01	Primary Tumor	5.384	5.278	0	9.895
TCGA-V1-A8MK-01	Primary Tumor	5.382	0.6197	0.5188	9.919
TCGA-EJ-7312-01	Primary Tumor	5.381	0.6925	0.6925	9.67
TCGA-YL-A8SB-01	Primary Tumor	5.378	0	3.861	10.02
TCGA-VP-AA1N-01	Primary Tumor	5.373	0.7387	0	9.479
TCGA-2A-AAYU-01	Primary Tumor	5.366	1.182	0	9.458
TCGA-YL-A9WK-01	Primary Tumor	5.366	0	1.246	10.43
TCGA-QU-A6IO-01	Primary Tumor	5.363	1.638	0	9.283
TCGA-EJ-7793-01	Primary Tumor	5.362	1.403	0	8.456
TCGA-G9-7510-01	Primary Tumor	5.36	3.754	0	8.567
TCGA-VN-A88Q-01	Primary Tumor	5.356	0	0	10.9
TCGA-KK-A7B3-01	Primary Tumor	5.355	5.299	0	10.92
TCGA-J4-A67K-01	Primary Tumor	5.354	0.5854	0.5854	9.254
TCGA-2A-AAYF-01	Primary Tumor	5.342	5.19	2.503	9.359
TCGA-EJ-7317-01	Primary Tumor	5.341	4.616	0	8.274
TCGA-EJ-7786-01	Primary Tumor	5.333	3.437	0	8.839
TCGA-EJ-A7NG-01	Primary Tumor	5.329	3.54	2.329	9.991
TCGA-KK-A8IM-01	Primary Tumor	5.329	0	0.5078	10.13
TCGA-XK-AAIW-01	Primary Tumor	5.326	0.4291	0	9.719
TCGA-XK-AAJR-01	Primary Tumor	5.32	0.8677	0.3667	9.955
TCGA-EJ-A6RC-01	Primary Tumor	5.319	1.108	0	9.195
TCGA-G9-A9S0-01	Primary Tumor	5.316	1.044	0	9.749
TCGA-EJ-A46E-01	Primary Tumor	5.311	0	0	9.937
TCGA-QU-A6IP-01	Primary Tumor	5.308	4.361	0.6413	9.676
TCGA-EJ-5531-01	Primary Tumor	5.307	0.8596	0.4928	8.367
TCGA-G9-6377-01	Primary Tumor	5.302	0.4592	0	8.634
TCGA-VP-A87J-01	Primary Tumor	5.295	4.728	0	9.051
TCGA-HC-7745-01	Primary Tumor	5.294	0.5678	0	9.747
TCGA-V1-A9O5-01	Primary Tumor	5.292	0.4036	0	10.52
TCGA-HC-A76X-01	Primary Tumor	5.285	0	0	10.12
TCGA-G9-6494-01	Primary Tumor	5.276	0	0	8.484
TCGA-EJ-A46D-01	Primary Tumor	5.273	4.634	0.6625	10.01
TCGA-EJ-7785-01	Primary Tumor	5.273	0.665	0	8.97
TCGA-X4-A8KQ-01	Primary Tumor	5.266	1.785	0	10.21
TCGA-KK-A8IL-01	Primary Tumor	5.26	0	0	10.54
TCGA-V1-A9ZR-01	Primary Tumor	5.247	1.123	0	10.99
TCGA-2A-AAYO-01	Primary Tumor	5.243	1.035	4.109	9.785
TCGA-EJ-5532-01	Primary Tumor	5.243	0	0	8.775
TCGA-CH-5763-01	Primary Tumor	5.237	3.541	0.5467	9.131
TCGA-CH-5738-01	Primary Tumor	5.236	0.9567	0	9.03
TCGA-G9-6363-01	Primary Tumor	5.234	5.149	0	10.11
TCGA-J4-A83L-01	Primary Tumor	5.228	4.327	0	9.936
TCGA-EJ-5514-01	Primary Tumor	5.226	4.739	0	9.438
TCGA-EJ-5510-01	Primary Tumor	5.218	0	0	8.11
TCGA-2A-A8VL-01	Primary Tumor	5.216	3.628	1.348	10.13
TCGA-HI-7168-01	Primary Tumor	5.209	0.4799	0	9.702
TCGA-J4-A83N-01	Primary Tumor	5.203	4.561	0	9.747
TCGA-EJ-7791-01	Primary Tumor	5.19	1.268	2.494	8.94
TCGA-CH-5768-01	Primary Tumor	5.186	5.248	0	9.18
TCGA-J4-8198-01	Primary Tumor	5.186	0.5747	0	10.38
TCGA-VP-A876-01	Primary Tumor	5.184	0.6367	0	9.993
TCGA-HI-7170-01	Primary Tumor	5.184	0.5336	0	8.405
TCGA-CH-5743-01	Primary Tumor	5.154	0	0	9.455
TCGA-EJ-A8FU-01	Primary Tumor	5.151	0.6191	0	9.75
TCGA-KK-A7AU-01	Primary Tumor	5.15	4.564	0	10.72
TCGA-HC-A8D0-01	Primary Tumor	5.14	2.418	0	10.43
TCGA-G9-6351-01	Primary Tumor	5.14	1.76	0.4442	8.647
TCGA-EJ-5498-01	Primary Tumor	5.139	0	0	8.247
TCGA-EJ-5516-01	Primary Tumor	5.134	4.13	0	8.706
TCGA-CH-5748-01	Primary Tumor	5.128	0.6327	0	9.671
TCGA-M7-A720-01	Primary Tumor	5.125	0.471	0	10.08
TCGA-HC-A631-01	Primary Tumor	5.123	0	0	10.08
TCGA-EJ-5507-01	Primary Tumor	5.11	6.538	0	9.562
TCGA-G9-7509-01	Primary Tumor	5.11	0.6301	0	9.359
TCGA-FC-7708-01	Primary Tumor	5.101	0.4258	1.021	9.945
TCGA-KK-A6E6-01	Primary Tumor	5.095	0	0	9.001
TCGA-J4-AATV-01	Primary Tumor	5.093	4.034	0.8836	9.826
TCGA-J4-A83K-01	Primary Tumor	5.078	0.4321	0	10.22
TCGA-CH-5772-01	Primary Tumor	5.073	0	0	9.456
TCGA-G9-6364-01	Primary Tumor	5.061	0.5292	0	8.5
TCGA-XA-A8JR-01	Primary Tumor	5.059	0.6256	0	9.822
TCGA-EJ-5506-01	Primary Tumor	5.041	0.0896	0	9.47
TCGA-EJ-5497-01	Primary Tumor	5.036	4.453	0	9.03
TCGA-M7-A71Y-01	Primary Tumor	5.035	0.653	0	10.12
TCGA-EJ-7123-01	Primary Tumor	5.032	0	0	8.487
TCGA-J9-A8CK-01	Primary Tumor	5.031	4.169	0.5452	10.22
TCGA-WW-A8ZI-01	Primary Tumor	5.03	0.7079	0	11.36
TCGA-2A-A8VX-01	Primary Tumor	5.025	0	0	10.3
TCGA-YL-A8HK-01	Primary Tumor	5.024	0	0	10.42
TCGA-V1-A9OH-01	Primary Tumor	5.022	5.113	0	9.114
TCGA-EJ-7328-01	Primary Tumor	5.018	1.89	0.4893	10.02
TCGA-VN-A88O-01	Primary Tumor	5.017	1.245	0	10.44
TCGA-EJ-7781-01	Primary Tumor	5.015	4.968	0.4081	8.809
TCGA-HC-7211-01	Primary Tumor	5.012	1.124	0	9.438
TCGA-ZG-A9LS-01	Primary Tumor	4.991	0	0	9.73
TCGA-XK-AAJT-01	Primary Tumor	4.989	1.924	0	9.903
TCGA-YL-A8SP-01	Primary Tumor	4.989	0.9838	0	10.82
TCGA-KK-A8I8-01	Primary Tumor	4.982	0	0	10.51
TCGA-EJ-7318-01	Primary Tumor	4.977	0.7203	0.4476	9.36
TCGA-YL-A8SK-01	Primary Tumor	4.973	2.82	0	10.25
TCGA-CH-5789-01	Primary Tumor	4.97	0.9918	0	8.903
TCGA-XJ-A9DI-01	Primary Tumor	4.963	1.839	0	10.48
TCGA-G9-6348-01	Primary Tumor	4.959	0.4008	0	8.562
TCGA-KK-A6E5-01	Primary Tumor	4.953	4.155	0	9.246
TCGA-EJ-5508-01	Primary Tumor	4.952	2.802	0	9.22
TCGA-MG-AAMC-01	Primary Tumor	4.947	0.7256	0	10.29
TCGA-YL-A8HL-01	Primary Tumor	4.944	0.8816	0	10.53
TCGA-EJ-8470-01	Primary Tumor	4.941	0.3974	0.3974	10.49
TCGA-SU-A7E7-01	Primary Tumor	4.93	4.036	0	10.36
TCGA-YL-A8SF-01	Primary Tumor	4.929	1.081	0	10.14
TCGA-CH-5746-01	Primary Tumor	4.927	3.677	0	9.817
TCGA-EJ-5502-01	Primary Tumor	4.927	2.943	0.5513	9.242
TCGA-VN-A943-01	Primary Tumor	4.927	0	0	8.895
TCGA-V1-A9OQ-01	Primary Tumor	4.925	5.588	0	9.324
TCGA-EJ-7797-01	Primary Tumor	4.921	0	0.4375	9.384
TCGA-H9-7775-01	Primary Tumor	4.912	0.4132	0	9.266
TCGA-KK-A8I4-01	Primary Tumor	4.91	1.062	0	10.53
TCGA-CH-5737-01	Primary Tumor	4.905	4.785	0	8.497
TCGA-HC-7079-01	Primary Tumor	4.902	1.453	0.4868	9.57
TCGA-CH-5762-01	Primary Tumor	4.899	4.107	0	9.496
TCGA-XQ-A8TB-01	Primary Tumor	4.885	0.5462	0	10.23
TCGA-YL-A8HJ-01	Primary Tumor	4.883	4.091	0.518	9.859
TCGA-V1-A8X3-01	Primary Tumor	4.88	4.647	0	9.627
TCGA-V1-A9O7-01	Primary Tumor	4.88	1.498	0	9.869
TCGA-G9-6373-01	Primary Tumor	4.878	1.449	0	8.895
TCGA-HC-A8D1-01	Primary Tumor	4.865	1.371	0	9.686
TCGA-G9-6336-01	Primary Tumor	4.862	1.596	0	8.304
TCGA-ZG-A9M4-01	Primary Tumor	4.859	2.222	1.19	10.21
TCGA-HC-A6AL-01	Primary Tumor	4.856	0	0	9.36
TCGA-VN-A88M-01	Primary Tumor	4.849	4.213	0	10.37
TCGA-HC-7820-01	Primary Tumor	4.849	0.4443	0	9.362
TCGA-J4-A83M-01	Primary Tumor	4.836	0.5077	0	10.05
TCGA-M7-A71Z-01	Primary Tumor	4.815	0.5908	0	10.13
TCGA-KK-A8IG-01	Primary Tumor	4.812	0	0.5778	9.601
TCGA-YL-A8SJ-01	Primary Tumor	4.808	0	0	10.78
TCGA-EJ-5501-01	Primary Tumor	4.794	0.5884	0	8.663
TCGA-EJ-7792-01	Primary Tumor	4.781	0.8726	0	9.168
TCGA-EJ-7331-01	Primary Tumor	4.777	0.3874	0	9.204
TCGA-G9-7522-01	Primary Tumor	4.775	6.505	0	8.697
TCGA-VP-A878-01	Primary Tumor	4.775	0	0	10.17
TCGA-J9-A8CM-01	Primary Tumor	4.774	0.8183	0	10.24
TCGA-XK-AAIV-01	Primary Tumor	4.771	4.598	0	9.526
TCGA-EJ-7784-01	Primary Tumor	4.763	0	0	9.634
TCGA-EJ-A7NN-01	Primary Tumor	4.756	1.192	0	9.989
TCGA-HC-7231-01	Primary Tumor	4.755	5.778	0	9.052
TCGA-HC-8213-01	Primary Tumor	4.742	5.227	0	9.472
TCGA-CH-5792-01	Primary Tumor	4.741	0.5993	0	8.71
TCGA-TK-A8OK-01	Primary Tumor	4.734	2.036	0	9.608
TCGA-2A-A8VO-01	Primary Tumor	4.729	0	0	10.16
TCGA-HC-7210-01	Primary Tumor	4.71	6.638	0	8.782
TCGA-EJ-5525-01	Primary Tumor	4.698	4.649	0	8.971
TCGA-ZG-A9ND-01	Primary Tumor	4.695	0	0	9.388
TCGA-KK-A6DY-01	Primary Tumor	4.693	0	0	10.3
TCGA-J4-A67T-01	Primary Tumor	4.692	0.5144	0	10.07
TCGA-EJ-7218-01	Primary Tumor	4.688	4.175	0	9.428
TCGA-G9-6498-01	Primary Tumor	4.681	0	1.482	9.608
TCGA-HC-A9TE-01	Primary Tumor	4.672	1.195	0	10.99
TCGA-EJ-7327-01	Primary Tumor	4.665	0.6845	0	9.208
TCGA-FC-A4JI-01	Primary Tumor	4.662	3.704	0	10.83
TCGA-V1-A9Z9-01	Primary Tumor	4.659	3.85	0	9.644
TCGA-EJ-7783-01	Primary Tumor	4.647	0	0	9.596
TCGA-HC-7748-01	Primary Tumor	4.633	0.8971	0.3386	8.723
TCGA-EJ-5530-01	Primary Tumor	4.632	4.903	0.3489	9.471
TCGA-J4-A67M-01	Primary Tumor	4.621	1.211	0	9.069
TCGA-YL-A8SR-01	Primary Tumor	4.62	0.5336	0	10.74
TCGA-CH-5794-01	Primary Tumor	4.614	0.3885	0	8.76
TCGA-XK-AAJP-01	Primary Tumor	4.607	0	0	10.27
TCGA-VN-A88P-01	Primary Tumor	4.603	0	0	10.13
TCGA-J4-A6G1-01	Primary Tumor	4.601	3.363	0	10.35
TCGA-KK-A7B4-01	Primary Tumor	4.595	0	0	10.62
TCGA-CH-5771-01	Primary Tumor	4.581	0.8638	0	8.589
TCGA-HC-7075-01	Primary Tumor	4.58	0	0	8.989
TCGA-EJ-A65G-01	Primary Tumor	4.56	1.453	0	10.01
TCGA-VP-A87C-01	Primary Tumor	4.53	4.272	0	9.582
TCGA-V1-A8MU-01	Primary Tumor	4.526	2.258	0	10.36
TCGA-HC-7821-01	Primary Tumor	4.524	4.301	0	9.782
TCGA-XK-AAJA-01	Primary Tumor	4.524	0.7036	0	10.41
TCGA-YL-A8S8-01	Primary Tumor	4.519	5.139	0	10.37
TCGA-CH-5767-01	Primary Tumor	4.507	4.51	0	9.166
TCGA-ZG-A8QW-01	Primary Tumor	4.507	0	0	9.683
TCGA-EJ-5504-01	Primary Tumor	4.504	0.5287	0	8.69
TCGA-ZG-A9LZ-01	Primary Tumor	4.5	2.547	5.479	9.874
TCGA-HC-A4ZV-01	Primary Tumor	4.491	0	0	10.58
TCGA-G9-6342-01	Primary Tumor	4.481	0.4471	0.4471	9.317
TCGA-EJ-7314-01	Primary Tumor	4.479	3.661	0	8.238
TCGA-VP-A87E-01	Primary Tumor	4.476	2.841	0	8.811
TCGA-YL-A9WI-01	Primary Tumor	4.469	0	0	9.696
TCGA-J4-8200-01	Primary Tumor	4.456	3.276	0	9.974
TCGA-CH-5769-01	Primary Tumor	4.438	0	0	8.784
TCGA-HC-8257-01	Primary Tumor	4.429	4.095	0	9.819
TCGA-HC-7232-01	Primary Tumor	4.425	1.255	0	8.944
TCGA-EJ-A65J-01	Primary Tumor	4.416	0	0	8.977
TCGA-HC-7819-01	Primary Tumor	4.411	5.095	0	9.676
TCGA-QU-A6IN-01	Primary Tumor	4.408	1.066	1.066	9.754
TCGA-J9-A52E-01	Primary Tumor	4.407	0	0	9.671
TCGA-KC-A7FA-01	Primary Tumor	4.405	1.442	0	10.57
TCGA-ZG-A8QZ-01	Primary Tumor	4.38	0.8553	0	9.677
TCGA-ZG-A9MC-01	Primary Tumor	4.374	1.19	3.461	9.144
TCGA-XK-AAK1-01	Primary Tumor	4.37	5.797	0	9.264
TCGA-EJ-5542-01	Primary Tumor	4.364	0.6975	0	8.978
TCGA-HC-7209-01	Primary Tumor	4.349	1.285	0	8.465
TCGA-KK-A59X-01	Primary Tumor	4.346	0	0	10
TCGA-KK-A8I9-01	Primary Tumor	4.326	0	0	10.53
TCGA-EJ-5499-01	Primary Tumor	4.309	0	0	8.155
TCGA-KK-A8IC-01	Primary Tumor	4.308	0	0	9.74
TCGA-EJ-7782-01	Primary Tumor	4.292	5.03	0	9.211
TCGA-KK-A6E7-01	Primary Tumor	4.286	1.348	0	9.493
TCGA-HC-7077-01	Primary Tumor	4.248	0	0	8.622
TCGA-YL-A9WL-01	Primary Tumor	4.229	0	0.376	10.36
TCGA-G9-6332-01	Primary Tumor	4.214	0.5251	0	9.086
TCGA-XJ-A83H-01	Primary Tumor	4.208	0.7039	0	9.6
TCGA-EJ-5521-01	Primary Tumor	4.202	0.9031	0	7.926
TCGA-CH-5788-01	Primary Tumor	4.195	0.7837	0	9.546
TCGA-HC-7749-01	Primary Tumor	4.193	3.549	0	9.194
TCGA-4L-AA1F-01	Primary Tumor	4.174	4.444	1.662	9.751
TCGA-CH-5761-01	Primary Tumor	4.159	4.214	0	9.899
TCGA-EJ-5518-01	Primary Tumor	4.156	0.7449	0	9.213
TCGA-V1-A8WS-01	Primary Tumor	4.153	4.481	0.4106	10.2
TCGA-YL-A9WY-01	Primary Tumor	4.153	0.7061	0	10.41
TCGA-G9-6354-01	Primary Tumor	4.118	0	0.6497	9.512
TCGA-KC-A7FD-01	Primary Tumor	4.115	0	0	10.54
TCGA-ZG-A8QX-01	Primary Tumor	4.101	0	0	9.305
TCGA-FC-A5OB-01	Primary Tumor	4.092	5.738	0	9.285
TCGA-G9-6338-01	Primary Tumor	4.087	1.378	0	9.474
TCGA-EJ-5495-01	Primary Tumor	4.085	3.064	0	8.972
TCGA-CH-5766-01	Primary Tumor	4.069	0	0	9.744
TCGA-CH-5752-01	Primary Tumor	4.054	3.678	0	9.887
TCGA-EJ-5511-01	Primary Tumor	4.052	0.626	0	9.517
TCGA-M7-A721-01	Primary Tumor	4.052	0.5725	0	9.642
TCGA-ZG-A9L5-01	Primary Tumor	4.031	0.4705	0	10.54
TCGA-YL-A9WJ-01	Primary Tumor	4.02	0.5086	0	9.78
TCGA-VP-A87K-01	Primary Tumor	4.02	0	0	10.45
TCGA-HC-7818-01	Primary Tumor	4.016	3.142	0	9.148
TCGA-EJ-7788-01	Primary Tumor	4.007	0.5251	0	9.872
TCGA-HC-7736-01	Primary Tumor	3.995	0	0	9.323
TCGA-FC-7961-01	Primary Tumor	3.989	0	0	10.28
TCGA-EJ-5496-01	Primary Tumor	3.986	3.838	0	8.63
TCGA-J9-A52D-01	Primary Tumor	3.974	0	0	9.8
TCGA-EJ-5524-01	Primary Tumor	3.971	0.7973	0	9.364
TCGA-EJ-8474-01	Primary Tumor	3.971	0.5213	0	9.917
TCGA-EJ-7321-01	Primary Tumor	3.946	5.327	0.5098	9.058
TCGA-EJ-5526-01	Primary Tumor	3.914	1.42	0	9.826
TCGA-G9-6339-01	Primary Tumor	3.869	0	0	9.401
TCGA-KK-A8IA-01	Primary Tumor	3.868	0	0	10.44
TCGA-EJ-8472-01	Primary Tumor	3.863	2.222	0	10.62
TCGA-CH-5765-01	Primary Tumor	3.838	0	0	9.88
TCGA-VP-A875-01	Primary Tumor	3.822	0	0	11.12
TCGA-KC-A4BN-01	Primary Tumor	3.815	0	0	9.887
TCGA-EJ-5527-01	Primary Tumor	3.808	0.4838	0	8.975
TCGA-HC-A48F-01	Primary Tumor	3.793	0	0.5007	10.59
TCGA-V1-A9O9-01	Primary Tumor	3.789	0.6588	0	10.49
TCGA-EJ-A65F-01	Primary Tumor	3.776	0	0.5128	10.16
TCGA-G9-6362-01	Primary Tumor	3.747	0	1.207	10.5
TCGA-YL-A8SL-01	Primary Tumor	3.726	0	0	10.76
TCGA-HC-7230-01	Primary Tumor	3.701	4.85	0	9.67
TCGA-CH-5744-01	Primary Tumor	3.698	0.76	0	9.528
TCGA-J4-A83J-01	Primary Tumor	3.698	0.5139	0	10.16
TCGA-EJ-A65D-01	Primary Tumor	3.696	0.8825	0	9.692
TCGA-HC-A632-01	Primary Tumor	3.696	0	0	10.38
TCGA-KK-A6E1-01	Primary Tumor	3.696	0	0	10.3
TCGA-CH-5739-01	Primary Tumor	3.692	4.957	0	9.002
TCGA-V1-A8MJ-01	Primary Tumor	3.638	1.326	0	9.596
TCGA-HC-7738-01	Primary Tumor	3.628	0	0	9.563
TCGA-G9-7521-01	Primary Tumor	3.574	0	0	9.658
TCGA-HC-7212-01	Primary Tumor	3.562	3.917	0	9.338
TCGA-EJ-A7NF-01	Primary Tumor	3.519	1.598	0	10.06
TCGA-KK-A6E2-01	Primary Tumor	3.51	2.648	0	9.56
TCGA-CH-5790-01	Primary Tumor	3.488	4.236	1.062	9.725
TCGA-HC-7213-01	Primary Tumor	3.488	3.205	0	9.159
TCGA-ZG-A9L4-01	Primary Tumor	3.466	0.4565	0	9.058
TCGA-HC-7081-01	Primary Tumor	3.447	0	0	9.04
TCGA-KC-A4BV-01	Primary Tumor	3.399	0	0	10.05
TCGA-G9-7525-01	Primary Tumor	3.385	0.5072	0	8.221
TCGA-HC-8262-01	Primary Tumor	3.338	4.605	0.4102	9.531
TCGA-YL-A8S9-01	Primary Tumor	3.269	5.703	0	10.01
TCGA-2A-A8W1-01	Primary Tumor	3.248	0	0	10.47
TCGA-CH-5764-01	Primary Tumor	3.194	0	0.8601	9.102
TCGA-QU-A6IL-01	Primary Tumor	3.191	0	0	9.356
TCGA-HC-7744-01	Primary Tumor	3.1	0	0	8.393
TCGA-CH-5753-01	Primary Tumor	3.067	0	0	10.45
TCGA-CH-5791-01	Primary Tumor	3.06	0	0.6507	9.363
TCGA-V1-A9ZG-01	Primary Tumor	3.059	0.4508	0	9.635
TCGA-HI-7171-01	Primary Tumor	2.954	5.526	0	10.32
TCGA-2A-A8W3-01	Primary Tumor	2.835	3.054	0	9.41
TCGA-J9-A8CP-01	Primary Tumor	2.818	0.9211	0	9.483
TCGA-HC-A6AO-01	Primary Tumor	2.811	0	0	9.307
TCGA-EJ-7125-01	Primary Tumor	2.764	0	0	8.372
TCGA-KK-A8IK-01	Primary Tumor	2.716	0.6389	0	10.94
TCGA-YL-A9WH-01	Primary Tumor	2.684	0.4831	0	10.08
TCGA-Y6-A9XI-01	Primary Tumor	2.676	5.023	0	10.59
TCGA-HC-A9TH-01	Primary Tumor	2.669	0.3822	0	10.4
TCGA-EJ-7315-01	Primary Tumor	2.633	0	0	8.245
TCGA-YL-A8SA-01	Primary Tumor	2.536	0	0.6165	10.58
TCGA-HC-A8CY-01	Primary Tumor	2.531	0	0	10.22
TCGA-ZG-A9N3-01	Primary Tumor	2.353	1.268	0	9.595
TCGA-KK-A59V-01	Primary Tumor	2.229	4.672	0	10.5
TCGA-EJ-8469-01	Primary Tumor	2.076	0	0	9.652
TCGA-HC-8264-01	Primary Tumor	0	0	0	9.881
