# Supplementary material for: Implications of the KHDC4-TRAF2 axis in the context of prostate cancer prognosis
Source: Aging (Albany NY). 2025 Jun 23;17(6):1544–70. doi: 10.18632/aging.206273 (PMC12245195; doi:10.18632/aging.206273)
Supplement: Supplementary Table 4 [file aging-17-206273-s005.xlsx]

## Sheet: Supplementary Table 4
Supplementary Table 4. Related levels of KHDC4 and TRAF2 in pathologic_T and pathologic_N in TCGA-PRAD transcriptome profiles.
samples	sample_type	KIAA0907	TRAF2	pathologic_T	pathologic_N
TCGA-V1-A9O5-06	Metastatic	10.5	9.162	T4	N1
TCGA-G9-6362-11	Solid Tissue Normal	10.88	9.253	T3a	N0
TCGA-HC-8262-11	Solid Tissue Normal	10.17	8.778	T2c	N0
TCGA-HC-8260-11	Solid Tissue Normal	10.02	8.466	T2c	N0
TCGA-G9-6365-11	Solid Tissue Normal	9.994	9.245	T4	N0
TCGA-J4-A83J-11	Solid Tissue Normal	9.944	8.951	T2c	N0
TCGA-HC-7740-11	Solid Tissue Normal	9.911	8.252	T2c	N0
TCGA-HC-7211-11	Solid Tissue Normal	9.903	8.091	T2c	N0
TCGA-HC-7738-11	Solid Tissue Normal	9.809	8.292	T2c
TCGA-HC-8259-11	Solid Tissue Normal	9.743	8.71	T2a
TCGA-G9-6333-11	Solid Tissue Normal	9.629	9.364	T2c	N0
TCGA-G9-6356-11	Solid Tissue Normal	9.607	9.519	T3b	N0
TCGA-EJ-7793-11	Solid Tissue Normal	9.455	8.599	T2c
TCGA-CH-5767-11	Solid Tissue Normal	9.406	8.324	T2c	N0
TCGA-G9-6363-11	Solid Tissue Normal	9.327	9.021	T4	N0
TCGA-HC-8258-11	Solid Tissue Normal	9.287	8.455	T2c	N0
TCGA-EJ-A8FO-11	Solid Tissue Normal	9.258	8.734	T3a	N0
TCGA-EJ-7792-11	Solid Tissue Normal	9.256	8.62	T2c	N0
TCGA-EJ-7785-11	Solid Tissue Normal	9.133	8.111	T3a	N0
TCGA-EJ-7794-11	Solid Tissue Normal	9.111	8.438	T2c	N0
TCGA-EJ-7789-11	Solid Tissue Normal	9.108	8.235	T3a	N0
TCGA-CH-5768-11	Solid Tissue Normal	9.086	8.487	T3a	N0
TCGA-EJ-7327-11	Solid Tissue Normal	9.084	8.234	T3b	N0
TCGA-EJ-7328-11	Solid Tissue Normal	9.068	8.541	T3a	N0
TCGA-EJ-7797-11	Solid Tissue Normal	9.045	8.481	T2c	N0
TCGA-EJ-7321-11	Solid Tissue Normal	9.042	8.52	T3a	N0
TCGA-HC-7745-11	Solid Tissue Normal	9.002	8.458	T3b	N0
TCGA-HC-7819-11	Solid Tissue Normal	8.951	8.579	T2c	N0
TCGA-HC-7747-11	Solid Tissue Normal	8.943	8.224	T2c	N0
TCGA-EJ-7784-11	Solid Tissue Normal	8.919	8.279	T2c	N0
TCGA-EJ-7125-11	Solid Tissue Normal	8.88	8.123	T2c	N0
TCGA-G9-6348-11	Solid Tissue Normal	8.877	8.883	T2c	N0
TCGA-CH-5761-11	Solid Tissue Normal	8.851	9.023	T3b	N0
TCGA-G9-6499-11	Solid Tissue Normal	8.841	8.72	T3a	N0
TCGA-EJ-7781-11	Solid Tissue Normal	8.829	8.128	T2c	N0
TCGA-HC-7752-11	Solid Tissue Normal	8.826	9.263	T2c	N0
TCGA-EJ-7115-11	Solid Tissue Normal	8.8	8.48	T3a	N0
TCGA-G9-6496-11	Solid Tissue Normal	8.79	8.928	T2c	N0
TCGA-EJ-7315-11	Solid Tissue Normal	8.776	8.812	T3a	N0
TCGA-EJ-7786-11	Solid Tissue Normal	8.776	7.956	T2c	N0
TCGA-EJ-7331-11	Solid Tissue Normal	8.771	8.482	T2c	N0
TCGA-HC-7737-11	Solid Tissue Normal	8.696	8.112	T2c	N1
TCGA-G9-6351-11	Solid Tissue Normal	8.67	8.623	T2c
TCGA-EJ-7782-11	Solid Tissue Normal	8.67	7.918	T2c	N0
TCGA-G9-6384-11	Solid Tissue Normal	8.649	8.612	T3a	N0
TCGA-CH-5769-11	Solid Tissue Normal	8.612	9.237	T3b	N0
TCGA-EJ-7783-11	Solid Tissue Normal	8.582	8.605	T3a	N0
TCGA-EJ-7317-11	Solid Tissue Normal	8.393	8.167	T2c	N0
TCGA-EJ-7330-11	Solid Tissue Normal	8.363	8.309	T3a	N0
TCGA-G9-6342-11	Solid Tissue Normal	8.342	8.817	T3a
TCGA-EJ-7314-11	Solid Tissue Normal	8.272	8.001	T3b	N0
TCGA-EJ-7123-11	Solid Tissue Normal	8.26	7.816	T2c	N0
TCGA-HC-7742-11	Solid Tissue Normal	8.235	8.821	T3a	N0
TCGA-KK-A8ID-01	Primary Tumor	11.52	8.786	T3b	N1
TCGA-XQ-A8TA-01	Primary Tumor	11.49	9.12
TCGA-WW-A8ZI-01	Primary Tumor	11.36	9.235	T2c	N0
TCGA-V1-A9OT-01	Primary Tumor	11.16	9.267	T2c
TCGA-VP-A875-01	Primary Tumor	11.12	9.24	T3a	N0
TCGA-ZG-A9KY-01	Primary Tumor	11	8.997	T4	N1
TCGA-V1-A9ZR-01	Primary Tumor	10.99	9.348	T4	N0
TCGA-HC-A9TE-01	Primary Tumor	10.99	9.933	T3b	N0
TCGA-XJ-A9DX-01	Primary Tumor	10.97	9.439	T3b	N1
TCGA-KK-A8IK-01	Primary Tumor	10.94	8.906	T2c	N0
TCGA-KK-A7B3-01	Primary Tumor	10.92	9.121	T3b	N0
TCGA-VN-A88Q-01	Primary Tumor	10.9	9.852	T2c	N0
TCGA-VN-A88K-01	Primary Tumor	10.83	9.206	T3a	N1
TCGA-FC-A4JI-01	Primary Tumor	10.83	8.968	T3a
TCGA-HC-8265-01	Primary Tumor	10.82	9.017	T3a	N0
TCGA-YL-A8SP-01	Primary Tumor	10.82	8.797	T3b
TCGA-YL-A8SJ-01	Primary Tumor	10.78	9.293	T3b	N0
TCGA-V1-A8MG-01	Primary Tumor	10.77	9.083	T3b
TCGA-KK-A7AP-01	Primary Tumor	10.77	9.348	T3b	N1
TCGA-YL-A8SL-01	Primary Tumor	10.76	9.448	T3b	N1
TCGA-YL-A8SR-01	Primary Tumor	10.74	8.833	T3a	N0
TCGA-KK-A7AU-01	Primary Tumor	10.72	9.58	T3b	N1
TCGA-TP-A8TT-01	Primary Tumor	10.69	9.122	T3a	N0
TCGA-V1-A8WV-01	Primary Tumor	10.67	10.41	T3b	N1
TCGA-CH-5751-01	Primary Tumor	10.65	8.966	T4	N1
TCGA-KK-A7AZ-01	Primary Tumor	10.64	9.441	T3a	N0
TCGA-KK-A8II-01	Primary Tumor	10.64	8.776	T3a	N0
TCGA-EJ-8472-01	Primary Tumor	10.62	8.893	T3a	N0
TCGA-EJ-A46G-01	Primary Tumor	10.62	9.629	T3a	N0
TCGA-KK-A7B4-01	Primary Tumor	10.62	9.773	T3b	N1
TCGA-J4-A83I-01	Primary Tumor	10.6	9.107	T3a	N0
TCGA-Y6-A9XI-01	Primary Tumor	10.59	9.421	[Discrepancy]	N0
TCGA-HC-A48F-01	Primary Tumor	10.59	9.271	T2c	N1
TCGA-YL-A8SA-01	Primary Tumor	10.58	9.571	T3b	N0
TCGA-HC-A4ZV-01	Primary Tumor	10.58	9.898	T3b	N0
TCGA-KC-A7FA-01	Primary Tumor	10.57	9.13	T3a	N0
TCGA-XJ-A9DK-01	Primary Tumor	10.55	9.041	T2c
TCGA-KC-A7FD-01	Primary Tumor	10.54	8.493	T3a	N0
TCGA-KK-A8IL-01	Primary Tumor	10.54	9.331	T3b	N1
TCGA-ZG-A9L5-01	Primary Tumor	10.54	9.75	T4	N1
TCGA-YL-A8SO-01	Primary Tumor	10.54	9.493	T3a
TCGA-KK-A8I9-01	Primary Tumor	10.53	9.287	T3a	N0
TCGA-KK-A8I4-01	Primary Tumor	10.53	9.12	T3b	N1
TCGA-YL-A8HL-01	Primary Tumor	10.53	9.36	T3b	N1
TCGA-V1-A9O5-01	Primary Tumor	10.52	9.382	T4	N1
TCGA-KK-A8I8-01	Primary Tumor	10.51	9.183	T3b	N0
TCGA-KC-A7F6-01	Primary Tumor	10.5	9.174	T2c	N0
TCGA-KK-A59V-01	Primary Tumor	10.5	9.476	T3b	N0
TCGA-G9-6362-01	Primary Tumor	10.5	9.168	T3a	N0
TCGA-X4-A8KS-01	Primary Tumor	10.49	9.238	T2c
TCGA-V1-A9O9-01	Primary Tumor	10.49	9.209	T3b	N0
TCGA-HC-8260-01	Primary Tumor	10.49	8.647	T2c	N0
TCGA-EJ-A7NH-01	Primary Tumor	10.49	8.962	T2c	N0
TCGA-EJ-8470-01	Primary Tumor	10.49	8.75	T2c	N0
TCGA-XJ-A9DI-01	Primary Tumor	10.48	9.408	T3b	N0
TCGA-2A-A8W1-01	Primary Tumor	10.47	8.505	T3a	N0
TCGA-2A-A8VT-01	Primary Tumor	10.47	8.671	T4	N1
TCGA-G9-A9S4-01	Primary Tumor	10.46	9.372	T3b	N1
TCGA-CH-5753-01	Primary Tumor	10.45	8.959	T3b	N1
TCGA-VP-A87K-01	Primary Tumor	10.45	9.363	T3b	N0
TCGA-VN-A88O-01	Primary Tumor	10.44	8.91	T2c	N0
TCGA-KK-A8IA-01	Primary Tumor	10.44	9.204	T3b	N1
TCGA-EJ-A7NM-01	Primary Tumor	10.44	9.316	T3b	N1
TCGA-HC-A8D0-01	Primary Tumor	10.43	9.069	T2a	N0
TCGA-YL-A9WK-01	Primary Tumor	10.43	9.044	T3b	N0
TCGA-YL-A8HK-01	Primary Tumor	10.42	8.984	T3b	N0
TCGA-HC-A76W-01	Primary Tumor	10.42	9.357	T3b	N0
TCGA-XK-AAJA-01	Primary Tumor	10.41	9.428	T3a	N0
TCGA-YL-A9WY-01	Primary Tumor	10.41	8.952	T3b	N1
TCGA-KC-A7F5-01	Primary Tumor	10.4	9.411	T2c	N0
TCGA-V1-A9OL-01	Primary Tumor	10.4	9.917	T3b	N0
TCGA-KK-A7AV-01	Primary Tumor	10.4	9.373	T2c	N0
TCGA-TP-A8TV-01	Primary Tumor	10.4	8.928	T2c	N0
TCGA-HC-A9TH-01	Primary Tumor	10.4	9.092	T3b	N0
TCGA-VP-A87D-01	Primary Tumor	10.4	9.229	T3a	N1
TCGA-V1-A8WL-01	Primary Tumor	10.39	8.559	T3a	N0
TCGA-XJ-A9DQ-01	Primary Tumor	10.39	9.094	T2a
TCGA-HC-A632-01	Primary Tumor	10.38	10.11	T3a	N0
TCGA-J4-8198-01	Primary Tumor	10.38	8.804	T3b
TCGA-VN-A88M-01	Primary Tumor	10.37	9.035	T2c	N0
TCGA-EJ-A65E-01	Primary Tumor	10.37	8.652	T3b	N0
TCGA-YL-A8S8-01	Primary Tumor	10.37	8.528	T3a	N0
TCGA-YL-A9WL-01	Primary Tumor	10.36	8.957	T3a	N0
TCGA-V1-A8MU-01	Primary Tumor	10.36	9.031	T3a	N1
TCGA-SU-A7E7-01	Primary Tumor	10.36	8.774	T2b	N0
TCGA-J4-A6G1-01	Primary Tumor	10.35	9.394	T3a	N0
TCGA-KK-A8IH-01	Primary Tumor	10.34	9.425	T3a	N0
TCGA-YL-A8SC-01	Primary Tumor	10.34	9.463	T3a	N0
TCGA-V1-A9ZI-01	Primary Tumor	10.34	9.627	T3b	N0
TCGA-V1-A8MM-01	Primary Tumor	10.33	8.939	T3a	N0
TCGA-YL-A9WX-01	Primary Tumor	10.32	9.045	T3b	N1
TCGA-HI-7171-01	Primary Tumor	10.32	9.751	T3b	N0
TCGA-M7-A724-01	Primary Tumor	10.31	9.529	T3a	N0
TCGA-KK-A6E1-01	Primary Tumor	10.3	8.379	T3b	N1
TCGA-2A-A8VX-01	Primary Tumor	10.3	9.21	T3b	N0
TCGA-YL-A8SQ-01	Primary Tumor	10.3	9.24	T3b	N0
TCGA-KK-A6DY-01	Primary Tumor	10.3	9.187	T2c	N0
TCGA-M7-A725-01	Primary Tumor	10.29	8.72	T3b	N0
TCGA-MG-AAMC-01	Primary Tumor	10.29	9.157	T3a	N0
TCGA-YL-A8SH-01	Primary Tumor	10.29	9.181	T3a	N0
TCGA-VN-A88L-01	Primary Tumor	10.28	9.289	T2c	N0
TCGA-FC-7961-01	Primary Tumor	10.28	8.457	T3a	N0
TCGA-KK-A7B1-01	Primary Tumor	10.27	9.374	T3a	N0
TCGA-XK-AAJP-01	Primary Tumor	10.27	9.049	T3a	N0
TCGA-FC-A8O0-01	Primary Tumor	10.26	8.695	T3a	N0
TCGA-XK-AAJ3-01	Primary Tumor	10.26	8.894	T3a	N0
TCGA-YL-A8SK-01	Primary Tumor	10.25	8.891	T3b	N1
TCGA-XJ-A83F-01	Primary Tumor	10.25	9.638	T3a	N0
TCGA-J9-A8CM-01	Primary Tumor	10.24	8.748	T3b	N1
TCGA-XQ-A8TB-01	Primary Tumor	10.23	8.553	T3b	N0
TCGA-KK-A5A1-01	Primary Tumor	10.23	8.851	T3b	N0
TCGA-J9-A8CK-01	Primary Tumor	10.22	9.1	T3a
TCGA-J4-A83K-01	Primary Tumor	10.22	8.888	T2c
TCGA-HC-A8CY-01	Primary Tumor	10.22	9.431	T3a	N1
TCGA-X4-A8KQ-01	Primary Tumor	10.21	9.371	T3b	N0
TCGA-ZG-A9M4-01	Primary Tumor	10.21	10	T3b	N1
TCGA-V1-A8WS-01	Primary Tumor	10.2	8.834	T3b
TCGA-XK-AAJU-01	Primary Tumor	10.19	9.449	T2c	N0
TCGA-VP-A878-01	Primary Tumor	10.17	9.212	T2c	N1
TCGA-G9-A9S7-01	Primary Tumor	10.17	9.472	T3a	N0
TCGA-J4-AATZ-01	Primary Tumor	10.17	9.292	T3a	N0
TCGA-EJ-A65F-01	Primary Tumor	10.16	8.769	T3b	N0
TCGA-2A-A8VO-01	Primary Tumor	10.16	8.825	T3a
TCGA-J4-A83J-01	Primary Tumor	10.16	8.893	T2c	N0
TCGA-V1-A9OY-01	Primary Tumor	10.15	9.135	T3a	N1
TCGA-ZG-A9L0-01	Primary Tumor	10.14	9.131	T3b	N1
TCGA-YL-A8SF-01	Primary Tumor	10.14	8.867	T3b	N0
TCGA-M7-A71Z-01	Primary Tumor	10.13	9.624	T3a	N0
TCGA-KK-A8IM-01	Primary Tumor	10.13	8.97	T2c	N0
TCGA-2A-A8VL-01	Primary Tumor	10.13	8.534	T2b	N0
TCGA-VN-A88P-01	Primary Tumor	10.13	9.003	T2c	N0
TCGA-KK-A7AQ-01	Primary Tumor	10.12	9.561	T2c	N0
TCGA-M7-A71Y-01	Primary Tumor	10.12	9.186	T2c
TCGA-J4-A6G3-01	Primary Tumor	10.12	8.87	T3b	N0
TCGA-HC-A76X-01	Primary Tumor	10.12	8.754	T2c	N0
TCGA-EJ-A7NK-01	Primary Tumor	10.11	8.811	T3a	N0
TCGA-G9-6363-01	Primary Tumor	10.11	8.401	T4	N0
TCGA-J9-A8CL-01	Primary Tumor	10.1	9.317	T3b
TCGA-HC-8266-01	Primary Tumor	10.09	9.679	T3b	N0
TCGA-YL-A9WH-01	Primary Tumor	10.08	9.65	T3b	N1
TCGA-M7-A720-01	Primary Tumor	10.08	8.928	T2c
TCGA-HC-A631-01	Primary Tumor	10.08	8.813	T2c	N0
TCGA-Y6-A8TL-01	Primary Tumor	10.08	8.856	T3a	N0
TCGA-V1-A9OA-01	Primary Tumor	10.08	8.829	T3b	N1
TCGA-J4-A67T-01	Primary Tumor	10.07	8.741	T2c
TCGA-EJ-A7NF-01	Primary Tumor	10.06	8.764	T2c	N0
TCGA-VN-A88N-01	Primary Tumor	10.06	9.025	T2c	N0
TCGA-HC-A6HY-01	Primary Tumor	10.06	9.666	T2c
TCGA-J4-A83M-01	Primary Tumor	10.05	9.011	T2c	N0
TCGA-V1-A8WN-01	Primary Tumor	10.05	8.317	T2c
TCGA-KC-A4BV-01	Primary Tumor	10.05	8.581	T3a	N0
TCGA-CH-5754-01	Primary Tumor	10.04	9.177	T3b	N1
TCGA-V1-A9OX-01	Primary Tumor	10.04	9.106	T2c	N0
TCGA-VP-A879-01	Primary Tumor	10.04	8.846	T2b	N0
TCGA-J4-A6M7-01	Primary Tumor	10.04	8.808	T2c
TCGA-ZG-A9LU-01	Primary Tumor	10.03	9.417	T3a	N0
TCGA-KC-A4BL-01	Primary Tumor	10.02	9.171	T2c	N0
TCGA-EJ-7328-01	Primary Tumor	10.02	9.29	T3a	N0
TCGA-VN-A88I-01	Primary Tumor	10.02	9.312	T3a	N0
TCGA-YL-A8SB-01	Primary Tumor	10.02	8.855	T3a	N0
TCGA-EJ-A46D-01	Primary Tumor	10.01	9.095	T2c	N0
TCGA-EJ-A65G-01	Primary Tumor	10.01	8.494	T2c	N0
TCGA-YL-A8S9-01	Primary Tumor	10.01	8.941	T3a	N0
TCGA-KK-A59X-01	Primary Tumor	10	9.14	T3b	N1
TCGA-EJ-7789-01	Primary Tumor	9.995	9.417	T3a	N0
TCGA-VP-A876-01	Primary Tumor	9.993	9.154	T2c	N0
TCGA-EJ-A7NG-01	Primary Tumor	9.991	8.856	T3a	N0
TCGA-EJ-A7NN-01	Primary Tumor	9.989	8.964	T3b	N1
TCGA-HC-7078-01	Primary Tumor	9.975	9.085	T3a	N0
TCGA-V1-A9OF-01	Primary Tumor	9.975	8.495	T2c
TCGA-J4-8200-01	Primary Tumor	9.974	8.064	T2c	N0
TCGA-ZG-A9LN-01	Primary Tumor	9.969	9.109	T3b	N1
TCGA-KC-A7F3-01	Primary Tumor	9.967	8.557	T2c	N0
TCGA-KC-A4BR-01	Primary Tumor	9.96	8.582	T3b	N1
TCGA-KK-A8I6-01	Primary Tumor	9.96	8.925	T3a	N0
TCGA-XK-AAJR-01	Primary Tumor	9.955	8.992	T3a	N0
TCGA-FC-7708-01	Primary Tumor	9.945	8.442	T3a	N0
TCGA-EJ-A46E-01	Primary Tumor	9.937	8.885		N0
TCGA-ZG-A9LY-01	Primary Tumor	9.936	9.017	T3b	N1
TCGA-J4-A83L-01	Primary Tumor	9.936	8.199	T2c	N0
TCGA-VN-A88R-01	Primary Tumor	9.934	8.832	T2c	N0
TCGA-VP-A87B-01	Primary Tumor	9.931	8.757	T2b	N0
TCGA-EJ-A46F-01	Primary Tumor	9.929	9.492	T3b	N1
TCGA-V1-A8MK-01	Primary Tumor	9.919	8.628	T2c	N0
TCGA-EJ-8474-01	Primary Tumor	9.917	8.639	T3a	N0
TCGA-XK-AAJT-01	Primary Tumor	9.903	9.26	T3a	N0
TCGA-CH-5761-01	Primary Tumor	9.899	8.935	T3b	N0
TCGA-YJ-A8SW-01	Primary Tumor	9.895	8.208	T3b	N0
TCGA-KK-A6E0-01	Primary Tumor	9.893	8.462	T3a	N0
TCGA-KC-A4BN-01	Primary Tumor	9.887	8.306	T2a	N0
TCGA-CH-5752-01	Primary Tumor	9.887	8.223	T3a	N0
TCGA-HC-8264-01	Primary Tumor	9.881	8.265	T3b	N1
TCGA-CH-5765-01	Primary Tumor	9.88	8.389	T3a	N0
TCGA-VP-A872-01	Primary Tumor	9.876	9.61	T3a	N0
TCGA-ZG-A9LZ-01	Primary Tumor	9.874	9.295	T3b	N0
TCGA-EJ-7788-01	Primary Tumor	9.872	8.394	T3b	N0
TCGA-KK-A8I5-01	Primary Tumor	9.871	8.755	T2b	N0
TCGA-V1-A9O7-01	Primary Tumor	9.869	8.877	T3a	N0
TCGA-YL-A8HJ-01	Primary Tumor	9.859	8.783	T3b
TCGA-YL-A8HM-01	Primary Tumor	9.859	9.137	T3b	N0
TCGA-CH-5750-01	Primary Tumor	9.856	8.474	T2c	N0
TCGA-EJ-A46B-01	Primary Tumor	9.852	8.584	T3a	N0
TCGA-KC-A7FE-01	Primary Tumor	9.847	8.882	T2c	N0
TCGA-EJ-A7NJ-01	Primary Tumor	9.842	8.516	T2c	N0
TCGA-2A-A8VV-01	Primary Tumor	9.839	8.809	T2b	N0
TCGA-J4-AATV-01	Primary Tumor	9.826	9.273	T2c	N0
TCGA-EJ-5526-01	Primary Tumor	9.826	8.413	T3a	N1
TCGA-XA-A8JR-01	Primary Tumor	9.822	8.834	T2c	N0
TCGA-HC-8257-01	Primary Tumor	9.819	8.908	T3b	N1
TCGA-CH-5746-01	Primary Tumor	9.817	8.447	T2c	N0
TCGA-HC-7752-01	Primary Tumor	9.811	9.795	T2c	N0
TCGA-V1-A8MF-01	Primary Tumor	9.808	8.922	T3a	N0
TCGA-XK-AAIR-01	Primary Tumor	9.807	8.649	T2c	N0
TCGA-J9-A52D-01	Primary Tumor	9.8	8.534	T3a
TCGA-KK-A8IF-01	Primary Tumor	9.796	9.253	T3a	N0
TCGA-XJ-A83G-01	Primary Tumor	9.788	9.162	T3b	N0
TCGA-2A-AAYO-01	Primary Tumor	9.785	8.909	T2c
TCGA-HC-8259-01	Primary Tumor	9.784	8.659	T2a
TCGA-HC-7821-01	Primary Tumor	9.782	9.583	T3b	N1
TCGA-YL-A9WJ-01	Primary Tumor	9.78	8.749	T3b	N1
TCGA-YL-A8HO-01	Primary Tumor	9.774	9.157	T3a	N0
TCGA-J9-A8CN-01	Primary Tumor	9.774	8.726	T3a
TCGA-ZG-A9L6-01	Primary Tumor	9.769	8.755	T3b	N0
TCGA-EJ-A46I-01	Primary Tumor	9.76	8.889	T3a	N0
TCGA-EJ-8468-01	Primary Tumor	9.76	8.229	T3a	N0
TCGA-QU-A6IN-01	Primary Tumor	9.754	10.03	T2c	N0
TCGA-V1-A8ML-01	Primary Tumor	9.751	8.901	T2c	N0
TCGA-4L-AA1F-01	Primary Tumor	9.751	8.453	T3b	N0
TCGA-EJ-A8FU-01	Primary Tumor	9.75	8.582	T3a	N0
TCGA-G9-A9S0-01	Primary Tumor	9.749	9.172	T3b	N1
TCGA-KK-A8IB-01	Primary Tumor	9.749	9.107	T3a	N0
TCGA-HC-7745-01	Primary Tumor	9.747	8.945	T3b	N0
TCGA-J4-A83N-01	Primary Tumor	9.747	8.735	T2c
TCGA-CH-5766-01	Primary Tumor	9.744	8.32	T3a	N1
TCGA-KK-A8IC-01	Primary Tumor	9.74	9	T3b	N0
TCGA-ZG-A9LS-01	Primary Tumor	9.73	9.161	T3b	N1
TCGA-HC-8256-01	Primary Tumor	9.73	8.627	T2c
TCGA-CH-5790-01	Primary Tumor	9.725	8.74	T2c	N0
TCGA-XK-AAIW-01	Primary Tumor	9.719	9.582	T3b	N0
TCGA-HC-8261-01	Primary Tumor	9.715	8.869	T2c
TCGA-KK-A59Z-01	Primary Tumor	9.714	9.381	T2c	N0
TCGA-EJ-A46H-01	Primary Tumor	9.711	8.408	T2c	N0
TCGA-YL-A8SI-01	Primary Tumor	9.707	8.605	T3a	N0
TCGA-EJ-A8FS-01	Primary Tumor	9.703	8.383	T3a	N0
TCGA-HI-7168-01	Primary Tumor	9.702	9.034	T3b	N0
TCGA-YL-A9WI-01	Primary Tumor	9.696	8.706	T3a	N1
TCGA-KK-A7B2-01	Primary Tumor	9.695	9.343	T3a	N1
TCGA-J9-A52C-01	Primary Tumor	9.693	8.902	T3b
TCGA-EJ-A65D-01	Primary Tumor	9.692	9.986	T3a	N0
TCGA-EJ-A8FO-01	Primary Tumor	9.69	8.871	T3a	N0
TCGA-HC-A8D1-01	Primary Tumor	9.686	8.481	T2c	N0
TCGA-ZG-A8QW-01	Primary Tumor	9.683	9.33	T3b	N1
TCGA-ZG-A8QZ-01	Primary Tumor	9.677	8.856	T3b	N1
TCGA-J9-A52B-01	Primary Tumor	9.677	9.489	T3b	N0
TCGA-QU-A6IP-01	Primary Tumor	9.676	8.997	T2a	N0
TCGA-HC-7819-01	Primary Tumor	9.676	8.446	T2c	N0
TCGA-ZG-A9L9-01	Primary Tumor	9.675	9.439	T3b	N1
TCGA-J9-A52E-01	Primary Tumor	9.671	8.724	T3b	N0
TCGA-CH-5748-01	Primary Tumor	9.671	8.326	T3a	N0
TCGA-HC-7230-01	Primary Tumor	9.67	9.116	T2c	N0
TCGA-EJ-7312-01	Primary Tumor	9.67	8.861	T3b	N0
TCGA-EJ-A8FP-01	Primary Tumor	9.666	8.619	T2c	N0
TCGA-EJ-5519-01	Primary Tumor	9.663	8.837	T3b	N1
TCGA-ZG-A9LB-01	Primary Tumor	9.662	9.259	T3b	N0
TCGA-G9-7521-01	Primary Tumor	9.658	8.765	T3a	N1
TCGA-EJ-8469-01	Primary Tumor	9.652	8.507	T3a	N0
TCGA-V1-A9Z9-01	Primary Tumor	9.644	8.837	T2c	N0
TCGA-M7-A721-01	Primary Tumor	9.642	8.697	T2c
TCGA-V1-A9ZG-01	Primary Tumor	9.635	8.879	T2c	N0
TCGA-EJ-7784-01	Primary Tumor	9.634	8.752	T2c	N0
TCGA-M7-A723-01	Primary Tumor	9.633	9.023	T3b	N1
TCGA-V1-A9Z7-01	Primary Tumor	9.628	8.892	T3b	N0
TCGA-V1-A8X3-01	Primary Tumor	9.627	8.557	T2c	N0
TCGA-KK-A7AY-01	Primary Tumor	9.611	9.332	T2c	N0
TCGA-G9-6498-01	Primary Tumor	9.608	9.658	T3a
TCGA-TK-A8OK-01	Primary Tumor	9.608	8.446
TCGA-KK-A8IG-01	Primary Tumor	9.601	8.688	T3a	N0
TCGA-EJ-5522-01	Primary Tumor	9.601	8.133	T2c	N0
TCGA-XJ-A83H-01	Primary Tumor	9.6	8.788	T2c
TCGA-V1-A8MJ-01	Primary Tumor	9.596	9.007	T3a	N1
TCGA-EJ-7783-01	Primary Tumor	9.596	8.5	T3a	N0
TCGA-ZG-A9N3-01	Primary Tumor	9.595	9.812	T3b	N1
TCGA-HC-8216-01	Primary Tumor	9.583	8.418	T3a	N0
TCGA-FC-A6HD-01	Primary Tumor	9.582	9.977	T3a	N0
TCGA-VP-A87C-01	Primary Tumor	9.582	8.989	T2c	N0
TCGA-HC-7079-01	Primary Tumor	9.57	9.444	T3a	N0
TCGA-HC-7738-01	Primary Tumor	9.563	8.56	T2c
TCGA-V1-A8WW-01	Primary Tumor	9.562	9.203	T3b	N1
TCGA-EJ-5507-01	Primary Tumor	9.562	8.619	T3b	N1
TCGA-KK-A6E2-01	Primary Tumor	9.56	8.967	T2c	N0
TCGA-V1-A9ZK-01	Primary Tumor	9.557	8.646	T3b	N0
TCGA-VP-A87H-01	Primary Tumor	9.554	9.465	T3b	N0
TCGA-CH-5788-01	Primary Tumor	9.546	8.413	T3b	N1
TCGA-EJ-A6RA-01	Primary Tumor	9.535	9.321	T3b	N1
TCGA-ZG-A8QY-01	Primary Tumor	9.533	8.639	T3b	N1
TCGA-HC-8262-01	Primary Tumor	9.531	8.706	T2c	N0
TCGA-CH-5744-01	Primary Tumor	9.528	8.666	T2c	N0
TCGA-XK-AAIV-01	Primary Tumor	9.526	9.164	T3b	N1
TCGA-EJ-5511-01	Primary Tumor	9.517	8.743	T3a	N0
TCGA-G9-6378-01	Primary Tumor	9.514	8.763	T2c
TCGA-G9-6354-01	Primary Tumor	9.512	9.03	T2b
TCGA-ZG-A9LM-01	Primary Tumor	9.507	9.124	T3a	N1
TCGA-EJ-A65M-01	Primary Tumor	9.504	8.996	T2c	N0
TCGA-CH-5762-01	Primary Tumor	9.496	8.598	T3b	N0
TCGA-KK-A6E7-01	Primary Tumor	9.493	9.345	T3a	N1
TCGA-EJ-A8FN-01	Primary Tumor	9.49	8.776	T2c	N0
TCGA-J9-A8CP-01	Primary Tumor	9.483	8.835	T3a
TCGA-J4-A67N-01	Primary Tumor	9.482	9.521	T3a	N0
TCGA-VP-AA1N-01	Primary Tumor	9.479	9.201	T3a	N0
TCGA-G9-6338-01	Primary Tumor	9.474	8.84	T3a	N0
TCGA-HC-8213-01	Primary Tumor	9.472	8.387	T2c
TCGA-EJ-5530-01	Primary Tumor	9.471	8.543	T2c	N0
TCGA-EJ-5506-01	Primary Tumor	9.47	8.353	T3b	N1
TCGA-H9-A6BX-01	Primary Tumor	9.463	9.059	T2c
TCGA-2A-AAYU-01	Primary Tumor	9.458	8.571	T3a	N0
TCGA-CH-5740-01	Primary Tumor	9.457	8.629	T2c	N0
TCGA-CH-5772-01	Primary Tumor	9.456	8.113	T3a	N0
TCGA-CH-5743-01	Primary Tumor	9.455	8.792	T2c	N0
TCGA-J4-A67S-01	Primary Tumor	9.446	9.652	T3a	N0
TCGA-J4-AAU2-01	Primary Tumor	9.446	8.87	T2c	N0
TCGA-HC-7211-01	Primary Tumor	9.438	8.21	T2c	N0
TCGA-EJ-5514-01	Primary Tumor	9.438	8.123	T2c	N0
TCGA-HC-7817-01	Primary Tumor	9.434	8.968	T3b
TCGA-EJ-7218-01	Primary Tumor	9.428	9.007	T2c	N0
TCGA-HC-7080-01	Primary Tumor	9.427	9.031	T2a	N0
TCGA-KK-A59Y-01	Primary Tumor	9.422	9.476	T3a	N1
TCGA-FC-A66V-01	Primary Tumor	9.418	9.683	T3b	N0
TCGA-2A-A8W3-01	Primary Tumor	9.41	8.617	T3a	N0
TCGA-HC-A6HX-01	Primary Tumor	9.41	10.01	T2c	N0
TCGA-HC-A6AQ-01	Primary Tumor	9.406	9.603	T2c
TCGA-G9-6339-01	Primary Tumor	9.401	9.293	T3b	N0
TCGA-ZG-A9ND-01	Primary Tumor	9.388	8.538	T3a	N0
TCGA-EJ-7797-01	Primary Tumor	9.384	8.678	T2c	N0
TCGA-EJ-7325-01	Primary Tumor	9.374	9.934	T3b	N0
TCGA-EJ-5524-01	Primary Tumor	9.364	7.936	T3a	N0
TCGA-CH-5791-01	Primary Tumor	9.363	9.193	T3a	N0
TCGA-HC-7820-01	Primary Tumor	9.362	8.4	T2c
TCGA-HC-A6AL-01	Primary Tumor	9.36	9.636	T2c	N0
TCGA-EJ-7318-01	Primary Tumor	9.36	9.388	T3a
TCGA-G9-7509-01	Primary Tumor	9.359	8.471	T2c
TCGA-2A-AAYF-01	Primary Tumor	9.359	8.536	T3a
TCGA-QU-A6IL-01	Primary Tumor	9.356	9.86	T2c	N0
TCGA-HC-7212-01	Primary Tumor	9.338	8.423	T2a	N0
TCGA-G9-6361-01	Primary Tumor	9.333	8.988	T3a	N0
TCGA-KK-A8I7-01	Primary Tumor	9.328	9.049	T3b	N0
TCGA-CH-5741-01	Primary Tumor	9.326	8.658	T3b	N1
TCGA-V1-A9OQ-01	Primary Tumor	9.324	8.891	T3a
TCGA-HC-7736-01	Primary Tumor	9.323	8.582	T2c	N0
TCGA-G9-6342-01	Primary Tumor	9.317	9.141	T3a
TCGA-HC-8258-01	Primary Tumor	9.311	8.762	T2c	N0
TCGA-HC-A6AO-01	Primary Tumor	9.307	9.778	T2c
TCGA-G9-6333-01	Primary Tumor	9.307	8.813	T2c	N0
TCGA-H9-A6BY-01	Primary Tumor	9.307	9.766	T3a	N0
TCGA-ZG-A8QX-01	Primary Tumor	9.305	8.849	T2c	N0
TCGA-FC-A5OB-01	Primary Tumor	9.285	8.231	T3b	N0
TCGA-QU-A6IO-01	Primary Tumor	9.283	9.998	T2c	N0
TCGA-KK-A8IJ-01	Primary Tumor	9.273	8.631	T3b	N1
TCGA-G9-6379-01	Primary Tumor	9.267	10.01	T3b	N0
TCGA-EJ-AB20-01	Primary Tumor	9.266	9.15	T2c	N0
TCGA-H9-7775-01	Primary Tumor	9.266	8.556	T2c
TCGA-XK-AAK1-01	Primary Tumor	9.264	8.814	T2c	N0
TCGA-ZG-A9NI-01	Primary Tumor	9.255	9.568	T3b	N0
TCGA-J4-A67K-01	Primary Tumor	9.254	9.515	T2c
TCGA-KK-A6E5-01	Primary Tumor	9.246	8.908	T3b	N0
TCGA-EJ-5502-01	Primary Tumor	9.242	8.596	T2c	N0
TCGA-KK-A6E8-01	Primary Tumor	9.24	8.759	T2c	N0
TCGA-V1-A9Z8-01	Primary Tumor	9.236	9.36	T3b	N0
TCGA-QU-A6IM-01	Primary Tumor	9.224	10.16	T2a	N0
TCGA-EJ-5508-01	Primary Tumor	9.22	8.064	T3a	N0
TCGA-EJ-5518-01	Primary Tumor	9.213	8.798	T4	N0
TCGA-EJ-7782-01	Primary Tumor	9.211	8.748	T2c	N0
TCGA-EJ-7327-01	Primary Tumor	9.208	8.557	T3b	N0
TCGA-CH-5745-01	Primary Tumor	9.207	8.475	T3a	N0
TCGA-EJ-7331-01	Primary Tumor	9.204	8.181	T2c	N0
TCGA-J4-A67L-01	Primary Tumor	9.2	9.376	T3a	N0
TCGA-EJ-A6RC-01	Primary Tumor	9.195	8.936		N0
TCGA-HC-7749-01	Primary Tumor	9.194	8.607	T3a	N0
TCGA-CH-5768-01	Primary Tumor	9.18	8.47	T3a	N0
TCGA-EJ-7792-01	Primary Tumor	9.168	8.378	T2c	N0
TCGA-CH-5767-01	Primary Tumor	9.166	7.952	T2c	N0
TCGA-HC-7213-01	Primary Tumor	9.159	9.238	T3b	N0
TCGA-HC-7818-01	Primary Tumor	9.148	8.536	T2c	N0
TCGA-ZG-A9MC-01	Primary Tumor	9.144	9.556	T3b	N1
TCGA-CH-5763-01	Primary Tumor	9.131	7.899	T3a	N0
TCGA-M7-A722-01	Primary Tumor	9.12	9.552	T3a	N0
TCGA-V1-A9OH-01	Primary Tumor	9.114	8.918	T2b
TCGA-CH-5764-01	Primary Tumor	9.102	8.343	T3b	N0
TCGA-G9-6329-01	Primary Tumor	9.1	9.393	T2c
TCGA-G9-6332-01	Primary Tumor	9.086	8.995	T3a	N0
TCGA-J4-A67M-01	Primary Tumor	9.069	9.791	T3a	N0
TCGA-HC-A6AS-01	Primary Tumor	9.059	9.332	T2a	N0
TCGA-EJ-7321-01	Primary Tumor	9.058	8.651	T3a	N0
TCGA-ZG-A9L4-01	Primary Tumor	9.058	8.871	T3b	N0
TCGA-HC-7231-01	Primary Tumor	9.052	8.723	T2c
TCGA-VP-A87J-01	Primary Tumor	9.051	8.368	T3a	N1
TCGA-HC-7081-01	Primary Tumor	9.04	8.492	T3b
TCGA-J4-A67R-01	Primary Tumor	9.036	9.711	T2c	N0
TCGA-CH-5738-01	Primary Tumor	9.03	8.318	[Discrepancy]
TCGA-EJ-5497-01	Primary Tumor	9.03	8.054	T2c	N0
TCGA-J4-A67Q-01	Primary Tumor	9.016	9.819	T2c
TCGA-CH-5739-01	Primary Tumor	9.002	8.433	T3a	N0
TCGA-KK-A6E6-01	Primary Tumor	9.001	8.818	T3a	N0
TCGA-HC-7075-01	Primary Tumor	8.989	8.642	T2a
TCGA-EJ-AB27-01	Primary Tumor	8.985	8.8	T2c	N0
TCGA-EJ-5542-01	Primary Tumor	8.978	7.815	T3a	N0
TCGA-KK-A7B0-01	Primary Tumor	8.977	9.99	T3b	N0
TCGA-EJ-A65J-01	Primary Tumor	8.977	8.981	T3a	N0
TCGA-EJ-5527-01	Primary Tumor	8.975	7.994	T3a	N0
TCGA-EJ-5495-01	Primary Tumor	8.972	8.61	T3b	N1
TCGA-EJ-5525-01	Primary Tumor	8.971	8.608	T2c	N0
TCGA-EJ-7785-01	Primary Tumor	8.97	8.274	T3a	N0
TCGA-G9-6499-01	Primary Tumor	8.954	8.882	T3a	N0
TCGA-EJ-A65B-01	Primary Tumor	8.944	9.026	T3b	N0
TCGA-HC-7232-01	Primary Tumor	8.944	8.468	T3b
TCGA-J4-A67O-01	Primary Tumor	8.943	9.781	T2c	N0
TCGA-EJ-7791-01	Primary Tumor	8.94	8.712	T2c	N0
TCGA-G9-6366-01	Primary Tumor	8.933	8.322	T3b
TCGA-G9-6496-01	Primary Tumor	8.912	9.329	T2c	N0
TCGA-G9-6371-01	Primary Tumor	8.91	8.501	T2c
TCGA-CH-5789-01	Primary Tumor	8.903	8.024	T3a	N0
TCGA-HC-7742-01	Primary Tumor	8.898	9.054	T3a	N0
TCGA-EJ-5494-01	Primary Tumor	8.896	8.711	T3a	N0
TCGA-VN-A943-01	Primary Tumor	8.895	8.45	T2c	N0
TCGA-G9-6373-01	Primary Tumor	8.895	10.03	T3a
TCGA-EJ-7330-01	Primary Tumor	8.883	8.028	T3a	N0
TCGA-HC-A6AP-01	Primary Tumor	8.847	9.57	T2c
TCGA-EJ-7786-01	Primary Tumor	8.839	8.134	T2c	N0
TCGA-ZG-A9L2-01	Primary Tumor	8.82	8.932	T3b	N0
TCGA-HC-A6AN-01	Primary Tumor	8.812	9.644	T3a	N0
TCGA-VP-A87E-01	Primary Tumor	8.811	8.62	T2c	N0
TCGA-EJ-7781-01	Primary Tumor	8.809	8.132	T2c	N0
TCGA-KK-A7AW-01	Primary Tumor	8.802	9.757	T3a	N1
TCGA-HC-7737-01	Primary Tumor	8.801	8.519	T2c	N1
TCGA-HC-7750-01	Primary Tumor	8.794	8.62	T2c
TCGA-CH-5769-01	Primary Tumor	8.784	8.902	T3b	N0
TCGA-HC-7210-01	Primary Tumor	8.782	7.815	T2a	N0
TCGA-G9-6384-01	Primary Tumor	8.779	8.55	T3a	N0
TCGA-EJ-5532-01	Primary Tumor	8.775	8.275	T3a	N0
TCGA-CH-5794-01	Primary Tumor	8.76	8.842	T2b	N0
TCGA-G9-6356-01	Primary Tumor	8.734	8.929	T3b	N0
TCGA-G9-6367-01	Primary Tumor	8.729	8.676	T3a	N0
TCGA-HC-7748-01	Primary Tumor	8.723	8.218	T2a	N0
TCGA-CH-5792-01	Primary Tumor	8.71	9.182	T3a	N0
TCGA-EJ-7794-01	Primary Tumor	8.707	8.112	T2c	N0
TCGA-EJ-5516-01	Primary Tumor	8.706	7.794	T3a	N0
TCGA-EJ-5515-01	Primary Tumor	8.703	7.665	T3a	N0
TCGA-G9-7522-01	Primary Tumor	8.697	8.583	T2c	N0
TCGA-EJ-5504-01	Primary Tumor	8.69	8.128	T3a	N1
TCGA-G9-6385-01	Primary Tumor	8.675	8.883	T2c
TCGA-G9-7523-01	Primary Tumor	8.674	8.483	T3a	N0
TCGA-EJ-5503-01	Primary Tumor	8.673	8.804	T3a	N0
TCGA-G9-6365-01	Primary Tumor	8.669	8.712	T4	N0
TCGA-EJ-5512-01	Primary Tumor	8.668	8.131	T2c	N0
TCGA-EJ-5501-01	Primary Tumor	8.663	8.696	T3b	N0
TCGA-G9-6351-01	Primary Tumor	8.647	8.617	T2c
TCGA-EJ-5505-01	Primary Tumor	8.642	7.982	T2c	N0
TCGA-G9-6377-01	Primary Tumor	8.634	8.764	T2c	N0
TCGA-EJ-5496-01	Primary Tumor	8.63	8.35	T2c	N0
TCGA-G9-6370-01	Primary Tumor	8.623	8.736	T3b	N0
TCGA-HC-7077-01	Primary Tumor	8.622	8.797	T3a
TCGA-CH-5771-01	Primary Tumor	8.589	8.96	T2c	N0
TCGA-KK-A6E4-01	Primary Tumor	8.576	9.622	T2b	N0
TCGA-HI-7169-01	Primary Tumor	8.575	9.326	T3a	N0
TCGA-EJ-7115-01	Primary Tumor	8.575	8.856	T3a	N0
TCGA-G9-7510-01	Primary Tumor	8.567	8.821	T3a	N0
TCGA-ZG-A9L1-01	Primary Tumor	8.564	8.925	T3b	N1
TCGA-G9-7519-01	Primary Tumor	8.563	8.651	T2c
TCGA-G9-6348-01	Primary Tumor	8.562	8.558	T2c	N0
TCGA-KK-A6E3-01	Primary Tumor	8.557	9.49	T2c	N0
TCGA-EJ-5517-01	Primary Tumor	8.533	7.998	T2c	N0
TCGA-HC-7233-01	Primary Tumor	8.53	8.536	T2a	N0
TCGA-G9-6364-01	Primary Tumor	8.5	7.86	T3a	N0
TCGA-CH-5737-01	Primary Tumor	8.497	8.374	T2c	N0
TCGA-EJ-7123-01	Primary Tumor	8.487	8.376	T2c	N0
TCGA-G9-6494-01	Primary Tumor	8.484	8.5	T4	N0
TCGA-HC-7209-01	Primary Tumor	8.465	8.813	T2c	N0
TCGA-EJ-7793-01	Primary Tumor	8.456	8.53	T2c
TCGA-HI-7170-01	Primary Tumor	8.405	8.851	T2c	N0
TCGA-HC-7744-01	Primary Tumor	8.393	8.858	T3b	N0
TCGA-EJ-7125-01	Primary Tumor	8.372	8.254	T2c	N0
TCGA-EJ-5531-01	Primary Tumor	8.367	8.755	T3a	N0
TCGA-G9-6336-01	Primary Tumor	8.304	9.069		N0
TCGA-HC-7747-01	Primary Tumor	8.275	8.76	T2c	N0
TCGA-EJ-7317-01	Primary Tumor	8.274	8.539	T2c	N0
TCGA-EJ-5498-01	Primary Tumor	8.247	8.045	T2c	N0
TCGA-EJ-7315-01	Primary Tumor	8.245	9.025	T3a	N0
TCGA-HC-7740-01	Primary Tumor	8.243	8.377	T2c	N0
TCGA-EJ-7314-01	Primary Tumor	8.238	8.419	T3b	N0
TCGA-G9-7525-01	Primary Tumor	8.221	9.3	T2c	N0
TCGA-G9-6343-01	Primary Tumor	8.218	8.793	T2c
TCGA-G9-6347-01	Primary Tumor	8.195	9.998	T2c
TCGA-G9-6369-01	Primary Tumor	8.192	8.971	T2c	N0
TCGA-G9-6353-01	Primary Tumor	8.183	8.488	T3a
TCGA-EJ-5499-01	Primary Tumor	8.155	8.738	T3a	N0
TCGA-EJ-5510-01	Primary Tumor	8.11	8.616	T2c	N0
TCGA-EJ-5521-01	Primary Tumor	7.926	9.38	T3a	N0
TCGA-EJ-5509-01	Primary Tumor	7.896	8.525	T2c	N0
