# Supplementary material for: Implications of the KHDC4-TRAF2 axis in the context of prostate cancer prognosis
Source: Aging (Albany NY). 2025 Jun 23;17(6):1544–70. doi: 10.18632/aging.206273 (PMC12245195; doi:10.18632/aging.206273)
Supplement: Supplementary Table 5 [file aging-17-206273-s006.xlsx]

## Sheet: Supplementary Table 5
Supplementary Table 5. Related expression of KHDC4 and TRAF2 in GSE21032, GSE35988, GSE6919 datasets.
GSE21032
Gene Symbol	ID	GB_ACC	ID_REF	GSM527858	GSM527859	GSM527860	GSM527861	GSM527862	GSM527863	GSM527864	GSM527865	GSM527866	GSM527867	GSM527868	GSM527869	GSM527870	GSM527871	GSM527872	GSM527873	GSM527874	GSM527875	GSM527876	GSM527877	GSM527878	GSM527879	GSM527880	GSM527881	GSM527882	GSM527883	GSM527884	GSM527885	GSM527886	GSM527887	GSM527888	GSM527889	GSM527890	GSM527891	GSM527892	GSM527893	GSM527894	GSM527895	GSM527896	GSM527897	GSM527898	GSM527899	GSM527900	GSM527901	GSM527902	GSM527903
KHDC4	12909	NM_014949	12909	350.788	369.002	346.193	428.605	338.545	215.948	340.48	328.128	358.414	347.452	309.769	316.648	365.923	283.19	285.686	329.737	271.587	275.344	323.452	301.598	238.077	355.023	306.709	362.983	225.865	250.2	262.136	395.161	328.604	291.431	270.492	445.285	376.692	192.673	414.226	480.268	260.04	455.742	299.292	448.247	332.665	370.273	314.787	301.611	234.023	468.23
TRAF2	16192	NM_021138	16192	259.418	267.255	290.044	261.45	239.711	293.79	214.868	220.654	267.435	255.052	257.664	239.453	173.657	321.419	245.332	235.644	296.993	263.978	263.763	263.979	258.633	203.088	265.469	252.612	325.494	300.272	296.089	362.603	236.583	260.14	266.442	234.429	310.937	263.766	249.39	303.718	362.964	232.472	267.504	246.001	235.367	200.888	227.087	239.036	236.906	289.84
GSE35988
Gene Symbol	ID_REF	GSM878750	GSM878751	GSM878752	GSM878753	GSM878754	GSM878755	GSM878756	GSM878757	GSM878758	GSM878759	GSM878760	GSM878761	GSM878762	GSM878763	GSM878764	GSM878765	GSM878766	GSM878767	GSM878768	GSM878769	GSM878770	GSM878771	GSM878772	GSM878773	GSM878774	GSM878775	GSM878776	GSM878777	GSM878778	GSM878779	GSM878780	GSM878781	GSM878782	GSM878783	GSM878784	GSM878785	GSM878786	GSM878787	GSM878788	GSM878789	GSM878790	GSM878791	GSM878792	GSM878793	GSM878794	GSM878795	GSM878796	GSM878797
KHDC4	A_24_P350744	-1.00736	-0.550949	-0.565974	-0.472485	-0.293562	-0.256208	-1.32212	-1.25857	-1.13325	-1.08919	-0.638869	-0.293717	-0.0663503	-1.05185	-1.47674	-0.582528	-0.609056	-0.773497	-0.613124	-0.754951	-0.679396	-0.245261	-0.179217	-0.55433	-0.391521	-0.293819	-1.02926	-0.456566	-0.802931	-0.254819	-0.263179	0.0672788	-0.710044	0.0564127	-0.835064	-0.537191	-0.0246472	-0.594574	-0.645652	-0.207479	0.000307413	-0.991076	-0.663837	-0.896008	-0.674647	-0.416857	-1.01028	-1.04068
TRAF2	A_23_P169331	-0.286192	-1.00409	-0.780193	-0.753929	-0.826659	-0.783249	-1.05599	-0.26035	-0.590152	-0.944554	-0.589724	-0.264437	-0.58407	-0.470475	-0.767099	-0.251112	-0.460121	-0.690295	-0.653067	-0.793653	-0.661366	-0.353176	-0.409295	-0.37453	-0.847522	-0.577303	-0.99294	-1.0516	-0.689818	-0.751648	-0.534659	-1.03571	-1.21589	-0.289922	-0.573131	-0.696611	-0.464533	-0.113558	-0.694731	-0.214622	-0.903655	-0.798247	-0.913319	-0.972527	-0.526164	-0.696802	-0.764825	-0.930609
GSE6919
Gene Symbol	ID	ID_REF	GSM152804	GSM152805	GSM152806	GSM152807	GSM152808	GSM152809	GSM152810	GSM152811	GSM152812	GSM152813	GSM152814	GSM152815	GSM152816	GSM152817	GSM152818	GSM152819	GSM152820	GSM152821	GSM152856	GSM152857	GSM152858	GSM152859	GSM152860	GSM152861	GSM152862	GSM152863	GSM152864	GSM152865	GSM152866	GSM152867	GSM152868	GSM152869	GSM152870	GSM152871	GSM152872	GSM152873	GSM152874	GSM152875	GSM152876	GSM152877	GSM152878	GSM152879	GSM152880	GSM152931	GSM152932	GSM152933	GSM152934
KIAA0907	33885_at	33885_at	245.1	312.5	250.3	487	263.7	293.5	228.8	291.7	228.9	322.7	235.6	323.6	322	175.1	278.2	229.8	179.4	215.1	155.6	255.4	356.7	221.9	261.9	514	391.1	350.3	539.4	412.1	207.9	400.7	289.3	516.1	189.3	314.5	225	279.3	248.6	233.4	229.1	279.8	257.7	171.9	204.4	328.6	317.2	184.3	244.6
TRAF2	1746_s_at	1746_s_at	242.1	67.5	195.5	181.3	51	139.8	97.6	48.1	209.4	81.4	149.2	106.2	75.7	48.7	88	54.7	64.5	211.5	157.4	190.3	225.7	209.3	307.2	163.2	301.3	248.8	216.7	265.4	374.6	74	301.2	286.8	207.3	289.2	237.5	96.3	432.1	254.7	188.9	232.8	206.7	146.2	88.2	128.4	121.3	88	59.5
[truncated: 133 more columns]
