# Supplementary material for: Implications of the KHDC4-TRAF2 axis in the context of prostate cancer prognosis
Source: Aging (Albany NY). 2025 Jun 23;17(6):1544–70. doi: 10.18632/aging.206273 (PMC12245195; doi:10.18632/aging.206273)
Supplement: Supplementary Table 7 [file aging-17-206273-s008.xlsx]

## Sheet: Supplementary Table 7
Supplementary Table 7. Molecular correlation of KHDC and TRAF2 in TCGA-PRAD datasets.
KHDC4 positive correlated genes				KHDC4 negative correlated genes				TRAF2 positive correlated genes				TRAF2 negative correlated genes
Names	total	elements		Names	total	elements		Names	total	elements		Names	total	elements
Cell 2015+Firehose Legacy+PanCancer Atlas	1998	FAM219A		Cell 2015+Firehose Legacy+PanCancer Atlas	425	PTGER3		Cell 2015+Firehose Legacy+PanCancer Atlas	3117	DPM2		Cell 2015+Firehose Legacy+PanCancer Atlas	2411	CLMP
		C17ORF67				KCNMA1				RPS11				FSTL1
		TUBD1				CCDC25				RPS17				HPSE2
		CCDC116				PRCP				KRTCAP2				SLMAP
		GNL3				PTN				TMEM216				CIPC
		GAPDHS				LPP				CCDC116				DLG1
		ATF6B				NBAS				NDUFS6				KCNMA1
		INPP5E				MMGT1				TUT1				GSKIP
		TESMIN				DHCR24				C6ORF226				VPS33A
		ANKRD36B				ESYT1				ERAL1				CMTR2
		PMPCA				CHRDL1				NAPRT				CTAGE10P
		PBX4				LDB3				MATCAP1				UTP20
		MATCAP1				HSPB8				PBX4				MMGT1
		H3C12				SQOR				NCF4				H2AZ2
		CLK4				MBNL2				RPS18				RNF38
		ZNF799				ATP6V0D1				TMSB10				KLHL2
		U2SURP				MITF				RAB1B				IGF1
		ZNF785				CSTF1				UQCR11				C5ORF22
		CUBN				RBFOX3				UBAC1				G3BP1
		MTHFD2L				TM9SF1				CHRNA10				LMAN1
		BRIX1				UGGT1				TOP1MT				NUP155
		TEKTIP1				SLC2A5				RPL19				LCORL
		SNORD1C				TMX4				XAB2				CYP39A1
		GAS5				KCNK6				DTNBP1				POLK
		MSL1				SYNPO2				COPRS				UBE2G1
		OR2B6				RNF185				TRIM74				CHD8
		CHRNA10				EPDR1				ZNF446				SIDT1
		LINC00235				ZFYVE1				TMEM42				SCAF8
		DAZAP1				NFIA				HROB				ATP9B
		ZBTB12				EXT2				RABGEF1P1				EP300
		LYG1				DOLK				CCDC28B				CCNI
		CHORDC1				LAMP1				STK16				GNAL
		BTN2A1				PRKCB				LYAR				CRNKL1
		NSMCE4A				CA14				CAPS				MITF
		DDX5				TMEM127				PIR				KLHL14
		TRIM74				MAP3K20				LONP1				KIRREL1
		SLC26A1				OGDH				RRP7A				MON1B
		DHX35				SLC35F6				RPL7A				TAF9B
		ZSCAN9				AARS1				TMEM184A				CACNA2D1
		ZNF131				CLN5				SLC25A14				FNBP1L
		ANKRD13B				CES2				TP53AIP1				SH3BP4
		RPA4				ASB8				MAPKAPK2				SLC33A1
		ANAPC4				ANO5				UFSP1				TRIM33
		IZUMO4				DCBLD2				LHB				USP47
		RABGEF1P1				RBBP9				STK25				NDUFS1
		CCDC28B				SCUBE3				CDC25B				G2E3
		EHBP1-AS1				SYT10				CYP2D6				FAT4
		LYAR				CD38				NOXO1				NWD1
		TBC1D3H				ZBTB38				ATP5MG				TMCC3
		GRM2				FYCO1				PHLDB3				TMX4
		ZNF181				KCNA2				RELT				MIER1
		HERC2P2				RBPJ				ABCD4				CHD9
		PTCD3				DSTN				LMNB2				PAPOLA
		TMEM184A				MYO1C				ANAPC1P2				MSH3
		SLC25A14				WDR1				VKORC1				RNF14
		ACTG1P4				EMP2				LRGUK				RAB3IP
		ZNF182				EMC1				FOXK2				MINDY1
		SPPL2B				SEMA3A				EED				SLC15A2
		FAM209A				ADH5				PDCD5				MMS22L
		STK25				SORT1				DGUOK				THRAP3
		RIOK1				PCDH7				RBM17				SPECC1L
		CDC25B				IGSF1				NUDT1				INIP
		CACTIN				PARVA				ZNF212				GSTCD
		CYP2D6				MRAP2				ZNF83				RNF185
		PCGF3				ACOX1				SUPT4H1				LRRC37A4P
		NOXO1				MBTPS1				EOLA2				OSBPL8
		NASP				PRORP				CAVIN3				PIKFYVE
		CDK20				RNF180				WDR45				IPO9
		CDK11A				DHDDS				NEIL1				MED13L
		ACSBG2				SLC9A9				ZNG1F				EVC
		LMNB2				TMEM59				RBM10				HOXA13
		ANAPC1P2				EDNRA				SIRT6				NFIA
		SRRM2-AS1				STIM1				DNAH17				TEAD1
		CCDC66				PIGV				EXOC3				TCEANC2
		LRGUK				B4GALT1				RMND5B				CXADR
		NUTM2G				CDC42EP3				SSU72				RPS6KA5
		EED				MFN2				CFAP157				ATG2B
		PDCD5				MAPRE1				EXOSC7				RHOT1
		TOP1P2				BACE2				SMUG1				ELOVL5
		SLC6A10P				ACTC1				ZBTB48				EPS8
		C1QTNF3				ACP2				BUD31				ARHGAP21
		RBM17				DYNC1H1				APOE				ACTR8
		ZNF212				FLNC				C10ORF95				TAOK3
		ZNF83				GNG12				PSMG4				HERC2
		IPW				CAVIN1				ING5				ZNF510
		TAF5				CHRM1				F8A1				LPAR4
		SCX				COLGALT2				HDAC7				SLK
		CARNS1				GLG1				HIKESHI				LUZP1
		SPDYE7P				NOMO1				DUS3L				CAND1
		NUP42				RHOA				EIF1				CLCC1
		ZNF529				HLF				NTHL1				ACSL3
		NIBAN3				PJA2				TMPO-AS1				UTRN
		NEIL1				NAGA				ZNF232				USP6NL
		CPLX3				NIBAN1				GPN2				BAZ1B
		DCAF4L1				MYORG				TRAPPC9				ROCK2
		RBM10				SRD5A2				CDIPT				SDAD1
		ZNG1F				ADRA1A				TOR3A				ANXA3
		SPIRE2				ESRRG				PMF1				PPP1R15B
		C14ORF39				AP3B1				ENTPD8				SLC25A46
		MKNK1				DNAJC3				C8G				PHF20
		DNAH17				DYM				SYT12				SEC14L5
		TRA2B				SSR3				PMM1				MAP3K20
		ARHGAP39				RSPO2				LCMT1				ZNF702P
		MGAT4B				ZCCHC24				VAX2				ATL2
		ZNF345				MAGT1				TONSL				SLC8A1
		KNTC1				RIMBP3				FOXD4L1				MANEA
		MIB2				MT1G				INTS1				ACBD3
		MFSD8				COG2				SLC24A5				VGLL3
		EXOSC2				GOT2				RNF166				DCP1A
		CCDC57				SH3BGRL				CAMTA1				PRDM2
		FGF17				PPARGC1A				TJAP1				SEL1L3
		TIAL1				RPE65				PGGHG				TMCO3
		CFAP157				SPCS3				MYO15B				KPNA3
		ZBTB48				EYA1				COL18A1				PDCD4
		INE1				AOC3				TBC1D17				CEP350
		KLF3-AS1				CSRP1				COX8A				CLN5
		NR2E3				SMPD1				BIRC7				RAPGEF6
		GOLGA6L10				GANAB				SF3B6				ALDH3A2
		ING5				FA2H				CDCA4				ANO5
		SRSF6				EFCAB14				FUS				FITM2
		TRIM41				FAM114A2				FBXO24				BCLAF1
		HDAC7				GALNT17				POLR2J4				SCUBE3
		PLEKHG4				INKA2				MTMR14				MTRR
		ZNF598				FRMD6				DNAL4				BBS7
		PPP2R3B				GLB1L2				POLR2J				RTF1
		HIKESHI				PPP1R2B				UQCRC1				CD38
		MAPK12				EDN3				ZNHIT2				CCNY
		DUS3L				SPON1				TFR2				GTF3C3
		C15ORF62				TIMM10B				BORCS8-MEF2B				GUCY1A1
		N4BP2L2				RIMS3				LSM4				UFM1
		TMPO-AS1				ASTN2				PRR22				USP14
		DLEU2L				SRBD1				MRPL34				BLTP3B
		LINC01011				LMOD1				POMT1				FBXO11
		C17ORF75				PGM1				HLA-J				FRS2
		LLGL2				CPD				MTX1				CDK8
		ZSCAN16				TMEM35A				C21ORF58				EMC1
		OTUD3				MAP1LC3B				ARL16				PPP1R3D
		C8G				GM2A				DDX49				LCOR
		SETDB1				PDK2				OGFOD2				FPGT
		ENOSF1				UBXN10				MAN1B1-DT				FRRS1
		FBXL19-AS1				PLIN3				NME1-NME2				POLR2B
		TONSL				ARSB				NAA80				OPHN1
		FOXD4L1				MCFD2				UPF3A				ATAD1
		TMEM120B				SH3BGRL2				RHBDF1				ADH5
		SLC24A5				MYH11				LAGE3				UBR3
		SRSF11				ALDH1B1				DOHH				NOP9
		ZNF75A				GNS				CROCCP3				HYOU1
		HESX1				IFNAR1				CACNB1				GCC2
		TJAP1				KIAA0319L				MED27				OTUD4
		PGGHG				PCYOX1				EML3				SORT1
		MYO15B				CAP1				PI4KAP1				MFSD11
		ZNF239				SLC7A4				FERMT3				FAM98B
		MAFK				MAP1A				ABHD12				YWHAQ
		MYADML2				CTNNB1				PILRA				RFX3
		FAM76B				ANO10				PEX16				PPM1K
		ZNF284				RNF150				HABP4				CHMP1B
		ZNF605				PRDM6				COL7A1				YME1L1
		CHFR				HK1				CAPN12				CBLL1
		MPP4				HEXB				NANOS3				MAP3K13
		OTUD6B				ACO1				NHERF4				EIF1AX
		CDCA4				AP2B1				FANCC				GCLM
		TMEM151B				GCNT2				MUTYH				PPM1A
		ZNF534				PGM5P2				C8ORF44				CPEB3
		FUS				ARRB1				CMTM3				STARD13
		DNMT3B				SUMF2				HGH1				MMP16
		POLR2J4				TMED5				RP9				ARL13B
		SDHAP2				CHMP3				TMEM11				SCP2
		TASP1				FMOD				C20ORF204				SON
		EDRF1				JPH4				FAM234A				ABHD2
		SLC13A4				KCNAB1				ARAP1				SNX19
		POLG				TNS1				UQCRHL				PIK3CB
		POGZ				PDE4D				RPUSD3				UBXN4
		LUC7L2				NFATC3				SPACA6				CDS1
		BORCS8-MEF2B				TNFRSF10C				CENPX				PPP1R9A
		GUCA1B				ATG13				COMMD5				ERLIN2
		EFHC1				KY				LTBR				ATP11C
		PRR22				JCAD				LOC401052				PRORP
		IDO2				MFAP3L				NOP58				ZNF41
		C21ORF58				COG8				SLC39A5				XRN2
		ZSCAN32				MPDU1				PRR5				RSRC1
		OGFOD2				ELP3				FAM86FP				DHFR2
		ARL16				ADRA1D				C19ORF73				HYCC1
		PDPR2P				PPT1				REM2				ABRAXAS2
		IRF3				GLCE				DNHD1				IPP
		LCDR				PIGK				KISS1R				SEC23IP
		UPF3A				MFSD1				NADSYN1				CNOT1
		SEPTIN4				SLC6A14				PTGER1				SNX6
		UQCC1				LINC00908				RGS14				DDX18
		SENP7				CPPED1				ACTR5				NIPBL
		MIOX				RDH11				IL18BP				CEP120
		ANKRD49				LIX1				YIPF2				PTENP1
		CROCCP3				PCYT1B				OSGEP				POTEG
		PSMC3IP				ZBTB4				ETV2				RICTOR
		PPEF2				POU2F2				TTTY14				SPTBN1
		CACNB1				PIGT				SMAD5-AS1				EXOC2
		ATAD3B				AMIGO1				LPIN3				CDC42EP3
		OFD1				FUT10				RPL4				SRP72
		PI4KAP1				AGA				PRPF3				ZNF24
		HES7				GALNT4				E4F1				ZZEF1
		SLC22A14				CRTAP				RPS21				RAD18
		APRG1				KIF3B				RBM6				RANBP6
		POU6F1				ZMAT3				CYSTM1				ATR
		PILRA				ANGPT1				NRF1				SNX25
		C9ORF163				MYOCD				MRPS24				MAPRE1
		COL7A1				GALNT10				KLKB1				TRIP12
		TP73-AS1				ANGPTL1				UNC5CL				SMAD9
		NHERF4				TCTN3				PRDM12				PCDH18
		DHX16				SEL1L				ARMH1				LRRK2
		LEMD2				WFS1				IFI27				MBD5
		HPS4				ZNF429				ENTR1				MYO5C
		FANCC				YWHAB				HDAC3				APPBP2
		PABIR2				ATL1				RPL13AP3				KDM5A
		C8ORF44				B3GALT2				PIGL				SUV39H2
		ARL6IP6				RWDD2B				MRPL57				ABI2
		GPATCH2				ARHGAP20				DNAJC30				TMEM87B
		DIDO1				C6ORF89				POLD2				USP32
		C20ORF204				PLBD2				CEP131				NUDT12
		ZNF320				DPT				ZMIZ1-AS1				LIN52
		CCDC18				SREK1IP1				GGN				SLC25A21
		CEL				CGNL1				RTEL1				ATF1
		NGDN				VPS26C				CHMP6				DYNC1H1
		UQCRHL				EXOC4				PDAP1				AHCYL2
		MARK3				EIF5B				CD151				TMEM33
		SPACA6				AAR2				NDUFA13				HINT3
		POM121L10P				PCDH1				POLRMT				ARIH1
		CBARP				ANO4				ARFRP1				ATF7
		BRD8				CD59				MRPL41				GNG12
		HEPHL1				DUSP3				NENF				IL6R
		ANKLE2				PTPRN2				SCAMP3				UFL1
		SLC9A3				PSAP				MTG1				CDC14C
		FAM218A				ATP1A2				FAM174C				MOB4
		NKTR				HERPUD1				ATP6AP1L				CRPPA
		NOP58				METTL9				FAU				SLC35A5
		SLC39A5				KIAA0513				CARD9				GLG1
		RBM44				AMFR				SLC34A3				NBR1
		REM2				MAPK1				DNAJC9				MIS18BP1
		DNHD1				PROK1				ZNF137P				KIF2A
		PTPN2				G3BP2				FBXO46				EPHA4
		GIPR				KCNS2				NOXA1				OCRL
		NFYA				SLC2A12				CELF5				L2HGDH
		AHI1				PYGB				MRTO4				UBXN7
		GORAB				CHTF8				NDUFB8				PLA2R1
		NADSYN1				NAGLU				SAMD10				ULBP3
		ACTR5				CYP20A1				SGF29				CNOT6
		SCARNA12				CD99L2				ENTREP3				ZBTB20
		LINC00938				TPP1				GJA9				SELENOP
		CDH24				ICMT				NDUFAF8				AGGF1
		LPIN3				LOC644936				PTGES2-AS1				PRRG1
		PDCD6P1				LRCH2				TRIM45				WASHC5
		SHFL				CYB5B				OSER1				HLF
		GGA1				MT1L				MYCBPAP				PJA2
		SPDYE5				TMED8				VWCE				LZTFL1
		DLEC1				ARHGAP1				ZNF419				GMFB
		E4F1				MYLK				TBC1D3B				HDHD2
		LOC730668				GPR161				UPK3B				SNORD116-4
		PRPF3				YIPF1				RER1				TCF4
		ZNF7				LARGE1				PMVK				GABRQ
		RBM6				TTC39A				KIAA0930				OSBP
		PLXNB3				STX12				RNF7				NBPF3
		TTC41P				PLCL1				UCN2				PDIA3P1
		NRF1				MUL1				SNRPC				ALDH1L2
		SULT1A2				NEO1				KCTD13				FRYL
		ACAD11				PLA2G15				FBF1				SRD5A2
		KLKB1				CALU				IRF7				UTP14C
		UNC5CL				NAAA				PELI3				ADRA1A
		ARMH1				CCPG1				LIMD2				LONRF2
		STRC				CREG1				WFIKKN1				SPG11
		GDF9				CHRNA4				LRP5L				AP3B1
		MITD1				SYS1				SH2B1				AHCYL1
		TRAF2				FCF1				ACAP3				KIAA0586
		PIGL				CYP27A1				NUP85				STON1
		SNHG9				PAFAH2				RFNG				AHNAK
		UIMC1				ZNRF3				RAB20				UBE2W
		ZNF667				AGL				NKX2-8				FOCAD
		PRPF39				TENM3				SCARNA2				NDNF
		GABBR1				TMEM181				PRRT1				HEATR5B
		DZANK1				C3ORF70				ZNF414				PBX1
		BMS1P2				ARL6IP5				ZBTB8OS				MTR
		JPX				AP1B1				TNNT2				CBX6
		NPPA				PHACTR2				GPS1				ASH1L
		KIN				OS9				RPS29				PPP1R12A
		CEP131				PDE5A				EMC9				CHMP2B
		DUS4L				VPS18				THOC7				LUZP6
		ZFP41				NECAB1				NAA60				TPMT
		ZMIZ1-AS1				PLPP6				LGALS4				PWAR5
		CARD14				RBM47				TALDO1				WAPL
		RTEL1				BCL2L1				DAGLB				NFE2L2
		H2BC18				SLC30A1				HCFC1R1				EML5
		ZNF738				TMBIM6				AGER				UBQLN2
		AHRR				CPNE6				FAM41C				ZNF275
		RALGPS1				NFE2L1				ILF3-DT				MEGF10
		VMP1				TGOLN2				ATP5PO				KLF4
		POLRMT				PIGS				CLK3				KLHL9
		MFSD14CP				MBTPS2				TPGS1				SKAP2
		SLC17A9				C2				UQCC5				OPA1
		PHF21B				TSPYL1				FIS1				RPS6KA6
		PLA2G6				EPM2A				TCFL5				MOB1B
		TTC13				IRAG1				PPCDC				SH3D19
		GUSBP1				EXTL3				ERMARD				YIPF6
		BASP1-AS1				PDZRN4				ZNF524				PROX1
		ATP6AP1L				VAMP3				SAFB2				GPBP1L1
		CELSR3				FUCA1				VPS16				PPM1H
		SLC34A3				SLC2A4				FOXRED1				KCNJ6
		DNAJC9				ATP2B4				CEP164				PPARGC1A
		H2AC21				PROM1				NEURL3				FMN1
		FBXO46				FLRT2				TOR2A				ASXL2
		ZNF137P				INMT				E2F4				RPE65
		BOD1				FAT3				TTC28-AS1				ARHGAP42
		NOXA1				TENT5B				FAM86HP				NCOA3
		AFG3L1P				PIP4K2C				TRAIP				SPCS3
		KLKP1				WSCD2				CHCHD5				MIA2
		NFRKB				XBP1				NUDT22				MTMR6
		FANCA				SSR1				TAF1D				ENTPD7
		DDX39A				ACP3				GPX4				SEC63
		PHYKPL				MTMR2				RTL8C				SLC35F1
		ZGRF1				PGR				CCDC85B				TOR1AIP1
		CRYBB3				TMED10				DVL1				SYTL4
		PTGES2-AS1				SRPX				PCED1A				AKIRIN1
		TRIM45				APOBEC3C				PEF1				ALDH6A1
		MYCBPAP				LGI3				DGKQ				RDX
		GNRH1				SEC62				PPDPF				VRK2
		FOXD4L6				NKAPL				ZFAS1				ZNF568
		ZNF419				AQP5				MCM5				TMEM170A
		TBC1D3B				TSPAN18				PPIEL				TNKS2
		GTF3C5				IPO11				RPL39				ERMAP
		ZNF384				ITFG1				IL15RA				TTC3
		CFAP44				VCL				DICER1-AS1				DIXDC1
		TAFAZZIN				ZNF185				KCNK7				VTI1A
		ABCC2				DIPK1A				COMTD1				GANAB
		PFN1P2				ZNF106				MUC20				CHAMP1
		CSPP1				CDC42EP4				RABAC1				CADPS2
		ZMYM5				STS				DNAJC4				ZNF354C
		ZNF586				PSMD1				CDK16				SMG8
		NAIP				CCDC69				GEMIN6				FRMPD4
		LRRC56				ACTG2				HRAS				FAM114A2
		KCTD13				MAN2B2				LINC-PINT				SLC2A10
		CFAP43				GINM1				RABL6				PAQR3
		FBF1				GDE1				MEF2B				ANKRD26
		IRF7				CHP1				UQCRQ				NCAPD3
		FAM193A				PDIA6				PLAC8L1				TMED7
		MEMO1				PTGFRN				PHPT1				PPP1R2B
		TBC1D8				PBXIP1				CD72				BRCC3
		NAPB				GUCD1				KAT5				TRAM2
		WFIKKN1				LAMP2				ERH				KCND3
		LRP5L				CRK				SDR39U1				PAWR
		SH2B1				SSPN				XRCC1				MTMR12
		ACAP3				SETD7				PARVB				PREX2
		LINC00240				KCNB1				LINC00896				ITGB1
		HSFY2				TANGO6				ELL				LDLR
		RFNG				BNIP3L				SCARNA16				ASTN2
		NUP85				MESD				GOLGA6L9				RBM26
		MST1P2				ABTB3				TUFM				PI15
		PPOX				NEXMIF				MAN2C1				FAM177A1
		NSMF				STAC				NSUN5				DSTYK
		SCARNA2				ZFHX3				SF3B5				BRINP3
		C1ORF35				FZD3				SNHG32				TAB2
		HASPIN				CCBE1				ABHD16B				DDI2
		GABPB1-AS1				CHURC1				SPDYA				DNAJC16
		RAD54B				PGM5				ASIC3				SNX13
		C1ORF174				EYA4				DECR2				TANC2
		MIR17HG				GPX3				YJEFN3				RAB9B
		TNNT2				RRAGD				TOMM22				CPD
		DGCR5				MASP1				MUS81				DLGAP1
		JRK				ST13				UNKL				KLHL28
		CENATAC				LPCAT3				C1ORF162				GMCL2
		ZNF177				SAE1P1				POP4				FBXL20
		LINC02591				LRRC28				ZNF839				LRBA
		POM121L9P				ARPIN				OIP5				FAM120A
		SPDL1				IGF2R				TMEM132A				ZNF827
		LOC728989				UST				VWA3A				SYDE2
		CBX1				BTD				RUVBL2				EPHA7
		LGALS4				CALD1				MCAT				SVIP
		USH2A				SIAE				WNT10B				EIF2S1
		AURKAP1				YIPF5				RPLP2				SPAG9
		SLC25A34				RPN2				BAIAP2L2				C3ORF38
		ARR3				EXOSC6				TRAPPC6A				JAK2
		AIRIM				FZD1				SPNS1				SLC39A9
		REXO1				ATP6V1D				SPDYE8				TSHZ1
		AGER				GYG1				RPL27				RAB5A
		PLEKHM1P1				RNF13				EPN1				PLEKHM3
		EME2				PYGM				CEMP1				LRP1B
		FAM41C				TIMP4				LIN7B				GPATCH11
		CLK3				DCTN5				BRICD5				HBP1
		NPIPB5				POU2F1				SLC23A3				MCFD2
		FAM157A				PSEN1				BGN				XPO4
		KCNV2				GALNS				PJVK				EPS15
		DNMT3A				AHNAK2				RAVER1				XIAP
		ERMARD				TMLHE				TSTD1				SH3BGRL2
		SLC7A5P2				SPRYD3				LINC01590				BDP1
		ORMDL1				SCN2B				SLC11A1				GNS
		INCA1				KPNA6				SH3GL1				MKLN1
		SAFB2				GLB1				EIF3H				IFNAR1
		LINC00174				ATCAY				SLC25A39				ATP6V0A2
		USP35				SERPINA3				FHIP1B				KIAA0319L
		SGK2				AMOT				PSRC1				PEX26
		FAM72D				TBC1D9				MRPL37				NF1
		CEP164				TCN2				PIERCE1				PPFIBP1
		EXOSC3				GBA1				SMIM1				ARFGEF2
		AGAP4				SYNM				FARS2				TEX2
		ZNF740				CALM1				TRIP10				ZNF561
		CHTF18				ALG1				TMEM205				MAP4K3
		PPP1R32				CCDC178				TESK1				CTNNB1
		TTC28-AS1				NDP				TMEM134				ATP6V1A
		FAM86HP				FLNA				FSD1				TMEM185B
		LINC01000				FKBP9P1				TSEN54				ANKRD17
		TRAIP				CES1				ZNF3				TRIM56
		MEX3D				PIPOX				PDE6G				UBE2J1
		BCS1L				PLAAT5				TBC1D3				ELF1
		NKAPP1				RNASE4				ABI3				REPS2
		TAF1D				ERC1				ZMYND10				TLR5
		SPATA9				NPTXR				ZSWIM4				RNF150
		DVL1				STARD7				STYXL1				TPI1P2
		SPDYE1				DPYSL3				KRT86				FOXN2
		PCED1A				SLC5A8				STMN1				NCSTN
		DNA2				APP				TRIM47				PARP4
		PPIEL				PARM1				CKS2				IMPACT
		KAT8				PTGIS				RHBG				ICE1
		SRRT				CPSF2				BANF1				ITGA6
		DICER1-AS1				MAMLD1				MRPL22				ZNF468
		DMTF1				TINCR				TRPV1				SLC16A2
		H1-10				PIGM				PES1				THAP5
		RAPSN				POLR3B				ARHGAP8				GK5
		KMT2B				PALS1				C20ORF96				EAF1
		ZNF514				WLS				CC2D1B				RUNX1T1
		GRTP1				PLOD1				PABPN1				SC5D
		DLEU2		Cell 2015+Firehose Legacy	21	AACS				FBRS				NOTCH2
		MSTO2P				KCNK3				CHTOP				SLC9A2
		PRSS27				AGPAT1				SPATA24				PRKDC
		NFE2L3P2				PDIA3				GNLY				PDCD6IP
		KCNMB3				SLC1A5				C16ORF86				AP2B1
		LINC-PINT				CHMP7				CABP7				SLC30A7
		POFUT2				ACO2				CDK18				ZNF136
		THEM4				MPI				YBX1				SMCHD1
		FRS3				CCDC134				AK1				IPO5
		HCG27				HSP90B3P				AAAS				UBE2Q2
		ZNF354A				TMEM121B				CFAP70				ACLY
		MEF2B				GLMP				DNAJB13				GCNT2
		GOLGA6L5P				ACOX3				DGCR8				ARHGAP12
		PLAC8L1				WDR81				PARVG				PGGT1B
		WSB1				MRPS27				ATP6V1F				KCNN3
		SPATC1				SMOC1				TMCO6				DPY19L3
		SDR39U1				TSPAN1				PDCD6				KIAA0232
		LINC00896				TSPAN6				NRN1L				FKBP5
		ELL				CACNG1				ZNF775				ERCC8
		POLR1HASP				SARAF				UCKL1				NFAT5
		SCARNA16				BCAS3				HNRNPH1				RRAGC
		ZXDC		Cell 2015+PanCancer Atlas	396	CLMP				OBSL1				GIGYF2
		DCUN1D2				HPSE2				CDRT4				FBXO3
		ZNF780B				SLMAP				GOLGA7B				STRN3
		GOLGA6L9				CIPC				MRM2				CHMP3
		CCDC14				EIF4EBP2				THAP4				EDA2R
		NSUN5				ELP4				SLC39A4				FAM199X
		MAN2C1				PANX1				PYCR3				CEBPZ
		CEP72				DCHS2				PCED1B				FMOD
		ZNF530				MDFIC				OCEL1				HSP90B3P
		SCART1				ZDHHC2				ASH1L-AS1				LUZP2
		SPDYA				DDB1				GSC				ANAPC1
		ASIC3				TLN1				H2AZ1				DMXL1
		YJEFN3				GNAL				EXOC3L4				PTPN14
		MBL1P				KLHL14				TRMT1				KCNAB1
		TMEM259				CACNA2D1				BGLAP				HMBOX1
		MUS81				MTM1				WDR70				CUL3
		CPO				SH3BP4				DRC3				SCFD1
		UNKL				FAT4				TELO2				PDE4D
		ZNF839				AP1G1				MAF1				NFATC3
		CCNA2				SOD2				SPAG5				ZKSCAN1
		RNPC3				MSRB3				DUSP28				FBXL5
		GTSE1				RNF14				CSNK1E				ARSK
		VWA3A				HEPH				KRT72				PRKACB
		WNT10B				ARL1				CHMP2A				TRHDE
		BAIAP2L2				SERINC3				ANKMY1				MAP2K4
		SPDYE8				TEAD1				RNF31				PTPN4
		CEMP1				JAM3				FAHD2B				DMGDH
		BRICD5				LHFPL2				MARCHF9				UBE2K
		SLC23A3				RAB3GAP1				RAD23A				HIPK3
		NUF2				ACTR8				PKN3				XPOT
		SNORA50C				KIAA1210				RNASEH2C				PROS1
		PJVK				SLC39A14				WASH7P				SOCS4
		LINC01590				TMEM19				NDUFB7				LIMS1
		RPL23AP64				STAM				MIER2				TRUB1
		DYNC2I1				LUZP1				SH3BP2				FAM120A2P
		MOSMO				ROCK2				DXO				PAK1IP1
		FHIP1B				TLR1				CHKB-DT				MFAP3L
		GPT				MAML2				NFKBIL1				SETBP1
		NAA40				CYP2U1				KRTCAP3				ZBTB41
		KLHDC2				SLC8A1				APBB3				PPM1E
		C12ORF76				PLN				RNF126				AHCTF1
		TRMT11				VGLL3				RPS10				CDS2
		RHBDL1				PTPN11				GPSM1				ITGA2
		NPHP3				LNPEP				C8ORF76				ABHD18
		LRRC39				PDCD4				PSMB7				DOCK4
		TSEN54				TBX5				ZNF16				MAST4
		LINC03025				MPP7				NELFA				VPS53
		ARGLU1				SLC16A7				TREM2				COG8
		ZNF3				FITM2				AK8				SLC5A3
		TBC1D3				ATP8B2				HDHD3				NAA15
		MROH5				NEDD4				CAPNS1				NATD1
		ZSWIM4				DYSF				SNHG15				BLOC1S5
		ANAPC10				NKD1				EID2B				MCTP2
		TARBP1				PRKAR2A				KLHDC3				SUPT16H
		ZNF75D				DPH3				CLDN3				DTWD2
		TNFRSF25				MEIS3P1				EEF1D				ZC3H12C
		SERINC4				CAPZA2				PLGLB2				GLCE
		GTPBP2				BLTP3B				SOD1				PIGK
		CWC25				LCOR				PRKD2				DAG1
		GOLGA2P7				FOXC1				DYNLT2				RSPH3
		RECQL5				VWA8				MSRB2				PTPN9
		PROCA1				SEMA3E				DRICH1				ARID1B
		C6ORF163				BPNT2				FXYD5				KLF9
		HSD17B7P2				TIPARP				LRFN1				FIGN
		CKS2				PPM1K				FAM226B				PYROXD1
		RHBG				IPO8				WDR74				ZFP1
		TEPSIN				MMP16				TMEM175				VPS50
		CHP1P2				MYO5B				TRIM17				WDPCP
		TRPV1				FEM1B				DNPEP				YES1
		PWAR1				ABHD2				ZSCAN21				MAGI1
		SLC26A6				SNX19				ABCB9				SLC35A1
		ZNF862				CSDE1				UPB1				ARID2
		C20ORF96				ERLIN2				LAT				RDH11
		CC2D1B				TNFSF15				SPEN-AS1				BTBD8
		RPS15AP10				DHFR2				PIF1				SP4
		PABPN1				CNOT1				CDT1				ASAH2B
		GBA2				ADCY5				UFD1				BROX
		DOCK6				FGD4				CFAP53				ZDBF2
		CHTOP				PCDH18				DIABLO				KIF1B
		SPATA24				GPRASP2				MRPL14				GSK3B
		HEXD				NACC2				FAHD2A				RALB
		ZDHHC17				ITGA1				CENPW				ZBTB4
		ITGA10				ERMP1				GPATCH3				GPD1L
		QSOX2				ARID5B				NHERF2				FOXO1
		VPS29				TMEM33				QRICH2				KIF5C
		PNISR				ADGRL2				SRRM5				PANK3
		RAB24				PRRG4				CCNB1IP1				CNKSR2
		CFAP70				TENM2				RGS11				MAPK1IP1L
		ZNF577				NCEH1				ATP6V0C				PKP2
		IQGAP3				SLC35A5				SGTA				USP51
		MTF2				EPHA4				SH3D21				PIAS1
		DGCR8				TCF4				SCT				SNX29
		CCDC174				ALDH1L2				RTRAF				ADCYAP1R1
		DUSP12				ALDH1A2				RPL28				WWP1
		INPPL1				TSHZ2				SEC61G				ZNF611
		TMCO6				AHCYL1				TRIM11				CEP104
		IGHMBP2				AHNAK				D2HGDH				LRRFIP1
		DOC2A				NDNF				CCDC17				GCLC
		PDCD6				PBX1				RPL18A				ZC3H14
		FAM238C				CBX6				UBOX5				MAN1A2
		ZNF767P				FBXO33				ATXN7L3				RBMXL1
		LINC01134				USP9X				SMIM26				ALDH5A1
		UCKL1				UBQLN2				UBL5				POLR2M
		C12ORF71				SORCS2				DPH7				FKTN
		DCST1				NR3C1				NUDC				TWSG1
		HNRNPH1				GNAO1				SLC66A1				CASP8AP2
		ZFP62				MTOR				COMP				FBXO30
		OBSL1				LEPROT				TMEM39B				CDC40
		CDRT4				MTMR6				RPL3				MYOCD
		ZNF84				SLC35F1				H2AX				GALNT10
		EGFL8				TOR1AIP1				TCAP				FHIP2A
		TAS2R31				VSTM4				TRMO				LSAMP
		KMT2E-AS1				RAB27B				FAM156A				ELK4
		SIRT7				ALDH6A1				WASH2P				METAP1
		SLC25A2				FZD7				SLC6A8				TRIM6
		INO80B				TMEM47				CRIP2				SPAST
		PDIA2				TMTC3				LINC00685				ANGPTL1
		ALOX12				DIXDC1				WASH5P				SMURF2
		LINC00964				SPOCK3				DAXX				GREB1L
		IP6K2				DLST				MPLKIP				RPS6KA2
		ASH1L-AS1				SLC2A10				ABHD8				CCDC47
		HNRNPD				ST8SIA1				TAF11				FAM13A
		ZNF528				NCAPD3				ARF5				SLC25A24
		U2AF2				TMED7				SLC3A2				BBX
		BMS1P1				CPVL				TARBP2				AVL9
		ZNF44				KCND3				TRIOBP				TNRC6B
		CCS				ZNF516				RBM5				RFK
		TCHP				DBT				KHDC4				ZFYVE9
		TRMT1				BRINP3				ADCY10P1				TCTN3
		PPIH				MPO				CHEK2				TRIM24
		ZMYND19				RAB9B				NUDT16L1				TRIP11
		CENPE				NYNRIN				DRD4				SLC25A30
		ZFAND1				ARMH3				PRKRIP1				C9ORF72
		RRN3P3				SHISAL1				WDR27				ATL1
		TELO2				STAT3				RBMX2				PTCD2
		COL11A2				LRP1B				SYF2				B3GALT2
		SPAG5				CLVS2				CHST12				USP38
		DUSP28				CYP7B1				GUSBP11				ARMCX3
		AMY1A				MPP2				LRSAM1				ZFX
		CSNK1E				TEX2				BARX1				ABCC9
		KRT72				AP5M1				B3GALT6				HMGCR
		PHC1				LIPA				H4C4				KDM4A
		RBM12B-AS1				PAK3				ZNF688				PHAX
		ANKMY1				UBE2J1				APOC2				GPR155
		SRSF7				NCSTN				HDAC11				ZNF727
		LSM14B				SLC16A2				VMO1				ACSS3
		RNF31				SC5D				PEDS1				ARHGAP20
		TAS2R5				NOTCH2				PTPN6				ARMT1
		ABCA10				SLC9A2				JMJD1C-AS1				DIPK2A
		AFDN-DT				PDCD6IP				TNIP1				ABCD3
		STK36				ARMH4				DLG5-AS1				HERC1
		RNASEH2C				SLC30A4				KTI12				NR3C2
		WASH7P				TECPR2				NSFL1C				INPP5F
		BRPF1				RUNDC3B				RHOG				GSR
		TAS2R4				CRYBG3				MED15				SLC25A40
		SH3BP2				MAN2A1				MTA1				FAM20B
		CEP290				PTPN14				CDC37				COPB2
		TEDDM1				KLHL4				ZER1				CTR9
		TBCE				FBXL5				SNX22				UBR1
		MPHOSPH10				TRHDE				CROCCP2				CDC27
		DXO				CAND2				NR2F6				DCTN4
		HSD17B3				PRUNE2				RPUSD2				VPS35
		APBB3				HIPK3				MAPK11				CCSER2
		GHRLOS				SETBP1				TBC1D22A				PLBD2
		HOXA2				CDS2				HIP1R				EIF2AK2
		HNRNPA2B1				ITGA2				PTGES2				AP1S3
		DPM1				CAVIN2				SNAPC2				LMO7
		GPSM1				NFIC				ENO3				SOGA1
		MSH4				NATD1				TMUB1				SIKE1
		TSC1				GRIA3				EMC6				GFPT1
		C8ORF76				MLLT3				ASIC4				ME2
		AASS				DAG1				TNFRSF18				MAN1A1
		TNRC6A				NIPAL2				GALT				CD302
		GNG3				TMED10P1				ZNF263				TRPM7
		ZNF793				LRP10				LBHD1				CGNL1
		ADHFE1				ZFP1				C2ORF27A				FOXP2
		RAD9B				SOAT1				CRIP1				FEM1C
		TACC3				F8				TPT1-AS1				ATP11B
		NELFA				VPS35L				LAMTOR4				NUCKS1
		SEM1				FREM2				NOL7				RB1CC1
		OXSM				HEG1				ICAM3				POLR3A
		RBM14				CNKSR2				ADAM8				EIF4E
		HDHD3				PKP2				HSPA7				RPE
		ADORA2A-AS1				PRNP				RGS12				RCOR1
		FBXW10				PIAS1				RNH1				ABHD5
		SNHG15				ADCYAP1R1				TOMM5				SMAD2
		LHX4				CLTC				ARL6IP4				RMND5A
		GOLGA6B				MAN1A2				RPL35A				HEATR5A
		IKBKB				CPED1				JUP				EIF5B
		IZUMO1				FBXO30				CCDC157				FOXJ3
		RFPL3S				PRICKLE2				RAB40C				SLC35F5
		ZC3H8				CPT2				LY6G5B				EMB
		TYK2				LIMK2				PRDM10-DT				UTP25
		ZMAT1				TRIM6				MAMDC4				LPAR3
		DNAJB7				RPS6KA2				FAM223B				TRAF6
		MEX3A				BBX				EHD1				KIAA0408
		MRPL23-AS1				DAAM2				CYBC1				METTL14
		ZNF706				NCKAP1				ZNF252P-AS1				ANO4
		PLGLB2				ABCC9				SCAF1				PUM2
		OR2H2				HMGCR				CHCHD6				TFAM
		DYNLT2				ACSS3				DDTL				SASH1
		DPY19L2P1				ABCD3				MTERF3				RALGAPB
		DRICH1				GSR				SLC2A4RG				ACADM
		C5ORF63				CREB3L2				CLEC2D				ALG10B
		RNF146				CDC27				CEACAM19				OGN
		TRIM66				CCSER2				EIF2B1				FAM8A1
		LBX2				VPS35				CTRL				PPP3CB
		FAM226B				PAM				C14ORF93				CXCR1
		RPL32P3				VEZF1				JMJD8				HECTD1
		ZNF10				MAN1A1				CHADL				VKORC1L1
		GLMN				ASXL3				MRPS21				ERCC4
		ZNF763				CD302				NPM3				SLC31A1
		KRTAP5-8				STARD8				B3GNTL1				ZNF493
		MCM7				HSPA13				ARPC5L				TBCEL
		ZSCAN21				ARHGEF37				MAGOH				HS3ST3B1
		TRIM52				PPP1R12B				CENPB				SPPL2A
		TBC1D3G				DAB2				SNHG12				ZNRF2P1
		ZNF786				AFF2				TAF1C				SFXN1
		ASPG				ZYG11B				CFAP65				MYO9A
		PRICKLE4				ZDHHC15				ZMIZ2				FOXN3
		TYW5				ALOX15B				CSTB				TXLNG
		AGAP6				SHISA6				PTRH2				TEP1
		ASPDH				OGN				NDUFA12				TMEM182
		PABIR3				PPP3CB				PLEKHJ1				KIDINS220
		SAPCD1				ERCC4				ZNF668				KIAA0513
		REXO4				SLC31A1				SNHG6				PLCB4
		LAT				SERINC5				RPP21				MAPK1
		SPEN-AS1				FOXN3				CCNF				GOLGB1
		PIF1				TMEM182				SRM				ATP9A
		CPSF6				CLIC4				RPP25L				FNIP2
		MASP2				SYT6				FOXH1				ETV3
		C1QTNF6				PRKG1				MRPS6				G3BP2
		ZNF211				WIPF2				PPM1G				WDFY3
		SMG1P3				PLXDC2				SPACA9				CLIC4
		QRICH2				FTO				AKAP8				NHLRC2
		ZNG1C				TACC1				SNX8				ZNF430
		SRRM5				SH3PXD2B				MVB12A				API5
		TTLL9				GOLM2				MRPL58				BIRC6
		RGS11				AK4				SSH3				RCHY1
		STK31				SNX18				SARNP				POLR1B
		SLC25A27				SF3A1				PLEKHF1				FTO
		SFI1				SORBS1				TIMM50				ATOSA
		TMEM91				VPS4B				HDAC10				TACC1
		LRRC37B				LIFR				TMEM272				MARCHF5
		SH3D21				TOX4				ZFYVE27				SH3PXD2B
		SLC22A13				AFAP1				ELMOD3				SAMHD1
		QTRT1				SPTLC2				AIFM3				PTBP3
		C1RL-AS1				TTC28				MROH6				PPP3R1
		D2HGDH				ITIH6				SWI5				EPC2
		CCDC17				PURA				ZNRD2				USP46
		ATXN7L3				TRAK2				SUZ12P1				UGGT2
		TCERG1				SLC1A1				MRPL51				STIM2
		ANKRD36				CFL2				MED26				MYSM1
		UBXN11				KIAA1671				NDUFB2				MDM2
		DPH7				ANKFY1				DUS1L				SNX18
		SULT1A3				IQGAP1				SLC25A45				DYNC1LI1
		LINC01126				ENTPD4				ZNF789				SF3A1
		GPR35				SLC18A2				HARS2				EIF3A
		LINC00115				RNF152				TOMM40				SPTY2D1
		TRA2A				CNTN1				AKR7L				KLHL15
		SCLT1				GNAQ				RPL23A				SEC24B
		PPP1R3E				PALMD				TRIM46				NBEA
		ABCC5				CCNG1				UPF3B				EGFR
		NSUN6				WDR7				SYCE2				VPS4B
		CHORDC1P4				SLAIN2				PIDD1				ST13P4
		CRIPAK				GNE				POLD1				ZNF808
		PRDM10				ENDOD1				TIGD3				TNPO1
		CMTR1				IFT70A				SNRPB2				GBE1
		ZNF433				STARD4				LCAT				ZNF268
		DNAJC27				ABAT				MBOAT7				CLASP1
		ABCA11P				CAV1				SCRT1				MYLK
		FAM156A				SCARB2				APBA3				RAB6A
		CCNE2				PTPRG				RPL31				AFAP1
		NBPF7P				PCDH10				HAUS7				UNC5C
		PDE7A				SLC9A1				ZNF814				PAPOLG
		LINC00685				ZNF423				PIGU				PGAP1
		WASH5P				IL6ST				WRNIP1				ITPRID2
		MPLKIP				DNAJB9				PKP3				GPR161
		TAF11				CTBS				MRPL23				MTMR4
		GEMIN2				PPM1L				CLBA1				NECAP1
		LMBR1L				UBE4B				CNOT3				FZD5
		RBM5				SLC30A6				SDF2L1				TTC39A
		RHOT2				MED21				C1ORF159				USF3
		UVSSA				SCAMP1				ZNF821				PURA
		DPP9				IL17RA				IGFBP3				TRAPPC11
		RGL2				LDLRAD3				PSMA6				LYVE1
		ANKK1				NIPAL3				EIF3I				CREB1
		UTP6				FBXL17				KIF22				DCLRE1A
		GSDMB				LINC01018				NINJ1				LNPK
		PMPCB				DENND10P1				JMJD7-PLA2G4B				SMAD1
		LIG1				CAB39				UCP3				TRAK2
		EHMT1				TMPPE				MYL6B				NEO1
		ADCY10P1				TM9SF2				SNORA72				RAB3GAP2
		LSM8				CELF2				CDKN2AIPNL				CFL2
		DRD4				MAPRE2				DEXI				RASA2
		PRKRIP1				POLR2A				OST4				STAG1
		TERT				FGF10				ELOB				NAAA
		WDR27				OGFOD1				MKS1				ABHD13
		CDAN1				NAA30				FBXO6				CCPG1
		FAM72A				PDE11A				P2RY11				BTBD1
		CDK5RAP3				GCNT4				ODF3B				TRDMT1
		IFT88				SCN7A				KISS1				ANKHD1
		BTN2A3P				TLR4				LINC00663				RBSN
		KLHL31				PCDH9				IFRD2				PDP2
		KANSL3				TAF3				WDR83				FCF1
		TARDBP				ATF6				COMMD6				VPS37A
		GUSBP11				HFE				ANKRD13D				APOOL
		LMNTD2				TMEM64				DENND6B				BAZ2B
		TNFRSF14				MAP1B				PYCR2				RNF152
		LINC01089				RBMS3				PNMA3				TGFBRAP1
		ZNF160				CAP2				FAM20C				CNTN1
		H4C4				ZMYND11				TSPAN17				ZNRF3
		MZF1				FAM124A				BICRA				AGL
		ANKLE1				GLRB				MAP1S				ZBTB21
		PAN3				BAG5				TTC4				ZDHHC20
		MTA1				WWTR1				KRBA1				TENM3
		SETD1B				TGFBR3				NDUFS3				TMEM181
		CDK2				ILDR2				METTL17				MINPP1
		NABP1				CAT				THUMPD3-AS1				PALMD
		ZNF606				HBS1L				KLHDC9				EYA3
		UNC50				TMEM30A				PPM1N				BOD1L1
		NUP107				JAK1				EIPR1				WDR7
		CDC37				ITGA9				ZFAND2B				TTC39B
		PLIN5				OLFML3				PTDSS2				SLAIN2
		SLC25A36				SLC35E3				SETD4				PRPF8
		RPP38-DT				PIK3R1				CHCHD2				GNE
		ZNF169				WBP11P1				MAP2K3				C3ORF70
		ZNF26				ADAT1				SCAP				ATF2
		CROCCP2				SERINC1				RPL38				CEP85L
		CYSRT1				ARF3				PRCC				ARL6IP5
		PABPN1L				RAB27A				RPS16				PLEKHB2
		LUC7L3				CERT1				ZBTB32				ADGRG2
		POLE				PEX19				DDX56				CCNT1
		BBS5				NNT				RPL14				ARFIP1
		DDX17				ALG10				TMEM208				PHACTR2
		IFT27				CNIH1				ADCK5				HELB
		ENO3				SLFN5				PLK5				RPRD1A
		L3HYPDH				ITGB3				ARHGAP27P2				SLC35E1
		ASIC4				ARHGAP35				AMHR2				APOLD1
		DNM1P35				MARCHF8				CTTN				PDE5A
		STX10				CDKL5				ABTB1				MAPK8
		DDX59				TLL1				CISD3				EIF3J
		ZNF559				NHSL2				TMEM147				RIMOC1
		TNFRSF18				GPRC5B				FKBP2				TOM1L1
		COL6A4P2				CTAGE1				TYMP				ZNF426
		ZNF263				CTSO				APOC1				TMEM167A
		AKAP8L				DDR2				WDR73				MFN1
		DSCR9				CBX5				ARFGAP1				SRP54
		C2ORF27A				ADAM22				UQCRH				STARD4
		ANKRD20A11P				IDE				NCLN				OSBPL1A
		ASB14				EFR3A				ZNF251				CPEB4
		TPT1-AS1				SUCLG2				RPP38				MED13
		RNPS1				FICD				TFAP2E				CAMSAP2
		NR2C1				THSD4				VEGFB				RFC1
		STK19				IFT70B				COLQ				MTAP
		LEKR1				ACTN1				DRG2				HCFC2
		ZNF594				ATE1				MAEA				PTPRG
		C1QTNF12				PLA2G12A				SAFB				NCOR1
		AFG2B				HSDL2				MAPK8IP1				MOCOS
		HSPA7				APC				ANKZF1				AFDN
		EPS8L2				ZNF804A				TRMT2A				SLC30A1
		NUDT13				ARCN1				DYNLT2B				ANKRD44
		PLEKHD1				FAM120B				MFSD3				TMBIM6
		CCDC157				LYRM7				METTL1				UBE2H
		STK11				BNC2				LZTS2				FCGR3B
		LY6G5B				MFSD9				FZR1				LACC1
		MAMDC4				PARD3				RCN3				TMEM38B
		CBX3				ADAMTS5				DBNL				NFE2L1
		PAXBP1				ATP2A2				ATOX1				FUT11
		EME1				RGS7BP				TSPAN32				PPP1CB
		FAM223B				ROR1				BCL2L12				USP33
		SMPD4BP				UEVLD				ZAP70				ARK2N
		ZNF782				PPP2R3A				ZNF554				ERBIN
		ZNF512B				MID2				PTPRCAP				ZNF121
		MSLNL				ABHD6				RAE1				RAD50
		SNORA31				AOX1				IRX2-DT				PCMTD1
		ZNF252P-AS1				ANO6				DLGAP1-AS1				MBTPS2
		ZNF768				MAB21L1				LRP3				ZNF573
		OR51D1				HSD17B6				NMB				RSBN1
		LINC00479				ARL5A				EIF6				CMTM4
		ZNF550				EHHADH				POLR2L				TSPYL1
		BRD2				ALDH9A1				MRPL4				TUBGCP4
		MTERF3				ATP8B1				SH2D6				RALGPS2
		SPIN3				TMEM106B				TMEM160				FER
		CLEC2D				HCAR1				MTA2				GSPT1
		ZNF746				SEMA3C				AXIN1				WDR44
		CEACAM19				PDGFC				LZTR1				SUZ12
		AGAP3				KAT2B				ARVCF				EXTL2
		CPOX				DPY19L1				POLR1C				PI4K2B
		OMP				RHBDD1				RENBP				MED21
		CTRL				B3GNT2				NUBP2				IL17RA
		TENT4A				PDE12				KIF7				FBXL17
		USP36				MYADM				SVBP				ZBTB10
		ZNF830				AFF3				CAPN3				LINC01018
		MRPS21				DRD1				METTL23				DARS1
		ZNF567				IQGAP2				FAM43B				ZNF585A
		FAM219B		Firehose Legacy+PanCancer Atlas	22	PINK1				CTNNBL1				SELENOI
		MAGOH				TPRG1L				CCDC12				RNF111
		GATA2				HBEGF				UCN				ATP2B4
		S100PBP				DDX24				ZNF764				CLPX
		RABL2B				RTCB				USF2				SLC24A1
		ZNF37BP				DCTN1				NRM				ARHGAP5
		SNHG12				JPH2				POLG2				ATXN1L
		TRAPPC14				DES				TPD52L2				DDX21
		TAF1C				TPD52L1				PLAAT4				RB1
		ZNG1B				LHPP				IFI27L1				DHX29
		ZMIZ2				BMPER				SLC9A5				LINC01881
		HINFP				B3GALT4				USP20				SLC35D1
		MRPS25				RASL12				SLX1B				LYSMD3
		STAG3L2				KIF1C				MCRS1				ERLIN1
		TTC14				TMEM242				BBLN				COA7
		MAPK8IP3				UGP2				PHKG2				RNF24
		FOXH1				PSMD7				RPSA2				NUMB
		NFYB				ACTA2				TOP3B				STXBP4
		SCARNA7				AP5S1				BCO2				MIDEAS
		AKAP8				CKM				FHIP2B				TM9SF2
		BCRP3				MLYCD				SCARNA10				CELF2
		PNPLA7				CBR1				MSL3				SHOC2
		ASXL1		Cell 2015	783	CD44				FAM13A-AS1				PDHX
		ZNF135				COBLL1				ODAD1				CLCN3
		SNHG1				RPTOR				MXRA8				XRN1
		POU5F1				KANK1				MAPKAPK5-AS1				GPAM
		RBM39				VPS33A				RPS23				SSR1
		ANO8				CMTR2				SCYL1				RBFOX2
		HDAC10				GPHN				UAP1L1				HEATR6
		INHA				STT3A				SYNGR3				PGR
		WDR90				TSPAN11				RALY				INTS2
		MIRLET7BHG				ATRX				C4ORF48				TMED10
		TMEM272				RNF38				TTLL13				ZNF507
		ZFYVE27				MPL				HMOX2				LRP12
		ELMOD3				MACF1				FAHD2CP				LRRC8B
		CUTALP				SEC24D				LINC00482				MAPRE2
		RPSAP9				SOS1				ZNF581				ARFGAP3
		PMS2P3				LMAN1				DDX27				POLR2A
		CFAP119				EHF				ZNF513				FGF10
		SHISA7				FRMD3				ANKRD10				CSNK1G1
		WHAMM				SIDT1				HAGHL				KIF13A
		RUFY3				GTF2A1				CACNB3				MBNL3
		MROH6				HMGCS2				PEX14				OGFOD1
		FASTK				KIRREL1				UBE2I				ZFYVE16
		PMS2P2				ITIH5				PAQR6				CLIP4
		TNFRSF6B				SEC23B				CAMSAP3				SYNJ2BP
		SUZ12P1				SERPINB5				FLYWCH1				RC3H2
		CENPK				NBEAL1				SLC25A1				SGCD
		FDPSP2				GPR107				GRB7				SCN7A
		MED26				NDUFS1				TMEM223				SEC62
		CAPN15				NWD1				CFAP73				PEG3
		LINC01341				MIER1				FAM89B				TAF3
		RMST				MSH3				GOLGA2P5				ZMYM4
		NHLH1				DSP				ATP5F1D				SP3
		SLC25A45				MET				NPB				RAP2A
		ZNF789				EXOC5				HSPBAP1				ZNF532
		AKR7L				MSN				SPRN				ZNF106
		UPF3B				FLVCR1				N4BP2L2-IT2				ZNF772
		SYCE2				HOXA13				MRPL12				RSPRY1
		PIDD1				SNX33				R3HDM4				ISOC1
		POLD1				AKAP7				ZNF574				TMEM64
		SCRT1				URB1				CYP21A2				ZDHHC21
		LINC00244				ASCC3				RPL12				MED12L
		ZNF418				DIP2C				ZC3H3				ARG2
		ZNF404				TCAF1				CCDC137				BRMS1L
		PMS1				PAPSS2				CHEK1				VPS54
		CDRT15P1				ENTPD3				SCRN2				STS
		DDX39B				RNF141				TRNAU1AP				TM9SF3
		RAB28				NOS1				LINC02145				DCAF10
		ZNF814				BMPR1A				FAM241B				PRMT9
		RPS25				USP6NL				TRMT112				DDHD1
		TLK2				SLC25A46				PDE6D				ALDH1A3
		ASMT				SEC14L5				CLK2				RBM41
		TSSK6				ARHGEF12				PPP6R1				MAN2B2
		CNOT3				GLUD2				LMF1				RAPGEF2
		C1ORF159				ZNF702P				ZNF692				OR51E2
		KCNIP2				SEL1L3				HMGN3				SHANK2
		ZNF207				KPNA3				MRPL48				GINM1
		EXOC7				C1QL3				KIF18B				CHP1
		TEX29				APOL6				SUPT5H				ZCCHC2
		YAE1				ALDH3A2				SMIM45				PURB
		PSPC1				SLC2A13				MRPL28				CHIC1
		TAF15				PLP2				STMN3				ACAP2
		ALB				MRPL19				CDK2AP2				CARNMT1
		ZNF823				VWA5A				RIPPLY3				BAG5
		LINC02910				PGAP4				PLXNB1				PRDM5
		FAM47E				DPP4				COMMD7				PPP4R2
		JMJD7-PLA2G4B				HTR7				ARHGAP45				SDE2
		SEC61A2				ZNF148				BCAP31				SLC39A10
		LTK				RTF1				MED8				DTD2
		UCP3				PAFAH1B1				CXXC1				TGFBR3
		ALKBH6				KATNAL1				LAMB2P1				PDIA6
		SNORA72				NEFH				C11ORF68				BEND3P3
		USP32P1				CCNY				GDI1				SUCO
		HAUS3				RAPH1				SNRPA				CDC23
		TPTE2P6				PCYT1A				PIH1D1				ZMYM2
		MKS1				TBC1D5				KRTAP5-9				TAB3
		P2RY11				ROR2				CCM2				MAP3K7
		CCP110				SRPRA				GARIN5A				ILDR2
		MCM3AP-AS1				SPRR2D				MED10				KIAA1586
		PGAM2				USP14				ARHGAP4				BAG4
		LRIT3				MFAP3				EHMT2				PPIP5K2
		ANKRD13D				CACHD1				NDUFAF6				GTF2I
		RRP7BP				GAN				COX17				LAMP2
		RNF222				EXOC6B				RSKR				FBXL3
		ENGASE				SGPL1				CCDC102A				DGKE
		SNORA67				SWAP70				COA5				CAT
		RBIS				CHST15				WTIP				MPHOSPH9
		PRPF40B				OSMR				FAM24B				ICE2
		PNMA3				STEAP3				GTPBP3				SLC7A1
		RBM25				UBR3				ARHGAP33				UNC5D
		BICRA				ABCA1				PACS2				KDM1B
		NOXRED1				DDAH1				SNRPF				SSPN
		CRAMP1				REST				ATG4B				FAM168A
		METTL17				CHMP1B				EMG1				APH1B
		THUMPD3-AS1				FNIP1				SNU13				TBC1D15
		HGFAC				LRRC58				FBRSL1				RASA1
		CCDC7				MGAT5				BAG1				CTNND1
		TNPO2				EXD2				TECR				ITCH
		SNORA57				MEIS2				NUPR1				ZNF660
		MGRN1				RASD2				NDUFB4				NCBP3
		PGS1				CPEB3				TRIM65				KLHL42
		ZNF674-AS1				SLC40A1				PUS1				NCOA2
		CENPT				SCP2				SMYD5				N4BP1
		LINC01001				KIF5B				RPS13				TANGO6
		CCDC78				PRKG2				TUSC2				BNIP3L
		SETD4				SDR42E1				RBM19				ATP10D
		ATXN2L				PIK3CB				TAPBP				PRKCH
		SCAF4				ELAPOR2				SYNE4				STAM2
		CLASRP				ATP11C				RCC2				LZIC
		FKBP6				SH3GLB1				EOLA1-DT				WDR48
		ZBTB32				PAX9				EXOSC9				PIK3R1
		DDX56				RNF39				PDRG1				CFAP97
		ANKS3				ABRAXAS2				MSI1				RASSF8
		RBM28				IPP				CC2D1A				HELZ
		CLEC18C				MAGI3				MFRP				TRAK1
		SRRM2				GALNT5				STRADA				USP12
		ZNF682				CXCR2				BATF3				WBP11P1
		PMS2P9				SPTBN1				FTL				DMD
		PBX2				EXOC2				ARIH2				STAMBP
		ADCK5				PI4K2A				FNDC11				PREPL
		PLK5				TEX261				CHKB				ADAT1
		GIGYF1				GNA11				SCNN1D				HOOK1
		RELL2				RAB5B				NFYC-AS1				RABGAP1L
		ITIH4				SGCB				FAAH				ZNF737
		TTTY10				LTBP1				PVRIG				FPR2
		CCDC183-AS1				TRIP12				MAP4K1				KLHL20
		CPNE7				SMAD9				ACCS				NEXMIF
		EVL				MEAK7				VPS51				C12ORF4
		GUSBP4				RGL1				PRH2				FZD3
		LINC00526				APPBP2				PPM1M				MXD1
		CDK3				ZBED1				CDKN2D				SOCS5
		ZNF235				PRKD3				LSMEM1				AZI2
		RBM48				KDM5A				NRBP1				CHURC1
		WDR73				ZNF609				STUB1				CCBE1
		ARFGAP1				TMEM87B				CRYBA2				CERT1
		ESPNP				NUDT12				SLC25A22				ELAPOR1
		AOC2				EPHA5				TLNRD1				SHTN1
		ZNF251				AHCYL2				EPS8L1				SMARCAD1
		BTAF1				TCF12				MRPS7				CNIH1
		TFAP2E				ERAP1				CCNL2				FRG1BP
		COLQ				ATP7A				C1ORF52				BMI1
		TMEM81				ATF7				RNF113A				OIP5-AS1
		MAEA				UFL1				NHP2				FNDC3B
		SLC19A2				DSG2				SELENOH				USO1
		ZBTB17				SLC47A1				SNORC				RNMT
		ZBED5				COX10				RNF216P1				GPR63
		BCDIN3D-AS1				IRF6				TFPT				BLZF1
		SAFB				NBR1				DPM3				ZHX1
		MRNIP				HSPA4				AP4B1				SARAF
		ZNF471				PAPPA				FMC1				SIRT1
		GNB3				SLC7A14				MPV17L2				CD164
		ZNF224				VSIG10L				ZBTB45				SHLD2
		ANKZF1				EVI5				EOLA2-DT				ATRNL1
		HMGB1				SMC1A				DGKZ				AREL1
		TRMT2A				PLA2R1				EFNA1				MIA3
		ZNF519				ULBP3				GPKOW				SLC27A2
		SENP5				KCNQ5				SULT1A1				TMEM135
		L3MBTL1				ZBTB20				YY1AP1				ARHGAP35
		BICDL2				CACNG4				MAPRE3				CPE
		PCP2				ANTXR2				SPEF1				CDKL5
		CEP295				AGGF1				CERKL				IGF2R
		XRCC2				HOXD13				H4C5				MMADHC
		C1ORF220				HSPA4L				BOLA2				RGPD3
		DONSON				GABRQ				MAP2K2				UST
		TSPAN32				TTBK2				RFX1				AFTPH
		ZAP70				PLXNC1				MEPCE				RFFL
		ZNF485				LIPH				UQCRB				BTD
		CCDC183				OSBP				CARS2				CALD1
		ZNF554				PDIA3P1				CSNK1G2				NIPAL1
		SLFN14				UTP14C				SAMD1				NHSL2
		DFFB				PPTC7				RSPO4				LARP4
		OCLM				SPG11				MRPL20				SIAE
		ZSCAN18				CSTF2T				SDHAP1				ZMPSTE24
		SH2D6				FOCAD				RHEBL1				SKIL
		MNAT1				STOX2				NPM2				KLHL11
		FBXL12				PERP				YDJC				HMGCS1
		DNAH14				LINC01558				ADAMTS14				UBE3A
		MAST2				DUSP18				HSPA6				PYGO1
		ZNF189				RSU1				NR1H2				ZNF570
		LARRPM				PBRM1				ARHGEF39				C2ORF69
		SLTM				UHMK1				ZDHHC12				TMEM192
		LZTR1				BICRAL				PHC2				DNM1L
		AXIN1				XCR1				ANXA2R				CTSO
		ARVCF				LUZP6				SLC25A29				RPN2
		KANSL2				MTF1				SPHK1				RAD54L2
		RASSF7				ZNF778				CA5BP1				HIBADH
		PWWP3A				PARP11				VPS9D1				ZNF252P
		PROZ				KLHL9				IL34				DEK
		ATXN7L2				RPEL1				TSSK3				DNAL1
		ZNF473				HUWE1				PRR5-ARHGAP8				IDE
		CAPN3				ZC3HAV1				RUVBL1				RNF11
		RHOXF1				LEPR				MAD1L1				EFR3A
		TIA1				YIPF6				C19ORF44				CERS6
		SLC25A37				PROX1				TMUB2				SUCLG2
		POLI				SV2B				TRPT1				FHIP1A
		ZBTB34				CAPN6				ZNF296				IFT70B
		CLHC1				PPL				TNK2				RAB18
		KCNAB3				USP13				NOP16				GPRASP3
		UCN				FMN1				NDUFA4				VAMP7
		ZNF764				ASXL2				DIPK1B				PLA2G12A
		USF2				ARHGAP42				NFKBID				ZNF91
		POLG2				PEAK1				DDAH2				SLIT2
		SNHG4				HRH2				GATD1				RSF1
		FBXL6				ENTPD7				IER5L				KCTD3
		ZNF248				PIEZO2				CHCHD1				LIN7C
		AGAP5				SLC9A7				ZDHHC19				TMEM184C
		LINC01106				CDK6				ATG4D				APC
		FSCN2				SYTL4				RNF187				ZC3H15
		KCTD15				RDX				FBXW9				ZNF233
		RPL36A				CTSB				SLIRP				GALNT1
		SLC9A5				ZXDA				CDC26				SEPTIN10
		PTPDC1				SVIL				NAA10				SBNO1
		SMARCD1				MYOF				NDUFAF7				DOCK7
		FAM201A				AFF4				PPP1R16A				ADNP2
		USP20				CHAMP1				RRS1				ARCN1
		B4GALNT4				FRMPD4				CLEC18B				MAP1LC3B2
		FBP2				LMBRD2				RBX1				DNAJB14
		CCDC50				MTMR12				ANKRD54				SEC24A
		ATAD2B				SYNRG				ZNF497				RTL6
		TAS2R10				KLHL21				EDF1				TRMT1L
		TAF7				LDLR				CRYBG2				MACROD2
		AGAP11				SCRN1				GTF2H4				AKAP11
		SFPQ				BVES				ZCCHC3				SGK3
		NSD2				FAM177A1				BLOC1S3				LYRM7
		KCNT1				PPP1R3B				CENPA				GLB1
		SMPD4				TAB2				RNFT2				FBXO28
		MRI1				DNAJC16				PARP2				AMOT
		ZNF500				DDI2				ADAMTSL2				TMTC1
		CROCC				TANC2				ATP5MF				TTC33
		PTPN12				ZNF271P				CALY				ERGIC2
		TBC1D29P				TLR8				IQCD				NRK
		ZNF202				FGFR2				ATP5MC2				KICS2
		TOP3B				AOC1				TMEM183A				RGS7BP
		BCO2				MMACHC				OVOL2				MCPH1
		FAM13A-AS1				EXOC8				PYGO2				FBXL4
		MSL3				B4GALT6				EIF3F				ROR1
		ODAD1				ZNF827				ZNF436-AS1				PPP2R3A
		MAPKAPK5-AS1				SYDE2				LENG8				ZFY
		CLCN6				EPHA7				TOM1				PPARGC1B
		SCARNA9				EGLN1				SNHG7				BMP2K
		SNRNP70				SCD				MCRIP1				TBC1D23
		UAP1L1				CD177				AATF				DEPDC4
		MAN2A2				SGTB				CDC20				FAM13B
		GABPB2				SLC39A9				UGT1A6				KRBOX5
		INTU				FEM1A				SLC26A11				SESTD1
		YOD1				TM9SF4				LYPLA2				SLC4A4
		PHKA2				SENP8				U2AF1				CCDC126
		ZNF274				CORO1C				TMEM129				ZNF675
		KDM5C				SYNJ2				GNL1				EPM2AIP1
		TTLL13				SUSD6				CCDC40				MID2
		LINC00482				H3-5				THOP1				BRAF
		FAHD2CP				ROBO1				C17ORF99				CRYBG1
		CCDC39				GPATCH11				NSUN5P1				HACD2
		DDX27				MPZL1				PPP1R12C				TMOD3
		ZNF513				EPS15				RPL6				EEA1
		ANKRD10				XIAP				MRPS26				AKT3
		PLCG1				POMK				DHX34				IL1R1
		ZNF407-AS1				MKLN1				VARS2				UBR4
		DPRXP4				PEX26				ATP6V0E2-AS1				ZCWPW2
		HAGHL				SLC29A3				PTPA				KTN1
		RBM33				ITPR1				ZNF787				UTP15
		ZNF141				NF1				NPIPB3				ARL5A
		PAQR6				NT5DC3				SLC35C2				ERCC6L2
		UBE2I				ARFGEF2				KEAP1				EDEM3
		SUGT1P4-STRA6LP-CCDC180				MYO5A				MST1				PHKB
		GGA3				ADAM10				RFC4				ZNF697
		CAMSAP3				GALNT2				MED16				TBC1D8B
		RNF138P1				GALC				GNB2				EHHADH
		ZNF321P				GNG4				RPL30				KMT2C
		ZNF749				NAV2				KAT2A				USP8
		LINC00173				ATP6V1A				RSPH10B2				LINC00472
		SEC16B				TMEM185B				GLYCTK				SLC17A5
		YJU2B				ANKRD17				UROS				NUDT21
		TNFRSF14-AS1				TRIM56				HARS1				MRTFB
		EZH2				DPYS				AKAP17A				ARSJ
		VAMP1				TLR5				KRI1				GPR75
		GRB7				ELF1				PTPRVP				TRIM5
		GOLGA2P5				P2RY12				KLHL25				ARID1A
		IDI2-AS1				TPI1P2				MGMT				ERC1
		ADAT2				CNOT7				NUTM2F				SATB1
		HSPBAP1				BTBD9				DYNLRB1				SMIM13
		SPRN				PARP4				SPAG4				PPM1D
		MRGBP				IMPACT				HCN3				SLC5A8
		CSTF3				PDS5B				ATG16L2				TP53BP2
		N4BP2L2-IT2				TMEM169				EXOSC8				KAT2B
		GRIPAP1				CRIM1				PRR14				PDLIM5
		USP49				PTER				FBXL19				RCBTB2
		TEFM				RUNX1T1				ATAD3A				RHBDD1
		ZC3H3				TRIM35				ZSCAN1				ZNF445
		WIZ				TNKS				RPL36AL				AGO3
		THBS3				CTH				SRSF4				RYBP
		TMC2				SLC30A7				TLE5				GOLPH3L
		CEP170B				RASSF9				ASGR1				STT3B
		LINC02145				ACLY				HMGB2				NCR3LG1
		ULK1				SYT7				TRPM5				CPSF2
		FAM72B				DPY19L3				PTBP1				PSD3
		RNF34				FKBP5				FBXO44				DCAF17
		PNMA5				PCDHAC2				ZNF335				PIGM
		POLM				DCAF7				CARMIL3				TMTC2
		CPLX1				GIGYF2				PSME1				HECW1
		OR13G1				AQR				ATP5PF				ACTR2
		CLK2				IPMK				STAG3				ZNF652
		ZNF692				PCDHGA9				ARIH2OS				RAP1GDS1
		FANCL				TNFRSF19				EPOR				ACER1
		SEC31B				RNF168				BCL7C				PALS1
		SECISBP2				CLCA2				UBAP1L				AFF3
		ANKAR				HMBOX1				BCAS4				IQGAP2
		KIF18B				MXRA5				RAB11B				DARS2
		ARRDC1-AS1				TRPC4				ISY1				KLF3
		GABRR2				ERLEC1				PPAN				PTGER3
		LCN12				LCA5				ELOC				ANKS1A
		MYEF2				ITGB8				FAAP20				COBLL1
		RAD9A				PRKACB				TPRA1				USP30
		SMIM45				TMED2				ACAP1				KANK1
		PACRGL				MAP2K4				MRPL43				SLC30A9
		SNORA63				RCAN3				CLK1				UGCG
		IFITM5				CCK				C4ORF47				STT3A
		CCHCR1				GXYLT2				PODNL1				GPHN
		TRMT10B				PROS1				DALRD3				LPP
		CELF6				SREBF2				DTD1				NBAS
		CXXC1				SEC22B				INTS11				ATRX
		WDR75				GLI3				BTBD6				EIF4EBP2
		KLRA1P				KANK4				SRCIN1				ELP4
		SFSWAP				MAST4				PLCXD1				PRTG
		WHAMMP2				VPS53				MFSD2B				NBN
		PLCB3				SLC5A3				PTMA				PANX1
		ZNF547				ITPR2				NAPA				WASL
		MORN1				QPCT				NDUFB10				MACF1
		GSAP				KAT6A				C1QTNF4				FAN1
		KRTAP5-9				MIGA1				SIGIRR				WWC2
		H2BC7				CMTM6				NDUFV3				DCHS2
		ZNF311				SPTLC3				MRPL18				SEC24D
		WASH8P				RP2				RHPN1				SOS1
		TSC2				ZC3H12C				MOV10				KMT2E
		BNIP2				NLGN3				SNHG20				MDFIC
		ARGFXP2				BCL2L13				SERGEF				EHF
		ZNF707				NANP				OSCAR				NUFIP2
		CPSF7				ELMOD2				ATP5F1E				MBNL2
		ARHGAP4				RSPH3				NPFF				ZDHHC2
		ZNF382				DYNC2H1				DEDD				PTEN
		NDUFAF6				PTPN9				TMEM9				FRMD3
		RSKR				MTUS1				ZNF174				AFF1
		EXOSC10				KDELR3				LEAP2				GTF2A1
		INTS8				FIGN				KRTAP5-1				AGFG1
		COA5				MR1				SEPTIN5				TRIO
		LINC02593				SLITRK6				IFITM3				DENND11
		FAM24B				BTBD8				CD27-AS1				TC2N
		GTPBP3				VPS13D				PILRB				ATXN7L1
		MAU2				ATL3				RCCD1				MATR3
		ARHGAP33				MIEF1				ZNF580				RASSF3
		ZNF721				KIF1B				FITM1				UGGT1
		ZRSR2				GPD1L				UBE2S				AASDH
		HAL				KCTD9				ANAPC11				SEC23B
		SNRPF				FOXO1				WDR46				NBEAL1
		ATG4B				ZNF813				OCIAD2				MTM1
		RNF113B				CTCF				CDK9				GPR107
		FBRSL1				PANK3				EXOSC1				ZBED3
		C5ORF58				SNTB2				ITGA2B				CSNK1A1L
		PAN2				SNX29				EPB41L4A-AS1				HLTF
		NEAT1				M6PR				STX1A				AP1G1
		SNORA24				LRRFIP1				MILIP				ENPP4
		POM121L1P				EIF2AK3				SH3BP5L				SMARCC1
		ABCA15P				RPRD2				TOMM6				RO60
		IFT80				TLR3				AHSA1				GPR180
		TRIM65				TWSG1				AARSD1				GNAI3
		PUS1				EPHX2				NME2				VCPIP1
		SUN1				CSRNP3				COX6B1				DSP
		RBM19				MTMR9				MSH5				TRIM23
		HOXD4				PCNX1				C15ORF40				DOP1B
		SEPTIN7P2				ATF7IP				NTMT1				ARL1
		RCC2				PIFO				NOP56				EXOC5
		ZNF540				SEC31A				CNIH2				SYNPO2
		OGG1				CCDC8				SUMO2				MFSD6
		EOLA1-DT				KDM3B				NOL12				AK3
		PDCD7				HHAT				FPGS				SERINC3
		DNAH1				UBE4A				ANAPC2				FLVCR1
		EXOSC9				ADGRA2				PLAAT3				IKZF5
		PSMC6				CCDC47				SNRPA1				EPDR1
		CUZD1				SLC22A3				CERS5				ZNF347
		ZNF343				CREBL2				NOD1				RC3H1
		NAA16				AVL9				MZF1-AS1				RAB8B
		MSI1				TNRC6B				NUBP1				CHSY1
		TAMM41				ZFYVE9				MCOLN1				PHLPP2
		GOLGA1				THSD7B				PERM1				FBXO8
		TIGD1				TRIP11				AIFM2				RAB3GAP1
		ARIH2				ENTPD5				YBEY				SLC39A14
		USPL1				PHLPP1				TIMM10				EXT2
		NFYC-AS1				ACSS2				MTMR9LP				URB1
		SCNN1D				ADGRG1				TUBA8				DIAPH2
		PVRIG				USP38				PABPC1L				ASCC3
		ZNF80				XPR1				TMPRSS5				STAM
		ACCS				DNAJC6				BRAT1				DIP2C
		NR2C2AP				CLOCK				UBE2C				TCAF1
		PRH2				SLC35A4				DHPS				RNF141
		INO80E				AGO1				MND1				NOS1
		PRPF4B				CDH3				SLC35E4				TBK1
		LSMEM1				GPR155				C19ORF53				BMPR1A
		BTBD16				PRKCE				SURF1				LIN54
		GARIN1A				WDR31				TUBGCP2				VPS26A
		ZNF502				NR3C2				GTF2F1				STAG2
		KCNQ1OT1				SH3RF2				SRRM3				ZNF704
		CCNL2				PHACTR4				RPS15A				MAML2
		CDC42SE1				P2RY13				IRF2BP1				CYP2U1
		C1ORF52				FAM20B				METTL22				COG6
		MIIP				CTR9				MIR9-1HG				ARHGEF12
		TRIM78P				ARHGAP31				AP1G2				GLUD2
		SS18L2				RXRG				RBM42				LARS1
		SNAPC4				UBR1				PAXIP1-DT				LYPLA1
		CLCN2				CILK1				CKLF				DACH1
		POU5F2				GPC4				PLEKHN1				PTPN11
		AP4B1				KDR				TSR2				LNPEP
		TAS2R19				DUSP19				NOPCHAP1				CTDSPL2
		MRRF				AP1S3				BRI3				NAPG
		LUC7L				SOGA1				ATAD3C				TBC1D12
		PMS2CL				WDTC1				C1ORF122				C1QL3
		ZNF76				ABCG2				ST20				DGKH
		HSF2BP				FBXO21				KIFC2				YIPF4
		ALG13				GFPT1				GDPD3				MPP7
		LTB4R2				OGFRL1				MOK				CDK12
		RSRP1				KPNA4				ZNF226				APOL6
		EOLA2-DT				P4HA2				CYP2D7				ASB8
		MYH3				FOXP2				MRPS5				SLC2A13
		PRORSD1P				SCAPER				AGPAT2				SLC16A7
		YY1AP1				DFFA				EMD				KIAA1958
		MAPRE3				FUT1				APH1A				NEDD4
		STPG3				MYD88				SNORA8				ATP8B2
		UNC13D				SMAD2				NAT16				PHF3
		DCDC2B				DOCK9				THAP7				MRPL19
		H4C5				HEATR5A				NPEPL1				DCBLD2
		GATAD1				LPAR3				SOWAHD				ZRANB3
		AVIL				PPARA				ZNF777				PRKAR2A
		RRN3P1				KIAA0408				SLC7A9				RBBP9
		RFX1				METTL14				TMEM190				KLHL23
		GOLGA8A				MN1				FADS3				DICER1
		DPY19L2P4				RALGAPB				RPS12				YTHDF3
		LINC00999				PIAS2				FXYD7				DPP4
		ZEB1-AS1				LY6G6D				ING4				RPL7L1
		RGL3				ATP6V1B2				VPS28				SYT10
		XRCC3				FAM8A1				SPACA4				ARMCX5
		PIP5K1A				CXCR1				STKLD1				ZNF148
		AMY2A				PGRMC1				ZNF71				ZBTB38
		ACRBP				LRRC55				TRAF4				PAFAH1B1
		UNK				PTGER2				CST6				KATNAL1
		CSNK1G2				HECTD1				CD63				TMEM30B
		ZGLP1				CHM				ZNF784				FYCO1
		RAD52				FAM83B				HNRNPAB				KCNA2
		SDHAP1				HS3ST3B1				LINC00937				CAPZA2
		FER1L4				ZNRF2P1				GADD45GIP1				RAPH1
		RWDD3				BMPR2				FEN1				TBC1D5
		HSPA6				MYO9A				ASB6				PCYT1A
		ARHGEF39				NTRK2				JSRP1				THOC2
		DENND4B				MGAT2				TAFA3				CYFIP1
		CPT1B				ATP9A				TSNARE1				TAF1B
		EP400P1				SNX27				ATRIP				MFAP3
		DCST2				DENND10				PSMA7				EXOC6B
		SLC25A29				NHLRC2				ABCA17P				GAN
		TPCN2				KCNS1				RAD54L				ARL5B
		MBD4				SOX5				ELOF1				SOCS6
		CA5BP1				BIRC6				FIGNL2				SGPL1
		TSSK3				OLFM4				PDCL3P4				ARMC1
		ZNF234				SAMHD1				ABCD1				RIC1
		PRR5-ARHGAP8				PTBP3				PLEKHG6				SWAP70
		THOC1				USP46				SMG5				MOSPD2
		KCNC3				SERTAD4				SNHG17				REEP3
		TMUB2				STIM2				FAM32A				PI4KA
		FAR2P1				NFIB				SLC25A6				PRKCI
		HSF4				TMEM38A				RPL18				OSMR
		ZNF296				PIK3CG				CCT6P1				LMBRD1
		TNK2				MDM2				POLR1D				SEMA3A
		AGK				ANOS1				LINC00926				VWA8
		DIPK1B				EIF3A				POU2AF2				BTRC
		CEP83				SPTY2D1				SNHG8				SLC25A16
		NFKBID				CFAP126				EXD3				ABCA1
		RAB11FIP3				PTPRF				MXD3				DDAH1
		CYTH2				EGFR				H2AZ1-DT				ACBD5
		TBC1D3C				KREMEN1				NIT1				SEMA3E
		GPR45				RREB1				TBX19				REST
		REV1				ST13P4				CTDSP1				BPNT2
		UOX				SP1				DNTTIP1				TIPARP
		NAP1L4				ADAMTS15				SDHAP3				MIER3
		GATD1				TNPO1				TMEM116				GMCL1
		N6AMT1				ZNF268				RELA				FNIP1
		TTC32				CLASP1				IRF1-AS1				LRRC58
		NPIPA1				DEFB132				FAM98C				COPA
		NDUFAF7				ITPRID2				COMMD3				EXD2
		HDHD5-AS1				CYSLTR1				LINC00930				MGAT5
		SETD5				PIK3CA				LRWD1				ARFGEF3
		SH3GLB2				TNPO3				MIR600HG				IPO8
		CYP2E1				NKX3-1				PKMYT1				IGSF1
		LINC02897				LEPROTL1				RPS19				PARVA
		TICRR				NECAP1				TSEN34				PHC3
		CLEC18B				FZD5				DUT				WDR43
		MFSD10				MBNL1				LY6H				ATP13A3
		ZNF497				REEP5				OTUD5				MYO5B
		CRTC2				LNPK				LYL1				FEM1B
		SPTBN5				SMAD1				SLC25A19				ACOX1
		ODF2L				TLR7				SPATA2L				CD36
		PCID2				NECTIN3				ZNF34				KIF5B
		TRMT13				CDH1				FBL				USP24
		GTF2H4				ABHD13				METTL25B				KIAA1143
		SUGP1				MYCBP2				PANX2				TENT4B
		ZCCHC3				PDP2				TUSC1				TWF1
		AXDND1				VPS37A				PPP4C				SDR42E1
		RNFT2				CMPK1				SLFNL1				PRKG2
		PARP2				APOOL				LINC02878				NUP153
		POLR3E				TSHZ3				LINC02210				CSDE1
		MC1R				NAT2				GOLGA2P10				DCAF12
		MAP3K10				TGFBRAP1				PKN1				CCSER1
		TBC1D26				LATS1				RHBDF2				MBTPS1
		AHSA2P				ZDHHC20				FDX2				TNFSF15
		CABLES2				FAIM2				MED9				SPRTN
		ANKRD36BP2				MINPP1				NRADDP				SLC12A6
		DPY19L2				PDZD8				CRYGS				RNF180
		MTERF1				PRPF8				TMEM201				KCTD18
		AACSP1				ATF2				AKT1S1				PIK3C3
		RUFY4				ADGRG2				ERF				SOS2
		MDM1				NTN1				SURF6				PAX9
		SSUH2				PLEKHB2				COX6B2				MEF2A
		ZNF436-AS1				SPRR2A				WDR97				USP16
		LENG8				IDI1				COX5B				NDST4
		ZNF599				RPA1				LBX2-AS1				SPOPL
		SNHG7				CCNT1				TMEM121				ANKRD28
		RALGDS				AP3M1				FAM3A				MAGI3
		ZNF630				ZDHHC5				THOC6				ZFP69B
		PMS2P1				COG5				PRDX2				USP10
		FAM118A				ANKRD36BP1				RPL13				DHX33
		SLC26A11				ADGRL3				DGCR6				TMEM161B
		TAF4				KLHL8				SAP30BP				CHD6
		GOLGA8IP				AVPR1A				RRP12				FGD4
		U2AF1				RIMOC1				ACBD4				SGCB
		WRAP73				TMEM167A				NDUFB2-AS1				DYNC1LI2
		OSGEPL1				IPO7				SIRT3				NPAT
		NXF1				PCM1				SPSB3				ZNF81
		ARMC12				CAMSAP2				TMEM198				GPATCH2L
		TBP				RFC1				PIN4P1				CCDC186
		PPP1R26				GTF3C4				DMAP1				GPRASP2
		CCDC40				NCOR1				IFI35				PRKD3
		ZNF195				IQSEC1				SLC39A3				SWT1
		CREBZF				SHISA9				DDX51				RAB11FIP2
		MTBP				SPATA18				HEXIM2				PAXIP1-AS2
		TUBB3				HPDL				ADAMTS13				NRIP1
		ASB16				FUT11				AZIN2				N4BP2
		NSUN5P1				PPP1CB				TUBG2				ZNF318
		VAV2				LTF				CBLN3				ZNF609
		MSANTD1				CYBB				ZNF517				FAM135A
		ERCC3				ERBIN				DNASE1L2				NACC2
		DHX34				PAFAH1B2				LIN37				ITGA1
		VARS2				MPZL3				WDR5				EPHA5
		LINC02800				TUBGCP4				FAAP100				ERMP1
		TMEM80				RGS22				TIMM44				ARID5B
		COX19				GSPT1				ROM1				TCF12
		SNORD116-28				FER				DGCR6L				HACE1
		PRKAG2				MOB1A				DPEP2				ATP7A
		PRPF38B				TMEM131				SLC29A2				ERAP1
		ASMTL-AS1				SORD				PRELID1				CCNG2
		GRB14				SGMS2				MRPL21				ITSN2
		ILF3				CNTNAP2				MPP3				ADGRL2
		NPIPB3				RABEP1				TLR9				ODR4
		SPDYE6				TRIM44				HLA-DMA				TENM2
		MST1				FRK				AMN				PRRG4
		LINC02908				INSYN2B				GPR137				NCEH1
		RFC4				SIDT2				INAFM1				ARMC8
		MIAT				PI4K2B				CIZ1				BBS10
		RPL30				TMEM231				UBXN6				DSG2
		CCDC30				HIF1A				PHF13				AEBP2
		ZNF621				SMIM14				MARK4				VPS36
		KAT2A				MCC				CTU1				PRDM4
		UCKL1-AS1				RNF111				CIB1				HSPA4
		RSPH10B2				CYP51A1				CBY1				PAPPA
		AKAP17A				TGFA				HAVCR1P1				DHX40
		C10ORF88B				SEMA4G				MBD3				EVI5
		PTPRVP				KBTBD4				MTRFR				SMC1A
		KRI1				ATXN1L				TLE6				VPS41
		CHKA				ARHGAP5				RPL41				DSC2
		NUTM2F				CDC73				DRAP1				MPV17L
		POLQ				MINDY2				ZNF575				ANTXR2
		HCN3				PLXNB2				NFKBIE				ZNF407
		ANKRD9				PADI2				NIT2				PPIG
		MST1L				SLC35D1				CLEC18A				GPALPP1
		ATG16L2				ILDR1				FLOT1				PEX1
		STAG3L3				STXBP4				NDUFA3				ASB3
		IQCB1				CYLD				BRME1				PRKAA1
		EXOSC8				PSKH1				CHST5				NIBAN1
		HNRNPH3				MRGPRE				LYRM4				CASD1
		FOXD4L4				CLCN3				GPANK1				IL1RL1
		KMT5C				METTL24				SLC25A28				ENAH
		CCDC62				EIF4E3				MAPK15				HSPA4L
		IFRD1				LRRC8B				SHARPIN				TTBK2
		PRR14				LRP12				TIMM13				PLXNC1
		ZNF696				CSNK1G1				CDC34				TAFA4
		CEP43				MBNL3				TMEM150A				ATP2C1
		FBXL19				KIF13A				ECHDC2				LIPH
		ATG9B				SDC3				CIRBP				RASEF
		ADCY10				LRRN3				ZC3H10				RNF103
		ZRANB2				KLHDC10				CATSPER2				NRAS
		TRIP13				PLEKHA2				PLEKHA4				TSHZ2
		CEP95				DPP8				LYSMD1				CROT
		DOT1L				ACER2				RP9P				ESRRG
		NEB				KIF13B				MYPOP				PPTC7
		SRSF4				PEG3				WDR18				SLC12A2
		CCDC93				ATP6AP2				HEMK1				CSTF2T
		TROAP				SLC35C1				AURKC				DNAJC3
		HMGB2				SUFU				SCRIB				DYM
		PDXDC2P-NPIPB14P				HMGCLL1				PHETA1				TRIM37
		CORO6				SEZ6L				UNC119				METTL15
		PTBP1				RSPRY1				HPX				IREB2
		BRD1				HCG11				EIF3K				STOX2
		CMAHP				GLB1L3				RNF130				ZW10
		FBXO44				ARG2				CPSF4				ABCC4
		ZNF335				BACH1				MLXIPL				PBRM1
		CARMIL3				DOCK5				ULK3				FBXO33
		CASKIN1				TM9SF3				PIP5KL1				UHMK1
		TAS2R14				ALDH1A3				WDR86				SSR3
		FAM131A				PTAFR				CFAP90				PPP4R3B
		FBXO43				REL				ANTKMT				ELOVL7
		STAG3				CREBRF				PPIE				MAGT1
		RPL13AP6				OR51E2				OCM				BICRAL
		EPOR				TM7SF3				ARRDC1				RNF20
		KCNJ14				INSR				PGLS				USP9X
		INTS3				CARNMT1				TMEM141				PCLO
		ZNF558				CRACR2A				BUD23				ZNF778
		LTB4R				HHIP				OAZ1				MTF1
		H2AC15				SLC45A3				EXOC3L1				FAM169A
		UBAP1L				SLC35A3				CIDECP1				RNF2
		CCDC142				DAGLA				IL11				NR3C1
		FAM186A				FERMT1				FOXD4				PIK3C2A
		SUGT1P3				BAG4				HDGF				NEK7
		SF1				ABRAXAS1				GKAP1				PARP11
		TMEM14EP				SLC38A1				AKR1C3				RPEL1
		LSM7				RGP1				YKT6				HUWE1
		FAM200B				RBBP5				BOLA1				EMP1
		B3GAT2				SLC7A1				PAF1				AGO4
		PPAN				DENND4C				IL20RB				COG2
		LINC01588				KDM1B				RABL2A				ZC3HAV1
		UBE2G2				MORC4				ZNF579				ARHGAP28
		COPS7B				FAM168A				FAM209B				OXCT1
		PLIN1				APH1B				PPFIA4				LEPR
		CNEP1R1				GPD2				PLEKHM2				SH3BGRL
		CLK1				BTBD7				CTSZ				AASDHPPT
		DDX55				NCMAP				ZNF266				MTOR
		SPINDOC				VANGL1				VTI1B				SV2B
		C4ORF47				KLHL42				TBCD				USP13
		ZNF333				QSER1				APOA1				ZNF585B
		TMEM86B				PITPNM3				EEIG1				LEPROT
		GCNA				TOR1AIP2				CRYBB2				STK38L
		KATNBL1				PPP1R11				BRD3OS				DYNLL2
		INTS11				PIGO				FTCD				PRR14L
		C20ORF203				NCOA2				DCTN2				RALGAPA2
		ASB16-AS1				N4BP1				URAHP				SATB2
		TUBE1				CANX				IFT20				SLC9A7
		LINC00319				SOSTDC1				DDX12P				CDK6
		H4C9				LCP1				CDKN2A				RAB27B
		SRCIN1				FAXDC2				GSDMD				KLLN
		TIGD7				PRKCH				CARMIL2				MORC3
		PLCXD1				LZIC				TTLL10				ZXDA
		ACYP1				UBIAD1				SSBP1				TMEM132C
		PPT2				FAM210B				ZNF341				TMTC3
		CLUHP3				FAM217B				TMEM31				PRKAB2
		PHRF1				SLC34A2				NAGK				AFF4
		SNHG3				TRAK1				C19ORF25				AKAP10
		IQCN				RNF125				TMEM101				TTLL7
		ZNF140				USP12				TOMM7				EFCAB14
		BRD9				DMD				TREX1				LYST
		TSPOAP1				SHROOM2				PRRT2				SPOCK3
		OPLAH				COL6A3				DMAC1				ZNF281
		OGT				PREPL				CLPP				SMARCA5
		RNF207				DOC2B				PAM16				PLEKHA3
		CCDC154				RABGAP1L				ANP32B				FRMD6
		RHPN1				FAM107A				HNRNPL				PLS1
		RPIA				NMT1				RUNDC3A				SNX4
		ODF2				FAM114A1				GAD1				LMBRD2
		AARS2				ORM2				MPG				SYNRG
		TREX2				LDLRAD1				ZNF133				ARPP19
		MOV10				CDCP1				SH2D5				RIF1
		NBEAL2				MANSC1				TIGD5				COPS2
		EFCAB10				ELAPOR1				RPL26L1				ZNF516
		SNHG20				YAP1				IQCC				DBT
		MEN1				TCP11L2				CUTA				SRBD1
		FASTKD3				SNX12				ATP6V1B1				PPP1R3B
		ANKRD16				LRP4				WHRN				CGGBP1
		TRABD				FNDC3B				PCGF1				SAMD8
		NPFF				GPR63				CALML6				NEU3
		PRPF4				SMIM15				TAS2R20				ITGAV
		NPHP4				ZNF28				RMI2				CCDC158
		CLDN15				ARL15				IDH3B				NAA50
		ZNF174				MANBA				PINX1				ZNF221
		ITGB1BP1				ATRNL1				EIF3G				TMEM209
		TAF1A				AREL1				ARHGAP22				TMEM35A
		LEAP2				SLC27A2				MROH1				KIF21A
		KRTAP5-1				CPE				CRACR2B				ABCE1
		SEPTIN5				SEMA5A				H2AC20				EXOC8
		CD27-AS1				PTPRU				ZNF600				PDPR
		PILRB				NIPAL1				TTC16				REV3L
		GPATCH1				ST6GAL1				B3GAT3				PHKA1
		RCCD1				NLGN4Y				RASSF1				B4GALT6
		ZNF580				KLHL11				URM1				PRKAR1A
		AGBL3				SLC24A3				NSUN5P2				ZRANB1
		ZNF276				TMEM254				PISD				EGLN1
		RBCK1				RLIM				MTERF2				PEX13
		ZDHHC8				KITLG				MRPL53				BAGE2
		GPR179				PYGO1				CENPM				SGTB
		VCPKMT				C2ORF69				C12ORF57				XKR5
		DVL3				TMEM192				MIGA2				CACUL1
		KRIT1				RAD54L2				POU5F1B				CHUK
		TTC31				PPP2R5E				PPIAL4G				PDPK1
		TRIM67				SFT2D2				MNX1				STAT3
		CDK9				BLTP2				MS4A14				PPP2R5C
		SNX29P2				CEACAM1				EEF1G				DCAF1
		PSMG3				RNF11				TMEM270				SLC38A2
		ITGA2B				DCC				H1-10-AS1				SYNJ2
		STX1A				EIF4G2				CDK10				GPN3
		SH3BP5L				GTF3C1				FCHSD1				WDR36
		CABP4				FHIP1A				HLX				CD2AP
		CCNL1				CCDC89				UBE2J2				ARSB
		USP6				VAMP7				GNL2				MYH10
		DDX12B				GABARAPL3				PFDN2				ADAM9
		SDHAP4				PRICKLE1				PRR3				DDX52
		TMPRSS9				ZNFX1				DPCD				APAF1
		ZNF732				SLIT2				RANGAP1				CYP7B1
		CDCA3				MFSD14A				NDUFB9				STXBP5
		SPATA25				LIN7C				CHKB-CPT1B				NEK1
		CPSF1				HACD4				TRIM50				POMK
		METAP1D				PSME3				BORCS8				DENND4A
		LIME1				GALNT1				RXRB				USP25
		ZNF491				PTCHD1				UQCC4				POGLUT3
		GPR137C				SBNO1				C17ORF67				ITPR1
		MSH5				PARD3B				EIF2B5				PCNX4
		PPEF1				DNER				POLR2G				PCYOX1
		PCDHGB8P				B4GALT5				PSTPIP1				CAP1
		MTG2				RTL6				APOL2				NSL1
		LINC00899				RASGRF2				PDHA1				GFM1
		BMS1P4				VPS13C				INPP5E				KBTBD11
		CNIH2				PDIA4				PMPCA				SHPRH
		ANKRD19P				TTC9				DDT				AP5M1
		RPS10P7				MCPH1				HSD17B1				STX7
		TEX44				RETSAT				H3-3A				IRAK3
		NOL12				CAST				HSD17B10				MYO5A
		ANAPC2				FBXL4				GAS5				ZC3HAV1L
		MZF1-AS1				VTA1				PPP1R14A				ADAM10
		PIWIL4				FBXO32				OR2B6				GALC
		CDK5RAP1				MYO1D				ATP13A1				LIPA
		ZNF354B				PPARGC1B				DAZAP1				OXR1
		MMP21				RBM43				B9D1				PAK3
		GAL3ST2				AR				GZMM				DPYS
		PCF11				BMP2K				LYG1				HK1
		CCDC191				PLEKHA6				DDX11				SFMBT2
		MED17				KDSR				NSMCE4A				LRPPRC
		MBD6				AP4E1				IMP4				PDS5B
		MTMR9LP				TAOK1				ZSCAN9				CRIM1
		ZNF23				CRYBG1				ANKRD13B				DHTKD1
		PCSK4				HACD2				IZUMO4				PTER
		PACSIN1				STUM				CCDC88B				ZNF644
		PABPC1L				TIFA				ARRDC2				MPHOSPH8
		COL28A1				GCNT1				ARL2				TNKS
		TMPRSS5				TMOD3				CD2BP2				SNX2
		BRAT1				ST8SIA6				NDUFAB1				ACO1
		NAT9				NCOA4				BAK1				CTH
		FNBP4				DAAM1				COX6C				TULP4
		UBE2C				FCHO2				NSMCE2				TSNAX
		SKOR1				KAT7				BBC3				MEGF9
		SRSF10				MIB1				MIR4435-2HG				SLC30A4
		TSEN2				USP8				RAB40B				GARRE1
		AP1G2				HIPK1				MRPL38				TECPR2
		DCAF15				INSIG1				RPS5				ATM
		PAXIP1-DT				XPO7				PI4KB				PLEKHA1
		MYO19				ARSJ				NOC4L				PRRC2C
		ARHGAP27P1				FMN2				BET1L				TAF1L
		PLEKHN1				KAT6B				PUF60				LTN1
		SEMA6C				EVX2				SPPL2B				PGM5P2
		ZFC3H1				ARMCX2				FAM209A				LIG4
		HNRNPDL				PAK2				ZNF48				BLTP1
		DDIT3				RPS6KA3				CACTIN				DCAF7
		GPR152				WASF2				USE1				TMED5
		HPN-AS1				KBTBD7				HCST				AQR
		MCM9				USP27X				NASP				NDFIP2
		KIFC2				STT3B				CDK11A				IPMK
		DOK3				ATRN				SRRM2-AS1				PCDHGA9
		ENY2				HECW1				RPL35				MINDY3
		ZNF302				CNOT6L				TBL3				RNF168
		GDPD3				ACTR2				COPS9				USP45
		MOK				ZNF652				CLTA				NAPEPLD
		ZNF226				PABIR1				TMEM240				CRYBG3
		CYP2D7				SPOCK1				CCDC106				ZNF134
		CCDC144CP				KCTD14				TOP1P2				GALNT7
		ZNF773		Firehose Legacy	26	KARS1				MACROD1				RNF115
		SNORA8				ANAPC13				SIX5				MAN2A1
		PRSS50				NUCB1				NT5M				CLMN
		NAT16				MT1M				SCX				GOLGA5
		LINC00852				PGM5-AS1				RHOC				MTREX
		VHLL				UQCRFS1				BIRC5				UBXN2B
		NPEPL1				DSE				ZBED10P				MTMR10
		ALDH8A1				CTSD				CARNS1				RBL2
		XPO1				SGCG				NIBAN3				OR51T1
		LRRC74B				NLRX1				OXLD1				ERLEC1
		ZNF300				INTS5				ZFTRAF1				LCA5
		LENEP				VAC14				ATP5MC1				CD46
		ZNF449				CYB5R1				MRPL52				USP53
		SLC7A9				ABCF1				TMEM250				TMED2
		SMC1B				SLC25A11				SPIRE2				RCAN3
		FADS3				GRN				CCDC124				PRUNE2
		HOOK2				MSRA				ALKBH2				KY
		MGME1				MYL9				ARHGAP39				SMAD4
		ZNF841				KIAA2013				MGAT4B				SLC4A7
		AMH				USP5				PLEKHO1				SGMS1
		PFDN6				PPP1R1A				MIB2				JCAD
		RPAIN				HADHA				EXOSC2				RIOK3
		PDZK1P1				MFAP1				RING1				SEC22B
		SRSF1				MFSD5				FGF17				TP53BP1
		STKLD1				GMDS				CCDC57				NEDD1
		NCBP2				CHPF				LAMTOR2				EPC1
		UBE2E1		PanCancer Atlas	12	HSPB6				GIMAP1				NFIC
		DNAJC2				FHL1				RIBC1				DDX46
		LINC00937				KCNMB1				DAPK3				ITPR2
		ASB6				NEGR1				PPP2R3B				KAT6A
		CAPRIN2				NT5E				ZNF598				EPRS1
		PARP10				FERMT2				TEX38				MIGA1
		SF3B1				SRARP				PIN1				GRIA3
		CSAD				GIPC2				MAPK12				NSUN3
		STAG3L1				FGF7				SIPA1				CMTM6
		TSNARE1				LINC00654				NELFE				PNPLA8
		DBF4B				NEXN				NDUFA8				C1QTNF9
		TTF1				MYLK3				NPW				GOPC
		ABCA17P								LLGL2				RP2
		RAD54L								ZSCAN16				MLLT3
		FIGNL2								PCBP4				GOSR1
		PDCL3P4								NFKB2				NANP
		TTC21A								FAM167B				ELMOD2
		ZNF256								RPLP1				NIPAL2
		SSPOP								ZNF75A				C7
		CLK2P1								SH2B2				WASF3
		SNHG17								MAFK				CSNK1A1
		SMG5								PSMD3				DYNC2H1
		RANBP17								TMEM151B				LONP2
		LINC00205								GPD1				MTUS1
		CCT6P1								TSR3				CCNC
		LRRC37A3								DNMT3B				MFSD1
		TMEM138								SDHAP2				TMED10P1
		LINC00926								GATD3				LEMD3
		PROB1								PEX11G				PUS7L
		POU2AF2								GUCA1B				SLC6A14
		U2AF1L4								GHRL				SOAT1
		EXD3								EFHC1				CPPED1
		MXD3								PPFIA3				TXNDC16
		TMEM234								ESRRA				SLITRK6
		H2AZ1-DT								IRF3				PRRC1
		RCE1								MRPS12				DIS3
		NIT1								TAF10				VPS13D
		TBX19								GMFG				ATL3
		SDHAP3								LCDR				F8
		TMEM116								NDUFA2				KPNA5
		TRAF1								ZMAT5				MIEF1
		IRF1-AS1								MIOX				TCAIM
		NBPF11								ACOT7				ZNF292
		LINC00930								PSMC3IP				FREM2
		MIR600HG								ATAD3B				ZNF829
		ELF2								ENDOG				C6ORF120
		BANP								ZNF467				RAPGEF4
		DUT								HES7				KCTD9
		LINC01002								APRG1				WDFY1
		PRKY								RPL32				ZNF813
		ADCY6								POU6F1				CTCF
		OGFR								C9ORF163				SNTB2
		PANX2								CFAP298				PABPC4L
		SNHG10								TEN1				AMIGO1
		CATSPER3								WDR62				FUT10
		ZNF273								C11ORF24				KPNA1
		SLFNL1								LEMD2				MARCHF7
		LINC02878								ATP5PD				ANKRD31
		NPIPB13								ODAD3				CLASP2
		LINC02210								NDUFC1				CLTC
		NFATC2IP								NGDN				EIF2AK3
		GOLGA2P10								CEL				RSBN1L
		TTLL3								MARK3				GABPA
		TMEM249								SAC3D1				RPRD2
		SCML1								POM121L10P				TLR3
		PYY2								DPF2				ZNF260
		CRYGS								PHF1				GALNT4
		NRADDP								CXORF65				CPED1
		USF1								PNPLA6				TLCD4
		COX6B2								C6ORF52				PSME4
		ZNF205								AAMDC				EPHX2
		SURF6								SCARNA12				PTGR3
		MLLT10								CDH24				USP37
		NDUFAF5								GGA1				PTAR1
		WDR97								SHFL				KIF3B
		THOC6								LOC730668				ZMAT3
		GPC2								ZNF7				CSRNP3
		SALL4								LOXL1				KRBA2
		GARIN5B								ALYREF				ANGPT1
		ZCCHC8								ZNF672				MED23
		SUPT20H								TAB1				MTMR9
		ARHGEF1								NT5C3B				PCNX1
		ACBD4								SULT1A2				CPT2
		NDUFB2-AS1								FAM83H				LMTK2
		SPSB3								ARHGEF16				ATF7IP
		SYCP2								STRC				SEC31A
		THUMPD2								RPL10				NAA35
		PIN4P1								GDF9				VPS8
		DMAP1								PFKL				KDM3B
		VN1R1								MMP23B				KANSL1L
		ACIN1								MITD1				ETF1
		SRSF2								SNHG9				MTX3
		CNKSR1								AURKB				TOPORS
		SUGP2								GABBR1				ZMYM1
		PRELID3A								LSM3				UBE4A
		TSSK4								NPPA				TMEM100
		PI4KAP2								ZFP41				ZCCHC14
		ADAMTS13								CARD14				CREBL2
		AZIN2								TP53I13				SEL1L
		MSTN								CLDN9				FAM227B
		HAUS5								RASSF4				ZNF429
		ZC3H11A								SLC17A9				YWHAB
		IMPG1								PLA2G6				ENTPD5
		CBLN3								MRPS28				TRAPPC13
		TCF3								TDRD10				PHLPP1
		ZNF517								FTH1				LYPD6
		DNASE1L2								PAFAH1B3				NARS1
		LIN37								NPRL2				DHX9
		ZNF587								BCKDK				SLC7A2
		WDR5								BOD1				NCKAP1
		NVL								AFG3L1P				WDR47
		CYP2C8								POC1A				KCTD20
		LTO1								RILPL1				XPR1
		ATAT1								SIRT2				PKN2
		FAAP100								DDX39A				FERMT2
		PRPF38A								FANCA				PRPF40A
		MLH3								PHYKPL				DNAJC6
		ATP6V1C2								IKBKG				CLOCK
		EWSR1								SPOUT1				AGO1
		SLC29A2								CRYBB3				CLDN12
		ALMS1P1								ANO9				PRKCE
		DTX2P1-UPK3BP1-PMS2P11								SEC13				LGALSL
		IFT81								HAGH				PGM2
		RBMX								GNRH1				ROCK1
		MPP3								FOXD4L6				WDR31
		SNORA71E								ERCC1				ZC3H13
		PHF13								GTF3C5				CNTN3
		LMTK3								RASA4CP				CREB3L2
		ZNF700								TAFAZZIN				PHACTR4
		MARK4								PARK7				GAPVD1
		CTU1								AP4M1				TAX1BP1
		HAVCR1P1								IFT43				C6ORF89
		TTC23L								LRRC56				WASHC4
		ZNF337								UBALD1				GFM2
		ALS2CL								RABGEF1				ZBTB37
		MEG3								CACFD1				GNL3L
		BCCIP								SIGLEC16				GTPBP8
		CIT								AURKAIP1				PRKAA2
		ZNF607								LINC00240				PIK3R4
		HTRA2								DPP7				CILK1
		SNORD10								PPOX				DUSP19
		ILKAP								MST1P2				RGPD4
		ERAS								MRPL20-AS1				VEZF1
		PTBP2								NSMF				BTBD3
		SCAND2P								C1ORF35				TBC1D4
		AMY2B								DGAT1				GLUD1
		CLEC18A								GABPB1-AS1				ABCG2
		OGA								ABHD17A				FBXO21
		ME3								KANK3				FAM13C
		CCDC146								C1ORF174				SREK1IP1
		FAM227A								MED25				ASXL3
		FAM221A								MSANTD3				PHIP
		HNRNPA3								CENATAC				PRDX3
		CORO7								HYPK				RFWD3
		NRBP2								IGFLR1				RBM12
		IDUA								ZNF593				SLC11A2
		CCDC150								ASPSCR1				SCAPER
		MAPK15								RANBP1				EDIL3
		CHERP								CSNK2B				NUP98
		PDZK1								SLC25A34				HSPA13
		ZNF443								REXO1				DFFA
		MTRF1								RASAL3				VPS26C
		INTS6L								DYNC2I2				ARHGEF37
		ECHDC2								COX7B				LATS2
		CIRBP								TRAPPC5				SCYL2
		SEPHS1P1								ZNF362				DOCK9
		SGSM2								C11ORF80				TYW3
		NUTM2A-AS1								TGIF2				DLG2
		CAPN10								INCA1				SESN3
		CATSPER2								LINC00174				CC2D2A
		LYSMD1								MTLN				SLU7
		VEGFD								GFUS				SOCS7
		PPP1R35								NKAP				DAB2
		E2F6								RIC8A				WDR11
		KLHL17								IL4I1				SACS
		HEMK1								SGK2				LRP6
		PGBD2								LRRC61				AFF2
		LINC00265								SMCO4				ZYG11B
		RNF149								LRCH4				PPARA
		RSRC2								EXOSC3				NCKAP5
		SCRIB								AGAP4				ZDHHC15
		EFCAB13								CHTF18				RORA
		ZNF77								PPP1R32				PIAS2
		SNORA52								POP7				DENND2C
		HPX								MVD				SHISA6
		MALAT1								ZFPL1				NSF
		IFT25								IK				BLTP3A
		ULK3								NACA				CDYL2
		SELENOO								BCS1L				ARHGAP18
		ORC6								CDK4				NUS1
		GAS8-AS1								TCF15				PTPRN2
		MICALL2								SPSB2				CHM
		SS18L1								PRMT1				RANBP3L
		SLC16A8								ITIH3				ATP1A2
		SREK1								RHOV				BACE1
		GTF2IRD1								CLN6				TVP23B
		EEF1AKMT2								KAT8				ACADSB
		RUSC1-AS1								SRRT				STX17
		TUBGCP6								APTX				SERINC5
		MORC2								SNRPG				ZNF619
		TPTEP2								RBM3				HERPUD1
		ZNF282								RPL17				SKIC3
		ZNF222								H1-10				INPP4B
		PRDM15								RAPSN				BMPR2
		DSN1								FAM53A				ZFP91
		SLC26A10P								LRRC45				B3GALNT1
		NBPF9								ADCK2				KLF7
		IL11								MIX23				GDAP2
		FOXD4								PRSS27				MAPK6
		SUMO4								NFE2L3P2				BTC
		GKAP1								KCNMB3				MGAT2
		WASH3P								FRS3				PLCB1
		FAM193B								HCG27				HIVEP2
		NTN5								TMC6				CPEB2
		KDM5D								SF3B2				BPTF
		RNF19A								FLYWCH2				TASOR2
		ZNF326								GAL3ST1				NPEPPS
		FASTKD1								CDR2L				SLC2A12
		RABL2A								RAB25				CUL5
		PPFIA4								PPP1R14D				HACD3
		ZNF112								KIF9				SNX27
		STX16								UXT				SENP2
		ZNF266								DCUN1D2				CHTF8
		TRIT1								TGFB1				JKAMP
		LRP2BP								MRPL11				DENND10
		ZNF250								SCARF2				NUBPL
		TATDN1								ARPC1A				TAF13
		HES4								ZNF530				SOX5
		CEP44								C9ORF50				PCGF5
		TEX56P								RUFY1				PRKG1
		ZBTB5								MYG1				WIPF2
		SRSF5								RPS4Y1				PLXDC2
		TSNAXIP1								TMEM259				SBF2
		ANP32A-IT1								PTGIR				ZNF699
		CLNS1A								PFN4				GOLM2
		NUP43								RPS24				SEPSECS
		URAHP								UCK1				UBL3
		HNRNPA1P33								MIA				CYP20A1
		REX1BD								MRPL9				DIP2B
		NME3								RPL24				AK4
		CYP4F30P								SDHAF1				PIK3CG
		FAM200C								ABT1				CAPRIN1
		DDX12P								SNORA50C				ANOS1
		PVT1								PPP1R3F				NLN
		EBLN2								RAB4B				TPP1
		ARL17A								MBLAC1				CFAP126
		TTLL10								FAM228B				RREB1
		MALSU1								ARL8A				LRCH2
		METTL3								GPT				LIFR
		SUPT7L								C12ORF76				ENPP5
		C19ORF18								ALKBH7				SNAP23
		ZNF341								NNMT				CBL
		LRRC37A								RHBDL1				SP1
		SEC14L1P1								B9D2				TOX4
		TMEM31								PTTG1				DENND1B
		C2ORF68								ERGIC3				ZBTB33
		YTHDC1								NME4				ZBTB1
		ATAD5								TNFRSF25				MGA
		ATOH7								CDCA5				SPTLC2
		KRBOX4								UBE2T				DEFB132
		POM121								CWC25				TTC28
		PRRT2								MICOS13				PIK3CA
		PNN								GOLGA2P7				TNPO3
		PAM16								RECQL5				MAP3K2
		ZBTB49								PROCA1				ANKRD13C
		ZGPAT								C6ORF163				CEP97
		HNRNPL								HSD17B7P2				NBPF10
		ZNF133								TEPSIN				JMY
		GLI4								PHB1				UBA6
		TIGD5								ZNF862				TRAPPC8
		IQCC								SLC26A6				RAB3B
		ATP6V1B1								FN3K				ZNF451
		WHRN								LINGO3				CLINT1
		PCGF1								PPP1CA				DCUN1D1
		LRRD1								FKBP8				MBNL1
		CALML6								COX6A1				STX12
		TAS2R20								MMP11				ZKSCAN8
		LRRC14								CCDC74A				ZNF844
		WHAMMP3								HEXD				NIN
		MSANTD2								DUSP23				RPL23AP53
		SCNM1								LRFN4				SRPK2
		NEK3								RAB24				PLCL1
		MROH1								CARHSP1				ABI1
		ATG14								SHC2				NECTIN3
		ZNF600								CCDC174				SLC1A1
		TTC16								DOC2A				NUP58
		MDH1B								CCDC107				HOMER1
		ARHGAP27								ZNF767P				CDH1
		MAT2A								COPS6				CALU
		SIN3B								DBP				KIAA1671
		NSUN5P2								PSMD9				ANKFY1
		MTERF2								RHOD				IQGAP1
		RNF44								EGFL8				MYCBP2
		STARD7-AS1								KMT2E-AS1				COX18
		UBE2Q2P1								SIRT7				LINC00654
		MIGA2								SLC25A2				ENTPD4
		POU5F1B								PKIG				PAFAH2
		TMA7								INO80B				SLC18A2
		MS4A14								PDIA2				WDR35
		H1-10-AS1								IP6K2				LATS1
		CDK10								HNRNPD				GNAQ
		ANKRD23								RPLP0				GNPNAT1
		PPWD1								U2AF2				SECISBP2L
		MDM4								CCS				PDZD8
		PTCH2								FCGRT				CCNG1
		TRMU								PPIH				NEMF
		GNL2								C15ORF61				FGF2
		FLRT1								MTFR2				PEX3
		HDAC6								ZMYND19				MED1
		PFDN2								PRKCZ				ATG4C
		ZNF200								EIF2B4				TET2
		FTX								TSSC4				EPG5
		PRR3								COL11A2				ABCB10
		CYP2R1								NCBP2AS2				TMEM245
		CHKB-CPT1B								AMY1A				ENDOD1
		TRIM50								PALM				RPA1
		H2BC17								FAM86C2P				CNTNAP3
		GOLGA8B								RPS6				RAB29
		SPEF2								MZT2B				FNDC3A
		DCAF8								HMGN2				AP3M1
		FAM166A								ROMO1				CEP76
		PTMAP11								TTC36				IFT70A
		ZNF833P								MRM1				COG5
		RXRB								HSD17B3				COMMD10
[truncated: 2,637 more rows]
