# Supplementary material for: Implications of the KHDC4-TRAF2 axis in the context of prostate cancer prognosis
Source: Aging (Albany NY). 2025 Jun 23;17(6):1544–70. doi: 10.18632/aging.206273 (PMC12245195; doi:10.18632/aging.206273)
Supplement: Supplementary Table 8 [file aging-17-206273-s009.xlsx]

## Sheet: Supplementary Table 8
Supplementary Table 8. Gene ontology list of potential impacts of KHDC and TRAF2 in TCGA-PRAD transcriptome profiles.
KHDC4-mediated Gene Ontology
Ingenuity Canonical Pathways	-log(p-value)	Molecules
Endoplasmic Reticulum Stress Pathway	2.1	DDIT3,DNAJC3,MBTPS1,MBTPS2,TRAF2,XBP1
Unfolded protein response	1.59	AMFR,DDIT3,DNAJB7,DNAJC3,DNAJC9,HSPA6,MBTPS1,MBTPS2,OS9,PDIA2,PDIA6,SEL1L,TRAF2,XBP1
April Mediated Signaling	1.14	IKBKB,MAPK1,MAPK12,NFATC3,NFKBID,TRAF1,TRAF2
4-1BB Signaling in T Lymphocytes	1.13	IKBKB,MAPK1,MAPK12,NFKBID,TRAF1,TRAF2
B Cell Activating Factor Signaling	1.09	IKBKB,MAPK1,MAPK12,NFATC3,NFKBID,TRAF1,TRAF2
TWEAK Signaling	0.987	IKBKB,NAIP,NFKBID,TNFRSF25,TRAF1,TRAF2
Induction of Apoptosis by HIV1	0.934	BCL2L1,DFFB,HTRA2,IKBKB,MAPK12,NAIP,NFKBID,TRAF1,TRAF2
Deubiquitination	0.903	ACTR5,ARRB1,ASXL1,AXIN1,CCNA2,CCP110,H2AC21,H2BC17,H2BC18,INO80B,INO80E,KAT2A,MBD6,MDM4,MUL1,NFRKB,OGT,OTUD3,PSMC6,PSMD1,RCE1,RHOA,RNF146,SEM1,TRAF2,UIMC1,USP20,USP49,YOD1
TNF signaling	0.899	IKBKB,MIB2,RBCK1,RNF31,SPPL2B,TRAF1,TRAF2,ULK1
Death Receptor Signaling	0.86	ACIN1,ACTC1,ACTG2,DFFB,HTRA2,IKBKB,NAIP,NFKBID,PARP10,PARP2,TNFRSF25,TRAF2
TNFR2 Signaling	0.833	IKBKB,NAIP,NFKBID,TRAF1,TRAF2
Small Cell Lung Cancer Signaling	0.813	BCL2L1,CCNE2,CDK2,E2F6,HDAC10,HDAC6,HDAC7,IKBKB,NFKBID,RXRB,TRAF1,TRAF2
TAK1-dependent IKK and NF-kappa-B activation	0.725	AGER,APP,HMGB1,IKBKB,LRRC14,TRAF2
14-3-3-mediated Signaling	0.456	ERAS,MAPK1,MAPK12,PLCB3,PLCG1,PLCL1,PRKCB,STK11,TRAF2,TSC1,TSC2,TUBB3,YWHAB
Role of RIG1-like Receptors in Antiviral Innate Immunity	0.417	IKBKB,IRF3,IRF7,NFKBID,TRAF2
CD27 Signaling in Lymphocytes	0.41	BCL2L1,IKBKB,MAP3K10,MAPK12,NFKBID,TRAF2
TRAF2-mediated Gene Ontology
Ingenuity Canonical Pathways	-log(p-value)	Molecules
Deubiquitination	7.3	ABRAXAS1,ABRAXAS2,ACTR5,ACTR8,ADRM1,APC,AR,ASXL2,AXIN1,BABAM1,BAP1,BRCC3,CDC20,CYLD,EP300,FKBP8,FOXK2,H2AC20,HGS,HIF1A,IDE,IKBKG,INO80B,INO80E,JOSD2,KAT2A,KAT2B,KEAP1,MBD5,MCRS1,MDM2,MYSM1,NEDD8,NOD1,OTUD7B,PSMA6,PSMA7,PSMB1,PSMB10,PSMB2,PSMB3,PSMB4,PSMB7,PSMC1,PSMC3,PSMC5,PSMD13,PSMD3,PSMD4,PSMD9,PSME1,PSME2,PSME4,PTEN,PTRH2,RAD23A,RCE1,RHOT1,RPS27A,RUVBL1,SEM1,SMAD1,SMAD2,SMAD4,SMURF2,STAM,STAM…
4-1BB Signaling in T Lymphocytes	4.24	ATF2,CHUK,IKBKG,MAP2K2,MAP2K4,MAPK1,MAPK11,MAPK12,MAPK3,MAPK8,NFKB2,NFKBIB,NFKBID,NFKBIE,REL,RELA,RELB,TRAF1,TRAF2
TNF signaling	4.09	BAG4,CHUK,CYLD,FADD,IKBKG,MAPKAPK2,MIB2,OTUD7B,RACK1,RBCK1,RNF31,RPS27A,SHARPIN,SPPL2A,SPPL2B,STUB1,TAB1,TAB2,TAB3,TAX1BP1,TBK1,TRADD,TRAF1,TRAF2,UBA52,ULK1,XIAP
Small Cell Lung Cancer Signaling	3.82	AKT3,APAF1,CDK4,CDK6,CHUK,CKS1B,CYC1,E2F1,E2F4,HDAC10,HDAC11,HDAC3,HDAC5,HDAC7,IKBKG,NFKB2,NFKBIB,NFKBID,NFKBIE,NOS1,PA2G4,PIK3C2A,PIK3C3,PIK3CA,PIK3CB,PIK3CG,PIK3R1,PIK3R4,PTEN,RB1,RBL2,REL,RELA,RELB,RXRB,SUV39H1,TRAF1,TRAF2,TRAF4,TRAF6
April Mediated Signaling	3.45	CHUK,IKBKG,MAP2K4,MAP2K7,MAPK1,MAPK11,MAPK12,MAPK8,NFAT5,NFATC2,NFATC3,NFKB2,NFKBIB,NFKBID,NFKBIE,REL,RELA,RELB,TRAF1,TRAF2,TRAF6
TAK1-dependent IKK and NF-kappa-B activation	3.31	AGER,APP,CHUK,IKBKG,LRRC14,N4BP1,NFKB2,NFKBIB,NKIRAS2,NOD1,RELA,RPS27A,TAB1,TAB2,TAB3,TIFA,TRAF2,TRAF6,UBA52,USP14
B Cell Activating Factor Signaling	3.27	CHUK,IKBKG,MAP2K4,MAP2K7,MAPK1,MAPK11,MAPK12,MAPK8,NFAT5,NFATC2,NFATC3,NFKB2,NFKBIB,NFKBID,NFKBIE,REL,RELA,RELB,TRAF1,TRAF2,TRAF6
Induction of Apoptosis by HIV1	3.17	APAF1,BAK1,BAX,BBC3,CHUK,CYC1,DAXX,DFFA,DIABLO,FADD,HTRA2,IKBKG,MAP2K4,MAP2K7,MAPK12,MAPK8,NFKB2,NFKBIB,NFKBID,NFKBIE,REL,RELA,RELB,SLC25A10,TRADD,TRAF1,TRAF2,XIAP
Endoplasmic Reticulum Stress Pathway	3.07	ATF4,ATF6,DDIT3,DNAJC3,EIF2AK3,EIF2S1,ERN1,MAPK8,MBTPS1,MBTPS2,TAOK3,TRAF2
14-3-3-mediated Signaling	3.03	AKT1S1,AKT3,BAD,BAX,CBL,ERAS,FOXO1,GSK3B,HRAS,MAP2K2,MAP2K4,MAPK1,MAPK12,MAPK3,MAPK8,NRAS,PDCD6IP,PIK3C2A,PIK3C3,PIK3CA,PIK3CB,PIK3CG,PIK3R1,PIK3R4,PLCB1,PLCB2,PLCB3,PLCB4,PLCL1,PRKCE,PRKCH,PRKCI,PRKCZ,PRKD3,RALB,RAP2A,SRPK2,STK11,STRADA,TRAF2,TUBA1B,TUBA8,TUBB3,TUBB4B,YAP1,YWHAB,YWHAQ
TNFR2 Signaling	2.75	CHUK,IKBKG,LTA,MAP2K4,MAPK8,NFKB2,NFKBIB,NFKBID,NFKBIE,REL,RELA,RELB,TBK1,TRAF1,TRAF2,XIAP
TWEAK Signaling	2.4	APAF1,BAG4,CHUK,FADD,IKBKG,NFKB2,NFKBIB,NFKBID,NFKBIE,REL,RELA,RELB,TNFRSF25,TRADD,TRAF1,TRAF2,XIAP
Death Receptor Signaling	2.32	ACIN1,APAF1,CHUK,CYC1,DAXX,DFFA,DIABLO,FADD,HTRA2,IKBKG,LIMK1,MAP2K4,MAP2K7,MAPK8,NFKB2,NFKBIB,NFKBID,NFKBIE,PARP10,PARP11,PARP2,PARP4,REL,RELA,RELB,ROCK1,TBK1,TIPARP,TNFRSF25,TNFSF15,TNKS,TNKS2,TRADD,TRAF2,XIAP
CD27 Signaling in Lymphocytes	2.28	APAF1,CHUK,CYC1,IKBKG,MAP2K2,MAP2K3,MAP2K4,MAP2K7,MAP3K10,MAP3K11,MAP3K13,MAP3K2,MAPK12,MAPK8,NFKB2,NFKBIB,NFKBID,NFKBIE,REL,RELA,RELB,SIVA1,TRAF2
Role of RIG1-like Receptors in Antiviral Innate Immunity	2.26	CHUK,EP300,FADD,IKBKG,IRF3,IRF7,NFKB2,NFKBIB,NFKBID,NFKBIE,REL,RELA,RELB,TBK1,TRAF2,TRAF6
Unfolded protein response	2.19	ATF4,ATF6,CANX,CEBPZ,DDIT3,DNAJB12,DNAJB13,DNAJB14,DNAJB2,DNAJB9,DNAJC10,DNAJC13,DNAJC16,DNAJC17,DNAJC3,DNAJC4,DNAJC6,DNAJC9,EDEM1,EIF2AK3,ERN1,HSPA4,MAP2K7,MAPK8,MBTPS1,MBTPS2,NFE2L2,PDIA2,PDIA6,SCAP,SEL1L,TRAF2,UBXN4
