# Supplementary material for: Implications of the KHDC4-TRAF2 axis in the context of prostate cancer prognosis
Source: Aging (Albany NY). 2025 Jun 23;17(6):1544–70. doi: 10.18632/aging.206273 (PMC12245195; doi:10.18632/aging.206273)
Supplement: Supplementary Table 10 [file aging-17-206273-s010.xlsx]

## Sheet: Supplementary Table 10
Supplementary Table 10. Distribution of KHDC, TRAF2, and KLK3 in TCGA-PRAD datasets with Gleason score.
samples	sample_type	KIAA0907	TRAF2	KLK3	Gleason_score
TCGA-HC-8259-11	Solid Tissue Normal	9.743	8.71	19.32	6
TCGA-HC-8258-11	Solid Tissue Normal	9.287	8.455	9.062	6
TCGA-CH-5768-11	Solid Tissue Normal	9.086	8.487	17.76	6
TCGA-EJ-7321-11	Solid Tissue Normal	9.042	8.52	18.55	6
TCGA-G9-6342-11	Solid Tissue Normal	8.342	8.817	19.39	6
TCGA-G9-6362-11	Solid Tissue Normal	10.88	9.253	18.38	7
TCGA-HC-8260-11	Solid Tissue Normal	10.02	8.466	19.23	7
TCGA-G9-6365-11	Solid Tissue Normal	9.994	9.245	17.76	7
TCGA-J4-A83J-11	Solid Tissue Normal	9.944	8.951	18.42	7
TCGA-HC-7740-11	Solid Tissue Normal	9.911	8.252	9.898	7
TCGA-HC-7211-11	Solid Tissue Normal	9.903	8.091	13.18	7
TCGA-HC-7738-11	Solid Tissue Normal	9.809	8.292	9.386	7
TCGA-G9-6333-11	Solid Tissue Normal	9.629	9.364	16.85	7
TCGA-EJ-7793-11	Solid Tissue Normal	9.455	8.599	18.46	7
TCGA-CH-5767-11	Solid Tissue Normal	9.406	8.324	17.52	7
TCGA-G9-6363-11	Solid Tissue Normal	9.327	9.021	17.68	7
TCGA-EJ-A8FO-11	Solid Tissue Normal	9.258	8.734	16.64	7
TCGA-EJ-7792-11	Solid Tissue Normal	9.256	8.62	17.74	7
TCGA-EJ-7785-11	Solid Tissue Normal	9.133	8.111	18.17	7
TCGA-EJ-7794-11	Solid Tissue Normal	9.111	8.438	16.97	7
TCGA-EJ-7789-11	Solid Tissue Normal	9.108	8.235	18.95	7
TCGA-EJ-7327-11	Solid Tissue Normal	9.084	8.234	19.15	7
TCGA-EJ-7328-11	Solid Tissue Normal	9.068	8.541	16.98	7
TCGA-EJ-7797-11	Solid Tissue Normal	9.045	8.481	18.92	7
TCGA-HC-7745-11	Solid Tissue Normal	9.002	8.458	8.392	7
TCGA-HC-7747-11	Solid Tissue Normal	8.943	8.224	8.172	7
TCGA-EJ-7784-11	Solid Tissue Normal	8.919	8.279	17.93	7
TCGA-EJ-7125-11	Solid Tissue Normal	8.88	8.123	19.14	7
TCGA-G9-6348-11	Solid Tissue Normal	8.877	8.883	18.36	7
TCGA-EJ-7781-11	Solid Tissue Normal	8.829	8.128	15.83	7
TCGA-HC-7752-11	Solid Tissue Normal	8.826	9.263	18	7
TCGA-EJ-7115-11	Solid Tissue Normal	8.8	8.48	18.67	7
TCGA-G9-6496-11	Solid Tissue Normal	8.79	8.928	18.44	7
TCGA-EJ-7315-11	Solid Tissue Normal	8.776	8.812	16.96	7
TCGA-EJ-7786-11	Solid Tissue Normal	8.776	7.956	17.43	7
TCGA-EJ-7331-11	Solid Tissue Normal	8.771	8.482	18.35	7
TCGA-HC-7737-11	Solid Tissue Normal	8.696	8.112	8.77	7
TCGA-G9-6351-11	Solid Tissue Normal	8.67	8.623	19.17	7
TCGA-G9-6384-11	Solid Tissue Normal	8.649	8.612	19.12	7
TCGA-EJ-7783-11	Solid Tissue Normal	8.582	8.605	14.87	7
TCGA-EJ-7317-11	Solid Tissue Normal	8.393	8.167	18.93	7
TCGA-EJ-7330-11	Solid Tissue Normal	8.363	8.309	17.22	7
TCGA-EJ-7314-11	Solid Tissue Normal	8.272	8.001	18.31	7
TCGA-EJ-7123-11	Solid Tissue Normal	8.26	7.816	16.81	7
TCGA-HC-7742-11	Solid Tissue Normal	8.235	8.821	18.6	7
TCGA-HC-8262-11	Solid Tissue Normal	10.17	8.778	17.22	8
TCGA-HC-7819-11	Solid Tissue Normal	8.951	8.579	18.69	8
TCGA-EJ-7782-11	Solid Tissue Normal	8.67	7.918	18.65	8
TCGA-G9-6356-11	Solid Tissue Normal	9.607	9.519	18.97	9
TCGA-CH-5761-11	Solid Tissue Normal	8.851	9.023	18.07	9
TCGA-G9-6499-11	Solid Tissue Normal	8.841	8.72	17.33	9
TCGA-CH-5769-11	Solid Tissue Normal	8.612	9.237	17.52	9
TCGA-V1-A9OT-01	Primary Tumor	11.16	9.267	17.94	6
TCGA-XJ-A9DQ-01	Primary Tumor	10.39	9.094	18.8	6
TCGA-FC-A8O0-01	Primary Tumor	10.26	8.695	18.74	6
TCGA-J4-A83K-01	Primary Tumor	10.22	8.888	18.65	6
TCGA-V1-A8WS-01	Primary Tumor	10.2	8.834	17.57	6
TCGA-2A-A8VO-01	Primary Tumor	10.16	8.825	19.26	6
TCGA-2A-A8VL-01	Primary Tumor	10.13	8.534	19.16	6
TCGA-M7-A720-01	Primary Tumor	10.08	8.928	18.32	6
TCGA-Y6-A8TL-01	Primary Tumor	10.08	8.856	18.95	6
TCGA-V1-A8WN-01	Primary Tumor	10.05	8.317	18.96	6
TCGA-V1-A9OF-01	Primary Tumor	9.975	8.495	19.07	6
TCGA-V1-A8MK-01	Primary Tumor	9.919	8.628	18.96	6
TCGA-2A-A8VV-01	Primary Tumor	9.839	8.809	19.2	6
TCGA-J4-AATV-01	Primary Tumor	9.826	9.273	17.8	6
TCGA-V1-A8MF-01	Primary Tumor	9.808	8.922	18.6	6
TCGA-2A-AAYO-01	Primary Tumor	9.785	8.909	19.03	6
TCGA-HC-8259-01	Primary Tumor	9.784	8.659	19.77	6
TCGA-J9-A8CN-01	Primary Tumor	9.774	8.726	20.03	6
TCGA-QU-A6IP-01	Primary Tumor	9.676	8.997	19.08	6
TCGA-EJ-A65M-01	Primary Tumor	9.504	8.996	19.32	6
TCGA-HC-8213-01	Primary Tumor	9.472	8.387	19.24	6
TCGA-H9-A6BX-01	Primary Tumor	9.463	9.059	17.71	6
TCGA-2A-AAYU-01	Primary Tumor	9.458	8.571	19.05	6
TCGA-J4-AAU2-01	Primary Tumor	9.446	8.87	19.43	6
TCGA-G9-7509-01	Primary Tumor	9.359	8.471	19.23	6
TCGA-V1-A9OQ-01	Primary Tumor	9.324	8.891	19.72	6
TCGA-G9-6342-01	Primary Tumor	9.317	9.141	18.69	6
TCGA-HC-8258-01	Primary Tumor	9.311	8.762	18.8	6
TCGA-ZG-A8QX-01	Primary Tumor	9.305	8.849	18.63	6
TCGA-QU-A6IO-01	Primary Tumor	9.283	9.998	20.15	6
TCGA-EJ-AB20-01	Primary Tumor	9.266	9.15	16.97	6
TCGA-CH-5768-01	Primary Tumor	9.18	8.47	18.09	6
TCGA-EJ-7321-01	Primary Tumor	9.058	8.651	17.67	6
TCGA-CH-5738-01	Primary Tumor	9.03	8.318	17.99	6
TCGA-J4-A67Q-01	Primary Tumor	9.016	9.819	18.28	6
TCGA-HC-7075-01	Primary Tumor	8.989	8.642	19.65	6
TCGA-EJ-AB27-01	Primary Tumor	8.985	8.8	19.39	6
TCGA-G9-6371-01	Primary Tumor	8.91	8.501	19.76	6
TCGA-VP-A87E-01	Primary Tumor	8.811	8.62	18.36	6
TCGA-HC-7748-01	Primary Tumor	8.723	8.218	18.57	6
TCGA-HC-7077-01	Primary Tumor	8.622	8.797	18.91	6
TCGA-EJ-5517-01	Primary Tumor	8.533	7.998	19.86	6
TCGA-HC-7209-01	Primary Tumor	8.465	8.813	18.48	6
TCGA-HI-7170-01	Primary Tumor	8.405	8.851	17.37	6
TCGA-G9-6347-01	Primary Tumor	8.195	9.998	18.51	6
TCGA-VP-A875-01	Primary Tumor	11.12	9.24	18.98	7
TCGA-V1-A8MG-01	Primary Tumor	10.77	9.083	18.45	7
TCGA-TP-A8TT-01	Primary Tumor	10.69	9.122	18.5	7
TCGA-KK-A7AZ-01	Primary Tumor	10.64	9.441	18.71	7
TCGA-J4-A83I-01	Primary Tumor	10.6	9.107	18.82	7
TCGA-KC-A7FA-01	Primary Tumor	10.57	9.13	18.57	7
TCGA-KC-A7FD-01	Primary Tumor	10.54	8.493	19.16	7
TCGA-KK-A8I4-01	Primary Tumor	10.53	9.12	17.27	7
TCGA-KC-A7F6-01	Primary Tumor	10.5	9.174	17.98	7
TCGA-G9-6362-01	Primary Tumor	10.5	9.168	19.48	7
TCGA-X4-A8KS-01	Primary Tumor	10.49	9.238	18.73	7
TCGA-EJ-A7NH-01	Primary Tumor	10.49	8.962	18.84	7
TCGA-EJ-8470-01	Primary Tumor	10.49	8.75	18.98	7
TCGA-HC-8260-01	Primary Tumor	10.49	8.647	19.02	7
TCGA-2A-A8W1-01	Primary Tumor	10.47	8.505	19.49	7
TCGA-VN-A88O-01	Primary Tumor	10.44	8.91	19.29	7
TCGA-HC-A8D0-01	Primary Tumor	10.43	9.069	17.41	7
TCGA-HC-A76W-01	Primary Tumor	10.42	9.357	17.84	7
TCGA-XK-AAJA-01	Primary Tumor	10.41	9.428	19.6	7
TCGA-KC-A7F5-01	Primary Tumor	10.4	9.411	18.67	7
TCGA-KK-A7AV-01	Primary Tumor	10.4	9.373	18.74	7
TCGA-TP-A8TV-01	Primary Tumor	10.4	8.928	18.33	7
TCGA-V1-A8WL-01	Primary Tumor	10.39	8.559	19.75	7
TCGA-J4-8198-01	Primary Tumor	10.38	8.804	18.3	7
TCGA-VN-A88M-01	Primary Tumor	10.37	9.035	19.16	7
TCGA-EJ-A65E-01	Primary Tumor	10.37	8.652	19.04	7
TCGA-V1-A8MU-01	Primary Tumor	10.36	9.031	19.24	7
TCGA-KK-A8IH-01	Primary Tumor	10.34	9.425	18.27	7
TCGA-V1-A8MM-01	Primary Tumor	10.33	8.939	18.48	7
TCGA-KK-A6DY-01	Primary Tumor	10.3	9.187	18.19	7
TCGA-YL-A8SH-01	Primary Tumor	10.29	9.181	17.92	7
TCGA-M7-A725-01	Primary Tumor	10.29	8.72	18.37	7
TCGA-VN-A88L-01	Primary Tumor	10.28	9.289	18.98	7
TCGA-KK-A7B1-01	Primary Tumor	10.27	9.374	18.75	7
TCGA-XK-AAJP-01	Primary Tumor	10.27	9.049	19.06	7
TCGA-XJ-A83F-01	Primary Tumor	10.25	9.638	19.14	7
TCGA-XK-AAJU-01	Primary Tumor	10.19	9.449	18.28	7
TCGA-J4-A83J-01	Primary Tumor	10.16	8.893	18.77	7
TCGA-V1-A9OY-01	Primary Tumor	10.15	9.135	18.37	7
TCGA-M7-A71Z-01	Primary Tumor	10.13	9.624	18.6	7
TCGA-VN-A88P-01	Primary Tumor	10.13	9.003	18.76	7
TCGA-KK-A8IM-01	Primary Tumor	10.13	8.97	18.4	7
TCGA-KK-A7AQ-01	Primary Tumor	10.12	9.561	19.39	7
TCGA-M7-A71Y-01	Primary Tumor	10.12	9.186	18.1	7
TCGA-HC-A76X-01	Primary Tumor	10.12	8.754	18.96	7
TCGA-EJ-A7NK-01	Primary Tumor	10.11	8.811	18.85	7
TCGA-G9-6363-01	Primary Tumor	10.11	8.401	18.35	7
TCGA-J4-A67T-01	Primary Tumor	10.07	8.741	19.26	7
TCGA-HC-A6HY-01	Primary Tumor	10.06	9.666	18.9	7
TCGA-VN-A88N-01	Primary Tumor	10.06	9.025	19.97	7
TCGA-EJ-A7NF-01	Primary Tumor	10.06	8.764	19.3	7
TCGA-J4-A83M-01	Primary Tumor	10.05	9.011	19.31	7
TCGA-J4-A6M7-01	Primary Tumor	10.04	8.808	18.74	7
TCGA-EJ-7328-01	Primary Tumor	10.02	9.29	17.19	7
TCGA-KC-A4BL-01	Primary Tumor	10.02	9.171	17.07	7
TCGA-EJ-7789-01	Primary Tumor	9.995	9.417	18.82	7
TCGA-EJ-A7NG-01	Primary Tumor	9.991	8.856	18.25	7
TCGA-EJ-A7NN-01	Primary Tumor	9.989	8.964	18.24	7
TCGA-HC-7078-01	Primary Tumor	9.975	9.085	19.45	7
TCGA-J4-8200-01	Primary Tumor	9.974	8.064	18.96	7
TCGA-KC-A7F3-01	Primary Tumor	9.967	8.557	18.65	7
TCGA-KK-A8I6-01	Primary Tumor	9.96	8.925	18.65	7
TCGA-XK-AAJR-01	Primary Tumor	9.955	8.992	19.73	7
TCGA-FC-7708-01	Primary Tumor	9.945	8.442	18.33	7
TCGA-J4-A83L-01	Primary Tumor	9.936	8.199	18.24	7
TCGA-XK-AAJT-01	Primary Tumor	9.903	9.26	18.23	7
TCGA-KC-A4BN-01	Primary Tumor	9.887	8.306	19.33	7
TCGA-CH-5765-01	Primary Tumor	9.88	8.389	18.64	7
TCGA-EJ-7788-01	Primary Tumor	9.872	8.394	18.31	7
TCGA-KK-A8I5-01	Primary Tumor	9.871	8.755	18.56	7
TCGA-CH-5750-01	Primary Tumor	9.856	8.474	18.08	7
TCGA-KC-A7FE-01	Primary Tumor	9.847	8.882	18.3	7
TCGA-XA-A8JR-01	Primary Tumor	9.822	8.834	19.25	7
TCGA-HC-8257-01	Primary Tumor	9.819	8.908	18.02	7
TCGA-CH-5746-01	Primary Tumor	9.817	8.447	18.38	7
TCGA-HC-7752-01	Primary Tumor	9.811	9.795	18.76	7
TCGA-KK-A8IF-01	Primary Tumor	9.796	9.253	16.81	7
TCGA-XJ-A83G-01	Primary Tumor	9.788	9.162	20.01	7
TCGA-YL-A8HO-01	Primary Tumor	9.774	9.157	18.64	7
TCGA-EJ-A46I-01	Primary Tumor	9.76	8.889	18.51	7
TCGA-QU-A6IN-01	Primary Tumor	9.754	10.03	18.1	7
TCGA-V1-A8ML-01	Primary Tumor	9.751	8.901	19.35	7
TCGA-HC-7745-01	Primary Tumor	9.747	8.945	18.07	7
TCGA-J4-A83N-01	Primary Tumor	9.747	8.735	19.53	7
TCGA-CH-5766-01	Primary Tumor	9.744	8.32	18.13	7
TCGA-HC-8256-01	Primary Tumor	9.73	8.627	19.3	7
TCGA-CH-5790-01	Primary Tumor	9.725	8.74	17.65	7
TCGA-HC-8261-01	Primary Tumor	9.715	8.869	18.85	7
TCGA-KK-A59Z-01	Primary Tumor	9.714	9.381	18.11	7
TCGA-EJ-A46H-01	Primary Tumor	9.711	8.408	17.42	7
TCGA-EJ-A8FS-01	Primary Tumor	9.703	8.383	18.9	7
TCGA-EJ-A8FO-01	Primary Tumor	9.69	8.871	19.07	7
TCGA-HC-A8D1-01	Primary Tumor	9.686	8.481	18.77	7
TCGA-CH-5748-01	Primary Tumor	9.671	8.326	18.98	7
TCGA-HC-7230-01	Primary Tumor	9.67	9.116	18.11	7
TCGA-EJ-7312-01	Primary Tumor	9.67	8.861	20.08	7
TCGA-M7-A721-01	Primary Tumor	9.642	8.697	19.06	7
TCGA-EJ-7784-01	Primary Tumor	9.634	8.752	17.87	7
TCGA-M7-A723-01	Primary Tumor	9.633	9.023	18.8	7
TCGA-V1-A8X3-01	Primary Tumor	9.627	8.557	19.54	7
TCGA-KK-A7AY-01	Primary Tumor	9.611	9.332	18.65	7
TCGA-G9-6498-01	Primary Tumor	9.608	9.658	16.94	7
TCGA-TK-A8OK-01	Primary Tumor	9.608	8.446	17.35	7
TCGA-KK-A8IG-01	Primary Tumor	9.601	8.688	19.04	7
TCGA-EJ-5522-01	Primary Tumor	9.601	8.133	18.17	7
TCGA-XJ-A83H-01	Primary Tumor	9.6	8.788	19.29	7
TCGA-V1-A8MJ-01	Primary Tumor	9.596	9.007	18.51	7
TCGA-EJ-7783-01	Primary Tumor	9.596	8.5	17.44	7
TCGA-HC-8216-01	Primary Tumor	9.583	8.418	19.15	7
TCGA-FC-A6HD-01	Primary Tumor	9.582	9.977	19.57	7
TCGA-VP-A87C-01	Primary Tumor	9.582	8.989	17.13	7
TCGA-HC-7079-01	Primary Tumor	9.57	9.444	15.27	7
TCGA-HC-7738-01	Primary Tumor	9.563	8.56	19	7
TCGA-KK-A6E2-01	Primary Tumor	9.56	8.967	18.1	7
TCGA-CH-5788-01	Primary Tumor	9.546	8.413	17.04	7
TCGA-CH-5744-01	Primary Tumor	9.528	8.666	19.63	7
TCGA-EJ-5511-01	Primary Tumor	9.517	8.743	19.15	7
TCGA-G9-6378-01	Primary Tumor	9.514	8.763	18.67	7
TCGA-G9-6354-01	Primary Tumor	9.512	9.03	19.82	7
TCGA-CH-5762-01	Primary Tumor	9.496	8.598	17.89	7
TCGA-EJ-A8FN-01	Primary Tumor	9.49	8.776	18.59	7
TCGA-J9-A8CP-01	Primary Tumor	9.483	8.835	19.88	7
TCGA-J4-A67N-01	Primary Tumor	9.482	9.521	18.92	7
TCGA-G9-6338-01	Primary Tumor	9.474	8.84	18.46	7
TCGA-EJ-5530-01	Primary Tumor	9.471	8.543	18.91	7
TCGA-CH-5740-01	Primary Tumor	9.457	8.629	17.84	7
TCGA-CH-5743-01	Primary Tumor	9.455	8.792	16.85	7
TCGA-J4-A67S-01	Primary Tumor	9.446	9.652	19.93	7
TCGA-HC-7211-01	Primary Tumor	9.438	8.21	19.17	7
TCGA-HC-7817-01	Primary Tumor	9.434	8.968	17.07	7
TCGA-EJ-7218-01	Primary Tumor	9.428	9.007	19.38	7
TCGA-HC-7080-01	Primary Tumor	9.427	9.031	18	7
TCGA-FC-A66V-01	Primary Tumor	9.418	9.683	19.53	7
TCGA-HC-A6HX-01	Primary Tumor	9.41	10.01	18.77	7
TCGA-HC-A6AQ-01	Primary Tumor	9.406	9.603	19.74	7
TCGA-G9-6339-01	Primary Tumor	9.401	9.293	18.86	7
TCGA-EJ-7797-01	Primary Tumor	9.384	8.678	18.54	7
TCGA-EJ-7325-01	Primary Tumor	9.374	9.934	19.92	7
TCGA-CH-5791-01	Primary Tumor	9.363	9.193	18.15	7
TCGA-HC-7820-01	Primary Tumor	9.362	8.4	19.04	7
TCGA-HC-A6AL-01	Primary Tumor	9.36	9.636	19.45	7
TCGA-EJ-7318-01	Primary Tumor	9.36	9.388	19.83	7
TCGA-2A-AAYF-01	Primary Tumor	9.359	8.536	19.76	7
TCGA-QU-A6IL-01	Primary Tumor	9.356	9.86	20.17	7
TCGA-HC-7212-01	Primary Tumor	9.338	8.423	18.48	7
TCGA-G9-6361-01	Primary Tumor	9.333	8.988	18.67	7
TCGA-HC-7736-01	Primary Tumor	9.323	8.582	16.8	7
TCGA-HC-A6AO-01	Primary Tumor	9.307	9.778	19.62	7
TCGA-H9-A6BY-01	Primary Tumor	9.307	9.766	19.24	7
TCGA-G9-6333-01	Primary Tumor	9.307	8.813	19.66	7
TCGA-KK-A8IJ-01	Primary Tumor	9.273	8.631	19.59	7
TCGA-G9-6379-01	Primary Tumor	9.267	10.01	19.13	7
TCGA-H9-7775-01	Primary Tumor	9.266	8.556	18.87	7
TCGA-XK-AAK1-01	Primary Tumor	9.264	8.814	20.2	7
TCGA-J4-A67K-01	Primary Tumor	9.254	9.515	18.41	7
TCGA-KK-A6E5-01	Primary Tumor	9.246	8.908	19.29	7
TCGA-EJ-5502-01	Primary Tumor	9.242	8.596	18.47	7
TCGA-QU-A6IM-01	Primary Tumor	9.224	10.16	19.35	7
TCGA-EJ-5508-01	Primary Tumor	9.22	8.064	18.26	7
TCGA-EJ-7327-01	Primary Tumor	9.208	8.557	17.78	7
TCGA-CH-5745-01	Primary Tumor	9.207	8.475	18.35	7
TCGA-EJ-7331-01	Primary Tumor	9.204	8.181	19.04	7
TCGA-J4-A67L-01	Primary Tumor	9.2	9.376	19.52	7
TCGA-EJ-A6RC-01	Primary Tumor	9.195	8.936	18.66	7
TCGA-HC-7749-01	Primary Tumor	9.194	8.607	19.14	7
TCGA-EJ-7792-01	Primary Tumor	9.168	8.378	18.15	7
TCGA-CH-5767-01	Primary Tumor	9.166	7.952	19.44	7
TCGA-HC-7818-01	Primary Tumor	9.148	8.536	18.65	7
TCGA-CH-5763-01	Primary Tumor	9.131	7.899	18.45	7
TCGA-CH-5764-01	Primary Tumor	9.102	8.343	17.97	7
TCGA-G9-6329-01	Primary Tumor	9.1	9.393	18.25	7
TCGA-G9-6332-01	Primary Tumor	9.086	8.995	19.64	7
TCGA-J4-A67M-01	Primary Tumor	9.069	9.791	19.58	7
TCGA-HC-A6AS-01	Primary Tumor	9.059	9.332	18.89	7
TCGA-HC-7231-01	Primary Tumor	9.052	8.723	17.97	7
TCGA-VP-A87J-01	Primary Tumor	9.051	8.368	19.13	7
TCGA-J4-A67R-01	Primary Tumor	9.036	9.711	19.03	7
TCGA-EJ-5497-01	Primary Tumor	9.03	8.054	18.8	7
TCGA-CH-5739-01	Primary Tumor	9.002	8.433	17.94	7
TCGA-EJ-5542-01	Primary Tumor	8.978	7.815	18.1	7
TCGA-EJ-5527-01	Primary Tumor	8.975	7.994	17.95	7
TCGA-EJ-7785-01	Primary Tumor	8.97	8.274	17.99	7
TCGA-J4-A67O-01	Primary Tumor	8.943	9.781	20.17	7
TCGA-EJ-7791-01	Primary Tumor	8.94	8.712	18.73	7
TCGA-G9-6366-01	Primary Tumor	8.933	8.322	18.73	7
TCGA-G9-6496-01	Primary Tumor	8.912	9.329	19.21	7
TCGA-CH-5789-01	Primary Tumor	8.903	8.024	18.75	7
TCGA-HC-7742-01	Primary Tumor	8.898	9.054	19.27	7
TCGA-EJ-5494-01	Primary Tumor	8.896	8.711	15.91	7
TCGA-G9-6373-01	Primary Tumor	8.895	10.03	17.93	7
TCGA-EJ-7330-01	Primary Tumor	8.883	8.028	18.15	7
TCGA-HC-A6AP-01	Primary Tumor	8.847	9.57	19.09	7
TCGA-EJ-7786-01	Primary Tumor	8.839	8.134	19.04	7
TCGA-HC-A6AN-01	Primary Tumor	8.812	9.644	19.73	7
TCGA-EJ-7781-01	Primary Tumor	8.809	8.132	18.69	7
TCGA-KK-A7AW-01	Primary Tumor	8.802	9.757	20.5	7
TCGA-HC-7737-01	Primary Tumor	8.801	8.519	18.45	7
TCGA-HC-7750-01	Primary Tumor	8.794	8.62	18.92	7
TCGA-HC-7210-01	Primary Tumor	8.782	7.815	19.18	7
TCGA-G9-6384-01	Primary Tumor	8.779	8.55	18.42	7
TCGA-EJ-5532-01	Primary Tumor	8.775	8.275	19.41	7
TCGA-CH-5794-01	Primary Tumor	8.76	8.842	18.77	7
TCGA-EJ-7794-01	Primary Tumor	8.707	8.112	18.59	7
TCGA-EJ-5516-01	Primary Tumor	8.706	7.794	18.36	7
TCGA-EJ-5515-01	Primary Tumor	8.703	7.665	19.09	7
TCGA-G9-7522-01	Primary Tumor	8.697	8.583	19.47	7
TCGA-EJ-5504-01	Primary Tumor	8.69	8.128	18.68	7
TCGA-G9-6385-01	Primary Tumor	8.675	8.883	19.06	7
TCGA-G9-6365-01	Primary Tumor	8.669	8.712	17.59	7
TCGA-EJ-5512-01	Primary Tumor	8.668	8.131	18.49	7
TCGA-EJ-5501-01	Primary Tumor	8.663	8.696	18.36	7
TCGA-G9-6351-01	Primary Tumor	8.647	8.617	19.68	7
TCGA-EJ-5505-01	Primary Tumor	8.642	7.982	19.05	7
TCGA-G9-6377-01	Primary Tumor	8.634	8.764	19.29	7
TCGA-EJ-5496-01	Primary Tumor	8.63	8.35	18.63	7
TCGA-G9-6370-01	Primary Tumor	8.623	8.736	18.16	7
TCGA-CH-5771-01	Primary Tumor	8.589	8.96	18.73	7
TCGA-KK-A6E4-01	Primary Tumor	8.576	9.622	19.47	7
TCGA-HI-7169-01	Primary Tumor	8.575	9.326	17.69	7
TCGA-EJ-7115-01	Primary Tumor	8.575	8.856	18.34	7
TCGA-G9-7519-01	Primary Tumor	8.563	8.651	19.91	7
TCGA-G9-6348-01	Primary Tumor	8.562	8.558	18.95	7
TCGA-KK-A6E3-01	Primary Tumor	8.557	9.49	20.59	7
TCGA-HC-7233-01	Primary Tumor	8.53	8.536	17.7	7
TCGA-G9-6364-01	Primary Tumor	8.5	7.86	18.77	7
TCGA-CH-5737-01	Primary Tumor	8.497	8.374	19.99	7
TCGA-EJ-7123-01	Primary Tumor	8.487	8.376	19.06	7
TCGA-G9-6494-01	Primary Tumor	8.484	8.5	19.51	7
TCGA-EJ-7793-01	Primary Tumor	8.456	8.53	19.23	7
TCGA-HC-7744-01	Primary Tumor	8.393	8.858	17.33	7
TCGA-EJ-7125-01	Primary Tumor	8.372	8.254	18.77	7
TCGA-EJ-5531-01	Primary Tumor	8.367	8.755	18.31	7
TCGA-G9-6336-01	Primary Tumor	8.304	9.069	19.25	7
TCGA-HC-7747-01	Primary Tumor	8.275	8.76	18.34	7
TCGA-EJ-7317-01	Primary Tumor	8.274	8.539	19.43	7
TCGA-EJ-5498-01	Primary Tumor	8.247	8.045	17.65	7
TCGA-EJ-7315-01	Primary Tumor	8.245	9.025	18.51	7
TCGA-HC-7740-01	Primary Tumor	8.243	8.377	18.72	7
TCGA-EJ-7314-01	Primary Tumor	8.238	8.419	18.13	7
TCGA-G9-7525-01	Primary Tumor	8.221	9.3	18.8	7
TCGA-G9-6343-01	Primary Tumor	8.218	8.793	20.31	7
TCGA-G9-6369-01	Primary Tumor	8.192	8.971	19.51	7
TCGA-G9-6353-01	Primary Tumor	8.183	8.488	19.24	7
TCGA-EJ-5499-01	Primary Tumor	8.155	8.738	17.88	7
TCGA-EJ-5510-01	Primary Tumor	8.11	8.616	19.07	7
TCGA-EJ-5521-01	Primary Tumor	7.926	9.38	18.78	7
TCGA-EJ-5509-01	Primary Tumor	7.896	8.525	17.92	7
TCGA-WW-A8ZI-01	Primary Tumor	11.36	9.235	16.67	8
TCGA-V1-A9ZR-01	Primary Tumor	10.99	9.348	16.71	8
TCGA-VN-A88Q-01	Primary Tumor	10.9	9.852	18.19	8
TCGA-VN-A88K-01	Primary Tumor	10.83	9.206	18.61	8
TCGA-FC-A4JI-01	Primary Tumor	10.83	8.968	16.05	8
TCGA-HC-8265-01	Primary Tumor	10.82	9.017	18.17	8
TCGA-YL-A8SL-01	Primary Tumor	10.76	9.448	17.42	8
TCGA-EJ-A46G-01	Primary Tumor	10.62	9.629	17.65	8
TCGA-EJ-8472-01	Primary Tumor	10.62	8.893	18.19	8
TCGA-Y6-A9XI-01	Primary Tumor	10.59	9.421	19.54	8
TCGA-HC-A48F-01	Primary Tumor	10.59	9.271	17.47	8
TCGA-YL-A8SA-01	Primary Tumor	10.58	9.571	19.38	8
TCGA-XJ-A9DK-01	Primary Tumor	10.55	9.041	17.75	8
TCGA-KK-A8I9-01	Primary Tumor	10.53	9.287	17.68	8
TCGA-V1-A9O9-01	Primary Tumor	10.49	9.209	16.94	8
TCGA-G9-A9S4-01	Primary Tumor	10.46	9.372	17.4	8
TCGA-VP-A87K-01	Primary Tumor	10.45	9.363	18.48	8
TCGA-SU-A7E7-01	Primary Tumor	10.36	8.774	18.67	8
TCGA-J4-A6G1-01	Primary Tumor	10.35	9.394	17.59	8
TCGA-M7-A724-01	Primary Tumor	10.31	9.529	19.73	8
TCGA-2A-A8VX-01	Primary Tumor	10.3	9.21	18.46	8
TCGA-XK-AAJ3-01	Primary Tumor	10.26	8.894	18.72	8
TCGA-G9-A9S7-01	Primary Tumor	10.17	9.472	18.41	8
TCGA-YL-A8SF-01	Primary Tumor	10.14	8.867	17.38	8
TCGA-J4-A6G3-01	Primary Tumor	10.12	8.87	17.55	8
TCGA-HC-8266-01	Primary Tumor	10.09	9.679	18.03	8
TCGA-V1-A9OX-01	Primary Tumor	10.04	9.106	19.21	8
TCGA-VN-A88I-01	Primary Tumor	10.02	9.312	17.18	8
TCGA-EJ-A46D-01	Primary Tumor	10.01	9.095	18.52	8
TCGA-EJ-A65G-01	Primary Tumor	10.01	8.494	19.46	8
TCGA-VP-A876-01	Primary Tumor	9.993	9.154	18.61	8
TCGA-EJ-A46E-01	Primary Tumor	9.937	8.885	16.53	8
TCGA-VN-A88R-01	Primary Tumor	9.934	8.832	18.93	8
TCGA-VP-A87B-01	Primary Tumor	9.931	8.757	19.49	8
TCGA-EJ-A46F-01	Primary Tumor	9.929	9.492	19.77	8
TCGA-EJ-8474-01	Primary Tumor	9.917	8.639	19.08	8
TCGA-CH-5752-01	Primary Tumor	9.887	8.223	16.47	8
TCGA-VP-A872-01	Primary Tumor	9.876	9.61	14.91	8
TCGA-EJ-A46B-01	Primary Tumor	9.852	8.584	19.03	8
TCGA-EJ-A7NJ-01	Primary Tumor	9.842	8.516	19.39	8
TCGA-EJ-5526-01	Primary Tumor	9.826	8.413	18.67	8
TCGA-XK-AAIR-01	Primary Tumor	9.807	8.649	18.98	8
TCGA-HC-7821-01	Primary Tumor	9.782	9.583	18.38	8
TCGA-YL-A9WJ-01	Primary Tumor	9.78	8.749	18.89	8
TCGA-EJ-8468-01	Primary Tumor	9.76	8.229	18.74	8
TCGA-4L-AA1F-01	Primary Tumor	9.751	8.453	14.33	8
TCGA-EJ-A8FU-01	Primary Tumor	9.75	8.582	18.36	8
TCGA-G9-A9S0-01	Primary Tumor	9.749	9.172	15.86	8
TCGA-EJ-A65D-01	Primary Tumor	9.692	9.986	19.17	8
TCGA-HC-7819-01	Primary Tumor	9.676	8.446	19.05	8
TCGA-EJ-A8FP-01	Primary Tumor	9.666	8.619	19.01	8
TCGA-EJ-5519-01	Primary Tumor	9.663	8.837	19	8
TCGA-G9-7521-01	Primary Tumor	9.658	8.765	18.76	8
TCGA-V1-A9ZK-01	Primary Tumor	9.557	8.646	18.16	8
TCGA-EJ-A6RA-01	Primary Tumor	9.535	9.321	19.06	8
TCGA-HC-8262-01	Primary Tumor	9.531	8.706	18.69	8
TCGA-EJ-5506-01	Primary Tumor	9.47	8.353	17.58	8
TCGA-EJ-7782-01	Primary Tumor	9.211	8.748	17.81	8
TCGA-M7-A722-01	Primary Tumor	9.12	9.552	19.06	8
TCGA-V1-A9OH-01	Primary Tumor	9.114	8.918	18.87	8
TCGA-EJ-5495-01	Primary Tumor	8.972	8.61	17	8
TCGA-VN-A943-01	Primary Tumor	8.895	8.45	19.76	8
TCGA-EJ-5503-01	Primary Tumor	8.673	8.804	18.76	8
TCGA-G9-7510-01	Primary Tumor	8.567	8.821	18.96	8
TCGA-KK-A8ID-01	Primary Tumor	11.52	8.786	19.12	9
TCGA-ZG-A9KY-01	Primary Tumor	11	8.997	18.31	9
TCGA-HC-A9TE-01	Primary Tumor	10.99	9.933	14.07	9
TCGA-XJ-A9DX-01	Primary Tumor	10.97	9.439	18.87	9
TCGA-KK-A8IK-01	Primary Tumor	10.94	8.906	18.21	9
TCGA-KK-A7B3-01	Primary Tumor	10.92	9.121	18.95	9
TCGA-YL-A8SP-01	Primary Tumor	10.82	8.797	17.48	9
TCGA-YL-A8SJ-01	Primary Tumor	10.78	9.293	16.79	9
TCGA-KK-A7AP-01	Primary Tumor	10.77	9.348	18.63	9
TCGA-YL-A8SR-01	Primary Tumor	10.74	8.833	19.47	9
TCGA-KK-A7AU-01	Primary Tumor	10.72	9.58	19.25	9
TCGA-V1-A8WV-01	Primary Tumor	10.67	10.41	16.85	9
TCGA-KK-A8II-01	Primary Tumor	10.64	8.776	18.43	9
TCGA-KK-A7B4-01	Primary Tumor	10.62	9.773	17.85	9
TCGA-HC-A4ZV-01	Primary Tumor	10.58	9.898	17.16	9
TCGA-ZG-A9L5-01	Primary Tumor	10.54	9.75	18.66	9
TCGA-YL-A8SO-01	Primary Tumor	10.54	9.493	18.24	9
TCGA-KK-A8IL-01	Primary Tumor	10.54	9.331	16.93	9
TCGA-YL-A8HL-01	Primary Tumor	10.53	9.36	18.84	9
TCGA-V1-A9O5-01	Primary Tumor	10.52	9.382	17.55	9
TCGA-KK-A8I8-01	Primary Tumor	10.51	9.183	18.24	9
TCGA-KK-A59V-01	Primary Tumor	10.5	9.476	17.06	9
TCGA-XJ-A9DI-01	Primary Tumor	10.48	9.408	17.53	9
TCGA-2A-A8VT-01	Primary Tumor	10.47	8.671	16.86	9
TCGA-CH-5753-01	Primary Tumor	10.45	8.959	18.95	9
TCGA-EJ-A7NM-01	Primary Tumor	10.44	9.316	17.67	9
TCGA-KK-A8IA-01	Primary Tumor	10.44	9.204	18.33	9
TCGA-YL-A9WK-01	Primary Tumor	10.43	9.044	18.83	9
TCGA-YL-A8HK-01	Primary Tumor	10.42	8.984	17.81	9
TCGA-YL-A9WY-01	Primary Tumor	10.41	8.952	17.61	9
TCGA-V1-A9OL-01	Primary Tumor	10.4	9.917	18.35	9
TCGA-VP-A87D-01	Primary Tumor	10.4	9.229	19.01	9
TCGA-HC-A9TH-01	Primary Tumor	10.4	9.092	17.8	9
TCGA-HC-A632-01	Primary Tumor	10.38	10.11	17.84	9
TCGA-YL-A8S8-01	Primary Tumor	10.37	8.528	17.83	9
TCGA-YL-A9WL-01	Primary Tumor	10.36	8.957	18.21	9
TCGA-V1-A9ZI-01	Primary Tumor	10.34	9.627	17.24	9
TCGA-YL-A8SC-01	Primary Tumor	10.34	9.463	18.6	9
TCGA-HI-7171-01	Primary Tumor	10.32	9.751	18.17	9
TCGA-YL-A9WX-01	Primary Tumor	10.32	9.045	18.13	9
TCGA-YL-A8SQ-01	Primary Tumor	10.3	9.24	18.99	9
TCGA-KK-A6E1-01	Primary Tumor	10.3	8.379	18.77	9
TCGA-MG-AAMC-01	Primary Tumor	10.29	9.157	19.49	9
TCGA-FC-7961-01	Primary Tumor	10.28	8.457	17.45	9
TCGA-YL-A8SK-01	Primary Tumor	10.25	8.891	17.27	9
TCGA-J9-A8CM-01	Primary Tumor	10.24	8.748	17.67	9
TCGA-KK-A5A1-01	Primary Tumor	10.23	8.851	18.24	9
TCGA-XQ-A8TB-01	Primary Tumor	10.23	8.553	17.48	9
TCGA-HC-A8CY-01	Primary Tumor	10.22	9.431	19.41	9
TCGA-J9-A8CK-01	Primary Tumor	10.22	9.1	18.18	9
TCGA-ZG-A9M4-01	Primary Tumor	10.21	10	14.42	9
TCGA-X4-A8KQ-01	Primary Tumor	10.21	9.371	18.85	9
TCGA-J4-AATZ-01	Primary Tumor	10.17	9.292	18.36	9
TCGA-VP-A878-01	Primary Tumor	10.17	9.212	18.21	9
TCGA-EJ-A65F-01	Primary Tumor	10.16	8.769	18.79	9
TCGA-ZG-A9L0-01	Primary Tumor	10.14	9.131	17.77	9
TCGA-J9-A8CL-01	Primary Tumor	10.1	9.317	18.95	9
TCGA-YL-A9WH-01	Primary Tumor	10.08	9.65	16.19	9
TCGA-V1-A9OA-01	Primary Tumor	10.08	8.829	17.05	9
TCGA-HC-A631-01	Primary Tumor	10.08	8.813	16.96	9
TCGA-KC-A4BV-01	Primary Tumor	10.05	8.581	18.32	9
TCGA-CH-5754-01	Primary Tumor	10.04	9.177	17.95	9
TCGA-VP-A879-01	Primary Tumor	10.04	8.846	18.86	9
TCGA-ZG-A9LU-01	Primary Tumor	10.03	9.417	17.36	9
TCGA-YL-A8SB-01	Primary Tumor	10.02	8.855	18.36	9
TCGA-YL-A8S9-01	Primary Tumor	10.01	8.941	19.18	9
TCGA-KK-A59X-01	Primary Tumor	10	9.14	18.42	9
TCGA-ZG-A9LN-01	Primary Tumor	9.969	9.109	18.06	9
TCGA-KC-A4BR-01	Primary Tumor	9.96	8.582	18.61	9
TCGA-ZG-A9LY-01	Primary Tumor	9.936	9.017	18.64	9
TCGA-CH-5761-01	Primary Tumor	9.899	8.935	16.22	9
TCGA-YJ-A8SW-01	Primary Tumor	9.895	8.208	18.72	9
TCGA-KK-A6E0-01	Primary Tumor	9.893	8.462	18.7	9
TCGA-HC-8264-01	Primary Tumor	9.881	8.265	18.29	9
TCGA-ZG-A9LZ-01	Primary Tumor	9.874	9.295	17.43	9
TCGA-V1-A9O7-01	Primary Tumor	9.869	8.877	16.85	9
TCGA-YL-A8HM-01	Primary Tumor	9.859	9.137	18.83	9
TCGA-YL-A8HJ-01	Primary Tumor	9.859	8.783	17.8	9
TCGA-J9-A52D-01	Primary Tumor	9.8	8.534	18.53	9
TCGA-ZG-A9L6-01	Primary Tumor	9.769	8.755	19.08	9
TCGA-KK-A8IB-01	Primary Tumor	9.749	9.107	17.99	9
TCGA-KK-A8IC-01	Primary Tumor	9.74	9	17.47	9
TCGA-ZG-A9LS-01	Primary Tumor	9.73	9.161	16.95	9
TCGA-XK-AAIW-01	Primary Tumor	9.719	9.582	16.39	9
TCGA-YL-A8SI-01	Primary Tumor	9.707	8.605	19.1	9
TCGA-HI-7168-01	Primary Tumor	9.702	9.034	18.15	9
TCGA-YL-A9WI-01	Primary Tumor	9.696	8.706	18.09	9
TCGA-KK-A7B2-01	Primary Tumor	9.695	9.343	18.96	9
TCGA-J9-A52C-01	Primary Tumor	9.693	8.902	18.08	9
TCGA-ZG-A8QW-01	Primary Tumor	9.683	9.33	17.5	9
TCGA-J9-A52B-01	Primary Tumor	9.677	9.489	16.93	9
TCGA-ZG-A8QZ-01	Primary Tumor	9.677	8.856	18.5	9
TCGA-ZG-A9L9-01	Primary Tumor	9.675	9.439	16.39	9
TCGA-J9-A52E-01	Primary Tumor	9.671	8.724	16.18	9
TCGA-ZG-A9LB-01	Primary Tumor	9.662	9.259	18.37	9
TCGA-EJ-8469-01	Primary Tumor	9.652	8.507	17.64	9
TCGA-V1-A9Z9-01	Primary Tumor	9.644	8.837	19.19	9
TCGA-V1-A9ZG-01	Primary Tumor	9.635	8.879	18.01	9
TCGA-V1-A9Z7-01	Primary Tumor	9.628	8.892	17.4	9
TCGA-ZG-A9N3-01	Primary Tumor	9.595	9.812	14.78	9
TCGA-V1-A8WW-01	Primary Tumor	9.562	9.203	17.14	9
TCGA-EJ-5507-01	Primary Tumor	9.562	8.619	17.93	9
TCGA-VP-A87H-01	Primary Tumor	9.554	9.465	18.08	9
TCGA-ZG-A8QY-01	Primary Tumor	9.533	8.639	17.25	9
TCGA-ZG-A9LM-01	Primary Tumor	9.507	9.124	18.32	9
TCGA-KK-A6E7-01	Primary Tumor	9.493	9.345	19.12	9
TCGA-VP-AA1N-01	Primary Tumor	9.479	9.201	18.62	9
TCGA-CH-5772-01	Primary Tumor	9.456	8.113	18.55	9
TCGA-EJ-5514-01	Primary Tumor	9.438	8.123	14.95	9
TCGA-KK-A59Y-01	Primary Tumor	9.422	9.476	18.88	9
TCGA-2A-A8W3-01	Primary Tumor	9.41	8.617	17.9	9
TCGA-ZG-A9ND-01	Primary Tumor	9.388	8.538	19.18	9
TCGA-EJ-5524-01	Primary Tumor	9.364	7.936	17.85	9
TCGA-KK-A8I7-01	Primary Tumor	9.328	9.049	18.88	9
TCGA-CH-5741-01	Primary Tumor	9.326	8.658	19.2	9
TCGA-FC-A5OB-01	Primary Tumor	9.285	8.231	19.25	9
TCGA-ZG-A9NI-01	Primary Tumor	9.255	9.568	18.51	9
TCGA-KK-A6E8-01	Primary Tumor	9.24	8.759	19.61	9
TCGA-V1-A9Z8-01	Primary Tumor	9.236	9.36	18.11	9
TCGA-EJ-5518-01	Primary Tumor	9.213	8.798	17.86	9
TCGA-HC-7213-01	Primary Tumor	9.159	9.238	17.95	9
TCGA-ZG-A9MC-01	Primary Tumor	9.144	9.556	15.6	9
TCGA-ZG-A9L4-01	Primary Tumor	9.058	8.871	17.44	9
TCGA-HC-7081-01	Primary Tumor	9.04	8.492	17.87	9
TCGA-KK-A6E6-01	Primary Tumor	9.001	8.818	18.5	9
TCGA-KK-A7B0-01	Primary Tumor	8.977	9.99	18.29	9
TCGA-EJ-A65J-01	Primary Tumor	8.977	8.981	19.38	9
TCGA-EJ-5525-01	Primary Tumor	8.971	8.608	17.14	9
TCGA-G9-6499-01	Primary Tumor	8.954	8.882	19.01	9
TCGA-EJ-A65B-01	Primary Tumor	8.944	9.026	18.53	9
TCGA-HC-7232-01	Primary Tumor	8.944	8.468	18.32	9
TCGA-ZG-A9L2-01	Primary Tumor	8.82	8.932	18.28	9
TCGA-CH-5769-01	Primary Tumor	8.784	8.902	17.52	9
TCGA-G9-6356-01	Primary Tumor	8.734	8.929	17.78	9
TCGA-G9-6367-01	Primary Tumor	8.729	8.676	19.58	9
TCGA-CH-5792-01	Primary Tumor	8.71	9.182	17.97	9
TCGA-ZG-A9L1-01	Primary Tumor	8.564	8.925	17.85	9
TCGA-V1-A9O5-06	Metastatic	10.5	9.162	17.67	9
TCGA-XQ-A8TA-01	Primary Tumor	11.49	9.12	13.03	10
TCGA-CH-5751-01	Primary Tumor	10.65	8.966	16.2	10
TCGA-XK-AAIV-01	Primary Tumor	9.526	9.164	16.86	10
TCGA-G9-7523-01	Primary Tumor	8.674	8.483	17.6	10
