# Supplementary material for: Implications of the KHDC4-TRAF2 axis in the context of prostate cancer prognosis
Source: Aging (Albany NY). 2025 Jun 23;17(6):1544–70. doi: 10.18632/aging.206273 (PMC12245195; doi:10.18632/aging.206273)
Supplement: Supplementary Table 11 [file aging-17-206273-s011.xlsx]

## Sheet: Supplementary Table 11
Supplementary Table 11. Downstream effectors co-regulated by KHDC and TRAF2 in TCGA-PRAD datasets.
Names	total	elements
KHDC4+TRAF2	1054	ABCA17P
		ACAP3
		ACBD4
		ACCS
		ACIN1
		ACTR5
		ACYP1
		ADAMTS13
		ADCK5
		ADCY10P1
		AFG3L1P
		AGAP3
		AGAP4
		AGAP6
		AGER
		AHSA2
		AKAP17A
		AKAP8
		AKAP8L
		AKR7L
		ALDH8A1
		ALKBH6
		ALS2CL
		AMH
		AMY1A
		AMY2A
		AMY2B
		ANAPC2
		ANKK1
		ANKLE1
		ANKMY1
		ANKRD10
		ANKRD13B
		ANKRD13D
		ANKRD16
		ANKRD19P
		ANKRD23
		ANKRD9
		ANKS3
		ANKZF1
		AP1G2
		AP4B1
		APBB3
		APRG1
		ARFGAP1
		ARHGAP33
		ARHGAP39
		ARHGAP4
		ARHGEF1
		ARHGEF39
		ARIH2
		ARL16
		ARMC12
		ARRDC1-AS1
		ARVCF
		ASB16-AS1
		ASB6
		ASH1L-AS1
		ASIC3
		ASIC4
		ASMT
		ASMTL-AS1
		ATAD3B
		ATAT1
		ATG16L2
		ATG4B
		ATHL1
		ATOH7
		ATP6AP1L
		ATP6V1B1
		ATP6V1C2
		ATXN7L2
		ATXN7L3
		AXIN1
		AZIN2
		B4GALNT4
		BAIAP2L2
		BANP
		BCNP1
		BCO2
		BCRP3
		BCS1L
		BOD1
		BRAT1
		BRD9
		BRICD5
		BTHS
		C11orf53
		C11orf84
		C12ORF76
		C16orf93
		C17ORF67
		C19ORF18
		C19orf60
		C19orf66
		C1ORF159
		C1ORF174
		C1orf228
		C1ORF35
		C1ORF52
		C1QTNF12
		C1QTNF6
		C20ORF203
		C20ORF96
		C21ORF58
		C2ORF27A
		C2ORF68
		C4ORF47
		C5orf45
		C6ORF163
		C7orf43
		C8G
		C8ORF44
		C8orf59
		C8ORF76
		C9orf117
		C9ORF163
		C9orf173
		CA5BP1
		CACNB1
		CACTIN
		CALML6
		CAMSAP3
		CAPN10
		CAPN15
		CAPN3
		CARD14
		CARMIL3
		CARNS1
		CATSPER2
		CATSPER3
		CBLN3
		CBWD3
		CBWD7
		CC2D1B
		CCDC114
		CCDC116
		CCDC130
		CCDC150
		CCDC157
		CCDC17
		CCDC174
		CCDC183
		CCDC28B
		CCDC40
		CCDC57
		CCDC64B
		CCDC78
		CCHCR1
		CCNL2
		CCS
		CCT6P1
		CD27-AS1
		CDC25B
		CDC37
		CDCA3
		CDCA4
		CDH24
		CDK10
		CDK11A
		CDK3
		CDK5RAP1
		CDK5RAP3
		CDK9
		CDRT4
		CEACAM19
		CEL
		CELF6
		CEMP1
		CENPT
		CEP131
		CEP164
		CEP95
		CFAP70
		CHKA
		CHKB-CPT1B
		CHRNA10
		CHTF18
		CHTOP
		CIRBP
		CKS2
		CLASRP
		CLDN15
		CLEC18A
		CLEC18B
		CLEC18C
		CLEC2D
		CLK1
		CLK2
		CLK3
		CLNS1A
		CNIH2
		CNKSR1
		CNOT3
		COA5
		COL11A2
		COL7A1
		COLQ
		COPS7B
		CORO6
		CORO7
		COX19
		COX6B2
		CPLX1
		CPNE7
		CPSF1
		CPT1B
		CRIPAK
		CROCC
		CROCCP2
		CROCCP3
		CRTC2
		CRYBB3
		CRYGS
		CSAD
		CSNK1E
		CSNK1G2
		CTRL
		CTU1
		CUZD1
		CWC25
		CXXC1
		CYP2D6
		CYP2D7
		CYP2E1
		CYSRT1
		CYTH2
		D2HGDH
		DAZAP1
		DCAF15
		DCST2
		DCUN1D2
		DDIT3
		DDX12P
		DDX27
		DDX39A
		DDX39B
		DDX55
		DDX56
		DGCR8
		DHX34
		DICER1-AS1
		DLNB14
		DMAP1
		DNAH17
		DNAJC2
		DNAJC9
		DNASE1L2
		DNHD1
		DNM1P35
		DNMT3B
		DOC2A
		DOK3
		DONSON
		DPH7
		DPP9
		DRD4
		DRICH1
		DSCR9
		DUS3L
		DUSP28
		DUT
		DVL1
		DXO
		E4F1
		ECHDC2
		EED
		EFCAB10
		EFHC1
		EGFL8
		ELL
		ELMOD3
		EME1
		ENGASE
		ENO3
		ENTHD2
		ENY2
		EPOR
		EPS8L2
		ERAS
		ERMARD
		EVL
		EWSR1
		EXD3
		EXOSC2
		EXOSC3
		EXOSC8
		EXOSC9
		EXPAND1
		FAAP100
		FADS3
		FAHD2CP
		FAM118A
		FAM131A
		FAM13A-AS1
		FAM156A
		FAM160A2
		FAM166A
		FAM186A
		FAM193B
		FAM209A
		FAM227A
		FAM24B
		FAM41C
		FAM69B
		FAM72B
		FAM73B
		FAM86HP
		FANCA
		FANCC
		FASTK
		FBF1
		FBRSL1
		FBXL12
		FBXL19
		FBXL6
		FBXO43
		FBXO44
		FBXO46
		FER1L4
		FGF17
		FIGNL2
		FOXD4
		FOXD4L1
		FOXD4L6
		FOXH1
		FRS3
		FSCN2
		FUS
		GABBR1
		GABPB1-AS1
		GAS5
		GDF9
		GDPD3
		GEMIN2
		GGA1
		GHRLOS
		GIGYF1
		GKAP1
		GLI4
		GLTSCR1
		GNG3
		GNL2
		GNRH1
		GOLGA2P10
		GOLGA2P5
		GOLGA2P7
		GOLGA6L9
		GOLGA8A
		GOLGA8B
		GPC2
		GPR35
		GPSM1
		GPT
		GRB7
		GRIPAP1
		GSDMB
		GTF2H4
		GTF3C5
		GTPBP3
		GUCA1B
		GUSBP11
		H1FX
		HAGHL
		HAUS5
		HCG27
		HCN3
		HDAC10
		HDAC7
		HDHD3
		HEMK1
		HES4
		HES7
		HEXDC
		HGFAC
		HIKESHI
		HINFP
		HIST1H4D
		HIST1H4E
		HMGB2
		HNRNPD
		HNRNPH1
		HNRNPL
		HOXA2
		HPX
		HSD17B3
		HSD17B7P2
		HSF4
		HSPA6
		HSPA7
		HSPBAP1
		HTRA2
		IDUA
		IFT25
		IFT27
		IL11
		ILF3
		ILKAP
		INCA1
		ING5
		INHA
		INO80B
		INO80E
		INPP5E
		INTS11
		IP6K2
		IQCC
		IRF3
		IRF7
		ITGA2B
		ITGB1BP1
		ITIH4
		IZUMO4
		JMJD7-PLA2G4B
		KAT2A
		KAT8
		KCNIP2
		KCNMB3
		KCTD13
		KIAA0895L
		KIAA1875
		KIF18B
		KIFC2
		KLHL17
		KLKB1
		KMT2E-AS1
		KMT5C
		KRI1
		KRT72
		KRTAP5-1
		KRTAP5-9
		L3MBTL1
		LAT
		LBX2
		LCN12
		LEAP2
		LEMD2
		LENG8
		LGALS4
		LIG1
		LIME1
		LIN37
		LINC00115
		LINC00173
		LINC00174
		LINC00176
		LINC00240
		LINC00265
		LINC00282
		LINC00482
		LINC00634
		LINC00685
		LINC00852
		LINC00896
		LINC00899
		LINC00926
		LINC00930
		LINC00937
		LINC01001
		LINC01002
		LINC01089
		LINC01341
		LINC-PINT
		LLGL2
		LMBR1L
		LMNB2
		LMNTD2
		LMTK3
		LPIN3
		LRGUK
		LRP5L
		LRRC14
		LRRC56
		LSM7
		LSM8
		LSMEM1
		LTB4R
		LTB4R2
		LTK
		LUC7L
		LUC7L3
		LY6G5B
		LYAR
		LYG1
		LYSMD1
		LZTR1
		MAEA
		MAFK
		MAGOH
		MALSU1
		MAMDC4
		MAN2C1
		MAP3K10
		MAPK12
		MAPK15
		MAPK8IP3
		MAPKAPK5-AS1
		MAPRE3
		MARK3
		MARK4
		MC1R
		MCM7
		MED26
		MEF2B
		MEF2BNB-MEF2B
		MEG3
		MEN1
		METTL17
		MFSD10
		MGAT4B
		MIB2
		MICALL2
		MIIP
		MIOX
		MIR600HG
		MIRLET7BHG
		MITD1
		MKS1
		MOK
		MORN1
		MOV10
		MPLKIP
		MPP3
		MRGBP
		MROH1
		MROH6
		MRPS21
		MRPS25
		MRRF
		MS4A14
		MSANTD1
		MSANTD2
		MSH5
		MSI1
		MSL3
		MST1
		MST1L
		MST1P2
		MTA1
		MTERF2
		MTERF3
		MTG2
		MTMR9LP
		MUS81
		MXD3
		MYCBPAP
		MYO15B
		MZF1
		MZF1-AS1
		N4BP2L2-IT2
		NAAR1
		NADSYN1
		NAP1L4
		NASP
		NAT16
		NAT9
		NDUFAF5
		NDUFAF6
		NDUFAF7
		NDUFB2-AS1
		NEIL1
		NELFA
		NFKBID
		NFYC-AS1
		NGDN
		NHERF4
		NHLH1
		NIT1
		NME3
		NOL12
		NOP58
		NOXA1
		NOXO1
		NPEPL1
		NPFF
		NPIPB3
		NPPA
		NR2C2AP
		NRADDP
		NRF1
		NSMCE4A
		NSMF
		NSUN5
		NSUN5P1
		NSUN5P2
		NTN5
		NUP85
		NUTM2F
		NXF1
		OBSL1
		ODF2
		OGFOD2
		OGFR
		OGG1
		OR2B6
		ORC6
		P2RY11
		PABPC1L
		PABPN1
		PABPN1L
		PACSIN1
		PAM16
		PANX2
		PAQR6
		PARP10
		PARP2
		PBX4
		PCED1A
		PCGF1
		PCP2
		PCSK4
		PDCD5
		PDCD6
		PDCL3P4
		PDDC1
		PDIA2
		PFDN2
		PFDN6
		PGAM2
		PGS1
		PHF13
		PHYKPL
		PI4KAP1
		PIDD1
		PIF1
		PIGL
		PILRA
		PILRB
		PIN4P1
		PJVK
		PLA2G6
		PLAC8L1
		PLCB3
		PLCXD1
		PLEKHN1
		PLGLB2
		PLK5
		PMPCA
		PMS2P1
		PMS2P3
		PNMA3
		PNUTL1
		POLD1
		POLG2
		POLM
		POLR2J4
		POLRMT
		POM121L10P
		POU5F1
		POU5F1B
		POU6F1
		PPAN
		PPFIA4
		PPIEL
		PPIH
		PPOX
		PPP1R32
		PPP1R35
		PPP2R3B
		PRAX-1
		PRELID3A
		PRH2
		PRKRIP1
		PROCA1
		PROZ
		PRPF3
		PRPF40B
		PRR14
		PRR22
		PRR3
		PRR5-ARHGAP8
		PRRT2
		PRSS27
		PRSS50
		PSMC3IP
		PSMG3
		PTBP1
		PTGES2-AS1
		PTPRVP
		PUS1
		PVRIG
		PVT1
		PYY2
		QRICH2
		QTRT1
		RAB11FIP3
		RAB24
		RABL2A
		RAD54L
		RAD9A
		RALGDS
		RAPSN
		RASSF7
		RBCK1
		RBM10
		RBM14
		RBM17
		RBM19
		RBM39
		RBM5
		RBM6
		RCC2
		RCCD1
		RCE1
		RECQL5
		REM2
		REXO1
		REXO4
		RFC4
		RFNG
		RFX1
		RGL2
		RGL3
		RGS11
		RHBDL1
		RHBG
		RHOT2
		RHOXF1
		RHPN1
		RNASEH2C
		RNF149
		RNF207
		RNF31
		RNFT2
		RNPS1
		RPIA
		RPL30
		RPL36A
		RPS25
		RPSAP9
		RRP7BP
		RSPH10B2
		RSRP1
		RTEL1
		RUFY4
		RUSC1-AS1
		RXRB
		SAFB
		SAFB2
		SAPCD1
		SCARNA12
		SCARNA16
		SCARNA2
		SCARNA7
		SCNM1
		SCNN1D
		SCRIB
		SCRT1
		SCX
		SDHAP1
		SDHAP2
		SDHAP3
		SDR39U1
		SEC31B
		SELO
		SEM1
		SEMA6C
		SETD4
		SFI1
		SFSWAP
		SGK2
		SgK494
		SH2B1
		SH2D6
		SH3BP2
		SH3BP5L
		SH3D21
		SH3GLB2
		SIRT7
		SLC17A9
		SLC23A3
		SLC24A5
		SLC25A14
		SLC25A2
		SLC25A27
		SLC25A29
		SLC25A34
		SLC25A45
		SLC26A10
		SLC26A11
		SLC26A6
		SLC29A2
		SLC34A3
		SLC39A5
		SLC7A9
		SLC9A5
		SLFNL1
		SMG5
		SMPD4
		SNAPC4
		SNHG1
		SNHG10
		SNHG12
		SNHG15
		SNHG17
		SNHG20
		SNHG3
		SNHG7
		SNHG9
		SNORA57
		SNORA72
		SNORA8
		SNRNP70
		SNRPF
		SPACA6P
		SPAG5
		SPATA24
		SPDYA
		SPDYE6
		SPIRE2
		SPPL2B
		SPRN
		SPSB3
		SPTBN5
		SRCIN1
		SRRM2-AS1
		SRRM5
		SRRT
		SRSF2
		SRSF4
		SS18L2
		STAG3
		STAG3L3
		STK11
		STK19
		STK25
		STKLD1
		STRC
		STX10
		STX1A
		SUGP1
		SULT1A2
		SULT1A3
		SURF6
		SUZ12P1
		SYCE2
		TACC3
		TAF11
		TAF15
		TAF1C
		TAF1D
		TAOS1
		TAS2R20
		TBC1D3
		TBC1D3B
		TBC1D3C
		TBX19
		TCF3
		TCTEX1D3
		TELO2
		TERT
		TEX29
		TFAP2E
		THBS3
		THOC1
		THOC6
		THUMPD2
		THUMPD3-AS1
		TIGD1
		TIGD5
		TJAP1
		TMA7
		TMCO6
		TMEM116
		TMEM138
		TMEM151B
		TMEM184A
		TMEM234
		TMEM249
		TMEM259
		TMEM31
		TMEM80
		TMEM81
		TMEM86B
		TMEM91
		TMPO-AS1
		TMPRSS5
		TMUB2
		TNFRSF14
		TNFRSF18
		TNFRSF25
		TNFRSF6B
		TNK2
		TNNT2
		TONSL
		TOP3B
		TPT1-AS1
		TRA2A
		TRABD
		TRAF1
		TRAIP
		TREX2
		TRIM45
		TRIM50
		TRIM65
		TRIM74
		TRMT1
		TRMT2A
		TRMU
		TROAP
		TRPV1
		TSEN2
		TSEN54
		TSNARE1
		TSNAXIP1
		TSPAN32
		TSSK3
		TTC16
		TTC21A
		TTC28-AS1
		TTLL10
		TTLL13P
		TTLL3
		TUBB3
		TUBGCP6
		TYK2
		U2AF1
		U2AF1L4
		U2AF2
		UAP1L1
		UBAP1L
		UBE2C
		UBE2I
		UBXN11
		UCKL1
		UCKL1-AS1
		UCN
		UCP3
		ULK1
		ULK3
		UNC13D
		UNC5CL
		UNKL
		UPF3A
		UPF3B
		UQCRHL
		URAHP
		USF1
		USF2
		USP20
		VARS2
		VCPKMT
		VWA3A
		WASH3P
		WASH5P
		WASH7P
		WDR27
		WDR5
		WDR73
		WDR90
		WFIKKN1
		WHRN
		WNT10B
		WRAP73
		XRCC3
		YJEFN3
		YY1AP1
		ZAP70
		ZBTB17
		ZBTB32
		ZBTB48
		ZBTB49
		ZC3H3
		ZCCHC3
		ZDHHC8
		ZFP41
		ZFYVE27
		ZGLP1
		ZGPAT
		ZMIZ1-AS1
		ZMIZ2
		ZMYND19
		ZNF133
		ZNF137P
		ZNF174
		ZNF202
		ZNF205
		ZNF212
		ZNF226
		ZNF251
		ZNF252P-AS1
		ZNF26
		ZNF263
		ZNF266
		ZNF276
		ZNF282
		ZNF296
		ZNF3
		ZNF335
		ZNF337
		ZNF341
		ZNF343
		ZNF419
		ZNF436-AS1
		ZNF497
		ZNF513
		ZNF517
		ZNF530
		ZNF547
		ZNF554
		ZNF580
		ZNF598
		ZNF600
		ZNF692
		ZNF696
		ZNF7
		ZNF706
		ZNF707
		ZNF75A
		ZNF76
		ZNF764
		ZNF767P
		ZNF768
		ZNF789
		ZNF814
		ZNF83
		ZNF839
		ZNF862
		ZRSR2
		ZSCAN16
		ZSCAN18
		ZSCAN21
		ZSCAN9
		ZSWIM4
		LARRPM	lncRNA
		TNFRSF14-AS1	lncRNA
		LINC02145	lncRNA
		LCDR	lncRNA
		EOLA1-DT	lncRNA
		EOLA2-DT	lncRNA
		HDHD5-AS1	lncRNA
		LINC02897	lncRNA
		LINC01590	lncRNA
		PAXIP1-DT	lncRNA
		FAM226B	lncRNA
		SPEN-AS1	lncRNA
		H2AZ1-DT	lncRNA
		IRF1-AS1	lncRNA
		LINC02878	lncRNA
		LINC02210	lncRNA
		FAM223B	lncRNA
		H1-10-AS1	lncRNA
		DDX12B	ncRNA
		RABGEF1P1	Pseudogene
		ANAPC1P2	Pseudogene
		TOP1P2	Pseudogene
		WASH8P	Pseudogene
		LOC730668	Pseudogene
		NFE2L3P2	Pseudogene
		SPDYE8	Pseudogene
		ARHGAP27P1	Pseudogene
		SMPD4BP	Pseudogene
		HAVCR1P1	Pseudogene
		SNORA50C	snoRNA
KHDC4	944	FAM219A
		TUBD1
		GNL3
		GAPDHS
		ATF6B
		TESMIN
		ANKRD36B
		H3C12
		CLK4
		ZNF799
		ZNF785
		U2SURP
		CUBN
		MTHFD2L
		BRIX1
		TEKTIP1
		SNORD1C
		MSL1
		LINC00235
		ZBTB12
		CHORDC1
		BTN2A1
		DDX5
		SLC26A1
		DHX35
		ZNF131
		RPA4
		ANAPC4
		EHBP1-AS1
		TBC1D3H
		GRM2
		ZNF181
		HERC2P2
		PTCD3
		ACTG1P4
		ZNF182
		RIOK1
		PCGF3
		CDK20
		ACSBG2
		CCDC66
		NUTM2G
		SLC6A10P
		C1QTNF3
		IPW
		TAF5
		SPDYE7P
		NUP42
		ZNF529
		CPLX3
		DCAF4L1
		C14ORF39
		MKNK1
		TRA2B
		ZNF345
		KNTC1
		MFSD8
		TIAL1
		INE1
		KLF3-AS1
		NR2E3
		GOLGA6L10
		SRSF6
		TRIM41
		PLEKHG4
		C15ORF62
		N4BP2L2
		DLEU2L
		LINC01011
		C17ORF75
		OTUD3
		SETDB1
		ENOSF1
		FBXL19-AS1
		TMEM120B
		SRSF11
		HESX1
		ZNF239
		MYADML2
		FAM76B
		ZNF284
		ZNF605
		CHFR
		MPP4
		OTUD6B
		ZNF534
		TASP1
		EDRF1
		SLC13A4
		POLG
		POGZ
		LUC7L2
		IDO2
		ZSCAN32
		PDPR2P
		SEPTIN4
		UQCC1
		SENP7
		ANKRD49
		PPEF2
		OFD1
		SLC22A14
		TP73-AS1
		DHX16
		HPS4
		PABIR2
		ARL6IP6
		GPATCH2
		DIDO1
		ZNF320
		CCDC18
		CBARP
		BRD8
		HEPHL1
		ANKLE2
		SLC9A3
		FAM218A
		NKTR
		RBM44
		PTPN2
		GIPR
		NFYA
		AHI1
		GORAB
		LINC00938
		PDCD6P1
		SPDYE5
		DLEC1
		PLXNB3
		TTC41P
		ACAD11
		TRAF2
		UIMC1
		ZNF667
		PRPF39
		DZANK1
		BMS1P2
		JPX
		KIN
		DUS4L
		H2BC18
		ZNF738
		AHRR
		RALGPS1
		VMP1
		MFSD14CP
		PHF21B
		TTC13
		GUSBP1
		BASP1-AS1
		CELSR3
		H2AC21
		KLKP1
		NFRKB
		ZGRF1
		ZNF384
		CFAP44
		ABCC2
		PFN1P2
		CSPP1
		ZMYM5
		ZNF586
		NAIP
		CFAP43
		FAM193A
		MEMO1
		TBC1D8
		NAPB
		HSFY2
		HASPIN
		RAD54B
		MIR17HG
		DGCR5
		JRK
		ZNF177
		LINC02591
		POM121L9P
		SPDL1
		LOC728989
		CBX1
		USH2A
		AURKAP1
		ARR3
		AIRIM
		PLEKHM1P1
		EME2
		NPIPB5
		FAM157A
		KCNV2
		DNMT3A
		SLC7A5P2
		ORMDL1
		USP35
		FAM72D
		ZNF740
		LINC01000
		MEX3D
		NKAPP1
		SPATA9
		SPDYE1
		DNA2
		DMTF1
		KMT2B
		ZNF514
		GRTP1
		DLEU2
		MSTO2P
		POFUT2
		THEM4
		ZNF354A
		GOLGA6L5P
		WSB1
		SPATC1
		POLR1HASP
		ZXDC
		ZNF780B
		CCDC14
		CEP72
		SCART1
		MBL1P
		CPO
		CCNA2
		RNPC3
		GTSE1
		NUF2
		RPL23AP64
		DYNC2I1
		MOSMO
		NAA40
		KLHDC2
		TRMT11
		NPHP3
		LRRC39
		LINC03025
		ARGLU1
		MROH5
		ANAPC10
		TARBP1
		ZNF75D
		SERINC4
		GTPBP2
		CHP1P2
		PWAR1
		RPS15AP10
		GBA2
		DOCK6
		ZDHHC17
		ITGA10
		QSOX2
		VPS29
		PNISR
		ZNF577
		IQGAP3
		MTF2
		DUSP12
		INPPL1
		IGHMBP2
		FAM238C
		LINC01134
		C12ORF71
		DCST1
		ZFP62
		ZNF84
		TAS2R31
		ALOX12
		LINC00964
		ZNF528
		BMS1P1
		ZNF44
		TCHP
		CENPE
		ZFAND1
		RRN3P3
		PHC1
		RBM12B-AS1
		SRSF7
		LSM14B
		TAS2R5
		ABCA10
		AFDN-DT
		STK36
		BRPF1
		TAS2R4
		CEP290
		TEDDM1
		TBCE
		MPHOSPH10
		HNRNPA2B1
		DPM1
		MSH4
		TSC1
		AASS
		TNRC6A
		ZNF793
		ADHFE1
		RAD9B
		OXSM
		ADORA2A-AS1
		FBXW10
		LHX4
		GOLGA6B
		IKBKB
		IZUMO1
		RFPL3S
		ZC3H8
		ZMAT1
		DNAJB7
		MEX3A
		MRPL23-AS1
		OR2H2
		DPY19L2P1
		C5ORF63
		RNF146
		TRIM66
		RPL32P3
		ZNF10
		GLMN
		ZNF763
		KRTAP5-8
		TRIM52
		TBC1D3G
		ZNF786
		ASPG
		PRICKLE4
		TYW5
		ASPDH
		PABIR3
		CPSF6
		MASP2
		ZNF211
		SMG1P3
		TTLL9
		STK31
		LRRC37B
		SLC22A13
		C1RL-AS1
		TCERG1
		ANKRD36
		LINC01126
		SCLT1
		PPP1R3E
		ABCC5
		NSUN6
		CHORDC1P4
		PRDM10
		CMTR1
		ZNF433
		DNAJC27
		ABCA11P
		CCNE2
		NBPF7P
		PDE7A
		UVSSA
		UTP6
		PMPCB
		EHMT1
		CDAN1
		FAM72A
		IFT88
		BTN2A3P
		KLHL31
		KANSL3
		TARDBP
		ZNF160
		PAN3
		SETD1B
		CDK2
		NABP1
		ZNF606
		UNC50
		NUP107
		PLIN5
		SLC25A36
		RPP38-DT
		ZNF169
		POLE
		BBS5
		DDX17
		L3HYPDH
		DDX59
		ZNF559
		COL6A4P2
		ANKRD20A11P
		ASB14
		NR2C1
		LEKR1
		ZNF594
		AFG2B
		NUDT13
		PLEKHD1
		CBX3
		PAXBP1
		ZNF782
		ZNF512B
		MSLNL
		SNORA31
		OR51D1
		LINC00479
		ZNF550
		BRD2
		SPIN3
		ZNF746
		CPOX
		OMP
		TENT4A
		USP36
		ZNF830
		ZNF567
		FAM219B
		GATA2
		S100PBP
		RABL2B
		ZNF37BP
		ZNG1B
		STAG3L2
		TTC14
		NFYB
		PNPLA7
		ASXL1
		ZNF135
		ANO8
		CUTALP
		SHISA7
		WHAMM
		RUFY3
		PMS2P2
		CENPK
		FDPSP2
		RMST
		LINC00244
		ZNF418
		ZNF404
		PMS1
		CDRT15P1
		RAB28
		TLK2
		TSSK6
		ZNF207
		EXOC7
		YAE1
		PSPC1
		ALB
		ZNF823
		LINC02910
		FAM47E
		SEC61A2
		USP32P1
		HAUS3
		TPTE2P6
		CCP110
		MCM3AP-AS1
		LRIT3
		RNF222
		SNORA67
		RBM25
		NOXRED1
		CRAMP1
		CCDC7
		TNPO2
		MGRN1
		ZNF674-AS1
		ATXN2L
		SCAF4
		FKBP6
		RBM28
		SRRM2
		ZNF682
		PMS2P9
		PBX2
		RELL2
		TTTY10
		CCDC183-AS1
		GUSBP4
		LINC00526
		ZNF235
		RBM48
		ESPNP
		AOC2
		BTAF1
		SLC19A2
		ZBED5
		BCDIN3D-AS1
		ZNF471
		GNB3
		ZNF224
		HMGB1
		ZNF519
		SENP5
		CEP295
		XRCC2
		C1ORF220
		ZNF485
		SLFN14
		DFFB
		OCLM
		MNAT1
		DNAH14
		MAST2
		ZNF189
		SLTM
		KANSL2
		ZNF473
		TIA1
		SLC25A37
		POLI
		ZBTB34
		CLHC1
		KCNAB3
		SNHG4
		ZNF248
		AGAP5
		LINC01106
		KCTD15
		PTPDC1
		SMARCD1
		FAM201A
		FBP2
		CCDC50
		ATAD2B
		TAS2R10
		TAF7
		AGAP11
		SFPQ
		NSD2
		KCNT1
		MRI1
		ZNF500
		PTPN12
		TBC1D29P
		CLCN6
		SCARNA9
		MAN2A2
		GABPB2
		INTU
		YOD1
		PHKA2
		ZNF274
		KDM5C
		CCDC39
		PLCG1
		ZNF407-AS1
		DPRXP4
		RBM33
		ZNF141
		SUGT1P4-STRA6LP-CCDC180
		GGA3
		RNF138P1
		ZNF321P
		ZNF749
		SEC16B
		EZH2
		VAMP1
		IDI2-AS1
		ADAT2
		CSTF3
		USP49
		TEFM
		WIZ
		TMC2
		CEP170B
		RNF34
		PNMA5
		OR13G1
		FANCL
		SECISBP2
		ANKAR
		GABRR2
		MYEF2
		PACRGL
		SNORA63
		IFITM5
		TRMT10B
		WDR75
		KLRA1P
		WHAMMP2
		GSAP
		H2BC7
		ZNF311
		TSC2
		BNIP2
		ARGFXP2
		CPSF7
		ZNF382
		EXOSC10
		INTS8
		LINC02593
		MAU2
		ZNF721
		HAL
		RNF113B
		C5ORF58
		PAN2
		NEAT1
		SNORA24
		POM121L1P
		ABCA15P
		IFT80
		SUN1
		HOXD4
		SEPTIN7P2
		ZNF540
		PDCD7
		DNAH1
		PSMC6
		NAA16
		TAMM41
		GOLGA1
		USPL1
		ZNF80
		PRPF4B
		BTBD16
		GARIN1A
		ZNF502
		KCNQ1OT1
		CDC42SE1
		TRIM78P
		CLCN2
		POU5F2
		TAS2R19
		PMS2CL
		HSF2BP
		ALG13
		MYH3
		PRORSD1P
		DCDC2B
		GATAD1
		AVIL
		RRN3P1
		DPY19L2P4
		LINC00999
		ZEB1-AS1
		PIP5K1A
		ACRBP
		UNK
		RAD52
		RWDD3
		DENND4B
		EP400P1
		TPCN2
		MBD4
		ZNF234
		KCNC3
		FAR2P1
		AGK
		CEP83
		GPR45
		REV1
		UOX
		N6AMT1
		TTC32
		NPIPA1
		SETD5
		TICRR
		ODF2L
		PCID2
		TRMT13
		AXDND1
		POLR3E
		TBC1D26
		CABLES2
		ANKRD36BP2
		DPY19L2
		MTERF1
		AACSP1
		MDM1
		SSUH2
		ZNF599
		ZNF630
		TAF4
		GOLGA8IP
		OSGEPL1
		TBP
		PPP1R26
		ZNF195
		CREBZF
		MTBP
		ASB16
		VAV2
		ERCC3
		LINC02800
		SNORD116-28
		PRKAG2
		PRPF38B
		GRB14
		LINC02908
		MIAT
		CCDC30
		ZNF621
		C10ORF88B
		POLQ
		IQCB1
		HNRNPH3
		FOXD4L4
		CCDC62
		IFRD1
		CEP43
		ATG9B
		ADCY10
		ZRANB2
		TRIP13
		DOT1L
		NEB
		CCDC93
		PDXDC2P-NPIPB14P
		BRD1
		CMAHP
		CASKIN1
		TAS2R14
		RPL13AP6
		KCNJ14
		INTS3
		ZNF558
		H2AC15
		CCDC142
		SUGT1P3
		SF1
		TMEM14EP
		FAM200B
		B3GAT2
		LINC01588
		UBE2G2
		PLIN1
		CNEP1R1
		ZNF333
		KATNBL1
		TUBE1
		LINC00319
		H4C9
		TIGD7
		PPT2
		CLUHP3
		PHRF1
		IQCN
		ZNF140
		OPLAH
		OGT
		CCDC154
		AARS2
		NBEAL2
		FASTKD3
		PRPF4
		NPHP4
		TAF1A
		GPATCH1
		AGBL3
		GPR179
		DVL3
		KRIT1
		TTC31
		TRIM67
		SNX29P2
		CABP4
		CCNL1
		USP6
		SDHAP4
		TMPRSS9
		ZNF732
		SPATA25
		METAP1D
		ZNF491
		GPR137C
		PPEF1
		PCDHGB8P
		BMS1P4
		RPS10P7
		TEX44
		PIWIL4
		ZNF354B
		MMP21
		GAL3ST2
		PCF11
		CCDC191
		MED17
		MBD6
		ZNF23
		COL28A1
		FNBP4
		SKOR1
		SRSF10
		MYO19
		ZFC3H1
		HNRNPDL
		GPR152
		HPN-AS1
		MCM9
		ZNF302
		CCDC144CP
		ZNF773
		VHLL
		XPO1
		LRRC74B
		ZNF300
		LENEP
		ZNF449
		SMC1B
		HOOK2
		MGME1
		ZNF841
		RPAIN
		PDZK1P1
		SRSF1
		NCBP2
		UBE2E1
		CAPRIN2
		SF3B1
		STAG3L1
		DBF4B
		TTF1
		ZNF256
		SSPOP
		CLK2P1
		RANBP17
		LINC00205
		LRRC37A3
		PROB1
		NBPF11
		ELF2
		PRKY
		ADCY6
		ZNF273
		NPIPB13
		NFATC2IP
		SCML1
		MLLT10
		SALL4
		GARIN5B
		ZCCHC8
		SUPT20H
		SYCP2
		VN1R1
		SUGP2
		TSSK4
		PI4KAP2
		MSTN
		ZC3H11A
		IMPG1
		ZNF587
		NVL
		CYP2C8
		PRPF38A
		MLH3
		ALMS1P1
		DTX2P1-UPK3BP1-PMS2P11
		IFT81
		RBMX
		SNORA71E
		ZNF700
		TTC23L
		BCCIP
		CIT
		ZNF607
		SNORD10
		PTBP2
		SCAND2P
		OGA
		ME3
		CCDC146
		FAM221A
		HNRNPA3
		NRBP2
		CHERP
		PDZK1
		ZNF443
		MTRF1
		INTS6L
		SEPHS1P1
		SGSM2
		NUTM2A-AS1
		VEGFD
		E2F6
		PGBD2
		RSRC2
		EFCAB13
		ZNF77
		SNORA52
		MALAT1
		GAS8-AS1
		SS18L1
		SLC16A8
		SREK1
		GTF2IRD1
		EEF1AKMT2
		MORC2
		TPTEP2
		ZNF222
		PRDM15
		DSN1
		NBPF9
		SUMO4
		KDM5D
		RNF19A
		ZNF326
		FASTKD1
		ZNF112
		STX16
		TRIT1
		LRP2BP
		ZNF250
		TATDN1
		CEP44
		TEX56P
		ZBTB5
		SRSF5
		ANP32A-IT1
		NUP43
		HNRNPA1P33
		CYP4F30P
		FAM200C
		EBLN2
		ARL17A
		METTL3
		SUPT7L
		LRRC37A
		SEC14L1P1
		YTHDC1
		ATAD5
		KRBOX4
		POM121
		PNN
		LRRD1
		WHAMMP3
		NEK3
		ATG14
		MDH1B
		ARHGAP27
		MAT2A
		SIN3B
		RNF44
		STARD7-AS1
		UBE2Q2P1
		PPWD1
		MDM4
		PTCH2
		FLRT1
		HDAC6
		ZNF200
		FTX
		CYP2R1
		H2BC17
		SPEF2
		DCAF8
		PTMAP11
		ZNF833P
		ZNF638
[truncated: 2,063 more rows]
